# Supplementary material for: Towards elimination of lymphatic filariasis in southeastern Madagascar: Successes and challenges for interrupting transmission
Source: PLoS Negl Trop Dis. 2018 Sep 17;12(9):e0006780. doi: 10.1371/journal.pntd.0006780 (PMC6160210; doi:10.1371/journal.pntd.0006780)
Supplement: S1 Dataset — The data for each of the three surveys is presented in a separate excel sheet. (XLSX) [file pntd.0006780.s005.xlsx]

## Sheet: IFD Community Survey
ID	Fokontany	Age	Sex	Has attended 1ary school or higher	Education level	Kows about MDA	Information source	Has taken MDA during last round	Slept under a bed net the previous night	FTS result
1	1	22	Female	Yes	primary	Yes	CHW	Yes	Yes	Negative
2	1	46	Female	Yes	primary	Yes	CHW	No	No	Negative
3	1	41	Female	Yes	primary	Yes	CHW	Yes	Yes	Negative
4	1	22	Female	Yes	secondary	Yes	CHW	Yes	Yes	Negative
5	1	23	Female	Yes	primary	Yes	CHW	Yes	Yes	Negative
6	1	33	Female	Yes	primary	Yes	CHW	Yes	Yes	Negative
7	1	39	Male	No		Yes	CHW	Yes	Yes	Negative
8	1	60	Female	Yes	primary	Yes	CHW	Yes	Yes	Negative
9	1	47	Male	Yes	secondary	Yes	CHW	Yes	Yes	Positive
10	1	61	Male	Yes	primary	Yes	CHW	Yes	Yes	Negative
11	1	26	Female	No		Yes	CHW	Yes	Yes	Negative
12	1	12	Female	Yes	primary	Yes	teacher	Yes	Yes	Negative
13	1	16	Male	No		Yes	CHW	Yes	Yes	Negative
14	1	38	Female	Yes	primary	Yes	CHW	Yes	Yes	Negative
15	1	58	Male	Yes	secondary	Yes	CHW	Yes	No	Negative
16	1	53	Male	Yes	primary	Yes	CHW	Yes	Yes	Negative
17	1	53	Female	No		Yes	CHW	Yes	Yes	Negative
18	1	24	Male	No		Yes	CHW	Yes	Yes	Negative
19	2	10	Male	Yes	primary	Yes	teacher	Yes	Yes	Negative
20	2	10	Male	Yes	primary	Yes	teacher	Yes	Yes	Negative
21	2	9	Male	Yes	primary	Yes	CHW	No	No	Negative
22	2	15	Female	Yes	secondary	Yes	CHW,teacher	No	Yes	Negative
23	2	26	Male	Yes	secondary	Yes	radio,CHW	Yes	Yes	Negative
24	2	46	Male	Yes	secondary	Yes	CHW	Yes	No	Negative
25	2	25	Female	No		Yes	CHW	Yes	Yes	Negative
26	2	10	Male	Yes	primary	No		No	No	Negative
27	2	25	Female	Yes	secondary	Yes	CHW	Yes	Yes	Negative
28	2	5	Female	Yes	primary	Yes	teacher	Yes	Yes	Negative
29	2	27	Female	Yes	secondary	Yes	CHW	No	Yes	Negative
30	2	15	Female	No		Yes	CHW	Yes	No	Negative
31	2	8	Female	Yes	primary	Yes	friend or neighbor	Yes	No	Negative
32	2	13	Female	Yes	primary	No		No	Yes	Negative
33	2	23	Female	Yes	university	Yes	CHW	Yes	Yes	Negative
34	2	14	Female	Yes	secondary	Yes	CHW	Yes	Yes	Negative
35	2	36	Female	Yes	university	Yes	radio	No	No	Negative
36	2	20	Male	Yes	secondary	Yes	teacher	No	Yes	Negative
37	2	38	Female	Yes	secondary	Yes	CHW	Yes	Yes	Negative
38	3	62	Male	Yes	primary	Yes	health staff,CHW	Yes	Yes	Positive
39	3	31	Female	No		Yes	CHW	No	Yes	Negative
40	3	6	Male	Yes	primary	Yes	CHW	Yes	No	Negative
41	3	37	Male	Yes	primary	Yes	CHW	No	Yes	Negative
42	3	32	Female	Yes	primary	Yes	CHW	No	Yes	Positive
43	3	58	Male	Yes	primary	Yes	CHW	Yes	Yes	Positive
44	3	51	Female	Yes	primary	Yes	CHW	Yes	Yes	Positive
45	3	40	Female	Yes	primary	Yes	CHW	Yes	Yes	Negative
46	3	30	Female	Yes	primary	Yes	CHW	Yes	No	Positive
47	3	20	Female	Yes	primary	No		No	Yes	Negative
48	3	7	Male	Yes	primary	Yes	CHW	Yes	No	Negative
49	3	33	Male	No		Yes	CHW	Yes	Yes	Negative
50	3	27	Male	No		Yes	CHW	Yes	No	Positive
51	3	25	Male	No		Yes	friend or neighbor	Yes	Yes	Negative
52	3	28	Female	Yes	primary	Yes	CHW	Yes	Yes	Negative
53	3	21	Male	Yes	secondary	Yes	CHW	Yes	Yes	Negative
54	3	45	Male	Yes	primary	Yes	CHW	Yes	Yes	Positive
55	3	8	Male	Yes	primary	Yes	teacher	Yes	Yes	Positive
56	3	40	Female	No		Yes	health staff,CHW	Yes	Yes	Negative
57	4	20	Male	Yes	secondary	Yes	CHW	No	No	Negative
58	4	47	Female	Yes	primary	Yes	CHW	No	Yes	Positive
59	4	36	Female	Yes	primary	Yes	CHW	No	Yes	Negative
60	4	69	Male	Yes	primary	Yes	CHW	No	No	Negative
61	4	43	Male	Yes	primary	Yes	CHW	No	Yes	Positive
62	4	25	Female	Yes	primary	Yes	CHW	No	Yes	Negative
63	4	19	Female	Yes	primary	Yes	CHW	No	Yes	Negative
64	4	40	Female	Yes	primary	Yes	CHW	No	Yes	Negative
65	4	20	Female	Yes	primary	No		No	Yes	Negative
66	4	35	Female	No		No		Yes	Yes	Negative
67	4	14	Female	Yes	primary	Yes	CHW	No	Yes	Negative
68	4	14	Male	No		Yes	CHW	No	Yes	Negative
69	4	24	Female	No		Yes	CHW	Yes	Yes	Positive
70	4	54	Female	No		Yes	CHW	Yes	Yes	Negative
71	4	20	Female	Yes	primary	No		No	Yes	Negative
72	4	53	Female	Yes	secondary	Yes	health staff	Yes	Yes	Positive
73	4	56	Female	Yes	secondary	Yes	teacher	Yes	Yes	Negative
74	4	49	Female	Yes	primary	Yes	CHW	No	Yes	Negative
75	5	44	Male	Yes	primary	Yes	CHW	Yes	No	Negative
76	5	18	Male	Yes	primary	Yes	CHW	Yes	No	Positive
77	5	42	Male	Yes	primary	Yes	CHW	Yes	No	Negative
78	5	6	Female	Yes	primary	Yes	CHW	Yes	Yes	Negative
79	5	10	Female	Yes	primary	Yes	CHW	Yes	Yes	Negative
80	5	32	Male	Yes	primary	Yes	CHW	Yes	Yes	Positive
81	5	6	Male	Yes	primary	Yes	CHW	Yes	Yes	Negative
82	5	53	Female	Yes	primary	Yes	CHW	Yes	Yes	Negative
83	5	33	Male	Yes	primary	Yes	CHW	Yes	Yes	Positive
84	5	30	Male	Yes	primary	Yes	CHW	No	Yes	Negative
85	5	72	Female	No		Yes	CHW	Yes	Yes	Negative
86	5	8	Female	Yes	primary	Yes	teacher	Yes	No	Negative
87	5	31	Male	No		No		No	Yes	Positive
88	5	18	Male	Yes	secondary	Yes	friend or neighbor	No	Yes	Positive
89	5	13	Male	Yes	primary	No		No	Yes	Negative
90	5	32	Female	Yes	primary	No		No	Yes	Positive
91	5	35	Female	Yes	primary	Yes	CHW	Yes	Yes	Negative
92	5	17	Female	Yes	primary	Yes	CHW	No	Yes	Negative
93	6	69	Male	Yes	primary	No		No	Yes	Negative
94	6	12	Female	Yes	primary	Yes	teacher	No	No	Negative
95	6	5	Female	No		Yes	health staff	Yes	No	Negative
96	6	40	Female	Yes	primary	No		No	Yes	Negative
97	6	21	Male	Yes	secondary	No		No	Yes	Negative
98	6	17	Male	Yes	secondary	Yes	CHW	Yes	Yes	Negative
99	6	40	Female	Yes	primary	No		No	Yes	Negative
100	6	45	Female	Yes	primary	Yes	CHW	No	Yes	Negative
101	6	57	Female	Yes	primary	Yes	CHW	No	Yes	Negative
102	6	34	Female	Yes	primary	Yes	CHW	Yes	Yes	Negative
103	6	34	Female	Yes	primary	Yes	CHW	Yes	Yes	Negative
104	6	83	Female	Yes	primary	No		Yes	No	Negative
105	6	26	Female	Yes	secondary	Yes	CHW	No	No	Negative
106	6	13	Female	Yes	primary	Yes	teacher	Yes	Yes	Negative
107	6	28	Male	Yes	primary	Yes	CHW	No	No	Negative
108	6	12	Female	Yes	primary	Yes	teacher	No	Yes	Negative
109	6	10	Male	Yes	primary	Yes	teacher	No	Yes	Negative
110	6	10	Male	Yes	primary	Yes	teacher	Yes	No	Negative
111	7	12	Female	Yes	primary	Yes	CHW	Yes	No	Positive
112	7	17	Female	Yes	primary	No		No	No	Negative
113	7	19	Female	Yes	primary	Yes	CHW	No	Yes	Negative
114	7	14	Male	Yes	primary	Yes	teacher	Yes	Yes	Negative
115	7	12	Male	Yes	primary	Yes	teacher	Yes	Yes	Negative
116	7	32	Female	No		Yes	CHW	No	Yes	Positive
117	7	58	Female	Yes	secondary	Yes	CHW	Yes	Yes	Negative
118	7	41	Female	Yes	primary	Yes	CHW	Yes	Yes	Negative
119	7	10	Female	Yes	primary	Yes	teacher	Yes	Yes	Negative
120	7	31	Female	No		Yes	CHW	Yes	Yes	Positive
121	7	8	Female	Yes	primary	Yes	teacher	Yes	Yes	Negative
122	7	6	Male	Yes	primary	Yes	CHW,teacher	Yes	No	Negative
123	7	18	Female	Yes	secondary	Yes	CHW	Yes	Yes	Negative
124	7	29	Male	Yes	primary	No		No	Yes	Negative
125	7	59	Male	Yes	primary	Yes	CHW	No	Yes	Negative
126	7	50	Male	Yes	secondary	Yes	CHW	Yes	No	Negative
127	7	22	Male	Yes	primary	Yes	CHW	Yes	Yes	Negative
128	7	50	Female	Yes	secondary	No		No	Yes	Negative
129	8	40	Female	No		Yes	CHW	No	Yes	Positive
130	8	7	Female	Yes	primary	Yes	teacher	Yes	Yes	Negative
131	8	5	Female	Yes	primary	Yes	teacher	Yes	Yes	Negative
132	8	37	Male	Yes	primary	Yes	CHW	Yes	Yes	Negative
133	8	8	Female	Yes	primary	Yes	teacher	Yes	Yes	Negative
134	8	25	Female	Yes	secondary	Yes	CHW	No	Yes	Negative
135	8	25	Female	No		Yes	CHW	Yes	Yes	Negative
136	8	20	Male	Yes	primary	Yes	CHW	Yes	Yes	Negative
137	8	8	Male	Yes	primary	Yes	teacher	Yes	Yes	Negative
138	8	23	Male	Yes	primary	Yes	CHW	Yes	Yes	Negative
139	8	40	Male	Yes	primary	Yes	CHW	Yes	Yes	Negative
140	8	50	Female	Yes	primary	Yes	CHW	Yes	Yes	Positive
141	8	50	Male	Yes	primary	Yes	CHW	Yes	Yes	Positive
142	8	18	Male	Yes	primary	Yes	CHW	Yes	Yes	Negative
143	8	13	Male	Yes	primary	Yes	teacher	Yes	Yes	Negative
144	8	20	Male	Yes	primary	Yes	CHW	Yes	Yes	Negative
145	8	21	Female	Yes	primary	Yes	CHW	Yes	Yes	Positive
146	8	20	Male	Yes	primary	Yes	CHW	Yes	Yes	Negative
147	8	17	Female	Yes	primary	Yes	CHW	No	Yes	Negative
148	9	70	Male	Yes	primary	Yes	CHW	Yes	Yes	Negative
149	9	7	Female	Yes	primary	Yes	teacher	No	Yes	Negative
150	9	15	Female	Yes	primary	Yes	CHW	Yes	Yes	Negative
151	9	35	Male	Yes	primary	Yes	CHW	No	Yes	Positive
152	9	10	Male	Yes	primary	Yes	teacher	Yes	Yes	Negative
153	9	10	Female	Yes	primary	Yes	teacher	Yes	Yes	Negative
154	9	10	Male	Yes	primary	Yes	teacher	Yes	Yes	Negative
155	9	16	Male	Yes	primary	No		No	Yes	Negative
156	9	35	Male	Yes	primary	Yes	CHW	Yes	Yes	Negative
157	9	57	Male	Yes	primary	Yes	CHW	Yes	Yes	Negative
158	9	18	Male	Yes	primary	Yes	CHW	No	No	Negative
159	9	22	Female	No		Yes	CHW	Yes	Yes	Negative
160	9	6	Female	No		No		No	Yes	Negative
161	9	52	Female	Yes	primary	Yes	CHW	Yes	Yes	Negative
162	9	20	Male	Yes	primary	Yes	CHW	Yes	Yes	Negative
163	9	10	Male	Yes	primary	Yes	teacher	Yes	Yes	Negative
164	9	11	Male	Yes	primary	Yes	teacher	Yes	Yes	Negative
165	9	11	Female	Yes	primary	Yes	teacher	Yes	Yes	Negative
166	10	42	Female	Yes	primary	No		No	Yes	Negative
167	10	62	Male	Yes	primary	Yes	CHW	Yes	Yes	Negative
168	10	25	Male	Yes	primary	Yes	CHW	No	Yes	Negative
169	10	24	Male	Yes	primary	Yes	CHW	Yes	Yes	Negative
170	10	27	Male	Yes	primary	Yes	CHW	Yes	Yes	Negative
171	10	26	Male	Yes	primary	Yes	CHW	Yes	Yes	Negative
172	10	54	Male	Yes	primary	Yes	CHW	Yes	Yes	Negative
173	10	17	Male	Yes	secondary	Yes	CHW	No	Yes	Positive
174	10	21	Male	Yes	primary	Yes	CHW	Yes	Yes	Negative
175	10	6	Female	Yes	primary	Yes	CHW	Yes	Yes	Negative
176	10	15	Female	Yes	primary	Yes	CHW	No	Yes	Negative
177	10	14	Female	Yes	primary	Yes	CHW	No	Yes	Negative
178	10	26	Female	Yes	primary	No		No	Yes	Positive
179	10	52	Male	Yes	secondary	Yes	newspaper or panflet	Yes	Yes	Negative
180	10	20	Female	Yes	primary	Yes	CHW	No	Yes	Negative
181	10	42	Male	Yes	primary	Yes	CHW	Yes	Yes	Negative
182	10	30	Female	No		Yes	CHW	Yes	Yes	Positive
183	11	61	Male	Yes	primary	Yes	CHW	Yes	Yes	Negative
184	11	18	Male	Yes	primary	Yes	CHW	Yes	Yes	Negative
185	11	25	Female	No		Yes	CHW	Yes	Yes	Negative
186	11	30	Female	No		Yes	CHW	Yes	Yes	Negative
187	11	10	Male	Yes	primary	Yes	teacher	Yes	Yes	Negative
188	11	55	Male	No		Yes	CHW	No	Yes	Negative
189	11	32	Male	Yes	primary	Yes	CHW	No	Yes	Negative
190	11	7	Female	Yes	primary	Yes	teacher	Yes	Yes	Negative
191	11	6	Male	Yes	primary	Yes	teacher	Yes	Yes	Negative
192	11	48	Male	Yes	primary	Yes	CHW	Yes	Yes	Negative
193	11	25	Female	No		Yes	CHW	Yes	No	Positive
194	11	12	Female	Yes	primary	Yes	CHW	No	No	Negative
195	11	59	Male	Yes	primary	Yes	health staff	Yes	Yes	Positive
196	11	9	Male	Yes	primary	Yes	teacher	Yes	Yes	Negative
197	11	10	Female	Yes	primary	Yes	teacher	Yes	Yes	Negative
198	11	44	Male	Yes	primary	Yes	CHW	Yes	Yes	Negative
199	11	6	Female	Yes	primary	Yes	teacher	Yes	Yes	Negative
200	11	6	Female	Yes	primary	Yes	teacher	Yes	Yes	Negative
201	12	39	Male	Yes	primary	Yes	CHW	Yes	Yes	Positive
202	12	37	Female	Yes	primary	Yes	CHW	No	Yes	Negative
203	12	46	Female	Yes	primary	Yes	CHW	Yes	Yes	Negative
204	12	41	Male	Yes	primary	Yes	CHW	Yes	Yes	Negative
205	12	37	Male	Yes	secondary	Yes	CHW	Yes	Yes	Negative
206	12	22	Male	Yes	primary	Yes	CHW	Yes	Yes	Positive
207	12	72	Male	Yes	primary	Yes	CHW	Yes	Yes	Positive
208	12	60	Female	No		Yes	CHW	Yes	Yes	Positive
209	12	22	Female	Yes	primary	Yes	CHW	Yes	Yes	Negative
210	12	31	Male	Yes	primary	Yes	CHW	Yes	Yes	Negative
211	12	20	Female	Yes	secondary	Yes	CHW	Yes	Yes	Negative
212	12	18	Female	Yes	primary	Yes	CHW	Yes	Yes	Negative
213	12	23	Female	Yes	secondary	Yes	CHW	No	Yes	Negative
214	12	35	Female	Yes	primary	Yes	CHW	Yes	Yes	Negative
215	12	30	Male	Yes	primary	Yes	CHW	Yes	Yes	Positive
216	12	21	Male	Yes	primary	Yes	CHW	No	No	Negative
217	13	13	Male	Yes	primary	Yes	CHW	Yes	Yes	Negative
218	13	25	Female	Yes	primary	Yes	CHW	Yes	Yes	Negative
219	13	8	Male	Yes	primary	Yes	CHW	Yes	Yes	Negative
220	13	28	Female	Yes	primary	Yes	friend or neighbor	Yes	Yes	Positive
221	13	16	Female	Yes	secondary	No		Yes	Yes	Negative
222	13	8	Male	Yes	primary	Yes	health staff,CHW	Yes	Yes	Negative
223	13	40	Male	No		Yes	health staff,CHW	Yes	No	Positive
224	13	54	Male	Yes	primary	Yes	friend or neighbor,CHW	Yes	No	Negative
225	13	54	Female	Yes	primary	Yes	CHW	Yes	Yes	Negative
226	13	53	Male	Yes	primary	Yes	health staff	Yes	No	Negative
227	13	7	Male	Yes	primary	Yes	CHW	No	No	Negative
228	13	16	Male	Yes	secondary	Yes	friend or neighbor,CHW	Yes	Yes	Negative
229	13	60	Female	Yes	primary	No		No	Yes	Positive
230	13	55	Male	Yes	secondary	Yes	health staff,CHW	Yes	Yes	Negative
231	13	5	Female	No		Yes	CHW	Yes	Yes	Negative
232	13	60	Female	Yes	primary	Yes	CHW	Yes	Yes	Negative
233	13	25	Female	Yes	primary	No		No	No	Negative
234	13	50	Male	Yes	primary	Yes	CHW	Yes	Yes	Negative
235	14	67	Male	Yes	primary	No		No	No	Negative
236	14	25	Male	Yes	primary	Yes	health staff,CHW	No	No	Negative
237	14	44	Male	Yes	primary	Yes	radio,CHW	Yes	No	Negative
238	14	20	Male	Yes	primary	Yes	CHW	Yes	No	Negative
239	14	50	Female	Yes	primary	Yes	CHW	Yes	No	Negative
240	14	19	Female	Yes	primary	No		No	No	Negative
241	14	40	Female	Yes	primary	Yes	CHW	Yes	No	Negative
242	14	7	Female	Yes	primary	Yes	CHW	Yes	No	Negative
243	14	32	Male	Yes	primary	Yes	CHW	No	No	Negative
244	14	14	Male	Yes	primary	No		Yes	No	Negative
245	14	14	Female	Yes	primary	No		Yes	No	Negative
246	14	17	Female	Yes	primary	Yes	teacher	Yes	No	Negative
247	14	14	Female	Yes	primary	No		No	No	Negative
248	14	13	Female	No		Yes	teacher	Yes	No	Negative
249	14	10	Female	Yes	primary	Yes	teacher	Yes	No	Negative
250	14	65	Male	No		Yes	CHW	Yes	No	Negative
251	14	40	Male	No		Yes	CHW	No	No	Negative
252	14	7	Male	Yes	primary	Yes	CHW	Yes	No	Negative
253	15	30	Male	No		No		Yes	No	Positive
254	15	33	Male	No		Yes	CHW	Yes	No	Negative
255	15	8	Male	Yes	primary	Yes	CHW	No	No	Negative
256	15	59	Female	No		Yes	CHW	No	No	Negative
257	15	30	Female	No		Yes	CHW	No	Yes	Negative
258	15	20	Female	No		Yes	CHW	No	No	Negative
259	15	41	Male	Yes	secondary	Yes	CHW	Yes	No	Negative
260	15	28	Female	No		No		No	Yes	Negative
261	15	28	Male	No		Yes	CHW	Yes	No	Negative
262	15	6	Male	Yes	primary	Yes	CHW	No	No	Negative
263	15	21	Female	Yes	primary	Yes	CHW	Yes	Yes	Negative
264	15	30	Male	No		Yes	CHW	Yes	Yes	Negative
265	15	37	Female	No		No		No	Yes	Negative
266	15	14	Male	Yes	primary	Yes	teacher	Yes	Yes	Negative
267	15	7	Male	Yes	primary	Yes	teacher	Yes	Yes	Positive
268	15	18	Male	Yes	primary	Yes	friend or neighbor	Yes	No	Negative
269	15	23	Male	Yes	primary	Yes	CHW	Yes	No	Negative
270	15	12	Female	Yes	primary	Yes	teacher	Yes	Yes	Negative
271	16	70	Female	Yes	primary	Yes	health staff	No	Yes	Negative
272	16	16	Male	Yes	primary	Yes	teacher	No	No	Negative
273	16	18	Female	Yes	primary	Yes	teacher	No	Yes	Negative
274	16	25	Male	Yes	primary	Yes	CHW	Yes	Yes	Negative
275	16	36	Male	No		Yes	CHW	Yes	Yes	Negative
276	16	77	Male	Yes	primary	Yes	CHW	Yes	Yes	Negative
277	16	44	Female	Yes	primary	Yes	CHW	Yes	Yes	Negative
278	16	98	Male	Yes	primary	Yes	CHW	Yes	Yes	Positive
279	16	39	Male	Yes	primary	Yes	CHW	No	Yes	Negative
280	16	51	Male	Yes	secondary	Yes	health staff	Yes	Yes	Negative
281	16	44	Male	Yes	primary	Yes	health staff	Yes	Yes	Negative
282	16	14	Male	Yes	primary	Yes	CHW	No	Yes	Negative
283	16	12	Male	Yes	primary	Yes	CHW	Yes	Yes	Negative
284	16	17	Female	Yes	secondary	Yes	CHW	No	Yes	Negative
285	16	17	Female	Yes	primary	No		No	Yes	Negative
286	16	18	Female	Yes	primary	No		No	Yes	Negative
287	16	37	Male	Yes	primary	Yes	CHW	Yes	Yes	Positive
288	16	16	Female	Yes	secondary	Yes	CHW	Yes	Yes	Negative
289	17	38	Male	No		Yes	health staff	Yes	No	Negative
290	17	40	Female	No		Yes	friend or neighbor	Yes	Yes	Positive
291	17	61	Female	Yes	primary	Yes	CHW	No	No	Positive
292	17	50	Female	Yes	primary	Yes	CHW	No	No	Negative
293	17	52	Male	Yes	secondary	No		No	Yes	Positive
294	17	36	Male	No		Yes	health staff	No	No	Negative
295	17	80	Female	No		No		No	No	Positive
296	17	50	Female	No		Yes	health staff	Yes	Yes	Negative
297	17	31	Female	No		Yes	CHW	Yes	Yes	Negative
298	17	34	Female	Yes	secondary	Yes	CHW	Yes	Yes	Negative
299	17	15	Female	No		Yes	friend or neighbor	Yes	Yes	Negative
300	17	16	Female	Yes	primary	No		No	No	Negative
301	17	15	Female	Yes	primary	No		No	Yes	Negative
302	17	44	Female	No		Yes	CHW	Yes	Yes	Negative
303	17	13	Female	Yes	primary	Yes	teacher	Yes	Yes	Negative
304	17	13	Female	No		No		No	Yes	Negative
305	17	13	Female	No		No		No	Yes	Negative
306	17	16	Female	Yes	primary	No		No	Yes	Negative
307	18	46	Male	No		Yes	CHW	Yes	Yes	Positive
308	18	26	Male	Yes	primary	Yes	CHW	No	Yes	Negative
309	18	25	Male	Yes	primary	Yes	CHW	Yes	Yes	Negative
310	18	20	Male	Yes	primary	Yes	CHW	Yes	Yes	Negative
311	18	18	Male	Yes	primary	Yes	CHW	Yes	Yes	Negative
312	18	25	Male	Yes	primary	Yes	CHW	Yes	Yes	Negative
313	18	17	Male	Yes	primary	Yes	CHW	Yes	Yes	Negative
314	18	51	Male	Yes	primary	Yes	CHW	Yes	Yes	Negative
315	18	16	Male	Yes	primary	No		No	Yes	Negative
316	18	18	Male	Yes	primary	No		No	Yes	Negative
317	18	46	Female	Yes	primary	Yes	CHW	No	Yes	Negative
318	18	21	Female	Yes	secondary	No		No	Yes	Negative
319	18	10	Female	Yes	primary	No		No	Yes	Negative
320	18	30	Female	Yes	primary	Yes	CHW	No	Yes	Negative
321	18	16	Female	Yes	primary	Yes	CHW	Yes	Yes	Negative
322	18	57	Female	Yes	primary	Yes	health staff	Yes	Yes	Negative
323	18	42	Male	Yes	primary	Yes	CHW,teacher	No	Yes	Negative
324	18	77	Female	Yes	primary	Yes	health staff	No	Yes	Positive
325	19	56	Male	Yes	primary	Yes	CHW	Yes	No	Positive
326	19	38	Male	No		Yes	friend or neighbor	No	Yes	Negative
327	19	54	Male	Yes	primary	Yes	CHW	Yes	Yes	Negative
328	19	40	Male	Yes	primary	Yes	CHW	Yes	Yes	Negative
329	19	61	Male	Yes	primary	Yes	CHW	Yes	Yes	Positive
330	19	59	Male	Yes	secondary	Yes	CHW	No	Yes	Positive
331	19	55	Male	Yes	university	Yes	CHW	Yes	Yes	Positive
332	19	52	Female	Yes	primary	Yes	friend or neighbor,CHW	Yes	Yes	Negative
333	19	30	Male	Yes	primary	Yes	CHW	Yes	Yes	Positive
334	19	45	Female	No		Yes	CHW	Yes	Yes	Negative
335	19	23	Female	Yes	primary	Yes	CHW	No	Yes	Negative
336	19	25	Male	No		Yes	CHW	Yes	Yes	Negative
337	19	36	Male	No		Yes	CHW	Yes	Yes	Positive
338	19	20	Male	No		Yes	CHW	Yes	Yes	Positive
339	19	31	Male	No		Yes	CHW	Yes	Yes	Negative
340	19	41	Female	Yes	primary	Yes	CHW	Yes	Yes	Negative
341	19	24	Female	Yes	primary	Yes	CHW	Yes	Yes	Negative
342	19	18	Male	Yes	primary	Yes	CHW	Yes	Yes	Negative
343	19	24	Male	Yes	primary	Yes	CHW	Yes	No	Negative
344	19	49	Female	Yes	primary	Yes	friend or neighbor	No	Yes	Negative
345	20	54	Male	Yes	primary	Yes	CHW	No	Yes	Positive
346	20	38	Male	Yes	primary	Yes	CHW	Yes	Yes	Positive
347	20	55	Male	Yes	primary	Yes	CHW	No	Yes	Positive
348	20	10	Female	Yes	primary	Yes	teacher	Yes	Yes	Negative
349	20	38	Male	Yes	primary	No		No	Yes	Negative
350	20	65	Male	Yes	primary	Yes	friend or neighbor	No	Yes	Negative
351	20	44	Female	No		Yes	CHW	No	Yes	Negative
352	20	37	Male	Yes	primary	Yes	CHW	No	No	Negative
353	20	53	Male	Yes	primary	Yes	CHW	Yes	Yes	Positive
354	20	53	Male	No		No		No	No	Positive
355	20	16	Male	Yes	primary	No		No	Yes	Negative
356	20	38	Female	Yes	primary	Yes	CHW	Yes	Yes	Negative
357	20	69	Female	Yes	primary	Yes	CHW	No	Yes	Negative
358	20	46	Female	Yes	university	Yes	health staff,CHW	No	Yes	Negative
359	20	40	Male	No		Yes	CHW	No	Yes	Negative
360	20	19	Female	No		Yes	CHW	Yes	Yes	Positive
361	20	30	Female	No		Yes	CHW	Yes	Yes	Negative
362	20	56	Female	No		Yes	CHW	Yes	Yes	Negative
363	20	44	Male	Yes	primary	Yes	CHW	No	Yes	Negative
364	20	15	Female	Yes	primary	Yes	CHW	Yes	Yes	Negative
365	20	35	Female	Yes	primary	Yes	CHW	Yes	Yes	Negative
366	21	55	Male	No		Yes	CHW	No	Yes	Positive
367	21	69	Male	Yes	primary	Yes	CHW	Yes	Yes	Negative
368	21	56	Male	Yes	primary	Yes	CHW	Yes	Yes	Negative
369	21	34	Male	No		Yes	CHW	Yes	Yes	Positive
370	21	10	Female	Yes	primary	Yes	CHW	Yes	Yes	Negative
371	21	18	Male	Yes	primary	Yes	CHW	Yes	Yes	Negative
372	21	28	Female	No		No		No	Yes	Negative
373	21	25	Female	Yes	primary	Yes	CHW	Yes	Yes	Negative
374	21	52	Male	Yes	secondary	Yes	CHW	Yes	Yes	Negative
375	21	33	Male	Yes	primary	Yes	CHW	No	Yes	Negative
376	21	47	Female	Yes	primary	Yes	CHW	No	Yes	Negative
377	21	30	Female	Yes	secondary	Yes	CHW	Yes	Yes	Negative
378	21	11	Male	Yes	primary	Yes	teacher	Yes	Yes	Negative
379	21	15	Female	Yes	secondary	Yes	health staff	No	Yes	Negative
380	21	14	Female	Yes	secondary	Yes	teacher	No	Yes	Negative
381	21	10	Female	Yes	primary	Yes	teacher	Yes	Yes	Negative
382	21	14	Female	Yes	primary	Yes	teacher	Yes	Yes	Negative
383	21	38	Female	Yes	primary	Yes	CHW	No	Yes	Negative
384	22	19	Male	Yes	primary	Yes	CHW	No	No	Negative
385	22	41	Male	Yes	primary	No		No	No	Negative
386	22	8	Male	Yes	primary	No		No	No	Negative
387	22	59	Male	Yes	primary	No		Yes	Yes	Negative
388	22	23	Male	Yes	primary	Yes	CHW	Yes	Yes	Negative
389	22	14	Female	Yes	primary	No		Yes	Yes	Negative
390	22	19	Male	Yes	primary	No		No	Yes	Negative
391	22	12	Male	Yes	primary	No		Yes	Yes	Negative
392	22	40	Female	Yes	primary	Yes	CHW	No	Yes	Positive
393	22	58	Male	Yes	primary	Yes	CHW	Yes	Yes	Negative
394	22	14	Male	Yes	primary	No		Yes	Yes	Negative
395	22	13	Female	Yes	primary	Yes	CHW	Yes	Yes	Negative
396	22	44	Male	Yes	primary	Yes	CHW	Yes	Yes	Negative
397	22	7	Female	Yes	primary	No		No	No	Negative
398	22	14	Male	Yes	primary	Yes	CHW	Yes	Yes	Negative
399	22	19	Female	Yes	primary	No		Yes	Yes	Negative
400	22	60	Male	Yes	primary	Yes	CHW	Yes	Yes	Negative
401	22	39	Male	No		No		No	Yes	Negative
402	23	17	Female	Yes	primary	Yes	CHW	Yes	Yes	Negative
403	23	19	Male	Yes	primary	No		No	Yes	Negative
404	23	70	Male	Yes	primary	No		No	Yes	Negative
405	23	43	Female	Yes	primary	Yes	CHW	Yes	Yes	Negative
406	23	16	Female	Yes	primary	No		Yes	Yes	Negative
407	23	56	Female	Yes	primary	No		Yes	Yes	Negative
408	23	41	Female	Yes	primary	No		Yes	Yes	Negative
409	23	28	Female	Yes	primary	No		Yes	Yes	Negative
410	23	48	Female	Yes	primary	No		Yes	Yes	Negative
411	23	8	Female	Yes	primary	No		Yes	Yes	Negative
412	23	58	Male	Yes	primary	Yes	CHW	Yes	Yes	Negative
413	23	45	Female	Yes	primary	No		Yes	Yes	Negative
414	23	50	Male	Yes	primary	Yes	CHW	Yes	Yes	Negative
415	23	48	Female	Yes	primary	No		No	Yes	Negative
416	23	56	Female	Yes	primary	No		Yes	Yes	Negative
417	23	15	Female	Yes	primary	Yes	health staff	Yes	Yes	Negative
418	23	31	Male	Yes	primary	No		Yes	Yes	Negative
419	23	38	Female	Yes	primary	Yes	health staff	Yes	Yes	Negative
420	24	26	Male	No		No		Yes	Yes	Negative
421	24	20	Male	Yes	primary	No		No	Yes	Negative
422	24	38	Male	No		No		No	Yes	Positive
423	24	18	Male	Yes	primary	No		No	Yes	Negative
424	24	52	Male	Yes	primary	No		No	Yes	Negative
425	24	18	Male	Yes	primary	No		No	Yes	Negative
426	24	30	Male	No		No		Yes	Yes	Negative
427	24	25	Male	No		No		Yes	Yes	Positive
428	24	52	Male	Yes	primary	No		Yes	Yes	Positive
429	24	20	Male	Yes	primary	No		Yes	No	Negative
430	24	50	Male	Yes	primary	No		No	No	Positive
431	24	30	Male	No		No		No	Yes	Negative
432	24	46	Male	Yes	primary	No		No	Yes	Positive
433	24	47	Male	Yes	primary	No		No	Yes	Positive
434	24	20	Male	No		No		No	Yes	Positive
435	24	38	Male	No		Yes	health staff	No	Yes	Negative
436	24	22	Male	Yes	primary	No		No	No	Negative
437	24	36	Male	Yes	primary	Yes	CHW	Yes	Yes	Negative
438	25	12	Male	Yes	primary	No		Yes	Yes	Negative
439	25	64	Female	No		No		Yes	Yes	Negative
440	25	10	Male	Yes	primary	No		No	Yes	Negative
441	25	36	Female	No		No		Yes	Yes	Negative
442	25	45	Male	Yes	primary	Yes	CHW	Yes	Yes	Negative
443	25	57	Male	Yes	primary	No		Yes	Yes	Positive
444	25	25	Female	No		No		Yes	Yes	Negative
445	25	18	Male	Yes	primary	Yes	health staff	No	Yes	Negative
446	25	58	Female	No		No		Yes	Yes	Negative
447	25	15	Female	Yes	primary	No		Yes	Yes	Negative
448	25	15	Male	Yes	primary	No		Yes	Yes	Positive
449	25	66	Female	Yes	primary	No		Yes	Yes	Negative
450	25	16	Female	Yes	primary	No		No	No	Negative
451	25	8	Female	Yes	primary	No		Yes	Yes	Negative
452	25	22	Female	Yes	primary	No		Yes	Yes	Negative
453	25	24	Male	Yes	primary	Yes	health staff	No	Yes	Negative
454	25	26	Female	Yes	primary	No		No	Yes	Positive
455	25	32	Male	No		No		No	No	Negative
456	26	37	Female	Yes	primary	Yes	health staff	Yes	Yes	Negative
457	26	18	Male	Yes	primary	No		Yes	Yes	Negative
458	26	31	Female	Yes	primary	Yes	CHW	Yes	Yes	Negative
459	26	20	Female	Yes	primary	No		No	Yes	Negative
460	26	46	Female	Yes	primary	Yes	CHW	No	Yes	Positive
461	26	28	Male	Yes	primary	No		Yes	Yes	Negative
462	26	41	Male	Yes	primary	Yes	CHW	Yes	Yes	Negative
463	26	46	Female	No		No		No	Yes	Negative
464	26	10	Male	Yes	primary	Yes	CHW	Yes	Yes	Negative
465	26	11	Female	Yes	primary	Yes	CHW	Yes	Yes	Negative
466	26	40	Female	Yes	primary	No		Yes	Yes	Positive
467	26	14	Female	Yes	primary	Yes	CHW	Yes	Yes	Negative
468	26	19	Female	Yes	primary	Yes	CHW	Yes	Yes	Negative
469	26	18	Male	Yes	primary	No		No	Yes	Negative
470	26	28	Male	No		Yes	CHW	No	Yes	Negative
471	26	34	Male	Yes	primary	Yes	CHW	Yes	Yes	Positive
472	26	20	Male	Yes	primary	Yes	CHW	Yes	Yes	Negative
473	26	9	Female	Yes	primary	No		Yes	Yes	Negative
474	27	12	Male	Yes	primary	No		No	Yes	Negative
475	27	21	Female	Yes	primary	No		Yes	Yes	Negative
476	27	12	Male	Yes	primary	No		Yes	Yes	Negative
477	27	50	Female	Yes	primary	Yes	CHW	Yes	Yes	Negative
478	27	14	Female	Yes	primary	No		No	Yes	Negative
479	27	64	Male	Yes	secondary	No		Yes	Yes	Negative
480	27	30	Male	Yes	primary	No		Yes	Yes	Negative
481	27	28	Male	Yes	primary	No		No	Yes	Negative
482	27	22	Female	Yes	primary	No		Yes	Yes	Negative
483	27	42	Male	Yes	primary	Yes	CHW	Yes	Yes	Negative
484	27	15	Female	Yes	primary	No		Yes	Yes	Negative
485	27	5	Male	Yes	primary	No		No	Yes	Negative
486	27	31	Male	Yes	primary	No		Yes	No	Negative
487	27	5	Male	Yes	primary	No		No	Yes	Negative
488	27	10	Male	Yes	primary	No		Yes	Yes	Negative
489	27	14	Male	Yes	primary	No		Yes	Yes	Negative
490	27	78	Male	No		No		Yes	Yes	Negative
491	27	42	Male	No		No		Yes	Yes	Negative
492	28	12	Male	Yes	primary	No		No	No	Negative
493	28	22	Male	Yes	primary	No		Yes	Yes	Negative
494	28	18	Female	Yes	primary	No		Yes	Yes	Negative
495	28	65	Male	No		No		Yes	Yes	Negative
496	28	5	Male	Yes	primary	No		Yes	Yes	Negative
497	28	32	Male	Yes	secondary	No		Yes	Yes	Positive
498	28	36	Male	Yes	primary	Yes	health staff	Yes	Yes	Negative
499	28	66	Female	Yes	primary	No		No	Yes	Negative
500	28	28	Female	Yes	primary	No		Yes	Yes	Positive
501	28	18	Male	Yes	primary	No		Yes	Yes	Negative
502	28	19	Male	Yes	primary	No		Yes	Yes	Negative
503	28	42	Female	No		No		Yes	Yes	Negative
504	28	54	Male	Yes	primary	No		Yes	Yes	Negative
505	28	49	Male	Yes	primary	No		Yes	Yes	Negative
506	28	95	Male	Yes	primary	No		No	No	Negative
507	28	20	Male	Yes	primary	No		Yes	Yes	Negative
508	28	45	Female	No		No		Yes	Yes	Negative
509	28	18	Female	Yes	primary	No		Yes	Yes	Positive
510	29	45	Male	Yes	primary	No		Yes	No	Negative
511	29	22	Male	Yes	primary	No		No	No	Negative
512	29	35	Female	Yes	primary	No		Yes	Yes	Negative
513	29	25	Female	Yes	university	Yes	CHW	Yes	Yes	Negative
514	29	50	Female	Yes	secondary	Yes	CHW	Yes	Yes	Negative
515	29	18	Male	Yes	primary	No		No	Yes	Negative
516	29	71	Female	Yes	primary	No		Yes	Yes	Negative
517	29	32	Female	Yes	primary	No		Yes	Yes	Negative
518	29	26	Male	Yes	primary	No		Yes	Yes	Negative
519	29	72	Female	No		No		No	No	Negative
520	29	18	Female	Yes	primary	No		No	Yes	Negative
521	29	22	Male	Yes	secondary	Yes	health staff	Yes	No	Negative
522	29	14	Female	Yes	secondary	No		Yes	Yes	Negative
523	29	60	Male	Yes	primary	No		Yes	Yes	Negative
524	29	40	Female	Yes	primary	No		Yes	Yes	Negative
525	29	19	Female	Yes	primary	No		No	No	Negative
526	29	20	Female	Yes	primary	No		No	Yes	Negative
527	29	17	Female	Yes	secondary	Yes	health staff	Yes	Yes	Negative
528	30	51	Male	Yes	secondary	No		Yes	Yes	Negative
529	30	33	Female	Yes	primary	No		Yes	Yes	Negative
530	30	60	Female	Yes	primary	No		Yes	Yes	Positive
531	30	29	Female	Yes	primary	No		Yes	Yes	Negative
532	30	18	Female	Yes	primary	No		Yes	Yes	Positive
533	30	35	Female	Yes	primary	No		Yes	Yes	Negative
534	30	51	Male	Yes	primary	No		Yes	Yes	Negative
535	30	22	Female	Yes	primary	Yes	health staff,CHW	Yes	Yes	Negative
536	30	48	Male	Yes	primary	No		Yes	Yes	Negative
537	30	12	Male	Yes	primary	No		Yes	Yes	Negative
538	30	50	Female	Yes	primary	No		No	Yes	Negative
539	30	50	Female	Yes	primary	No		No	Yes	Positive
540	30	30	Female	No		No		Yes	Yes	Positive
541	30	8	Female	Yes	primary	No		Yes	Yes	Negative
542	30	30	Female	No		No		Yes	Yes	Negative
543	30	25	Female	Yes	primary	No		Yes	Yes	Negative
544	30	18	Female	Yes	primary	No		Yes	Yes	Negative
545	30	52	Male	Yes	primary	Yes	CHW	Yes	Yes	Negative

## Sheet: TAS MAMAVO
ID	District	Code school	Sex	Age	Class	FTS Result
1	Mananjary	18	Male	7	CP1	Negative
2	Mananjary	18	Male	7	CP1	Negative
3	Mananjary	18	Male	7	CP1	Negative
4	Mananjary	18	Male	7	CP1	Negative
5	Mananjary	18	Male	7	CP1	Negative
6	Mananjary	18	Male	7	CP1	Negative
7	Mananjary	18	Male	6	CP1	Negative
8	Mananjary	18	Male	7	CP1	Negative
9	Mananjary	18	Male	6	CP1	Negative
10	Mananjary	18	Male	7	CP2	Negative
11	Mananjary	18	Male	7	CP1	Negative
12	Mananjary	18	Male	6	CP1	Negative
13	Mananjary	18	Male	6	CP1	Negative
14	Mananjary	18	Male	7	CP1	Negative
15	Mananjary	18	Male	6	CP1	Negative
16	Mananjary	18	Male	6	CP1	Negative
17	Mananjary	18	Male	6	CP1	Negative
18	Mananjary	18	Male	6	CP1	Negative
19	Mananjary	18	Male	7	CP1	Negative
20	Mananjary	18	Male	6	CP1	Negative
21	Mananjary	18	Male	6	CP1	Negative
22	Mananjary	18	Male	7	CP2	Negative
23	Mananjary	18	Male	7	CP2	Negative
24	Mananjary	18	Male	7	CP2	Negative
25	Mananjary	18	Male	7	CP2	Negative
26	Mananjary	18	Male	7	CP2	Negative
27	Mananjary	18	Male	7	CP2	Negative
28	Mananjary	18	Male	7	CP2	Negative
29	Mananjary	18	Male	7	CP2	Negative
30	Mananjary	18	Male	7	CP2	Negative
31	Mananjary	18	Male	7	CP2	Negative
32	Mananjary	18	Female	7	CP2	Negative
33	Mananjary	18	Female	7	CP2	Negative
34	Mananjary	18	Female	7	CP2	Negative
35	Mananjary	18	Female	7	CP2	Negative
36	Mananjary	18	Male	7	CP2	Negative
37	Mananjary	18	Male	7	CP2	Negative
38	Mananjary	18	Male	7	CP2	Negative
39	Mananjary	18	Male	7	CP2	Negative
40	Mananjary	18	Male	7	CP2	Negative
41	Mananjary	18	Male	6	CP1	Negative
42	Mananjary	18	Female	6	CP1	Negative
43	Mananjary	18	Female	6	CP1	Negative
44	Mananjary	18	Female	6	CP1	Negative
45	Mananjary	18	Female	7	CP1	Negative
46	Mananjary	18	Female	7	CP2	Negative
47	Mananjary	18	Female	6	CP1	Negative
48	Mananjary	18	Female	6	CP1	Negative
49	Mananjary	18	Female	7	CP2	Negative
50	Mananjary	18	Female	7	CP2	Negative
51	Mananjary	18	Female	7	CP2	Negative
52	Mananjary	18	Female	7	CP2	Negative
53	Mananjary	18	Female	6	CP1	Negative
54	Mananjary	18	Female	6	CP1	Negative
55	Mananjary	18	Female	7	CP1	Negative
56	Mananjary	18	Female	6	CP1	Negative
57	Mananjary	18	Female	7	CP1	Negative
58	Mananjary	18	Female	7	CP1	Negative
59	Mananjary	18	Female	6	CP1	Negative
60	Mananjary	18	Female	6	CP1	Negative
61	Mananjary	58	Male	7	CP1	Negative
62	Mananjary	58	Male	7	CP1	Negative
63	Mananjary	58	Male	6	CP1	Negative
64	Mananjary	58	Female	6	CP1	Negative
65	Mananjary	58	Female	6	CP1	Negative
66	Mananjary	58	Male	6	CP1	Negative
67	Mananjary	58	Male	6	CP1	Negative
68	Mananjary	58	Female	7	CP1	Negative
69	Mananjary	58	Male	7	CP1	Negative
70	Mananjary	58	Female	7	CP1	Negative
71	Mananjary	58	Male	7	CP1	Negative
72	Mananjary	58	Female	6	CP1	Negative
73	Mananjary	58	Male	7	CP1	Negative
74	Mananjary	58	Female	6	CP1	Negative
75	Mananjary	58	Female	7	CP1	Negative
76	Mananjary	58	Female	7	CP1	Negative
77	Mananjary	58	Male	7	CP1	Negative
78	Mananjary	58	Female	7	CP1	Negative
79	Mananjary	58	Female	6	CP1	Negative
80	Mananjary	58	Female	7	CP1	Negative
81	Mananjary	58	Female	6	CP1	Negative
82	Mananjary	58	Female	6	CP1	Negative
83	Mananjary	58	Female	7	CP1	Negative
84	Mananjary	58	Female	6	CP1	Negative
85	Mananjary	58	Female	7	CP1	Negative
86	Mananjary	58	Female	7	CP1	Negative
87	Mananjary	58	Male	7	CP1	Negative
88	Mananjary	58	Female	6	CP1	Negative
89	Mananjary	58	Male	7	CP2	Negative
90	Mananjary	58	Male	7	CP1	Negative
91	Mananjary	58	Female	7	CP1	Negative
92	Mananjary	58	Male	7	CP1	Negative
93	Mananjary	58	Male	7	CP1	Negative
94	Mananjary	58	Male	7	CP1	Negative
95	Mananjary	58	Male	7	CP1	Negative
96	Mananjary	58	Male	6	CP1	Negative
97	Mananjary	58	Male	7	CP1	Negative
98	Mananjary	58	Female	6	CP1	Negative
99	Mananjary	58	Male	7	CP1	Negative
100	Mananjary	58	Male	7	CP1	Negative
101	Mananjary	99	Male	NA	CP2	Negative
102	Mananjary	99	Male	7	CP2	Negative
103	Mananjary	99	Male	7	CP2	Negative
104	Mananjary	99	Male	7	CP2	Negative
105	Mananjary	99	Male	7	CP2	Negative
106	Mananjary	99	Female	6	CP1	Negative
107	Mananjary	99	Female	6	CP1	Negative
108	Mananjary	99	Female	6	CP1	Negative
109	Mananjary	99	Female	6	CP1	Negative
110	Mananjary	99	Male	7	CP2	Negative
111	Mananjary	99	Female	7	CP2	Negative
112	Mananjary	99	Female	7	CP2	Negative
113	Mananjary	99	Female	7	CP2	Negative
114	Mananjary	99	Male	7	CP2	Negative
115	Mananjary	99	Male	7	CP2	Negative
116	Mananjary	99	Female	6	CP1	Negative
117	Mananjary	99	Female	6	CP1	Negative
118	Mananjary	99	Female	6	CP1	Negative
119	Mananjary	99	Male	6	CP1	Negative
120	Mananjary	99	Male	6	CP1	Negative
121	Mananjary	99	Female	6	CP1	Negative
122	Mananjary	99	Female	6	CP1	Negative
123	Mananjary	99	Female	6	CP1	Negative
124	Mananjary	99	Male	6	CP1	Negative
125	Mananjary	99	Male	6	CP1	Negative
126	Mananjary	99	Female	6	CP1	Negative
127	Mananjary	99	Female	6	CP1	Negative
128	Mananjary	99	Female	6	CP1	Negative
129	Mananjary	99	Male	6	CP1	Negative
130	Mananjary	99	Male	6	CP1	Negative
131	Mananjary	99	Male	6	CP1	Negative
132	Mananjary	99	Male	6	CP1	Negative
133	Mananjary	99	Male	6	CP1	Negative
134	Mananjary	99	Male	6	CP1	Negative
135	Mananjary	99	Male	6	CP1	Negative
136	Mananjary	99	Female	6	CP1	Negative
137	Mananjary	99	Female	6	CP1	Negative
138	Mananjary	99	Female	6	CP1	Negative
139	Mananjary	99	Female	6	CP1	Negative
140	Mananjary	99	Female	6	CP1	Negative
141	Mananjary	99	Female	6	CP1	Negative
142	Mananjary	99	Female	6	CP1	Negative
143	Mananjary	99	Male	7	CP1	Negative
144	Mananjary	99	Male	7	CP1	Negative
145	Mananjary	99	Female	6	CP1	Negative
146	Mananjary	99	Male	7	CP2	Negative
147	Mananjary	99	Female	6	CP1	Negative
148	Mananjary	99	Female	7	CP1	Negative
149	Mananjary	99	Female	6	CP1	Negative
150	Mananjary	99	Female	6	CP1	Negative
151	Mananjary	99	Male	6	CP1	Negative
152	Mananjary	99	Male	6	CP1	Negative
153	Mananjary	99	Female	7	CP2	Negative
154	Mananjary	99	Male	6	CP1	Negative
155	Mananjary	99	Female	7	CP2	Negative
156	Mananjary	99	Male	7	CP1	Negative
157	Mananjary	99	Female	7	CP2	Negative
158	Mananjary	99	Female	7	CP2	Negative
159	Mananjary	99	Female	7	CP2	Negative
160	Mananjary	99	Female	7	CP2	Negative
161	Mananjary	139	Female	6	CP1	Negative
162	Mananjary	139	Female	6	CP1	Negative
163	Mananjary	139	Female	6	CP1	Negative
164	Mananjary	139	Female	6	CP1	Negative
165	Mananjary	139	Female	6	CP1	Negative
166	Mananjary	139	Female	7	CP1	Negative
167	Mananjary	139	Female	7	CP1	Negative
168	Mananjary	139	Female	6	CP1	Negative
169	Mananjary	139	Female	6	CP1	Negative
170	Mananjary	139	Female	7	CP1	Negative
171	Mananjary	139	Male	6	CP1	Negative
172	Mananjary	139	Female	6	CP1	Negative
173	Mananjary	139	Male	6	CP1	Negative
174	Mananjary	139	Female	7	CP1	Negative
175	Mananjary	139	Female	7	CP1	Negative
176	Mananjary	139	Female	7	CP1	Negative
177	Mananjary	139	Female	7	CP1	Negative
178	Mananjary	139	Female	7	CP1	Negative
179	Mananjary	139	Female	6	CP1	Negative
180	Mananjary	139	Female	7	CP1	Negative
181	Mananjary	139	Male	6	CP1	Negative
182	Mananjary	139	Male	6	CP1	Negative
183	Mananjary	139	Male	6	CP1	Negative
184	Mananjary	139	Male	7	CP1	Negative
185	Mananjary	139	Male	7	CP1	Negative
186	Mananjary	139	Male	7	CP1	Negative
187	Mananjary	139	Male	6	CP1	Negative
188	Mananjary	139	Male	7	CP1	Negative
189	Mananjary	139	Male	7	CP1	Negative
190	Mananjary	139	Male	7	CP1	Negative
191	Mananjary	139	Female	7	CP2	Negative
192	Mananjary	139	Male	6	CP1	Negative
193	Mananjary	139	Male	7	CP1	Negative
194	Mananjary	139	Male	6	CP1	Negative
195	Mananjary	139	Male	7	CP1	Negative
196	Mananjary	139	Male	6	CP1	Negative
197	Mananjary	139	Female	7	CP2	Negative
198	Mananjary	139	Female	7	CP2	Negative
199	Mananjary	139	Male	7	CP1	Negative
200	Mananjary	139	Male	7	CP1	Negative
201	Mananjary	139	Female	7	CP2	Negative
202	Mananjary	139	Female	7	CP2	Negative
203	Mananjary	139	Female	7	CP2	Negative
204	Mananjary	139	Male	7	CP2	Negative
205	Mananjary	139	Female	7	CP2	Negative
206	Mananjary	139	Female	7	CP2	Negative
207	Mananjary	139	Female	7	CP2	Negative
208	Mananjary	139	Female	7	CP2	Negative
209	Mananjary	139	Female	7	CP2	Negative
210	Mananjary	139	Female	7	CP2	Negative
211	Mananjary	139	Male	7	CP2	Negative
212	Mananjary	139	Male	7	CP2	Negative
213	Mananjary	139	Male	7	CP2	Negative
214	Mananjary	139	Male	7	CP2	Negative
215	Mananjary	139	Male	7	CP2	Negative
216	Mananjary	139	Male	7	CP2	Negative
217	Mananjary	139	Male	7	CP2	Negative
218	Mananjary	139	Male	7	CP2	Negative
219	Mananjary	139	Male	7	CP2	Negative
220	Mananjary	139	Male	7	CP2	Negative
221	Mananjary	139	Male	7	CP2	Negative
222	Mananjary	139	Female	7	CP2	Negative
223	Mananjary	139	Female	7	CP2	Negative
224	Mananjary	139	Male	7	CP2	Negative
225	Mananjary	139	Male	7	CP2	Negative
226	Mananjary	139	Male	7	CP2	Negative
227	Mananjary	139	Male	7	CP2	Negative
228	Mananjary	139	Male	7	CP2	Negative
229	Mananjary	139	Male	7	CP2	Negative
230	Mananjary	139	Male	7	CP2	Negative
231	Mananjary	139	Male	7	CP2	Negative
232	Mananjary	139	Male	7	CP2	Negative
233	Mananjary	139	Male	7	CP2	Negative
234	Mananjary	139	Male	7	CP2	Negative
235	Mananjary	139	Male	7	CP2	Negative
236	Mananjary	139	Male	7	CP2	Negative
237	Mananjary	139	Male	7	CP2	Negative
238	Mananjary	139	Female	7	CP2	Negative
239	Mananjary	139	Female	7	CP2	Negative
240	Mananjary	139	Female	6	CP2	Negative
241	Mananjary	139	Female	6	CP1	Negative
242	Mananjary	139	Female	6	CP1	Negative
243	Mananjary	139	Male	7	CP2	Negative
244	Mananjary	139	Female	6	CP1	Negative
245	Mananjary	139	Female	6	CP1	Negative
246	Mananjary	139	Female	7	CP2	Negative
247	Mananjary	161	Female	6	CP1	Negative
248	Mananjary	161	Male	7	CP2	Negative
249	Mananjary	161	Female	6	CP1	Negative
250	Mananjary	161	Female	6	CP1	Negative
251	Mananjary	161	Male	7	CP2	Negative
252	Mananjary	161	Male	6	CP1	Negative
253	Mananjary	161	Male	7	CP1	Negative
254	Mananjary	161	Male	6	CP1	Negative
255	Mananjary	161	Male	6	CP1	Negative
256	Mananjary	161	Female	6	CP1	Negative
257	Mananjary	161	Female	6	CP1	Negative
258	Mananjary	161	Male	6	CP1	Negative
259	Mananjary	161	Female	6	CP1	Negative
260	Mananjary	161	Female	6	CP1	Negative
261	Mananjary	161	Male	7	CP2	Negative
262	Mananjary	161	Male	6	CP1	Negative
263	Mananjary	161	Male	6	CP1	Negative
264	Mananjary	161	Female	6	CP1	Negative
265	Mananjary	161	Female	6	CP1	Negative
266	Mananjary	161	Male	7	CP2	Negative
267	Mananjary	161	Female	7	CP2	Negative
268	Mananjary	161	Female	7	CP2	Negative
269	Mananjary	161	Female	7	CP2	Negative
270	Mananjary	161	Female	6	CP1	Negative
271	Mananjary	161	Female	7	CP2	Negative
272	Mananjary	161	Female	6	CP1	Negative
273	Mananjary	161	Female	7	CP2	Negative
274	Mananjary	161	Male	7	CP2	Negative
275	Mananjary	161	Male	7	CP2	Negative
276	Mananjary	161	Male	7	CP2	Negative
277	Mananjary	161	Male	7	CP2	Negative
278	Mananjary	161	Male	7	CP2	Negative
279	Mananjary	161	Male	7	CP2	Negative
280	Mananjary	161	Female	7	CP2	Negative
281	Mananjary	180	Male	7	CP2	Negative
282	Mananjary	180	Female	6	CP1	Negative
283	Mananjary	180	Male	6	CP1	Negative
284	Mananjary	180	Male	6	CP1	Negative
285	Mananjary	180	Male	6	CP1	Negative
286	Mananjary	180	Male	6	CP1	Negative
287	Mananjary	180	Male	6	CP1	Negative
288	Mananjary	180	Male	6	CP1	Negative
289	Mananjary	180	Male	6	CP1	Negative
290	Mananjary	180	Male	6	CP1	Negative
291	Mananjary	180	Male	6	CP1	Negative
292	Mananjary	180	Male	6	CP1	Negative
293	Mananjary	180	Male	6	CP1	Negative
294	Mananjary	180	Male	6	CP1	Negative
295	Mananjary	180	Male	6	CP1	Negative
296	Mananjary	180	Male	6	CP1	Negative
297	Mananjary	180	Female	6	CP1	Negative
298	Mananjary	180	Female	6	CP1	Negative
299	Mananjary	180	Female	6	CP1	Negative
300	Mananjary	180	Female	6	CP1	Negative
301	Mananjary	180	Female	6	CP1	Negative
302	Mananjary	180	Female	6	CP1	Negative
303	Mananjary	180	Female	6	CP1	Negative
304	Mananjary	180	Female	6	CP1	Negative
305	Mananjary	180	Female	6	CP1	Negative
306	Mananjary	180	Female	6	CP1	Negative
307	Mananjary	180	Female	6	CP1	Negative
308	Mananjary	180	Female	6	CP1	Negative
309	Mananjary	180	Female	6	CP1	Negative
310	Mananjary	180	Male	6	CP1	Negative
311	Mananjary	180	Female	6	CP1	Negative
312	Mananjary	180	Female	6	CP1	Negative
313	Mananjary	180	Female	6	CP1	Negative
314	Mananjary	180	Female	7	CP2	Negative
315	Mananjary	180	Female	7	CP2	Negative
316	Mananjary	180	Female	7	CP2	Negative
317	Mananjary	180	Female	7	CP2	Negative
318	Mananjary	180	Female	7	CP2	Negative
319	Mananjary	180	Female	7	CP2	Negative
320	Mananjary	180	Male	6	CP1	Negative
321	Mananjary	180	Female	7	CP2	Negative
322	Mananjary	180	Female	7	CP2	Negative
323	Mananjary	180	Male	7	CP2	Negative
324	Mananjary	180	Female	6	CP1	Negative
325	Mananjary	180	Male	7	CP2	Negative
326	Mananjary	180	Male	6	CP1	Negative
327	Mananjary	180	Male	7	CP2	Negative
328	Mananjary	180	Male	7	CP2	Negative
329	Mananjary	180	Male	7	CP2	Negative
330	Mananjary	180	Male	7	CP2	Negative
331	Mananjary	180	Male	7	CP2	Negative
332	Mananjary	180	Female	7	CP2	Negative
333	Mananjary	180	Female	7	CP2	Negative
334	Mananjary	180	Female	7	CP2	Negative
335	Mananjary	180	Female	7	CP2	Negative
336	Mananjary	220	Male	6	CP1	Negative
337	Mananjary	220	Male	6	CP1	Negative
338	Mananjary	220	Male	6	CP1	Negative
339	Mananjary	220	Male	6	CP1	Negative
340	Mananjary	220	Male	6	CP1	Negative
341	Mananjary	220	Male	6	CP1	Negative
342	Mananjary	220	Male	7	CP1	Negative
343	Mananjary	220	Male	7	CP1	Negative
344	Mananjary	220	Male	7	CP1	Negative
345	Mananjary	220	Male	7	CP1	Negative
346	Mananjary	220	Female	6	CP1	Negative
347	Mananjary	220	Female	6	CP1	Negative
348	Mananjary	220	Female	6	CP1	Negative
349	Mananjary	220	Female	6	CP1	Negative
350	Mananjary	220	Female	7	CP1	Negative
351	Mananjary	220	Female	7	CP1	Negative
352	Mananjary	220	Female	7	CP1	Negative
353	Mananjary	220	Female	6	CP1	Negative
354	Mananjary	220	Female	6	CP1	Negative
355	Mananjary	220	Female	6	CP1	Negative
356	Mananjary	220	Female	6	CP1	Negative
357	Mananjary	220	Female	7	CP2	Negative
358	Mananjary	220	Female	7	CP2	Negative
359	Mananjary	220	Female	7	CP2	Negative
360	Mananjary	220	Female	7	CP1	Negative
361	Mananjary	220	Female	7	CP2	Negative
362	Mananjary	220	Female	7	CP2	Negative
363	Mananjary	220	Female	7	CP2	Negative
364	Mananjary	220	Female	7	CP2	Negative
365	Mananjary	220	Female	7	CP1	Negative
366	Mananjary	220	Male	6	CP1	Negative
367	Mananjary	220	Male	6	CP1	Negative
368	Mananjary	220	Male	7	CP2	Negative
369	Mananjary	220	Male	7	CP1	Negative
370	Mananjary	220	Male	7	CP1	Negative
371	Mananjary	220	Female	7	CP2	Negative
372	Mananjary	220	Female	7	CP2	Negative
373	Mananjary	220	Female	7	CP2	Negative
374	Mananjary	220	Female	7	CP2	Negative
375	Mananjary	220	Female	7	CP2	Negative
376	Mananjary	220	Male	6	CP1	Negative
377	Mananjary	220	Male	6	CP1	Negative
378	Mananjary	220	Male	6	CP1	Negative
379	Mananjary	220	Male	6	CP1	Negative
380	Mananjary	220	Female	6	CP1	Negative
381	Mananjary	220	Female	6	CP1	Negative
382	Mananjary	220	Female	6	CP1	Negative
383	Mananjary	220	Female	6	CP1	Negative
384	Mananjary	220	Female	7	CP1	Negative
385	Mananjary	220	Female	6	CP1	Negative
386	Mananjary	220	Female	7	CP2	Negative
387	Mananjary	220	Female	7	CP2	Negative
388	Mananjary	220	Female	6	CP2	Negative
389	Mananjary	220	Female	7	CP2	Negative
390	Mananjary	220	Female	7	CP2	Negative
391	Mananjary	220	Male	6	CP1	Negative
392	Mananjary	220	Male	6	CP1	Negative
393	Mananjary	220	Male	7	CP1	Negative
394	Mananjary	220	Male	6	CP1	Negative
395	Mananjary	220	Male	7	CP1	Negative
396	Mananjary	220	Male	6	CP1	Negative
397	Mananjary	220	Male	7	CP2	Negative
398	Mananjary	220	Male	7	CP1	Negative
399	Mananjary	220	Male	7	CP2	Negative
400	Mananjary	220	Male	7	CP2	Negative
401	Mananjary	220	Female	7	CP2	Negative
402	Mananjary	220	Female	7	CP2	Negative
403	Mananjary	220	Female	7	CP2	Negative
404	Mananjary	220	Female	7	CP2	Negative
405	Mananjary	220	Female	7	CP2	Negative
406	Mananjary	220	Female	7	CP2	Negative
407	Mananjary	220	Female	7	CP2	Negative
408	Mananjary	220	Female	7	CP2	Negative
409	Mananjary	220	Male	7	CP2	Negative
410	Mananjary	220	Male	7	CP2	Negative
411	Mananjary	220	Male	7	CP2	Negative
412	Mananjary	220	Male	7	CP2	Negative
413	Mananjary	220	Male	7	CP2	Negative
414	Mananjary	220	Male	7	CP2	Negative
415	Mananjary	220	Male	7	CP2	Negative
416	Mananjary	220	Male	7	CP2	Negative
417	Mananjary	220	Male	7	CP2	Negative
418	Mananjary	220	Male	7	CP2	Negative
419	Mananjary	220	Male	7	CP2	Negative
420	Mananjary	220	Male	7	CP2	Negative
421	Mananjary	220	Male	7	CP2	Negative
422	Mananjary	220	Male	7	CP2	Negative
423	Mananjary	220	Male	7	CP2	Negative
424	Mananjary	220	Male	7	CP2	Negative
425	Mananjary	220	Male	7	CP2	Negative
426	Mananjary	301	Female	6	CP2	Negative
427	Mananjary	301	Female	6	CP2	Negative
428	Mananjary	301	Female	6	CP1	Negative
429	Mananjary	301	Female	6	CP1	Negative
430	Mananjary	301	Female	7	CP1	Negative
431	Mananjary	301	Female	6	CP1	Negative
432	Mananjary	301	Female	7	CP1	Negative
433	Mananjary	301	Female	7	CP1	Negative
434	Mananjary	301	Female	6	CP1	Negative
435	Mananjary	301	Female	7	CP1	Negative
436	Mananjary	301	Male	6	CP1	Negative
437	Mananjary	301	Male	6	CP1	Negative
438	Mananjary	301	Male	6	CP1	Negative
439	Mananjary	301	Male	6	CP1	Negative
440	Mananjary	301	Male	6	CP1	Negative
441	Mananjary	301	Male	6	CP1	Negative
442	Mananjary	301	Male	7	CP1	Negative
443	Mananjary	301	Male	7	CP1	Negative
444	Mananjary	301	Male	7	CP1	Negative
445	Mananjary	301	Male	7	CP1	Negative
446	Mananjary	301	Male	7	CP1	Negative
447	Mananjary	301	Male	7	CP1	Negative
448	Mananjary	301	Male	7	CP1	Negative
449	Mananjary	301	Male	7	CP1	Negative
450	Mananjary	301	Male	7	CP2	Negative
451	Mananjary	301	Female	7	CP2	Negative
452	Mananjary	301	Male	7	CP2	Negative
453	Mananjary	301	Male	7	CP2	Negative
454	Mananjary	301	Male	7	CP2	Negative
455	Mananjary	301	Female	7	CP2	Negative
456	Mananjary	301	Male	7	CP2	Negative
457	Mananjary	301	Male	7	CP2	Negative
458	Mananjary	301	Female	7	CP2	Negative
459	Mananjary	301	Female	7	CP2	Negative
460	Mananjary	301	Female	7	CP2	Negative
461	Mananjary	301	Female	6	CP1	Negative
462	Mananjary	301	Male	6	CP1	Negative
463	Mananjary	301	Male	6	CP1	Negative
464	Mananjary	301	Male	7	CP2	Negative
465	Mananjary	301	Male	7	CP2	Negative
466	Mananjary	301	Female	6	CP1	Negative
467	Mananjary	301	Female	6	CP1	Negative
468	Mananjary	301	Female	6	CP1	Negative
469	Mananjary	343	Male	7	CP2	Negative
470	Mananjary	343	Male	7	CP1	Negative
471	Mananjary	343	Male	6	CP1	Negative
472	Mananjary	343	Male	6	CP1	Negative
473	Mananjary	343	Male	7	CP2	Negative
474	Mananjary	343	Male	7	CP2	Negative
475	Mananjary	343	Male	7	CP2	Negative
476	Mananjary	343	Male	7	CP2	Negative
477	Mananjary	343	Female	6	CP1	Negative
478	Mananjary	343	Female	7	CP2	Negative
479	Mananjary	343	Female	6	CP1	Negative
480	Mananjary	343	Male	6	CP1	Negative
481	Mananjary	343	Male	6	CP1	Negative
482	Mananjary	343	Male	6	CP1	Negative
483	Mananjary	343	Female	6	CP1	Negative
484	Mananjary	343	Male	7	CP2	Negative
485	Mananjary	343	Male	6	CP1	Negative
486	Mananjary	343	Female	6	CP1	Negative
487	Mananjary	343	Male	7	CP2	Negative
488	Mananjary	343	Male	7	CP1	Negative
489	Mananjary	343	Male	7	CP2	Negative
490	Mananjary	343	Male	7	CP2	Negative
491	Mananjary	343	Male	7	CP2	Negative
492	Mananjary	343	Male	6	CP1	Negative
493	Mananjary	343	Male	6	CP1	Negative
494	Mananjary	343	Male	6	CP1	Negative
495	Mananjary	343	Male	6	CP1	Negative
496	Mananjary	343	Female	7	CP2	Negative
497	Mananjary	343	Female	6	CP1	Negative
498	Mananjary	343	Female	6	CP1	Negative
499	Mananjary	343	Female	6	CP1	Negative
500	Mananjary	343	Female	6	CP1	Negative
501	Mananjary	343	Female	7	CP2	Negative
502	Mananjary	343	Female	7	CP2	Negative
503	Mananjary	343	Female	6	CP1	Negative
504	Mananjary	343	Female	7	CP2	Negative
505	Mananjary	343	Female	7	CP2	Negative
506	Mananjary	343	Female	7	CP2	Negative
507	Mananjary	343	Male	6	CP1	Negative
508	Mananjary	343	Female	6	CP1	Negative
509	Mananjary	343	Female	6	CP1	Negative
510	Mananjary	343	Female	7	CP2	Negative
511	Mananjary	343	Male	6	CP1	Negative
512	Mananjary	343	Female	6	CP1	Negative
513	Mananjary	343	Male	7	CP2	Negative
514	Mananjary	343	Female	6	CP1	Negative
515	Mananjary	343	Male	7	CP2	Negative
516	Mananjary	343	Male	6	CP2	Negative
517	Mananjary	382	Male	6	CP1	Negative
518	Mananjary	382	Male	6	CP1	Negative
519	Mananjary	382	Male	8	CP1	Negative
520	Mananjary	382	Male	6	CP1	Negative
521	Mananjary	382	Female	7	CP1	Negative
522	Mananjary	382	Female	7	CP1	Negative
523	Mananjary	382	Female	6	CP1	Negative
524	Mananjary	382	Female	7	CP1	Negative
525	Mananjary	382	Male	7	CP1	Negative
526	Mananjary	382	Male	6	CP1	Negative
527	Mananjary	382	Male	8	CP2	Negative
528	Mananjary	382	Male	9	CP2	Negative
529	Mananjary	382	Male	7	CP1	Negative
530	Mananjary	382	Male	7	CP1	Negative
531	Mananjary	382	Male	7	CP1	Negative
532	Mananjary	382	Male	7	CP2	Negative
533	Mananjary	382	Male	6	CP1	Negative
534	Mananjary	382	Male	8	CP2	Negative
535	Mananjary	382	Male	7	CP1	Negative
536	Mananjary	382	Male	8	CP2	Negative
537	Mananjary	382	Male	7	CP1	Negative
538	Mananjary	382	Male	8	CP2	Negative
539	Mananjary	382	Female	8	CP2	Negative
540	Mananjary	382	Female	6	CP1	Negative
541	Mananjary	382	Female	6	CP1	Negative
542	Mananjary	382	Female	9	CP2	Negative
543	Mananjary	382	Female	8	CP2	Negative
544	Mananjary	382	Male	9	CP2	Negative
545	Mananjary	382	Male	7	CP1	Negative
546	Mananjary	382	Male	9	CP2	Negative
547	Mananjary	382	Male	6	CP1	Negative
548	Mananjary	382	Female	9	CP2	Negative
549	Mananjary	382	Female	8	CP2	Negative
550	Mananjary	382	Female	7	CP1	Negative
551	Mananjary	382	Female	7	CP1	Negative
552	Mananjary	382	Male	8	CP2	Negative
553	Mananjary	382	Female	7	CP1	Negative
554	Mananjary	382	Male	8	CP2	Negative
555	Mananjary	382	Male	9	CP2	Negative
556	Mananjary	382	Female	9	CP2	Negative
557	Mananjary	382	Female	9	CP2	Negative
558	Mananjary	382	Male	9	CP2	Negative
559	Mananjary	382	Male	7	CP1	Negative
560	Mananjary	382	Male	6	CP1	Negative
561	Mananjary	382	Male	6	CP1	Negative
562	Mananjary	382	Male	8	CP2	Negative
563	Mananjary	382	Male	6	CP1	Negative
564	Mananjary	382	Female	7	CP1	Negative
565	Mananjary	382	Female	7	CP1	Negative
566	Mananjary	463	Female	7	CP1	Negative
567	Mananjary	463	Female	7	CP1	Negative
568	Mananjary	463	Female	6	CP1	Negative
569	Mananjary	463	Female	7	CP1	Negative
570	Mananjary	463	Female	6	CP1	Negative
571	Mananjary	463	Female	6	CP1	Negative
572	Mananjary	463	Female	7	CP1	Negative
573	Mananjary	463	Female	7	CP1	Negative
574	Mananjary	463	Male	7	CP1	Negative
575	Mananjary	463	Male	7	CP1	Negative
576	Mananjary	463	Female	6	CP1	Negative
577	Mananjary	463	Female	6	CP1	Negative
578	Mananjary	463	Female	7	CP1	Negative
579	Mananjary	463	Female	7	CP1	Negative
580	Mananjary	463	Female	7	CP1	Negative
581	Mananjary	463	Female	6	CP1	Negative
582	Mananjary	463	Female	6	CP1	Negative
583	Mananjary	463	Female	6	CP1	Negative
584	Mananjary	463	Female	6	CP1	Negative
585	Mananjary	463	Female	7	CP1	Negative
586	Mananjary	463	Male	7	CP1	Negative
587	Mananjary	463	Male	7	CP1	Negative
588	Mananjary	463	Male	6	CP1	Negative
589	Mananjary	463	Male	6	CP1	Negative
590	Mananjary	463	Male	7	CP1	Negative
591	Mananjary	463	Male	7	CP1	Negative
592	Mananjary	463	Male	7	CP1	Negative
593	Mananjary	463	Male	7	CP1	Negative
594	Mananjary	463	Male	7	CP2	Negative
595	Mananjary	463	Male	7	CP2	Negative
596	Mananjary	463	Female	7	CP2	Negative
597	Mananjary	463	Male	7	CP2	Negative
598	Mananjary	463	Male	7	CP2	Negative
599	Mananjary	463	Male	7	CP2	Negative
600	Mananjary	463	Male	7	CP2	Negative
601	Mananjary	463	Male	7	CP2	Negative
602	Mananjary	463	Female	6	CP1	Negative
603	Mananjary	463	Male	7	CP2	Negative
604	Mananjary	463	Female	6	CP1	Negative
605	Mananjary	463	Female	7	CP1	Negative
606	Manakara	504	Male	6	CP1	Negative
607	Manakara	504	Male	6	CP1	Negative
608	Manakara	504	Male	6	CP1	Negative
609	Manakara	504	Male	7	CP1	Negative
610	Manakara	504	Male	6	CP1	Negative
611	Manakara	504	Male	6	CP1	Negative
612	Manakara	504	Male	7	CP1	Negative
613	Manakara	504	Male	7	CP1	Negative
614	Manakara	504	Male	6	CP1	Negative
615	Manakara	504	Male	6	CP1	Negative
616	Manakara	504	Male	6	CP1	Negative
617	Manakara	504	Male	6	CP1	Negative
618	Manakara	504	Male	6	CP1	Negative
619	Manakara	504	Male	6	CP1	Negative
620	Manakara	504	Male	7	CP1	Negative
621	Manakara	504	Male	6	CP1	Negative
622	Manakara	504	Male	6	CP1	Negative
623	Manakara	504	Male	6	CP1	Negative
624	Manakara	504	Male	7	CP1	Negative
625	Manakara	504	Male	7	CP1	Negative
626	Manakara	504	Female	6	CP1	Negative
627	Manakara	504	Female	6	CP1	Negative
628	Manakara	504	Female	6	CP1	Negative
629	Manakara	504	Female	6	CP1	Negative
630	Manakara	504	Female	6	CP1	Negative
631	Manakara	504	Female	6	CP1	Negative
632	Manakara	504	Female	7	CP1	Negative
633	Manakara	504	Female	6	CP1	Negative
634	Manakara	504	Female	7	CP1	Negative
635	Manakara	504	Female	6	CP1	Negative
636	Manakara	504	Female	6	CP1	Negative
637	Manakara	504	Female	6	CP1	Negative
638	Manakara	504	Male	7	CP1	Negative
639	Manakara	504	Male	6	CP1	Negative
640	Manakara	504	Male	6	CP1	Negative
641	Manakara	504	Male	7	CP1	Negative
642	Manakara	504	Male	6	CP1	Negative
643	Manakara	504	Male	6	CP1	Negative
644	Manakara	504	Male	6	CP1	Negative
645	Manakara	504	Male	7	CP1	Negative
646	Manakara	504	Male	7	CP2	Negative
647	Manakara	504	Male	8	CP2	Negative
648	Manakara	504	Male	8	CP2	Negative
649	Manakara	504	Male	10	CP2	Negative
650	Manakara	504	Male	9	CP2	Negative
651	Manakara	504	Male	9	CP2	Negative
652	Manakara	504	Male	9	CP2	Negative
653	Manakara	504	Male	10	CP2	Negative
654	Manakara	504	Male	7	CP2	Negative
655	Manakara	504	Male	8	CP2	Negative
656	Manakara	504	Male	9	CP2	Negative
657	Manakara	504	Female	9	CP2	Negative
658	Manakara	504	Female	8	CP2	Negative
659	Manakara	504	Female	8	CP2	Negative
660	Manakara	504	Female	8	CP2	Negative
661	Manakara	504	Female	8	CP2	Negative
662	Manakara	504	Female	10	CP2	Negative
663	Manakara	504	Female	9	CP2	Negative
664	Manakara	504	Female	9	CP2	Negative
665	Manakara	504	Female	8	CP2	Negative
666	Manakara	504	Female	9	CP2	Negative
667	Manakara	504	Female	9	CP2	Negative
668	Manakara	504	Female	10	CP2	Negative
669	Manakara	504	Female	10	CP2	Negative
670	Manakara	504	Female	9	CP2	Negative
671	Manakara	504	Female	9	CP2	Negative
672	Manakara	504	Female	9	CP2	Negative
673	Manakara	504	Female	8	CP2	Negative
674	Manakara	504	Female	8	CP2	Negative
675	Manakara	504	Female	8	CP2	Negative
676	Manakara	504	Female	7	CP2	Negative
677	Manakara	544	Male	7	CP1	Negative
678	Manakara	544	Male	6	CP1	Negative
679	Manakara	544	Male	6	CP1	Negative
680	Manakara	544	Male	6	CP1	Negative
681	Manakara	544	Male	7	CP1	Negative
682	Manakara	544	Male	7	CP1	Negative
683	Manakara	544	Male	6	CP1	Negative
684	Manakara	544	Male	6	CP1	Negative
685	Manakara	544	Male	7	CP1	Negative
686	Manakara	544	Male	8	CP1	Negative
687	Manakara	544	Male	8	CP1	Negative
688	Manakara	544	Female	6	CP1	Negative
689	Manakara	544	Female	7	CP1	Negative
690	Manakara	544	Female	8	CP1	Negative
691	Manakara	544	Female	6	CP1	Negative
692	Manakara	544	Female	6	CP1	Negative
693	Manakara	544	Female	8	CP1	Negative
694	Manakara	544	Female	8	CP1	Negative
695	Manakara	544	Female	7	CP1	Negative
696	Manakara	544	Female	8	CP1	Negative
697	Manakara	544	Female	8	CP1	Negative
698	Manakara	544	Female	10	CP1	Negative
699	Manakara	544	Female	9	CP1	Negative
700	Manakara	544	Female	9	CP1	Negative
701	Manakara	544	Female	6	CP1	Negative
702	Manakara	544	Female	7	CP1	Negative
703	Manakara	544	Female	10	CP1	Negative
704	Manakara	544	Female	9	CP1	Negative
705	Manakara	544	Male	12	CP2	Negative
706	Manakara	544	Male	6	CP2	Negative
707	Manakara	544	Male	7	CP2	Negative
708	Manakara	544	Male	10	CP2	Negative
709	Manakara	544	Male	9	CP2	Negative
710	Manakara	544	Male	13	CP2	Negative
711	Manakara	544	Female	10	CP2	Negative
712	Manakara	544	Female	9	CP2	Negative
713	Manakara	544	Female	9	CP2	Negative
714	Manakara	544	Female	10	CP2	Negative
715	Manakara	544	Female	12	CP2	Negative
716	Manakara	544	Male	11	CP2	Negative
717	Manakara	544	Male	9	CP2	Negative
718	Manakara	544	Female	11	CP2	Negative
719	Manakara	585	Male	6	CP1	Negative
720	Manakara	585	Male	6	CP1	Negative
721	Manakara	585	Male	7	CP2	Negative
722	Manakara	585	Female	8	CP2	Negative
723	Manakara	585	Female	8	CP2	Negative
724	Manakara	585	Female	6	CP1	Negative
725	Manakara	585	Male	6	CP1	Negative
726	Manakara	585	Female	6	CP1	Negative
727	Manakara	585	Female	6	CP1	Negative
728	Manakara	585	Male	8	CP1	Negative
729	Manakara	585	Male	7	CP2	Negative
730	Manakara	585	Male	6	CP1	Negative
731	Manakara	585	Male	10	CP1	Negative
732	Manakara	585	Male	10	CP2	Negative
733	Manakara	585	Male	11	CP2	Negative
734	Manakara	585	Male	11	CP2	Negative
735	Manakara	585	Male	7	CP1	Negative
736	Manakara	585	Female	8	CP2	Negative
737	Manakara	585	Female	8	CP1	Negative
738	Manakara	585	Female	6	CP1	Negative
739	Manakara	585	Female	10	CP2	Negative
740	Manakara	585	Male	10	CP2	Negative
741	Manakara	585	Male	10	CP2	Negative
742	Manakara	585	Male	10	CP2	Negative
743	Manakara	585	Male	7	CP2	Negative
744	Manakara	585	Male	6	CP1	Negative
745	Manakara	585	Male	6	CP1	Negative
746	Manakara	585	Male	6	CP1	Negative
747	Manakara	585	Male	7	CP2	Negative
748	Manakara	585	Male	6	CP1	Negative
749	Manakara	585	Female	6	CP1	Negative
750	Manakara	585	Male	6	CP1	Negative
751	Manakara	585	Male	6	CP1	Negative
752	Manakara	585	Male	6	CP1	Negative
753	Manakara	585	Female	6	CP1	Negative
754	Manakara	585	Female	6	CP1	Negative
755	Manakara	585	Female	6	CP1	Negative
756	Manakara	585	Female	6	CP1	Negative
757	Manakara	585	Male	6	CP1	Negative
758	Manakara	585	Male	6	CP1	Negative
759	Manakara	626	Female	7	CP2	Negative
760	Manakara	626	Female	7	CP1	Negative
761	Manakara	626	Female	7	CP2	Negative
762	Manakara	626	Female	7	CP2	Negative
763	Manakara	626	Female	6	CP1	Negative
764	Manakara	626	Male	6	CP1	Negative
765	Manakara	626	Female	6	CP1	Negative
766	Manakara	626	Female	6	CP1	Negative
767	Manakara	626	Female	7	CP2	Negative
768	Manakara	626	Male	6	CP1	Negative
769	Manakara	626	Male	6	CP1	Negative
770	Manakara	626	Female	7	CP1	Negative
771	Manakara	626	Female	7	CP2	Negative
772	Manakara	626	Female	7	CP2	Negative
773	Manakara	626	Female	7	CP2	Negative
774	Manakara	626	Female	6	CP1	Negative
775	Manakara	626	Female	6	CP1	Negative
776	Manakara	626	Male	7	CP2	Negative
777	Manakara	626	Female	7	CP2	Negative
778	Manakara	626	Female	6	CP1	Negative
779	Manakara	626	Female	7	CP2	Negative
780	Manakara	626	Male	6	CP1	Negative
781	Manakara	626	Male	6	CP1	Negative
782	Manakara	626	Female	6	CP1	Negative
783	Manakara	626	Female	6	CP1	Negative
784	Manakara	626	Female	7	CP2	Negative
785	Manakara	626	Female	6	CP1	Negative
786	Manakara	626	Female	7	CP2	Negative
787	Manakara	626	Female	6	CP1	Negative
788	Manakara	626	Female	6	CP1	Negative
789	Manakara	626	Female	6	CP1	Negative
790	Manakara	626	Male	7	CP2	Negative
791	Manakara	626	Female	7	CP2	Negative
792	Manakara	626	Male	7	CP2	Negative
793	Manakara	626	Male	7	CP2	Negative
794	Manakara	626	Male	7	CP2	Negative
795	Manakara	626	Male	7	CP2	Negative
796	Manakara	626	Male	7	CP2	Negative
797	Manakara	626	Male	7	CP2	Negative
798	Manakara	626	Male	6	CP1	Negative
799	Manakara	626	Male	6	CP1	Negative
800	Manakara	626	Female	6	CP1	Negative
801	Manakara	626	Male	6	CP1	Negative
802	Manakara	626	Male	6	CP1	Negative
803	Manakara	626	Male	6	CP1	Negative
804	Manakara	626	Female	6	CP2	Negative
805	Manakara	626	Female	7	CP2	Negative
806	Manakara	626	Male	7	CP2	Negative
807	Manakara	626	Male	7	CP2	Negative
808	Manakara	626	Male	6	CP1	Negative
809	Manakara	626	Female	6	CP1	Negative
810	Manakara	626	Female	7	CP2	Negative
811	Manakara	626	Male	7	CP2	Negative
812	Manakara	626	Female	7	CP2	Negative
813	Manakara	626	Male	7	CP2	Negative
814	Manakara	626	Male	7	CP2	Negative
815	Manakara	626	Male	7	CP2	Negative
816	Manakara	626	Female	6	CP1	Negative
817	Manakara	626	Male	7	CP2	Negative
818	Manakara	626	Male	6	CP1	Negative
819	Manakara	666	Male	6	CP1	Negative
820	Manakara	666	Male	7	CP1	Negative
821	Manakara	666	Male	7	CP1	Negative
822	Manakara	666	Male	7	CP1	Negative
823	Manakara	666	Male	7	CP1	Negative
824	Manakara	666	Male	7	CP1	Negative
825	Manakara	666	Male	6	CP1	Negative
826	Manakara	666	Male	7	CP1	Negative
827	Manakara	666	Male	6	CP1	Negative
828	Manakara	666	Male	7	CP1	Negative
829	Manakara	666	Male	6	CP1	Negative
830	Manakara	666	Male	7	CP1	Negative
831	Manakara	666	Female	6	CP1	Negative
832	Manakara	666	Female	7	CP1	Negative
833	Manakara	666	Female	6	CP1	Negative
834	Manakara	666	Female	6	CP1	Negative
835	Manakara	666	Female	7	CP2	Negative
836	Manakara	666	Female	7	CP1	Negative
837	Manakara	666	Male	7	CP2	Negative
838	Manakara	666	Male	7	CP1	Negative
839	Manakara	666	Male	6	CP1	Negative
840	Manakara	666	Male	6	CP1	Negative
841	Manakara	666	Female	7	CP1	Negative
842	Manakara	666	Female	6	CP1	Negative
843	Manakara	666	Female	7	CP1	Negative
844	Manakara	666	Female	6	CP1	Negative
845	Manakara	666	Female	6	CP1	Negative
846	Manakara	666	Female	6	CP1	Negative
847	Manakara	666	Female	8	CP1	Negative
848	Manakara	666	Female	7	CP1	Negative
849	Manakara	666	Female	8	CP2	Negative
850	Manakara	666	Female	6	CP1	Negative
851	Manakara	666	Male	7	CP2	Negative
852	Manakara	666	Male	8	CP2	Negative
853	Manakara	666	Female	8	CP2	Negative
854	Manakara	666	Female	9	CP2	Negative
855	Manakara	666	Female	8	CP2	Negative
856	Manakara	666	Female	8	CP2	Negative
857	Manakara	666	Female	7	CP2	Negative
858	Manakara	666	Female	7	CP2	Negative
859	Manakara	666	Female	9	CP2	Negative
860	Manakara	666	Female	9	CP2	Negative
861	Manakara	666	Male	8	CP2	Negative
862	Manakara	666	Female	7	CP2	Negative
863	Manakara	666	Male	6	CP1	Negative
864	Manakara	666	Female	6	CP1	Negative
865	Manakara	666	Female	6	CP1	Negative
866	Manakara	666	Male	6	CP1	Negative
867	Manakara	666	Male	6	CP1	Negative
868	Manakara	666	Male	7	CP1	Negative
869	Manakara	666	Male	7	CP1	Negative
870	Manakara	666	Male	7	CP2	Negative
871	Manakara	666	Female	7	CP2	Negative
872	Manakara	666	Female	8	CP2	Negative
873	Manakara	666	Female	8	CP2	Negative
874	Manakara	666	Female	6	CP1	Negative
875	Manakara	666	Male	6	CP1	Negative
876	Manakara	666	Male	6	CP1	Negative
877	Manakara	666	Female	6	CP1	Negative
878	Manakara	666	Male	6	CP1	Negative
879	Manakara	671	Male	6	CP1	Negative
880	Manakara	671	Male	6	CP1	Negative
881	Manakara	671	Male	6	CP1	Negative
882	Manakara	671	Female	7	CP1	Negative
883	Manakara	671	Female	6	CP1	Negative
884	Manakara	671	Female	6	CP1	Negative
885	Manakara	671	Male	7	CP2	Negative
886	Manakara	671	Male	7	CP2	Negative
887	Manakara	671	Female	8	CP2	Negative
888	Manakara	671	Female	7	CP2	Negative
889	Manakara	671	Male	7	CP1	Negative
890	Manakara	671	Male	6	CP1	Negative
891	Manakara	671	Male	7	CP1	Negative
892	Manakara	671	Male	6	CP1	Negative
893	Manakara	671	Male	7	CP1	Negative
894	Manakara	671	Male	7	CP1	Negative
895	Manakara	671	Male	7	CP1	Negative
896	Manakara	671	Male	6	CP1	Negative
897	Manakara	671	Male	7	CP1	Negative
898	Manakara	671	Male	7	CP1	Negative
899	Manakara	671	Male	9	CP2	Negative
900	Manakara	671	Male	10	CP2	Negative
901	Manakara	671	Male	10	CP2	Negative
902	Manakara	671	Female	10	CP2	Negative
903	Manakara	671	Female	8	CP2	Negative
904	Manakara	671	Female	8	CP2	Negative
905	Manakara	671	Female	9	CP2	Negative
906	Manakara	671	Male	7	CP1	Negative
907	Manakara	671	Male	6	CP1	Negative
908	Manakara	671	Male	6	CP1	Negative
909	Manakara	671	Male	6	CP1	Negative
910	Manakara	671	Male	7	CP1	Negative
911	Manakara	671	Male	7	CP1	Negative
912	Manakara	671	Male	7	CP1	Negative
913	Manakara	671	Female	6	CP1	Negative
914	Manakara	671	Female	7	CP1	Negative
915	Manakara	671	Female	7	CP1	Negative
916	Manakara	671	Female	6	CP1	Negative
917	Manakara	671	Female	6	CP1	Negative
918	Manakara	671	Female	7	CP1	Negative
919	Manakara	671	Female	7	CP1	Negative
920	Manakara	671	Female	7	CP1	Negative
921	Manakara	671	Male	9	CP2	Negative
922	Manakara	671	Male	10	CP2	Negative
923	Manakara	671	Male	8	CP2	Negative
924	Manakara	671	Female	6	CP1	Negative
925	Manakara	671	Female	7	CP1	Negative
926	Manakara	671	Female	7	CP1	Negative
927	Manakara	671	Female	6	CP1	Negative
928	Manakara	671	Female	7	CP1	Negative
929	Manakara	671	Male	7	CP1	Negative
930	Manakara	671	Male	6	CP1	Negative
931	Manakara	671	Male	6	CP1	Negative
932	Manakara	671	Male	7	CP1	Negative
933	Manakara	671	Male	7	CP1	Negative
934	Manakara	671	Male	7	CP1	Negative
935	Manakara	671	Female	9	CP2	Negative
936	Manakara	671	Female	9	CP2	Negative
937	Manakara	671	Female	10	CP2	Negative
938	Manakara	671	Female	8	CP2	Negative
939	Manakara	671	Female	10	CP2	Negative
940	Manakara	671	Male	8	CP1	Negative
941	Manakara	671	Male	8	CP1	Negative
942	Manakara	671	Male	7	CP1	Negative
943	Manakara	671	Male	7	CP1	Negative
944	Manakara	671	Female	7	CP1	Negative
945	Manakara	671	Female	6	CP1	Negative
946	Manakara	671	Female	7	CP1	Negative
947	Manakara	671	Female	6	CP1	Negative
948	Manakara	671	Female	7	CP1	Negative
949	Manakara	671	Male	9	CP2	Negative
950	Manakara	671	Male	8	CP2	Negative
951	Manakara	671	Male	8	CP2	Negative
952	Manakara	671	Male	8	CP2	Negative
953	Manakara	671	Male	9	CP2	Negative
954	Manakara	671	Male	9	CP2	Negative
955	Manakara	671	Male	9	CP2	Negative
956	Manakara	671	Male	9	CP2	Negative
957	Manakara	671	Male	8	CP2	Negative
958	Manakara	671	Female	8	CP2	Negative
959	Manakara	671	Female	8	CP2	Negative
960	Manakara	671	Female	9	CP2	Negative
961	Manakara	671	Female	9	CP2	Negative
962	Manakara	671	Female	9	CP2	Negative
963	Manakara	671	Female	8	CP2	Negative
964	Manakara	671	Female	9	CP2	Negative
965	Manakara	671	Female	9	CP2	Negative
966	Manakara	706	Male	8	CP2	Negative
967	Manakara	706	Female	7	CP2	Negative
968	Manakara	706	Male	7	CP2	Negative
969	Manakara	706	Male	7	CP2	Negative
970	Manakara	706	Male	8	CP2	Negative
971	Manakara	706	Male	7	CP2	Negative
972	Manakara	706	Female	6	CP1	Negative
973	Manakara	706	Female	8	CP2	Negative
974	Manakara	706	Female	8	CP2	Negative
975	Manakara	706	Female	8	CP2	Negative
976	Manakara	706	Male	8	CP2	Negative
977	Manakara	706	Male	7	CP2	Negative
978	Manakara	706	Female	6	CP1	Negative
979	Manakara	706	Male	6	CP1	Negative
980	Manakara	706	Male	6	CP1	Negative
981	Manakara	706	Male	6	CP1	Negative
982	Manakara	706	Male	8	CP2	Negative
983	Manakara	706	Male	6	CP1	Negative
984	Manakara	706	Female	8	CP2	Negative
985	Manakara	706	Female	8	CP2	Negative
986	Manakara	706	Male	8	CP2	Negative
987	Manakara	706	Male	6	CP1	Negative
988	Manakara	706	Female	6	CP1	Negative
989	Manakara	706	Female	6	CP1	Negative
990	Manakara	706	Male	6	CP1	Negative
991	Manakara	706	Male	8	CP2	Negative
992	Manakara	706	Male	8	CP2	Negative
993	Manakara	706	Male	6	CP1	Negative
994	Manakara	706	Male	8	CP2	Negative
995	Manakara	706	Male	6	CP1	Negative
996	Manakara	706	Female	8	CP2	Negative
997	Manakara	706	Female	6	CP1	Negative
998	Manakara	706	Male	6	CP1	Negative
999	Manakara	706	Male	6	CP1	Negative
1000	Manakara	706	Female	6	CP1	Negative
1001	Manakara	706	Female	6	CP1	Negative
1002	Manakara	706	Female	8	CP2	Negative
1003	Manakara	706	Female	8	CP2	Negative
1004	Manakara	706	Male	6	CP1	Negative
1005	Manakara	706	Male	6	CP1	Negative
1006	Manakara	747	Female	6	CP1	Negative
1007	Manakara	747	Female	6	CP1	Negative
1008	Manakara	747	Female	6	CP1	Negative
1009	Manakara	747	Female	7	CP2	Negative
1010	Manakara	747	Female	7	CP2	Negative
1011	Manakara	747	Female	7	CP2	Negative
1012	Manakara	747	Male	7	CP2	Negative
1013	Manakara	747	Male	7	CP2	Negative
1014	Manakara	747	Male	7	CP2	Negative
1015	Manakara	747	Male	7	CP1	Negative
1016	Manakara	747	Male	6	CP1	Negative
1017	Manakara	747	Male	7	CP2	Negative
1018	Manakara	747	Male	6	CP2	Negative
1019	Manakara	747	Male	7	CP2	Negative
1020	Manakara	747	Male	7	CP2	Negative
1021	Manakara	747	Male	6	CP1	Negative
1022	Manakara	747	Male	7	CP1	Negative
1023	Manakara	747	Male	7	CP1	Negative
1024	Manakara	747	Male	7	CP2	Negative
1025	Manakara	747	Male	7	CP2	Negative
1026	Manakara	747	Male	7	CP2	Negative
1027	Manakara	747	Male	7	CP2	Negative
1028	Manakara	747	Male	7	CP2	Negative
1029	Manakara	747	Male	7	CP2	Negative
1030	Manakara	747	Female	7	CP2	Negative
1031	Manakara	747	Female	7	CP2	Negative
1032	Manakara	747	Female	6	CP1	Negative
1033	Manakara	747	Female	6	CP1	Negative
1034	Manakara	747	Female	6	CP1	Negative
1035	Manakara	747	Female	7	CP2	Negative
1036	Manakara	747	Female	7	CP2	Negative
1037	Manakara	747	Female	6	CP2	Negative
1038	Manakara	747	Female	7	CP2	Negative
1039	Manakara	747	Female	7	CP2	Negative
1040	Manakara	747	Male	7	CP2	Negative
1041	Manakara	747	Male	7	CP2	Negative
1042	Manakara	747	Male	7	CP2	Negative
1043	Manakara	747	Female	7	CP2	Negative
1044	Manakara	747	Female	7	CP2	Negative
1045	Manakara	747	Female	7	CP2	Negative
1046	Manakara	747	Male	7	CP2	Negative
1047	Manakara	747	Female	7	CP2	Negative
1048	Manakara	747	Male	7	CP2	Negative
1049	Manakara	747	Male	7	CP2	Negative
1050	Manakara	747	Male	7	CP2	Negative
1051	Manakara	747	Male	7	CP2	Negative
1052	Manakara	747	Female	7	CP2	Negative
1053	Manakara	747	Female	7	CP2	Negative
1054	Manakara	747	Female	7	CP2	Negative
1055	Manakara	747	Male	7	CP2	Negative
1056	Manakara	747	Male	7	CP2	Negative
1057	Manakara	747	Male	7	CP2	Negative
1058	Manakara	747	Female	7	CP2	Negative
1059	Manakara	747	Female	7	CP2	Negative
1060	Manakara	747	Female	7	CP2	Negative
1061	Manakara	747	Male	7	CP2	Negative
1062	Manakara	747	Male	7	CP2	Negative
1063	Manakara	747	Male	7	CP2	Negative
1064	Manakara	747	Female	7	CP2	Negative
1065	Manakara	747	Female	7	CP2	Negative
1066	Manakara	747	Male	7	CP2	Negative
1067	Manakara	747	Male	7	CP2	Negative
1068	Manakara	788	Male	6	CP1	Negative
1069	Manakara	788	Male	6	CP1	Negative
1070	Manakara	788	Male	7	CP1	Negative
1071	Manakara	788	Male	7	CP1	Negative
1072	Manakara	788	Male	6	CP1	Negative
1073	Manakara	788	Male	6	CP1	Negative
1074	Manakara	788	Male	6	CP1	Negative
1075	Manakara	788	Male	6	CP1	Negative
1076	Manakara	788	Male	7	CP1	Negative
1077	Manakara	788	Male	6	CP1	Negative
1078	Manakara	788	Male	6	CP1	Negative
1079	Manakara	788	Male	6	CP1	Negative
1080	Manakara	788	Male	7	CP1	Negative
1081	Manakara	788	Male	6	CP1	Negative
1082	Manakara	788	Male	6	CP1	Negative
1083	Manakara	788	Male	7	CP1	Negative
1084	Manakara	788	Male	6	CP1	Negative
1085	Manakara	788	Male	7	CP1	Negative
1086	Manakara	788	Male	7	CP1	Negative
1087	Manakara	788	Male	7	CP2	Negative
1088	Manakara	788	Male	7	CP2	Negative
1089	Manakara	788	Male	7	CP2	Negative
1090	Manakara	788	Male	7	CP2	Negative
1091	Manakara	788	Male	7	CP2	Negative
1092	Manakara	788	Male	7	CP2	Negative
1093	Manakara	788	Male	7	CP2	Negative
1094	Manakara	788	Male	7	CP2	Negative
1095	Manakara	788	Male	7	CP2	Negative
1096	Manakara	788	Male	7	CP2	Negative
1097	Manakara	788	Male	7	CP2	Negative
1098	Manakara	788	Male	7	CP2	Negative
1099	Manakara	788	Female	6	CP1	Negative
1100	Manakara	788	Female	7	CP1	Negative
1101	Manakara	788	Female	7	CP1	Negative
1102	Manakara	788	Female	7	CP1	Negative
1103	Manakara	788	Female	6	CP1	Negative
1104	Manakara	788	Female	7	CP1	Negative
1105	Manakara	788	Female	6	CP1	Negative
1106	Manakara	788	Female	6	CP1	Negative
1107	Manakara	788	Female	6	CP1	Negative
1108	Manakara	788	Female	6	CP1	Negative
1109	Manakara	788	Female	6	CP1	Negative
1110	Manakara	788	Female	6	CP1	Negative
1111	Manakara	788	Female	6	CP1	Negative
1112	Manakara	788	Female	7	CP1	Negative
1113	Manakara	788	Female	7	CP1	Negative
1114	Manakara	788	Female	7	CP1	Negative
1115	Manakara	788	Female	7	CP1	Negative
1116	Manakara	788	Female	7	CP1	Negative
1117	Manakara	788	Female	7	CP1	Negative
1118	Manakara	788	Female	7	CP1	Negative
1119	Manakara	788	Female	7	CP1	Negative
1120	Manakara	788	Female	7	CP1	Negative
1121	Manakara	788	Female	7	CP2	Negative
1122	Manakara	788	Female	7	CP2	Negative
1123	Manakara	788	Female	7	CP2	Negative
1124	Manakara	788	Female	7	CP2	Negative
1125	Manakara	788	Female	7	CP2	Negative
1126	Manakara	788	Female	7	CP2	Negative
1127	Manakara	788	Female	7	CP2	Negative
1128	Manakara	788	Female	7	CP2	Negative
1129	Manakara	788	Female	7	CP2	Negative
1130	Manakara	788	Female	7	CP2	Negative
1131	Manakara	788	Female	7	CP2	Negative
1132	Manakara	788	Female	7	CP2	Negative
1133	Manakara	788	Female	7	CP2	Negative
1134	Manakara	788	Female	7	CP2	Negative
1135	Manakara	788	Female	7	CP2	Negative
1136	Manakara	788	Female	7	CP2	Negative
1137	Manakara	788	Female	7	CP2	Negative
1138	Manakara	788	Male	7	CP2	Negative
1139	Manakara	828	Male	6	CP1	Negative
1140	Manakara	828	Male	6	CP1	Negative
1141	Manakara	828	Female	8	CP2	Negative
1142	Manakara	828	Female	8	CP2	Negative
1143	Manakara	828	Male	8	CP2	Negative
1144	Manakara	828	Male	6	CP1	Negative
1145	Manakara	828	Female	8	CP1	Negative
1146	Manakara	828	Female	7	CP2	Negative
1147	Manakara	828	Female	7	CP2	Negative
1148	Manakara	828	Male	7	CP1	Negative
1149	Manakara	828	Male	6	CP1	Negative
1150	Manakara	828	Male	6	CP1	Negative
1151	Manakara	828	Female	7	CP1	Negative
1152	Manakara	828	Female	7	CP2	Negative
1153	Manakara	828	Male	7	CP2	Negative
1154	Manakara	828	Male	7	CP2	Negative
1155	Manakara	828	Male	7	CP2	Negative
1156	Manakara	828	Female	8	CP2	Negative
1157	Manakara	828	Male	8	CP2	Negative
1158	Manakara	828	Female	7	CP2	Negative
1159	Manakara	828	Male	6	CP1	Negative
1160	Manakara	828	Male	6	CP1	Negative
1161	Manakara	828	Female	6	CP1	Negative
1162	Manakara	828	Female	6	CP1	Negative
1163	Manakara	828	Male	7	CP2	Negative
1164	Manakara	828	Female	7	CP2	Negative
1165	Manakara	828	Male	7	CP2	Negative
1166	Manakara	828	Male	6	CP1	Negative
1167	Manakara	828	Male	6	CP1	Negative
1168	Manakara	828	Female	6	CP1	Negative
1169	Manakara	828	Female	6	CP1	Negative
1170	Manakara	828	Male	7	CP2	Negative
1171	Manakara	828	Female	6	CP1	Negative
1172	Manakara	828	Male	7	CP1	Negative
1173	Manakara	828	Male	6	CP1	Negative
1174	Manakara	828	Male	6	CP1	Negative
1175	Manakara	828	Female	7	CP2	Negative
1176	Manakara	828	Female	7	CP2	Negative
1177	Manakara	828	Female	6	CP1	Negative
1178	Manakara	828	Female	8	CP1	Negative
1179	Manakara	828	Female	6	CP1	Negative
1180	Manakara	828	Male	7	CP2	Negative
1181	Manakara	828	Male	7	CP2	Negative
1182	Manakara	828	Female	7	CP2	Negative
1183	Manakara	828	Female	7	CP2	Negative
1184	Manakara	828	Male	7	CP1	Negative
1185	Manakara	828	Female	6	CP1	Negative
1186	Manakara	828	Female	6	CP1	Negative
1187	Manakara	828	Male	7	CP2	Negative
1188	Manakara	828	Female	8	CP2	Negative
1189	Manakara	828	Male	6	CP1	Negative
1190	Manakara	828	Male	6	CP1	Negative
1191	Manakara	828	Male	8	CP1	Negative
1192	Manakara	828	Male	7	CP1	Negative
1193	Manakara	828	Male	7	CP2	Negative
1194	Manakara	828	Female	6	CP1	Negative
1195	Manakara	828	Female	6	CP1	Negative
1196	Manakara	828	Female	6	CP1	Negative
1197	Manakara	828	Female	6	CP1	Negative
1198	Manakara	828	Female	6	CP1	Negative
1199	Manakara	828	Female	6	CP1	Negative
1200	Manakara	828	Male	6	CP1	Negative
1201	Manakara	828	Male	6	CP1	Negative
1202	Manakara	828	Male	8	CP1	Negative
1203	Manakara	828	Male	6	CP1	Negative
1204	Manakara	828	Female	7	CP2	Negative
1205	Manakara	828	Male	7	CP2	Negative
1206	Manakara	828	Female	7	CP2	Negative
1207	Manakara	828	Female	8	CP1	Negative
1208	Manakara	828	Female	7	CP1	Negative
1209	Manakara	828	Male	6	CP1	Negative
1210	Manakara	828	Male	6	CP1	Negative
1211	Manakara	828	Male	7	CP1	Negative
1212	Manakara	828	Female	6	CP1	Negative
1213	Manakara	828	Female	8	CP2	Negative
1214	Manakara	828	Male	7	CP2	Negative
1215	Manakara	828	Female	7	CP2	Negative
1216	Manakara	828	Female	8	CP2	Negative
1217	Manakara	828	Female	7	CP2	Negative
1218	Manakara	828	Male	6	CP1	Negative
1219	Manakara	828	Male	8	CP1	Negative
1220	Manakara	828	Male	6	CP1	Negative
1221	Manakara	828	Male	6	CP1	Negative
1222	Manakara	828	Female	7	CP2	Negative
1223	Manakara	828	Male	7	CP2	Negative
1224	Manakara	828	Female	7	CP2	Negative
1225	Manakara	828	Female	7	CP2	Negative
1226	Manakara	828	Female	6	CP1	Negative
1227	Manakara	828	Female	8	CP1	Negative
1228	Manakara	828	Female	7	CP1	Negative
1229	Manakara	828	Male	6	CP1	Negative
1230	Manakara	828	Male	6	CP1	Negative
1231	Manakara	828	Female	6	CP1	Negative
1232	Manakara	828	Male	7	CP2	Negative
1233	Manakara	828	Male	8	CP2	Negative
1234	Manakara	828	Female	7	CP2	Negative
1235	Manakara	828	Female	6	CP1	Negative
1236	Manakara	828	Female	6	CP1	Negative
1237	Manakara	828	Female	6	CP1	Negative
1238	Manakara	828	Male	8	CP1	Negative
1239	Manakara	869	Female	6	CP1	Negative
1240	Manakara	869	Female	6	CP1	Negative
1241	Manakara	869	Male	6	CP1	Negative
1242	Manakara	869	Female	6	CP1	Negative
1243	Manakara	869	Female	6	CP1	Negative
1244	Manakara	869	Male	6	CP1	Negative
1245	Manakara	869	Male	6	CP1	Negative
1246	Manakara	869	Male	6	CP1	Negative
1247	Manakara	869	Female	6	CP1	Negative
1248	Manakara	869	Male	6	CP1	Negative
1249	Manakara	869	Male	6	CP1	Negative
1250	Manakara	869	Male	6	CP1	Negative
1251	Manakara	869	Female	6	CP1	Negative
1252	Manakara	869	Female	6	CP1	Negative
1253	Manakara	869	Female	6	CP1	Negative
1254	Manakara	869	Female	6	CP1	Negative
1255	Manakara	869	Female	6	CP1	Negative
1256	Manakara	869	Male	6	CP1	Negative
1257	Manakara	869	Female	6	CP1	Negative
1258	Manakara	869	Male	6	CP1	Negative
1259	Manakara	869	Female	7	CP1	Negative
1260	Manakara	869	Female	7	CP1	Negative
1261	Manakara	869	Male	6	CP1	Negative
1262	Manakara	869	Male	7	CP1	Negative
1263	Manakara	869	Male	7	CP2	Negative
1264	Manakara	869	Male	7	CP2	Negative
1265	Manakara	869	Male	6	CP2	Negative
1266	Manakara	869	Male	6	CP2	Negative
1267	Manakara	869	Female	6	CP2	Negative
1268	Manakara	869	Female	6	CP2	Negative
1269	Manakara	869	Male	7	CP2	Negative
1270	Manakara	869	Male	6	CP2	Negative
1271	Manakara	869	Female	7	CP2	Negative
1272	Manakara	869	Female	7	CP2	Negative
1273	Manakara	869	Female	7	CP2	Negative
1274	Manakara	869	Female	6	CP2	Negative
1275	Manakara	869	Male	6	CP2	Negative
1276	Manakara	869	Male	7	CP2	Negative
1277	Manakara	869	Male	6	CP2	Negative
1278	Manakara	869	Male	6	CP2	Negative
1279	Manakara	869	Female	6	CP2	Negative
1280	Manakara	869	Female	7	CP2	Negative
1281	Manakara	869	Female	7	CP2	Negative
1282	Manakara	869	Male	7	CP2	Negative
1283	Manakara	869	Female	7	CP2	Negative
1284	Manakara	869	Female	6	CP2	Negative
1285	Manakara	869	Female	6	CP2	Negative
1286	Manakara	869	Female	7	CP2	Negative
1287	Manakara	869	Female	7	CP2	Negative
1288	Manakara	869	Female	7	CP2	Negative
1289	Manakara	869	Male	7	CP2	Negative
1290	Manakara	869	Male	7	CP2	Negative
1291	Manakara	869	Female	6	CP2	Negative
1292	Manakara	869	Male	7	CP2	Negative
1293	Manakara	869	Male	7	CP2	Negative
1294	Manakara	869	Male	7	CP2	Negative
1295	Manakara	869	Male	6	CP2	Negative
1296	Manakara	869	Male	7	CP2	Negative
1297	Manakara	869	Female	7	CP2	Negative
1298	Manakara	869	Male	7	CP2	Negative
1299	Manakara	869	Male	7	CP2	Negative
1300	Manakara	869	Male	7	CP2	Negative
1301	Manakara	869	Female	7	CP2	Negative
1302	Manakara	869	Male	7	CP2	Negative
1303	Manakara	869	Male	7	CP2	Negative
1304	Manakara	909	Male	6	CP1	Negative
1305	Manakara	909	Male	7	CP2	Negative
1306	Manakara	909	Female	9	CP2	Negative
1307	Manakara	909	Male	8	CP2	Negative
1308	Manakara	909	Male	7	CP2	Negative
1309	Manakara	909	Male	10	CP2	Negative
1310	Manakara	909	Female	6	CP1	Negative
1311	Manakara	909	Male	10	CP2	Negative
1312	Manakara	909	Male	10	CP2	Negative
1313	Manakara	909	Male	9	CP2	Negative
1314	Manakara	909	Male	7	CP2	Negative
1315	Manakara	909	Male	7	CP2	Negative
1316	Manakara	909	Female	7	CP2	Negative
1317	Manakara	909	Male	9	CP2	Negative
1318	Manakara	909	Male	7	CP2	Negative
1319	Manakara	909	Female	8	CP2	Negative
1320	Manakara	909	Male	10	CP2	Negative
1321	Manakara	909	Female	8	CP2	Negative
1322	Manakara	909	Female	8	CP2	Negative
1323	Manakara	909	Female	6	CP1	Negative
1324	Manakara	909	Female	10	CP2	Negative
1325	Manakara	909	Male	8	CP2	Negative
1326	Manakara	909	Female	10	CP2	Negative
1327	Manakara	909	Female	10	CP2	Negative
1328	Manakara	909	Male	10	CP2	Negative
1329	Manakara	909	Male	12	CP2	Negative
1330	Manakara	909	Male	10	CP2	Negative
1331	Manakara	909	Female	8	CP2	Negative
1332	Manakara	909	Female	7	CP2	Negative
1333	Manakara	909	Female	8	CP2	Negative
1334	Manakara	909	Male	10	CP2	Negative
1335	Manakara	909	Female	8	CP2	Negative
1336	Manakara	909	Female	9	CP2	Negative
1337	Manakara	909	Male	11	CP2	Negative
1338	Manakara	909	Male	9	CP2	Negative
1339	Manakara	909	Male	9	CP2	Negative
1340	Manakara	909	Male	7	CP2	Negative
1341	Manakara	909	Male	12	CP2	Negative
1342	Manakara	909	Male	8	CP2	Negative
1343	Manakara	909	Male	10	CP2	Negative
1344	Manakara	909	Male	9	CP2	Negative
1345	Manakara	909	Male	12	CP2	Negative
1346	Manakara	909	Female	8	CP2	Negative
1347	Manakara	909	Female	9	CP2	Negative
1348	Manakara	909	Female	8	CP2	Negative
1349	Manakara	909	Female	8	CP2	Negative
1350	Manakara	909	Male	9	CP2	Negative
1351	Manakara	909	Male	9	CP2	Negative
1352	Manakara	909	Female	7	CP2	Negative
1353	Manakara	909	Female	9	CP2	Negative
1354	Manakara	909	Female	7	CP2	Negative
1355	Manakara	909	Female	10	CP2	Negative
1356	Manakara	909	Female	8	CP2	Negative
1357	Manakara	909	Female	9	CP2	Negative
1358	Manakara	909	Female	8	CP2	Negative
1359	Manakara	909	Female	8	CP2	Negative
1360	Manakara	909	Female	7	CP2	Negative
1361	Manakara	909	Female	9	CP2	Negative
1362	Manakara	909	Female	8	CP2	Negative
1363	Manakara	909	Female	7	CP2	Negative
1364	Manakara	909	Female	7	CP2	Negative
1365	Manakara	909	Male	9	CP2	Negative
1366	Manakara	909	Female	8	CP2	Negative
1367	Manakara	909	Female	7	CP2	Negative
1368	Manakara	909	Female	9	CP2	Negative
1369	Manakara	909	Female	7	CP2	Negative
1370	Manakara	909	Male	8	CP2	Negative
1371	Manakara	909	Female	8	CP2	Negative
1372	Manakara	909	Female	8	CP2	Negative
1373	Manakara	909	Male	10	CP2	Negative
1374	Manakara	909	Male	7	CP2	Negative
1375	Manakara	909	Male	8	CP2	Negative
1376	Manakara	909	Male	8	CP2	Negative
1377	Manakara	909	Female	8	CP2	Negative
1378	Manakara	909	Male	8	CP2	Negative
1379	Manakara	909	Male	6	CP1	Negative
1380	Manakara	909	Female	9	CP2	Negative
1381	Manakara	909	Female	9	CP2	Negative
1382	Manakara	909	Female	6	CP1	Negative
1383	Manakara	909	Female	9	CP2	Negative
1384	Manakara	909	Female	8	CP2	Negative
1385	Manakara	909	Female	6	CP1	Negative
1386	Manakara	909	Male	9	CP2	Negative
1387	Manakara	909	Female	7	CP2	Negative
1388	Manakara	950	Male	6	CP1	Negative
1389	Manakara	950	Female	6	CP1	Negative
1390	Manakara	950	Male	6	CP1	Negative
1391	Manakara	950	Male	6	CP1	Negative
1392	Manakara	950	Male	6	CP1	Negative
1393	Manakara	950	Male	6	CP1	Negative
1394	Manakara	950	Male	6	CP1	Negative
1395	Manakara	950	Male	6	CP1	Negative
1396	Manakara	950	Male	7	CP1	Negative
1397	Manakara	950	Male	7	CP1	Negative
1398	Manakara	950	Male	7	CP1	Negative
1399	Manakara	950	Male	6	CP1	Negative
1400	Manakara	950	Male	6	CP1	Negative
1401	Manakara	950	Male	6	CP1	Negative
1402	Manakara	950	Male	6	CP1	Negative
1403	Manakara	950	Male	6	CP1	Negative
1404	Manakara	950	Male	6	CP1	Negative
1405	Manakara	950	Male	6	CP1	Negative
1406	Manakara	950	Female	6	CP1	Negative
1407	Manakara	950	Female	6	CP1	Negative
1408	Manakara	950	Female	6	CP1	Negative
1409	Manakara	950	Female	6	CP1	Negative
1410	Manakara	950	Female	6	CP1	Negative
1411	Manakara	950	Female	6	CP1	Negative
1412	Manakara	950	Female	6	CP1	Negative
1413	Manakara	950	Female	6	CP1	Negative
1414	Manakara	950	Female	6	CP1	Negative
1415	Manakara	950	Female	6	CP1	Negative
1416	Manakara	950	Female	6	CP1	Negative
1417	Manakara	950	Female	6	CP1	Negative
1418	Manakara	950	Female	7	CP1	Negative
1419	Manakara	950	Female	7	CP1	Negative
1420	Manakara	950	Female	6	CP1	Negative
1421	Manakara	950	Female	7	CP1	Negative
1422	Manakara	950	Female	7	CP1	Negative
1423	Manakara	950	Female	7	CP1	Negative
1424	Manakara	950	Female	7	CP1	Negative
1425	Manakara	950	Female	7	CP1	Negative
1426	Manakara	950	Male	7	CP2	Negative
1427	Manakara	950	Male	7	CP2	Negative
1428	Manakara	950	Male	7	CP2	Negative
1429	Manakara	950	Male	7	CP2	Negative
1430	Manakara	950	Male	7	CP2	Negative
1431	Manakara	950	Male	7	CP2	Negative
1432	Manakara	950	Male	8	CP2	Negative
1433	Manakara	950	Male	7	CP2	Negative
1434	Manakara	950	Male	7	CP2	Negative
1435	Manakara	950	Male	7	CP2	Negative
1436	Manakara	950	Male	7	CP2	Negative
1437	Manakara	950	Male	7	CP2	Negative
1438	Manakara	950	Male	7	CP2	Negative
1439	Manakara	950	Male	8	CP2	Negative
1440	Manakara	950	Male	8	CP2	Negative
1441	Manakara	950	Male	8	CP2	Negative
1442	Manakara	950	Male	8	CP2	Negative
1443	Manakara	950	Male	8	CP2	Negative
1444	Manakara	950	Female	8	CP2	Negative
1445	Manakara	950	Female	7	CP2	Negative
1446	Manakara	950	Female	8	CP2	Negative
1447	Manakara	950	Female	7	CP2	Negative
1448	Manakara	950	Female	8	CP2	Negative
1449	Manakara	950	Female	8	CP2	Negative
1450	Manakara	950	Female	7	CP2	Negative
1451	Manakara	950	Female	7	CP2	Negative
1452	Manakara	950	Female	7	CP2	Negative
1453	Manakara	950	Female	7	CP2	Negative
1454	Manakara	950	Female	8	CP2	Negative
1455	Manakara	950	Female	7	CP2	Negative
1456	Manakara	950	Female	7	CP2	Negative
1457	Manakara	950	Female	7	CP2	Negative
1458	Manakara	950	Female	8	CP2	Negative
1459	Manakara	950	Female	8	CP2	Negative
1460	Manakara	950	Female	7	CP2	Negative
1461	Manakara	950	Female	8	CP2	Negative
1462	Manakara	950	Male	7	CP2	Negative
1463	Manakara	950	Male	7	CP2	Negative
1464	Manakara	950	Male	7	CP2	Negative
1465	Manakara	950	Male	7	CP2	Negative
1466	Manakara	950	Male	7	CP2	Negative
1467	Manakara	950	Male	7	CP2	Negative
1468	Manakara	950	Male	7	CP2	Negative
1469	Manakara	950	Male	7	CP2	Negative
1470	Manakara	950	Male	7	CP2	Negative
1471	Manakara	950	Male	7	CP2	Negative
1472	Manakara	950	Female	6	CP2	Negative
1473	Manakara	950	Female	6	CP2	Negative
1474	Manakara	950	Female	6	CP2	Negative
1475	Manakara	950	Female	6	CP2	Negative
1476	Manakara	950	Female	6	CP2	Negative
1477	Manakara	950	Female	7	CP2	Negative
1478	Manakara	950	Female	7	CP2	Negative
1479	Manakara	950	Female	7	CP2	Negative
1480	Manakara	950	Female	7	CP2	Negative
1481	Manakara	950	Female	7	CP2	Negative
1482	Manakara	950	Female	7	CP2	Negative
1483	Manakara	950	Female	7	CP2	Negative
1484	Manakara	950	Female	7	CP2	Negative
1485	Manakara	950	Male	7	CP2	Negative
1486	Manakara	950	Male	7	CP2	Negative
1487	Manakara	950	Male	7	CP2	Negative
1488	Manakara	950	Male	7	CP2	Negative
1489	Manakara	950	Male	7	CP2	Negative
1490	Manakara	950	Male	7	CP2	Negative
1491	Manakara	950	Female	7	CP2	Negative
1492	Manakara	950	Female	7	CP2	Negative
1493	Manakara	950	Female	7	CP2	Negative
1494	Manakara	950	Female	7	CP2	Negative
1495	Manakara	950	Female	7	CP2	Negative
1496	Manakara	950	Female	7	CP2	Negative
1497	Manakara	950	Male	7	CP2	Negative
1498	Manakara	950	Male	7	CP2	Negative
1499	Manakara	950	Male	7	CP2	Negative
1500	Manakara	950	Male	7	CP2	Negative
1501	Manakara	950	Male	7	CP2	Negative
1502	Manakara	950	Male	7	CP2	Negative
1503	Manakara	950	Male	7	CP2	Negative
1504	Manakara	950	Female	7	CP2	Negative
1505	Manakara	950	Female	7	CP2	Negative
1506	Manakara	950	Female	7	CP2	Negative
1507	Manakara	950	Female	7	CP2	Negative
1508	Manakara	950	Female	7	CP2	Negative
1509	Manakara	950	Female	7	CP2	Negative
1510	Manakara	950	Female	7	CP2	Negative
1511	Manakara	950	Female	7	CP2	Negative
1512	Manakara	950	Female	7	CP2	Negative
1513	Manakara	950	Female	7	CP2	Negative
1514	Manakara	950	Female	7	CP2	Negative
1515	Manakara	950	Female	6	CP1	Negative
1516	Manakara	992	Male	7	CP2	Negative
1517	Manakara	992	Male	7	CP2	Negative
1518	Manakara	992	Female	6	CP1	Negative
1519	Manakara	992	Female	6	CP1	Negative
1520	Manakara	992	Male	7	CP2	Negative
1521	Manakara	992	Male	7	CP2	Negative
1522	Manakara	992	Female	7	CP2	Negative
1523	Manakara	992	Female	7	CP2	Negative
1524	Manakara	992	Female	7	CP2	Negative
1525	Manakara	992	Female	6	CP1	Negative
1526	Manakara	992	Female	7	CP2	Negative
1527	Manakara	992	Female	6	CP1	Negative
1528	Manakara	992	Female	6	CP1	Negative
1529	Manakara	992	Male	7	CP2	Negative
1530	Manakara	992	Male	7	CP2	Negative
1531	Manakara	992	Female	6	CP1	Negative
1532	Manakara	992	Male	6	CP1	Negative
1533	Manakara	992	Female	7	CP2	Negative
1534	Manakara	992	Male	6	CP1	Negative
1535	Manakara	992	Female	6	CP1	Negative
1536	Manakara	992	Female	6	CP1	Negative
1537	Manakara	992	Female	6	CP1	Negative
1538	Manakara	992	Female	7	CP2	Negative
1539	Manakara	992	Male	6	CP1	Negative
1540	Manakara	992	Female	6	CP1	Negative
1541	Manakara	992	Female	7	CP2	Negative
1542	Manakara	992	Female	7	CP2	Negative
1543	Manakara	992	Male	6	CP1	Negative
1544	Manakara	992	Female	7	CP2	Negative
1545	Manakara	992	Female	7	CP2	Negative
1546	Manakara	992	Female	7	CP2	Negative
1547	Manakara	992	Female	7	CP2	Negative
1548	Manakara	992	Female	6	CP1	Negative
1549	Manakara	992	Female	7	CP2	Negative
1550	Manakara	992	Male	7	CP2	Negative
1551	Manakara	992	Male	7	CP2	Negative
1552	Manakara	992	Male	7	CP2	Negative
1553	Manakara	992	Male	7	CP1	Negative
1554	Manakara	992	Male	6	CP1	Negative
1555	Manakara	992	Male	7	CP1	Negative
1556	Manakara	992	Female	7	CP2	Negative
1557	Manakara	992	Female	7	CP2	Negative
1558	Manakara	992	Male	6	CP1	Negative
1559	Manakara	992	Female	7	CP2	Negative
1560	Manakara	992	Female	6	CP1	Negative
1561	Manakara	992	Female	6	CP1	Negative
1562	Manakara	992	Female	7	CP2	Negative
1563	Manakara	992	Female	7	CP2	Negative
1564	Manakara	992	Male	7	CP2	Negative
1565	Manakara	992	Male	7	CP2	Negative
1566	Manakara	992	Female	7	CP2	Negative
1567	Manakara	992	Female	7	CP2	Negative
1568	Manakara	992	Female	7	CP2	Negative
1569	Manakara	992	Female	6	CP1	Negative
1570	Manakara	992	Female	6	CP1	Negative
1571	Manakara	992	Female	7	CP2	Negative
1572	Manakara	992	Female	7	CP2	Negative
1573	Manakara	992	Female	6	CP1	Negative
1574	Manakara	992	Male	6	CP1	Negative
1575	Manakara	992	Female	6	CP1	Negative
1576	Manakara	992	Male	6	CP1	Negative
1577	Manakara	992	Female	7	CP2	Negative
1578	Manakara	992	Female	7	CP2	Negative
1579	Manakara	992	Male	7	CP2	Negative
1580	Manakara	992	Female	7	CP2	Negative
1581	Manakara	992	Female	7	CP2	Negative
1582	Manakara	992	Male	7	CP2	Negative
1583	Manakara	992	Female	6	CP1	Negative
1584	Manakara	992	Male	7	CP2	Negative
1585	Manakara	992	Male	6	CP1	Negative
1586	Manakara	992	Male	6	CP1	Negative
1587	Manakara	992	Male	6	CP1	Negative
1588	Manakara	992	Female	6	CP1	Negative
1589	Manakara	992	Female	6	CP1	Negative
1590	Manakara	992	Female	6	CP1	Negative
1591	Manakara	992	Female	6	CP1	Negative
1592	Manakara	992	Female	6	CP1	Negative
1593	Manakara	992	Male	7	CP2	Negative
1594	Manakara	992	Male	6	CP1	Negative
1595	Manakara	992	Male	6	CP1	Negative
1596	Manakara	992	Female	6	CP1	Negative
1597	Vohipeno	1031	Male	7	CP2	Negative
1598	Vohipeno	1031	Male	7	CP2	Negative
1599	Vohipeno	1031	Male	7	CP1	Negative
1600	Vohipeno	1031	Female	6	CP1	Negative
1601	Vohipeno	1031	Female	7	CP1	Negative
1602	Vohipeno	1031	Female	6	CP1	Negative
1603	Vohipeno	1031	Female	7	CP2	Negative
1604	Vohipeno	1071	Male	8	CP2	Negative
1605	Vohipeno	1071	Male	8	CP2	Negative
1606	Vohipeno	1071	Male	7	CP2	Negative
1607	Vohipeno	1071	Male	8	CP2	Negative
1608	Vohipeno	1071	Male	7	CP2	Negative
1609	Vohipeno	1071	Male	8	CP2	Negative
1610	Vohipeno	1071	Male	8	CP2	Negative
1611	Vohipeno	1071	Female	8	CP2	Negative
1612	Vohipeno	1071	Male	8	CP2	Negative
1613	Vohipeno	1071	Male	6	CP2	Negative
1614	Vohipeno	1071	Male	7	CP2	Negative
1615	Vohipeno	1071	Male	8	CP2	Negative
1616	Vohipeno	1071	Male	6	CP2	Negative
1617	Vohipeno	1071	Male	8	CP2	Negative
1618	Vohipeno	1071	Male	7	CP2	Negative
1619	Vohipeno	1071	Male	6	CP2	Negative
1620	Vohipeno	1071	Male	6	CP2	Negative
1621	Vohipeno	1071	Male	6	CP2	Negative
1622	Vohipeno	1071	Female	7	CP2	Negative
1623	Vohipeno	1071	Female	8	CP2	Negative
1624	Vohipeno	1071	Female	7	CP2	Negative
1625	Vohipeno	1071	Female	7	CP2	Negative
1626	Vohipeno	1071	Female	8	CP2	Negative
1627	Vohipeno	1071	Female	7	CP2	Negative
1628	Vohipeno	1071	Male	7	CP2	Negative
1629	Vohipeno	1112	Female	8	CP1	Negative
1630	Vohipeno	1112	Female	8	CP1	Negative
1631	Vohipeno	1112	Female	6	CP1	Negative
1632	Vohipeno	1112	Female	7	CP1	Negative
1633	Vohipeno	1112	Female	6	CP1	Negative
1634	Vohipeno	1112	Female	7	CP1	Negative
1635	Vohipeno	1112	Female	6	CP1	Negative
1636	Vohipeno	1112	Female	7	CP1	Negative
1637	Vohipeno	1112	Female	6	CP1	Negative
1638	Vohipeno	1112	Male	6	CP1	Negative
1639	Vohipeno	1112	Female	6	CP1	Negative
1640	Vohipeno	1112	Female	6	CP1	Negative
1641	Vohipeno	1112	Female	7	CP1	Negative
1642	Vohipeno	1112	Female	6	CP1	Negative
1643	Vohipeno	1112	Male	6	CP1	Negative
1644	Vohipeno	1112	Male	7	CP1	Negative
1645	Vohipeno	1112	Male	6	CP1	Negative
1646	Vohipeno	1112	Male	6	CP1	Negative
1647	Vohipeno	1112	Male	6	CP1	Negative
1648	Vohipeno	1112	Male	7	CP1	Negative
1649	Vohipeno	1112	Male	7	CP1	Negative
1650	Vohipeno	1112	Male	6	CP1	Negative
1651	Vohipeno	1112	Male	6	CP1	Negative
1652	Vohipeno	1112	Female	6	CP1	Negative
1653	Vohipeno	1112	Female	6	CP1	Negative
1654	Vohipeno	1112	Female	6	CP1	Negative
1655	Vohipeno	1112	Female	6	CP1	Negative
1656	Vohipeno	1112	Female	6	CP1	Negative
1657	Vohipeno	1112	Female	6	CP1	Negative
1658	Vohipeno	1112	Male	6	CP1	Negative
1659	Vohipeno	1112	Male	6	CP1	Negative
1660	Vohipeno	1112	Male	6	CP1	Negative
1661	Vohipeno	1112	Male	7	CP1	Negative
1662	Vohipeno	1112	Male	6	CP1	Negative
1663	Vohipeno	1112	Male	6	CP1	Negative
1664	Vohipeno	1112	Male	6	CP1	Negative
1665	Vohipeno	1112	Male	6	CP1	Negative
1666	Vohipeno	1112	Female	6	CP1	Negative
1667	Vohipeno	1112	Male	6	CP1	Negative
1668	Vohipeno	1112	Male	7	CP1	Negative
1669	Vohipeno	1112	Male	6	CP1	Negative
1670	Vohipeno	1112	Male	6	CP1	Negative
1671	Vohipeno	1112	Female	6	CP1	Negative
1672	Vohipeno	1112	Female	6	CP1	Negative
1673	Vohipeno	1112	Male	6	CP1	Negative
1674	Vohipeno	1112	Male	6	CP1	Negative
1675	Vohipeno	1112	Female	6	CP1	Negative
1676	Vohipeno	1112	Male	6	CP1	Negative
1677	Vohipeno	1112	Male	7	CP2	Negative
1678	Vohipeno	1112	Male	7	CP2	Negative
1679	Vohipeno	1112	Male	7	CP2	Negative
1680	Vohipeno	1112	Female	7	CP2	Negative
1681	Vohipeno	1112	Female	7	CP2	Negative
1682	Vohipeno	1112	Female	8	CP2	Negative
1683	Vohipeno	1112	Female	7	CP2	Negative
1684	Vohipeno	1112	Female	7	CP2	Negative
1685	Vohipeno	1112	Female	7	CP2	Negative
1686	Vohipeno	1112	Male	7	CP2	Negative
1687	Vohipeno	1112	Male	7	CP2	Negative
1688	Vohipeno	1112	Male	8	CP2	Negative
1689	Vohipeno	1112	Male	7	CP2	Negative
1690	Vohipeno	1112	Male	7	CP2	Negative
1691	Vohipeno	1112	Male	8	CP2	Negative
1692	Vohipeno	1112	Male	7	CP2	Negative
1693	Vohipeno	1112	Male	8	CP2	Negative
1694	Vohipeno	1112	Male	7	CP2	Negative
1695	Vohipeno	1112	Male	7	CP2	Negative
1696	Vohipeno	1112	Male	7	CP2	Negative
1697	Vohipeno	1112	Male	7	CP2	Negative
1698	Vohipeno	1112	Male	8	CP2	Negative
1699	Vohipeno	1112	Male	7	CP2	Negative
1700	Vohipeno	1112	Female	7	CP2	Negative
1701	Vohipeno	1112	Male	7	CP2	Negative
1702	Vohipeno	1112	Female	7	CP2	Negative
1703	Vohipeno	1112	Female	7	CP2	Negative
1704	Vohipeno	1112	Female	7	CP2	Negative
1705	Vohipeno	1112	Female	7	CP2	Negative
1706	Vohipeno	1112	Female	8	CP2	Negative
1707	Vohipeno	1112	Female	7	CP2	Negative
1708	Vohipeno	1112	Male	7	CP2	Negative
1709	Vohipeno	1112	Male	8	CP2	Negative
1710	Vohipeno	1112	Male	7	CP2	Negative
1711	Vohipeno	1112	Male	7	CP2	Negative
1712	Vohipeno	1112	Male	7	CP2	Negative
1713	Vohipeno	1112	Male	7	CP2	Negative
1714	Vohipeno	1112	Female	6	CP1	Negative
1715	Vohipeno	1112	Female	6	CP1	Negative
1716	Vohipeno	1112	Female	6	CP1	Negative
1717	Vohipeno	1112	Female	6	CP1	Negative
1718	Vohipeno	1112	Male	6	CP1	Negative
1719	Vohipeno	1112	Male	6	CP1	Negative
1720	Vohipeno	1112	Male	6	CP1	Negative
1721	Vohipeno	1112	Female	6	CP1	Negative
1722	Vohipeno	1112	Male	7	CP1	Negative
1723	Vohipeno	1112	Female	6	CP1	Negative
1724	Vohipeno	1112	Female	6	CP1	Negative
1725	Vohipeno	1112	Male	6	CP1	Negative
1726	Vohipeno	1112	Male	7	CP2	Negative
1727	Vohipeno	1153	Male	7	CP1	Negative
1728	Vohipeno	1153	Male	7	CP2	Negative
1729	Vohipeno	1153	Male	7	CP2	Negative
1730	Vohipeno	1153	Male	7	CP2	Negative
1731	Vohipeno	1153	Female	6	CP1	Negative
1732	Vohipeno	1153	Male	7	CP2	Negative
1733	Vohipeno	1153	Female	6	CP2	Negative
1734	Vohipeno	1153	Male	7	CP2	Negative
1735	Vohipeno	1153	Female	6	CP1	Negative
1736	Vohipeno	1153	Male	6	CP1	Negative
1737	Vohipeno	1153	Male	7	CP2	Negative
1738	Vohipeno	1153	Male	6	CP1	Negative
1739	Vohipeno	1153	Female	6	CP1	Negative
1740	Vohipeno	1153	Male	7	CP1	Negative
1741	Vohipeno	1153	Male	6	CP1	Negative
1742	Vohipeno	1153	Female	6	CP1	Negative
1743	Vohipeno	1153	Female	6	CP1	Negative
1744	Vohipeno	1153	Female	6	CP1	Negative
1745	Vohipeno	1153	Female	7	CP1	Negative
1746	Vohipeno	1153	Female	7	CP1	Negative
1747	Vohipeno	1153	Female	7	CP1	Negative
1748	Vohipeno	1153	Female	6	CP1	Negative
1749	Vohipeno	1153	Female	7	CP1	Negative
1750	Vohipeno	1153	Female	7	CP1	Negative
1751	Vohipeno	1153	Female	6	CP1	Negative
1752	Vohipeno	1153	Female	6	CP1	Negative
1753	Vohipeno	1153	Female	6	CP1	Negative
1754	Vohipeno	1153	Female	7	CP1	Negative
1755	Vohipeno	1153	Female	6	CP1	Negative
1756	Vohipeno	1153	Female	8	CP1	Negative
1757	Vohipeno	1153	Male	6	CP1	Negative
1758	Vohipeno	1153	Male	7	CP1	Negative
1759	Vohipeno	1153	Female	6	CP1	Negative
1760	Vohipeno	1153	Male	7	CP1	Negative
1761	Vohipeno	1153	Male	7	CP1	Negative
1762	Vohipeno	1153	Male	6	CP1	Negative
1763	Vohipeno	1153	Male	7	CP1	Negative
1764	Vohipeno	1153	Male	6	CP1	Negative
1765	Vohipeno	1153	Female	7	CP1	Negative
1766	Vohipeno	1153	Female	7	CP1	Negative
1767	Vohipeno	1153	Male	6	CP1	Negative
1768	Vohipeno	1153	Male	6	CP1	Negative
1769	Vohipeno	1153	Male	7	CP1	Negative
1770	Vohipeno	1153	Female	6	CP1	Negative
1771	Vohipeno	1153	Male	7	CP1	Negative
1772	Vohipeno	1153	Male	7	CP1	Negative
1773	Vohipeno	1153	Male	7	CP1	Negative
1774	Vohipeno	1193	Male	7	CP2	Negative
1775	Vohipeno	1193	Female	6	CP1	Negative
1776	Vohipeno	1193	Female	7	CP2	Negative
1777	Vohipeno	1193	Male	7	CP2	Negative
1778	Vohipeno	1193	Male	7	CP2	Negative
1779	Vohipeno	1193	Female	7	CP2	Negative
1780	Vohipeno	1193	Female	7	CP2	Negative
1781	Vohipeno	1193	Female	6	CP1	Negative
1782	Vohipeno	1193	Female	7	CP1	Negative
1783	Vohipeno	1193	Female	6	CP1	Negative
1784	Vohipeno	1193	Female	6	CP1	Negative
1785	Vohipeno	1193	Female	7	CP2	Negative
1786	Vohipeno	1193	Female	7	CP2	Negative
1787	Vohipeno	1193	Male	7	CP1	Negative
1788	Vohipeno	1193	Male	7	CP2	Negative
1789	Vohipeno	1193	Male	6	CP1	Negative
1790	Vohipeno	1193	Male	7	CP2	Negative
1791	Vohipeno	1193	Male	6	CP1	Negative
1792	Vohipeno	1193	Female	7	CP2	Negative
1793	Vohipeno	1193	Female	6	CP1	Negative
1794	Vohipeno	1193	Male	6	CP1	Negative
1795	Vohipeno	1193	Female	7	CP1	Negative
1796	Vohipeno	1193	Male	7	CP2	Negative
1797	Vohipeno	1193	Female	7	CP2	Negative
1798	Vohipeno	1193	Male	7	CP1	Negative
1799	Vohipeno	1193	Female	6	CP1	Negative
1800	Vohipeno	1193	Female	6	CP1	Negative
1801	Vohipeno	1193	Female	6	CP1	Negative
1802	Vohipeno	1193	Male	7	CP2	Negative
1803	Vohipeno	1193	Male	7	CP2	Negative
1804	Vohipeno	1193	Male	6	CP1	Negative
1805	Vohipeno	1193	Male	7	CP2	Negative
1806	Vohipeno	1193	Male	7	CP2	Negative
1807	Vohipeno	1193	Female	7	CP2	Negative
1808	Vohipeno	1193	Male	7	CP2	Negative
1809	Vohipeno	1193	Male	7	CP2	Negative
1810	Vohipeno	1193	Male	7	CP2	Negative
1811	Vohipeno	1193	Male	7	CP2	Negative
1812	Vohipeno	1193	Female	7	CP2	Negative
1813	Vohipeno	1193	Male	7	CP2	Negative
1814	Vohipeno	1193	Male	7	CP2	Negative
1815	Vohipeno	1193	Male	7	CP2	Negative
1816	Vohipeno	1193	Male	7	CP2	Negative
1817	Vohipeno	1193	Male	7	CP2	Negative
1818	Vohipeno	1193	Female	7	CP2	Negative
1819	Vohipeno	1193	Female	7	CP2	Negative
1820	Vohipeno	1193	Female	7	CP2	Negative
1821	Vohipeno	1193	Female	7	CP2	Negative
1822	Vohipeno	1193	Female	7	CP2	Negative
1823	Vohipeno	1193	Male	7	CP2	Negative
1824	Vohipeno	1193	Male	7	CP2	Negative
1825	Vohipeno	1193	Male	7	CP2	Negative

## Sheet: Sentinel and Spot-Check Sites
ID	District	Commune	Site ID	Site	Age	Sex	Attended school	Education level	Owns bednet	Sleeps under bednet	Sleeps everyday under bednet	Has taken MDA in the last 5 years	Has taken MDA in the last Yes2 months	Knows about LF	Source: Health staff	Source: CHW	Source: Other people	Source: Radio	Source: Newspaper	Source: TV	Knows about LF MDA	FTS result	Microfilaraemia
FI04201	IFANADIANA	FASINTSARA	IFD_SS	Sentinel	24	Female	No	No education	Yes	Yes	Yes	No	No	Yes	No	No	Yes	No	No	No	Yes	Negative	NA
FI04202	IFANADIANA	FASINTSARA	IFD_SS	Sentinel	36	Male	Yes	Primary	Yes	Yes	Yes	Yes	Yes	Yes	No	No	Yes	No	No	No	Yes	Negative	NA
FI04203	IFANADIANA	FASINTSARA	IFD_SS	Sentinel	10	Male	Yes	Primary	Yes	Yes	Yes	Yes	Yes	No	No	No	No	No	No	No	No	Negative	NA
FI04204	IFANADIANA	FASINTSARA	IFD_SS	Sentinel	40	Female	Yes	Primary	Yes	Yes	Yes	Yes	Yes	Yes	No	Yes	No	No	No	No	Yes	Negative	NA
FI04205	IFANADIANA	FASINTSARA	IFD_SS	Sentinel	26	Female	Yes	Primary	Yes	Yes	Yes	Yes	Yes	Yes	No	Yes	No	No	No	No	Yes	Negative	NA
FI04206	IFANADIANA	FASINTSARA	IFD_SS	Sentinel	8	Female	Yes	Primary	Yes	Yes	Yes	Yes	Yes	No	No	No	No	No	No	No	No	Negative	NA
FI04207	IFANADIANA	FASINTSARA	IFD_SS	Sentinel	5	Female	Yes	Primary	Yes	Yes	Yes	NA	NA	NA	NA	NA	NA	NA	NA	NA	NA	Negative	NA
FI04208	IFANADIANA	FASINTSARA	IFD_SS	Sentinel	15	Female	Yes	Secondary or higher	Yes	Yes	Yes	Yes	Yes	No	No	No	No	No	No	No	No	Negative	NA
FI04209	IFANADIANA	FASINTSARA	IFD_SS	Sentinel	9	Female	Yes	Primary	Yes	Yes	Yes	No	No	Yes	No	Yes	No	No	No	No	No	Negative	NA
FI04210	IFANADIANA	FASINTSARA	IFD_SS	Sentinel	44	Male	Yes	Primary	No	No	No	Yes	Yes	Yes	No	No	Yes	No	No	No	Yes	Negative	NA
FI04211	IFANADIANA	FASINTSARA	IFD_SS	Sentinel	32	Male	Yes	Secondary or higher	Yes	Yes	Yes	Yes	No	Yes	Yes	No	Yes	No	No	No	Yes	Negative	NA
FI04212	IFANADIANA	FASINTSARA	IFD_SS	Sentinel	29	Female	Yes	Primary	Yes	Yes	Yes	Yes	No	Yes	Yes	Yes	No	No	No	No	Yes	Negative	NA
FI04213	IFANADIANA	FASINTSARA	IFD_SS	Sentinel	25	Female	Yes	Primary	Yes	Yes	Yes	Yes	No	No	No	No	No	No	No	No	No	Negative	NA
FI04214	IFANADIANA	FASINTSARA	IFD_SS	Sentinel	20	Female	Yes	Secondary or higher	Yes	Yes	Yes	Yes	Yes	No	No	No	No	No	No	No	No	Negative	NA
FI04215	IFANADIANA	FASINTSARA	IFD_SS	Sentinel	45	Male	Yes	Primary	Yes	Yes	Yes	Yes	Yes	Yes	Yes	Yes	Yes	No	No	No	Yes	Negative	NA
FI04216	IFANADIANA	FASINTSARA	IFD_SS	Sentinel	36	Female	Yes	Primary	Yes	Yes	Yes	Yes	No	Yes	Yes	Yes	No	No	No	No	Yes	Negative	NA
FI04217	IFANADIANA	FASINTSARA	IFD_SS	Sentinel	44	Male	Yes	Primary	Yes	Yes	Yes	Yes	Yes	Yes	Yes	Yes	Yes	No	No	No	Yes	Negative	NA
FI04218	IFANADIANA	FASINTSARA	IFD_SS	Sentinel	25	Female	Yes	Secondary or higher	Yes	Yes	Yes	No	No	No	No	No	No	No	No	No	No	Negative	NA
FI04219	IFANADIANA	FASINTSARA	IFD_SS	Sentinel	28	Female	Yes	Secondary or higher	Yes	Yes	Yes	Yes	Yes	No	No	No	No	No	No	No	No	Negative	NA
FI04220	IFANADIANA	FASINTSARA	IFD_SS	Sentinel	23	Female	Yes	Secondary or higher	Yes	Yes	Yes	Yes	Yes	No	No	No	No	No	No	No	No	Negative	NA
FI04221	IFANADIANA	FASINTSARA	IFD_SS	Sentinel	30	Female	Yes	Secondary or higher	Yes	Yes	Yes	Yes	Yes	Yes	No	Yes	No	No	No	No	Yes	Negative	NA
FI04222	IFANADIANA	FASINTSARA	IFD_SS	Sentinel	30	Female	Yes	Primary	Yes	Yes	Yes	Yes	Yes	Yes	Yes	Yes	Yes	No	No	No	Yes	Negative	NA
FI04223	IFANADIANA	FASINTSARA	IFD_SS	Sentinel	56	Male	Yes	Primary	Yes	Yes	Yes	No	No	No	No	No	No	No	No	No	No	Negative	NA
FI04224	IFANADIANA	FASINTSARA	IFD_SS	Sentinel	42	Female	Yes	Primary	Yes	Yes	Yes	Yes	Yes	Yes	No	Yes	Yes	No	No	No	Yes	Negative	NA
FI04225	IFANADIANA	FASINTSARA	IFD_SS	Sentinel	56	Female	Yes	Primary	Yes	Yes	Yes	Yes	Yes	Yes	Yes	Yes	Yes	No	No	No	Yes	Negative	NA
FI04226	IFANADIANA	FASINTSARA	IFD_SS	Sentinel	25	Female	Yes	Primary	Yes	Yes	Yes	Yes	Yes	No	No	No	No	No	No	No	No	Negative	NA
FI04227	IFANADIANA	FASINTSARA	IFD_SS	Sentinel	39	Female	Yes	Primary	Yes	Yes	Yes	Yes	Yes	Yes	No	Yes	Yes	No	No	No	Yes	Negative	NA
FI04228	IFANADIANA	FASINTSARA	IFD_SS	Sentinel	30	Female	Yes	Primary	Yes	Yes	Yes	Yes	No	No	No	No	No	No	No	No	No	Negative	NA
FI04229	IFANADIANA	FASINTSARA	IFD_SS	Sentinel	37	Female	Yes	Primary	Yes	Yes	Yes	Yes	Yes	Yes	No	Yes	No	No	No	No	Yes	Negative	NA
FI04230	IFANADIANA	FASINTSARA	IFD_SS	Sentinel	35	Female	Yes	Primary	Yes	Yes	Yes	Yes	Yes	No	No	No	No	No	No	No	No	Negative	NA
FI04231	IFANADIANA	FASINTSARA	IFD_SS	Sentinel	40	Male	NA	NA	Yes	Yes	Yes	Yes	Yes	No	No	No	No	No	No	No	No	Negative	NA
FI04232	IFANADIANA	FASINTSARA	IFD_SS	Sentinel	19	Male	Yes	Secondary or higher	Yes	Yes	Yes	Yes	No	Yes	No	Yes	No	No	No	No	Yes	Negative	NA
FI04233	IFANADIANA	FASINTSARA	IFD_SS	Sentinel	55	Female	Yes	Primary	Yes	Yes	Yes	Yes	Yes	Yes	No	Yes	No	No	No	No	Yes	Negative	NA
FI04234	IFANADIANA	FASINTSARA	IFD_SS	Sentinel	11	Male	Yes	Primary	Yes	Yes	Yes	Yes	Yes	No	No	No	No	No	No	No	No	Negative	NA
FI04235	IFANADIANA	FASINTSARA	IFD_SS	Sentinel	22	Female	Yes	Secondary or higher	Yes	Yes	Yes	Yes	No	Yes	No	Yes	No	No	No	No	Yes	Negative	NA
FI04236	IFANADIANA	FASINTSARA	IFD_SS	Sentinel	25	Male	Yes	Primary	Yes	Yes	Yes	No	No	Yes	No	Yes	Yes	No	No	No	Yes	Negative	NA
FI04237	IFANADIANA	FASINTSARA	IFD_SS	Sentinel	10	Male	Yes	Primary	Yes	Yes	Yes	Yes	Yes	No	No	No	No	No	No	No	No	Negative	NA
FI04238	IFANADIANA	FASINTSARA	IFD_SS	Sentinel	24	Male	Yes	Secondary or higher	Yes	Yes	Yes	Yes	No	Yes	No	Yes	No	Yes	No	No	Yes	Negative	NA
FI04239	IFANADIANA	FASINTSARA	IFD_SS	Sentinel	28	Male	Yes	Primary	Yes	Yes	Yes	Yes	No	Yes	No	Yes	No	No	No	No	Yes	Negative	NA
FI04240	IFANADIANA	FASINTSARA	IFD_SS	Sentinel	76	Female	No	No education	Yes	Yes	Yes	Yes	Yes	No	No	No	No	No	No	No	No	Negative	NA
FI04241	IFANADIANA	FASINTSARA	IFD_SS	Sentinel	24	Male	Yes	Secondary or higher	Yes	Yes	Yes	Yes	No	Yes	No	Yes	Yes	No	No	No	Yes	Negative	NA
FI04242	IFANADIANA	FASINTSARA	IFD_SS	Sentinel	10	Male	Yes	Primary	Yes	Yes	Yes	Yes	Yes	No	No	No	No	No	No	No	No	Negative	NA
FI04243	IFANADIANA	FASINTSARA	IFD_SS	Sentinel	36	Male	Yes	Primary	Yes	Yes	Yes	Yes	Yes	No	No	No	No	No	No	No	No	Negative	NA
FI04244	IFANADIANA	FASINTSARA	IFD_SS	Sentinel	30	Female	Yes	Primary	Yes	Yes	Yes	Yes	Yes	Yes	No	No	Yes	No	No	No	Yes	Negative	NA
FI04245	IFANADIANA	FASINTSARA	IFD_SS	Sentinel	57	Female	Yes	Secondary or higher	Yes	Yes	Yes	Yes	NA	Yes	No	Yes	No	No	No	No	Yes	Negative	NA
FI04246	IFANADIANA	FASINTSARA	IFD_SS	Sentinel	10	Female	Yes	Primary	Yes	Yes	Yes	No	No	No	No	No	No	No	No	No	No	Negative	NA
FI04247	IFANADIANA	FASINTSARA	IFD_SS	Sentinel	45	Female	Yes	Primary	Yes	Yes	Yes	Yes	Yes	No	No	No	No	No	No	No	No	Negative	NA
FI04248	IFANADIANA	FASINTSARA	IFD_SS	Sentinel	31	Male	Yes	Primary	Yes	Yes	Yes	Yes	Yes	Yes	Yes	No	No	No	No	No	Yes	Negative	NA
FI04249	IFANADIANA	FASINTSARA	IFD_SS	Sentinel	20	Female	No	No education	Yes	Yes	Yes	Yes	Yes	No	No	No	No	No	No	No	No	Negative	NA
FI04250	IFANADIANA	FASINTSARA	IFD_SS	Sentinel	30	Female	No	No education	Yes	Yes	Yes	Yes	Yes	No	No	No	No	No	No	No	No	Negative	NA
FI04251	IFANADIANA	FASINTSARA	IFD_SS	Sentinel	21	Female	Yes	Primary	Yes	Yes	Yes	Yes	No	No	No	No	No	No	No	No	No	Negative	NA
FI04252	IFANADIANA	FASINTSARA	IFD_SS	Sentinel	35	Female	Yes	Primary	Yes	Yes	Yes	Yes	Yes	Yes	Yes	No	No	No	No	No	Yes	Negative	NA
FI04253	IFANADIANA	FASINTSARA	IFD_SS	Sentinel	33	Female	Yes	Primary	Yes	Yes	Yes	Yes	Yes	Yes	Yes	Yes	No	No	No	No	Yes	Negative	NA
FI04254	IFANADIANA	FASINTSARA	IFD_SS	Sentinel	30	Female	Yes	Primary	Yes	Yes	Yes	Yes	Yes	No	No	No	No	No	No	No	No	Negative	NA
FI04255	IFANADIANA	FASINTSARA	IFD_SS	Sentinel	40	Female	NA	NA	Yes	Yes	Yes	No	No	No	No	No	No	No	No	No	No	Positive	Negative
FI04256	IFANADIANA	FASINTSARA	IFD_SS	Sentinel	66	Male	Yes	Primary	Yes	Yes	Yes	Yes	Yes	Yes	Yes	No	No	No	No	No	Yes	Negative	NA
FI04257	IFANADIANA	FASINTSARA	IFD_SS	Sentinel	25	Female	No	No education	Yes	Yes	Yes	Yes	Yes	No	No	No	No	No	No	No	No	Negative	NA
FI04258	IFANADIANA	FASINTSARA	IFD_SS	Sentinel	55	Female	Yes	Secondary or higher	Yes	Yes	Yes	Yes	Yes	Yes	No	No	Yes	No	No	No	Yes	Negative	NA
FI04259	IFANADIANA	FASINTSARA	IFD_SS	Sentinel	22	Female	Yes	Primary	Yes	Yes	Yes	Yes	Yes	Yes	Yes	No	No	No	No	No	Yes	Negative	NA
FI04260	IFANADIANA	FASINTSARA	IFD_SS	Sentinel	28	Female	Yes	Primary	Yes	Yes	Yes	Yes	Yes	No	No	No	No	No	No	No	No	Negative	NA
FI04261	IFANADIANA	FASINTSARA	IFD_SS	Sentinel	18	Female	Yes	Primary	Yes	Yes	Yes	Yes	Yes	No	No	No	No	No	No	No	No	Negative	NA
FI04262	IFANADIANA	FASINTSARA	IFD_SS	Sentinel	18	Female	Yes	Secondary or higher	Yes	Yes	Yes	Yes	Yes	Yes	No	Yes	No	No	No	No	Yes	Negative	NA
FI04263	IFANADIANA	FASINTSARA	IFD_SS	Sentinel	20	Female	Yes	Secondary or higher	Yes	Yes	Yes	Yes	Yes	Yes	No	No	Yes	No	No	No	Yes	Negative	NA
FI04264	IFANADIANA	FASINTSARA	IFD_SS	Sentinel	23	Female	Yes	Secondary or higher	Yes	Yes	Yes	No	Yes	Yes	No	No	Yes	No	No	No	No	Negative	NA
FI04265	IFANADIANA	FASINTSARA	IFD_SS	Sentinel	5	Female	No	No education	No	No	No	Yes	Yes	No	No	No	No	No	No	No	No	Negative	NA
FI04266	IFANADIANA	FASINTSARA	IFD_SS	Sentinel	6	Female	Yes	Primary	Yes	Yes	Yes	Yes	Yes	No	No	No	No	No	No	No	No	Negative	NA
FI04267	IFANADIANA	FASINTSARA	IFD_SS	Sentinel	25	Female	Yes	Primary	Yes	Yes	Yes	Yes	Yes	Yes	Yes	Yes	No	No	No	No	Yes	Negative	NA
FI04268	IFANADIANA	FASINTSARA	IFD_SS	Sentinel	21	Female	Yes	Secondary or higher	Yes	Yes	Yes	Yes	Yes	No	No	No	No	No	No	No	No	Negative	NA
FI04269	IFANADIANA	FASINTSARA	IFD_SS	Sentinel	36	Female	Yes	Secondary or higher	Yes	Yes	Yes	Yes	Yes	No	No	No	No	No	No	No	No	Negative	NA
FI04270	IFANADIANA	FASINTSARA	IFD_SS	Sentinel	20	Female	Yes	Secondary or higher	Yes	Yes	Yes	Yes	Yes	No	No	No	No	No	No	No	No	Negative	NA
FI04271	IFANADIANA	FASINTSARA	IFD_SS	Sentinel	37	Male	Yes	Primary	Yes	Yes	Yes	No	No	Yes	No	No	Yes	No	No	No	No	Negative	NA
FI04272	IFANADIANA	FASINTSARA	IFD_SS	Sentinel	34	Male	Yes	Primary	Yes	Yes	Yes	Yes	Yes	No	No	No	No	No	No	No	No	Positive	Negative
FI04273	IFANADIANA	FASINTSARA	IFD_SS	Sentinel	39	Female	Yes	Primary	Yes	Yes	Yes	Yes	Yes	No	No	No	No	No	No	No	No	Negative	NA
FI04274	IFANADIANA	FASINTSARA	IFD_SS	Sentinel	19	Female	Yes	Secondary or higher	Yes	Yes	Yes	Yes	Yes	Yes	No	No	Yes	No	No	No	Yes	Negative	NA
FI04275	IFANADIANA	FASINTSARA	IFD_SS	Sentinel	45	Female	Yes	Primary	Yes	Yes	Yes	Yes	Yes	No	No	No	No	No	No	No	No	Negative	NA
FI04276	IFANADIANA	FASINTSARA	IFD_SS	Sentinel	40	Female	Yes	Primary	Yes	Yes	Yes	Yes	Yes	Yes	No	Yes	No	No	No	No	No	Negative	NA
FI04277	IFANADIANA	FASINTSARA	IFD_SS	Sentinel	54	Female	No	No education	Yes	Yes	Yes	No	Yes	No	No	No	No	No	No	No	No	Negative	NA
FI04278	IFANADIANA	FASINTSARA	IFD_SS	Sentinel	40	Female	No	No education	Yes	Yes	Yes	Yes	Yes	Yes	No	Yes	No	No	No	No	No	Negative	NA
FI04279	IFANADIANA	FASINTSARA	IFD_SS	Sentinel	19	NA	Yes	Secondary or higher	Yes	Yes	Yes	Yes	Yes	No	No	No	No	No	No	No	No	Negative	NA
FI04280	IFANADIANA	FASINTSARA	IFD_SS	Sentinel	12	Female	Yes	Primary	Yes	Yes	Yes	No	No	No	No	No	No	No	No	No	No	Negative	NA
FI04281	IFANADIANA	FASINTSARA	IFD_SS	Sentinel	13	Female	Yes	Primary	Yes	Yes	Yes	Yes	Yes	No	No	No	No	No	No	No	No	Negative	NA
FI04282	IFANADIANA	FASINTSARA	IFD_SS	Sentinel	9	Female	Yes	Primary	Yes	Yes	Yes	No	Yes	No	No	No	No	No	No	No	No	Negative	NA
FI04283	IFANADIANA	FASINTSARA	IFD_SS	Sentinel	50	Female	Yes	Secondary or higher	Yes	Yes	Yes	Yes	Yes	Yes	No	No	Yes	No	No	No	Yes	Negative	NA
FI04284	IFANADIANA	FASINTSARA	IFD_SS	Sentinel	7	Male	Yes	Primary	Yes	Yes	Yes	Yes	Yes	NA	NA	NA	NA	NA	NA	NA	NA	Negative	NA
FI04285	IFANADIANA	FASINTSARA	IFD_SS	Sentinel	18	Female	Yes	Primary	Yes	Yes	Yes	No	No	No	No	No	No	No	No	No	No	Negative	NA
FI04286	IFANADIANA	FASINTSARA	IFD_SS	Sentinel	14	Female	Yes	Primary	Yes	Yes	Yes	Yes	Yes	No	No	No	No	No	No	No	No	Negative	NA
FI04287	IFANADIANA	FASINTSARA	IFD_SS	Sentinel	20	NA	Yes	Secondary or higher	Yes	Yes	Yes	Yes	Yes	No	No	No	No	No	No	No	No	Negative	NA
FI04288	IFANADIANA	FASINTSARA	IFD_SS	Sentinel	48	Female	No	No education	Yes	Yes	Yes	Yes	Yes	No	No	No	No	No	No	No	No	Negative	NA
FI04289	IFANADIANA	FASINTSARA	IFD_SS	Sentinel	18	Female	Yes	Secondary or higher	Yes	Yes	Yes	Yes	Yes	No	No	No	No	No	No	No	No	Negative	NA
FI04290	IFANADIANA	FASINTSARA	IFD_SS	Sentinel	12	Female	Yes	Primary	Yes	Yes	Yes	Yes	Yes	No	No	No	No	No	No	No	No	Negative	NA
FI04291	IFANADIANA	FASINTSARA	IFD_SS	Sentinel	59	Female	Yes	Primary	Yes	Yes	Yes	Yes	No	Yes	No	No	Yes	No	No	No	No	Negative	NA
FI04292	IFANADIANA	FASINTSARA	IFD_SS	Sentinel	50	Female	Yes	Primary	Yes	Yes	Yes	Yes	Yes	Yes	No	No	Yes	No	No	No	Yes	Negative	NA
FI04293	IFANADIANA	FASINTSARA	IFD_SS	Sentinel	12	Male	Yes	Primary	Yes	Yes	Yes	Yes	Yes	No	No	No	No	No	No	No	No	Negative	NA
FI04294	IFANADIANA	FASINTSARA	IFD_SS	Sentinel	44	Female	Yes	Primary	Yes	Yes	Yes	Yes	Yes	Yes	Yes	No	Yes	No	No	No	Yes	Negative	NA
FI04295	IFANADIANA	FASINTSARA	IFD_SS	Sentinel	25	Male	No	No education	Yes	Yes	Yes	Yes	Yes	Yes	No	No	Yes	No	No	No	Yes	Negative	NA
FI04296	IFANADIANA	FASINTSARA	IFD_SS	Sentinel	40	Female	Yes	Primary	Yes	Yes	Yes	Yes	Yes	Yes	No	No	Yes	No	No	No	Yes	Negative	NA
FI04297	IFANADIANA	FASINTSARA	IFD_SS	Sentinel	37	Female	Yes	Primary	No	No	No	Yes	Yes	Yes	No	No	Yes	No	No	No	Yes	Negative	NA
FI04298	IFANADIANA	FASINTSARA	IFD_SS	Sentinel	6	Female	Yes	Primary	Yes	Yes	Yes	Yes	Yes	No	No	No	No	No	No	No	No	Negative	NA
FI04299	IFANADIANA	FASINTSARA	IFD_SS	Sentinel	11	Male	Yes	Primary	Yes	Yes	Yes	Yes	Yes	No	No	No	No	No	No	No	No	Negative	NA
FI04300	IFANADIANA	FASINTSARA	IFD_SS	Sentinel	51	Female	Yes	Primary	Yes	Yes	Yes	Yes	Yes	Yes	No	Yes	No	No	No	No	Yes	Negative	NA
FI04301	IFANADIANA	FASINTSARA	IFD_SS	Sentinel	26	Female	Yes	Primary	Yes	Yes	Yes	Yes	Yes	Yes	No	Yes	Yes	No	No	No	Yes	Negative	NA
FI04302	IFANADIANA	FASINTSARA	IFD_SS	Sentinel	25	Female	Yes	Primary	Yes	Yes	Yes	Yes	No	Yes	No	Yes	No	No	No	No	Yes	Negative	NA
FI04303	IFANADIANA	FASINTSARA	IFD_SS	Sentinel	13	Female	Yes	Primary	Yes	Yes	Yes	Yes	Yes	No	No	No	No	No	No	No	No	Negative	NA
FI04304	IFANADIANA	FASINTSARA	IFD_SS	Sentinel	6	Male	Yes	Primary	Yes	Yes	Yes	No	No	No	No	No	No	No	No	No	No	Negative	NA
FI04305	IFANADIANA	FASINTSARA	IFD_SS	Sentinel	23	Female	Yes	Secondary or higher	Yes	Yes	Yes	No	No	No	No	No	No	No	No	No	No	Negative	NA
FI04306	IFANADIANA	FASINTSARA	IFD_SS	Sentinel	43	Female	Yes	Primary	Yes	Yes	Yes	Yes	No	No	No	No	No	No	No	No	No	Negative	NA
FI04307	IFANADIANA	FASINTSARA	IFD_SS	Sentinel	33	Female	No	No education	Yes	Yes	Yes	Yes	Yes	Yes	No	No	Yes	No	No	No	Yes	Negative	NA
FI04308	IFANADIANA	FASINTSARA	IFD_SS	Sentinel	14	Female	Yes	Primary	Yes	Yes	Yes	Yes	Yes	No	No	No	No	No	No	No	No	Negative	NA
FI04309	IFANADIANA	FASINTSARA	IFD_SS	Sentinel	12	Female	Yes	Primary	Yes	Yes	Yes	Yes	Yes	No	No	No	No	No	No	No	No	Negative	NA
FI04310	IFANADIANA	FASINTSARA	IFD_SS	Sentinel	38	Male	Yes	Primary	Yes	Yes	Yes	Yes	No	Yes	No	No	Yes	No	No	No	No	Negative	NA
FI04311	IFANADIANA	FASINTSARA	IFD_SS	Sentinel	9	Female	Yes	Primary	Yes	Yes	Yes	Yes	Yes	No	No	No	No	No	No	No	No	Negative	NA
FI04312	IFANADIANA	FASINTSARA	IFD_SS	Sentinel	58	Female	No	No education	Yes	Yes	Yes	Yes	Yes	Yes	No	No	Yes	No	No	No	No	Negative	NA
FI04313	IFANADIANA	FASINTSARA	IFD_SS	Sentinel	18	Male	Yes	Secondary or higher	Yes	Yes	Yes	Yes	Yes	Yes	No	Yes	No	No	No	No	Yes	Negative	NA
FI04314	IFANADIANA	FASINTSARA	IFD_SS	Sentinel	35	Female	No	No education	Yes	Yes	Yes	No	No	No	No	No	No	No	No	No	No	Negative	NA
FI04315	IFANADIANA	FASINTSARA	IFD_SS	Sentinel	20	Male	Yes	Primary	Yes	Yes	Yes	No	No	No	No	No	No	No	No	No	No	Negative	NA
FI04316	IFANADIANA	FASINTSARA	IFD_SS	Sentinel	5	Female	Yes	Primary	Yes	Yes	Yes	No	No	No	No	No	No	No	No	No	No	Negative	NA
FI04317	IFANADIANA	FASINTSARA	IFD_SS	Sentinel	58	Male	No	No education	Yes	Yes	Yes	Yes	Yes	Yes	No	No	Yes	No	No	No	Yes	Positive	Negative
FI04318	IFANADIANA	FASINTSARA	IFD_SS	Sentinel	10	Male	Yes	Primary	Yes	Yes	Yes	Yes	Yes	No	No	No	No	No	No	No	No	Negative	NA
FI04319	IFANADIANA	FASINTSARA	IFD_SS	Sentinel	23	Male	Yes	Secondary or higher	Yes	Yes	Yes	No	No	No	No	No	No	No	No	No	No	Negative	NA
FI04320	IFANADIANA	FASINTSARA	IFD_SS	Sentinel	5	NA	Yes	Primary	Yes	Yes	Yes	No	No	No	No	No	No	No	No	No	No	Negative	NA
FI04321	IFANADIANA	FASINTSARA	IFD_SS	Sentinel	64	Male	Yes	Secondary or higher	Yes	Yes	Yes	Yes	Yes	Yes	No	No	Yes	No	No	No	Yes	Negative	NA
FI04322	IFANADIANA	FASINTSARA	IFD_SS	Sentinel	30	Female	No	No education	Yes	Yes	Yes	No	No	No	No	No	No	No	No	No	No	Negative	NA
FI04323	IFANADIANA	FASINTSARA	IFD_SS	Sentinel	11	Female	Yes	Primary	Yes	Yes	Yes	Yes	Yes	No	No	No	No	No	No	No	No	Negative	NA
FI04324	IFANADIANA	FASINTSARA	IFD_SS	Sentinel	13	Male	Yes	Primary	Yes	Yes	Yes	Yes	Yes	No	No	No	No	No	No	No	No	Negative	NA
FI04325	IFANADIANA	FASINTSARA	IFD_SS	Sentinel	11	Male	Yes	Primary	Yes	Yes	No	Yes	Yes	No	No	No	No	No	No	No	No	Negative	NA
FI04326	IFANADIANA	FASINTSARA	IFD_SS	Sentinel	9	Male	Yes	Primary	Yes	Yes	No	Yes	Yes	No	No	No	No	No	No	No	No	Negative	NA
FI04327	IFANADIANA	FASINTSARA	IFD_SS	Sentinel	7	Male	Yes	Primary	Yes	Yes	Yes	Yes	Yes	No	No	No	No	No	No	No	No	Negative	NA
FI04328	IFANADIANA	FASINTSARA	IFD_SS	Sentinel	8	Female	Yes	Primary	Yes	Yes	Yes	No	No	No	No	No	No	No	No	No	No	Negative	NA
FI04329	IFANADIANA	FASINTSARA	IFD_SS	Sentinel	41	Female	Yes	Primary	Yes	Yes	Yes	Yes	Yes	Yes	No	No	Yes	No	No	No	No	Negative	NA
FI04330	IFANADIANA	FASINTSARA	IFD_SS	Sentinel	25	Female	Yes	Primary	Yes	Yes	Yes	Yes	Yes	No	No	No	No	No	No	No	No	Negative	NA
FI04331	IFANADIANA	FASINTSARA	IFD_SS	Sentinel	20	Female	Yes	Primary	Yes	Yes	Yes	Yes	Yes	No	No	No	No	No	No	No	No	Negative	NA
FI04332	IFANADIANA	FASINTSARA	IFD_SS	Sentinel	5	Male	Yes	Primary	Yes	Yes	Yes	Yes	Yes	No	No	No	No	No	No	No	No	Negative	NA
FI04333	IFANADIANA	FASINTSARA	IFD_SS	Sentinel	9	Female	Yes	Primary	Yes	Yes	Yes	Yes	Yes	No	No	No	No	No	No	No	No	Negative	NA
FI04334	IFANADIANA	FASINTSARA	IFD_SS	Sentinel	46	Female	Yes	Primary	Yes	Yes	Yes	Yes	Yes	Yes	No	No	Yes	No	No	No	Yes	Negative	NA
FI04335	IFANADIANA	FASINTSARA	IFD_SS	Sentinel	8	Male	Yes	Primary	Yes	Yes	No	Yes	Yes	No	No	No	No	No	No	No	No	Negative	NA
FI04336	IFANADIANA	FASINTSARA	IFD_SS	Sentinel	11	Female	Yes	Primary	Yes	Yes	Yes	Yes	Yes	No	No	No	No	No	No	No	No	Negative	NA
FI04337	IFANADIANA	FASINTSARA	IFD_SS	Sentinel	26	Male	Yes	Primary	Yes	Yes	No	No	Yes	Yes	No	Yes	Yes	No	No	No	Yes	Negative	NA
FI04338	IFANADIANA	FASINTSARA	IFD_SS	Sentinel	35	NA	Yes	Primary	No	No	No	NA	NA	No	No	No	No	No	No	No	No	Negative	NA
FI04339	IFANADIANA	FASINTSARA	IFD_SS	Sentinel	11	Female	Yes	Primary	Yes	Yes	Yes	Yes	Yes	No	No	No	No	No	No	No	No	Negative	NA
FI04340	IFANADIANA	FASINTSARA	IFD_SS	Sentinel	18	Female	Yes	Primary	Yes	Yes	Yes	Yes	Yes	No	No	No	No	No	No	No	No	Negative	NA
FI04341	IFANADIANA	FASINTSARA	IFD_SS	Sentinel	18	Female	Yes	Primary	Yes	Yes	Yes	Yes	Yes	No	No	No	No	No	No	No	No	Negative	NA
FI04342	IFANADIANA	FASINTSARA	IFD_SS	Sentinel	28	Female	Yes	Primary	Yes	Yes	Yes	Yes	Yes	No	No	No	No	No	No	No	No	Negative	NA
FI04343	IFANADIANA	FASINTSARA	IFD_SS	Sentinel	10	Male	Yes	Primary	Yes	Yes	Yes	Yes	Yes	No	No	No	No	No	No	No	No	Negative	NA
FI04344	IFANADIANA	FASINTSARA	IFD_SS	Sentinel	12	Male	Yes	Primary	Yes	Yes	Yes	Yes	Yes	No	No	No	No	No	No	No	No	Negative	NA
FI04345	IFANADIANA	FASINTSARA	IFD_SS	Sentinel	15	Male	Yes	Primary	Yes	Yes	NA	Yes	Yes	No	No	No	No	No	No	No	No	Negative	NA
FI04346	IFANADIANA	FASINTSARA	IFD_SS	Sentinel	13	Male	Yes	Primary	Yes	Yes	Yes	Yes	Yes	No	No	No	No	No	No	No	No	Negative	NA
FI04347	IFANADIANA	FASINTSARA	IFD_SS	Sentinel	16	Male	Yes	Secondary or higher	No	No	No	NA	NA	No	No	No	No	No	No	No	No	Negative	NA
FI04348	IFANADIANA	FASINTSARA	IFD_SS	Sentinel	18	Female	Yes	Secondary or higher	Yes	Yes	Yes	Yes	Yes	No	No	No	No	No	No	No	No	Negative	NA
FI04349	IFANADIANA	FASINTSARA	IFD_SS	Sentinel	11	Female	Yes	Primary	Yes	Yes	Yes	Yes	Yes	No	No	No	No	No	No	No	No	Negative	NA
FI04350	IFANADIANA	FASINTSARA	IFD_SS	Sentinel	15	Male	Yes	Secondary or higher	Yes	Yes	No	Yes	Yes	No	No	No	No	No	No	No	No	Negative	NA
FI04351	IFANADIANA	FASINTSARA	IFD_SS	Sentinel	13	Male	Yes	Primary	Yes	Yes	Yes	No	Yes	No	No	No	No	No	No	No	No	Negative	NA
FI04352	IFANADIANA	FASINTSARA	IFD_SS	Sentinel	14	Male	Yes	Primary	Yes	Yes	No	Yes	Yes	No	No	No	No	No	No	No	No	Negative	NA
FI04353	IFANADIANA	FASINTSARA	IFD_SS	Sentinel	22	Male	Yes	Primary	Yes	No	No	No	No	Yes	No	Yes	Yes	No	No	No	No	Negative	NA
FI04354	IFANADIANA	FASINTSARA	IFD_SS	Sentinel	18	Male	Yes	Secondary or higher	Yes	Yes	Yes	Yes	Yes	No	No	No	No	No	No	No	No	Negative	NA
FI04355	IFANADIANA	FASINTSARA	IFD_SS	Sentinel	28	Female	Yes	Primary	No	No	No	NA	NA	No	No	No	No	No	No	No	No	Negative	NA
FI04356	IFANADIANA	FASINTSARA	IFD_SS	Sentinel	34	Male	Yes	Primary	Yes	Yes	Yes	Yes	Yes	Yes	No	Yes	No	No	No	No	No	Negative	NA
FI04357	IFANADIANA	FASINTSARA	IFD_SS	Sentinel	14	Male	Yes	Secondary or higher	Yes	Yes	Yes	Yes	Yes	No	No	No	No	No	No	No	No	Negative	NA
FI04358	IFANADIANA	FASINTSARA	IFD_SS	Sentinel	8	Male	Yes	Primary	Yes	Yes	Yes	Yes	Yes	No	No	No	No	No	No	No	No	Negative	NA
FI04359	IFANADIANA	FASINTSARA	IFD_SS	Sentinel	31	Female	Yes	Primary	Yes	Yes	Yes	Yes	Yes	Yes	No	Yes	No	No	No	No	Yes	Negative	NA
FI04360	IFANADIANA	FASINTSARA	IFD_SS	Sentinel	10	Male	Yes	Primary	Yes	Yes	Yes	Yes	Yes	No	No	No	No	No	No	No	No	Negative	NA
FI04361	IFANADIANA	FASINTSARA	IFD_SS	Sentinel	26	Male	Yes	Primary	Yes	Yes	Yes	Yes	Yes	Yes	No	Yes	No	No	No	No	Yes	Negative	NA
FI04362	IFANADIANA	FASINTSARA	IFD_SS	Sentinel	15	Male	Yes	Secondary or higher	Yes	Yes	Yes	Yes	Yes	No	No	No	No	No	No	No	No	Negative	NA
FI04363	IFANADIANA	FASINTSARA	IFD_SS	Sentinel	30	Female	NA	NA	Yes	Yes	Yes	Yes	Yes	No	No	No	No	No	No	No	No	Negative	NA
FI04364	IFANADIANA	FASINTSARA	IFD_SS	Sentinel	16	Male	Yes	Secondary or higher	Yes	Yes	Yes	Yes	Yes	No	No	No	No	No	No	No	No	Negative	NA
FI04365	IFANADIANA	FASINTSARA	IFD_SS	Sentinel	15	Male	Yes	Primary	No	No	No	NA	NA	No	No	No	No	No	No	No	No	Negative	NA
FI04366	IFANADIANA	FASINTSARA	IFD_SS	Sentinel	10	Female	Yes	Primary	No	No	No	NA	NA	No	No	No	No	No	No	No	No	Negative	NA
FI04367	IFANADIANA	FASINTSARA	IFD_SS	Sentinel	19	Male	Yes	Secondary or higher	Yes	Yes	Yes	Yes	Yes	Yes	No	Yes	No	No	No	No	Yes	Negative	NA
FI04368	IFANADIANA	FASINTSARA	IFD_SS	Sentinel	14	Female	Yes	Secondary or higher	Yes	Yes	Yes	Yes	Yes	No	No	No	No	No	No	No	No	Negative	NA
FI04369	IFANADIANA	FASINTSARA	IFD_SS	Sentinel	17	Male	Yes	Primary	Yes	Yes	No	Yes	Yes	No	No	No	No	No	No	No	No	Negative	NA
FI04370	IFANADIANA	FASINTSARA	IFD_SS	Sentinel	6	Female	Yes	Primary	Yes	Yes	Yes	No	No	No	No	No	No	No	No	No	No	Negative	NA
FI04371	IFANADIANA	FASINTSARA	IFD_SS	Sentinel	35	Male	Yes	Primary	Yes	Yes	Yes	Yes	Yes	Yes	Yes	Yes	No	No	No	No	No	Negative	NA
FI04372	IFANADIANA	FASINTSARA	IFD_SS	Sentinel	17	Male	Yes	Secondary or higher	No	No	No	NA	NA	Yes	No	Yes	Yes	No	No	No	No	Negative	NA
FI04373	IFANADIANA	FASINTSARA	IFD_SS	Sentinel	17	Female	Yes	Secondary or higher	Yes	Yes	Yes	Yes	Yes	No	No	No	No	No	No	No	No	Negative	NA
FI04374	IFANADIANA	FASINTSARA	IFD_SS	Sentinel	9	Female	Yes	Primary	Yes	Yes	Yes	Yes	Yes	No	No	No	No	No	No	No	No	Negative	NA
FI04375	IFANADIANA	FASINTSARA	IFD_SS	Sentinel	13	Male	Yes	Secondary or higher	Yes	Yes	Yes	No	No	No	No	No	No	No	No	No	No	Negative	NA
FI04376	IFANADIANA	FASINTSARA	IFD_SS	Sentinel	20	NA	Yes	Primary	Yes	Yes	Yes	Yes	Yes	No	No	No	No	No	No	No	No	Negative	NA
FI04377	IFANADIANA	FASINTSARA	IFD_SS	Sentinel	30	Female	No	No education	Yes	Yes	NA	Yes	Yes	No	No	No	No	No	No	No	No	Negative	NA
FI04378	IFANADIANA	FASINTSARA	IFD_SS	Sentinel	36	Female	Yes	Secondary or higher	Yes	Yes	Yes	Yes	Yes	Yes	No	Yes	No	No	No	No	Yes	Negative	NA
FI04379	IFANADIANA	FASINTSARA	IFD_SS	Sentinel	15	Male	Yes	Secondary or higher	Yes	Yes	No	Yes	Yes	No	No	No	No	No	No	No	No	Negative	NA
FI04380	IFANADIANA	FASINTSARA	IFD_SS	Sentinel	10	Male	Yes	Primary	Yes	Yes	Yes	No	No	No	No	No	No	No	No	No	No	Negative	NA
FI04381	IFANADIANA	FASINTSARA	IFD_SS	Sentinel	10	Male	Yes	Primary	No	No	No	NA	NA	No	No	No	No	No	No	No	No	Negative	NA
FI04382	IFANADIANA	FASINTSARA	IFD_SS	Sentinel	25	NA	Yes	Primary	Yes	Yes	Yes	Yes	Yes	No	No	No	No	No	No	No	No	Negative	NA
FI04383	IFANADIANA	FASINTSARA	IFD_SS	Sentinel	28	Male	Yes	Primary	Yes	No	No	Yes	Yes	Yes	No	Yes	Yes	No	No	No	Yes	Negative	NA
FI04384	IFANADIANA	FASINTSARA	IFD_SS	Sentinel	14	Female	Yes	Secondary or higher	Yes	Yes	Yes	Yes	Yes	No	No	No	No	No	No	No	No	Negative	NA
FI04385	IFANADIANA	FASINTSARA	IFD_SS	Sentinel	12	Female	Yes	Secondary or higher	Yes	Yes	Yes	Yes	Yes	No	No	No	No	No	No	No	No	Negative	NA
FI04386	IFANADIANA	FASINTSARA	IFD_SS	Sentinel	5	Female	Yes	Primary	Yes	Yes	Yes	No	No	No	No	No	No	No	No	No	No	Negative	NA
FI04387	IFANADIANA	FASINTSARA	IFD_SS	Sentinel	23	Female	Yes	Primary	Yes	Yes	Yes	Yes	Yes	No	No	No	No	No	No	No	No	Negative	NA
FI04388	IFANADIANA	FASINTSARA	IFD_SS	Sentinel	10	Male	Yes	Primary	No	No	No	NA	NA	No	No	No	No	No	No	No	No	Negative	NA
FI04389	IFANADIANA	FASINTSARA	IFD_SS	Sentinel	18	Female	Yes	Primary	Yes	Yes	Yes	Yes	Yes	Yes	No	Yes	No	No	No	No	Yes	Negative	NA
FI04390	IFANADIANA	FASINTSARA	IFD_SS	Sentinel	16	Male	Yes	Secondary or higher	Yes	Yes	Yes	Yes	Yes	No	No	No	No	No	No	No	No	Negative	NA
FI04391	IFANADIANA	FASINTSARA	IFD_SS	Sentinel	17	Male	Yes	Secondary or higher	Yes	Yes	No	Yes	Yes	Yes	Yes	Yes	No	No	No	No	Yes	Negative	NA
FI04392	IFANADIANA	FASINTSARA	IFD_SS	Sentinel	13	Female	Yes	Primary	Yes	Yes	Yes	Yes	Yes	No	No	No	No	No	No	No	No	Negative	NA
FI04393	IFANADIANA	FASINTSARA	IFD_SS	Sentinel	17	Female	Yes	Primary	Yes	Yes	Yes	Yes	Yes	No	No	No	No	No	No	No	No	Negative	NA
FI04394	IFANADIANA	FASINTSARA	IFD_SS	Sentinel	19	Female	Yes	Primary	Yes	Yes	No	Yes	Yes	No	No	No	No	No	No	No	No	Negative	NA
FI04395	IFANADIANA	FASINTSARA	IFD_SS	Sentinel	21	Female	Yes	Primary	Yes	Yes	Yes	Yes	Yes	No	No	No	No	No	No	No	No	Negative	NA
FI04396	IFANADIANA	FASINTSARA	IFD_SS	Sentinel	18	Female	Yes	Primary	Yes	Yes	Yes	Yes	Yes	No	No	No	No	No	No	No	No	Negative	NA
FI04397	IFANADIANA	FASINTSARA	IFD_SS	Sentinel	NA	Male	Yes	Primary	Yes	Yes	Yes	Yes	Yes	No	No	No	No	No	No	No	No	Negative	NA
FI04398	IFANADIANA	FASINTSARA	IFD_SS	Sentinel	33	Female	No	No education	No	No	No	NA	NA	No	No	No	No	No	No	No	No	Negative	NA
FI04399	IFANADIANA	FASINTSARA	IFD_SS	Sentinel	10	Male	Yes	Primary	Yes	Yes	No	Yes	Yes	No	No	No	No	No	No	No	No	Negative	NA
FI04400	IFANADIANA	FASINTSARA	IFD_SS	Sentinel	18	Male	Yes	Primary	Yes	Yes	No	Yes	Yes	No	No	No	No	No	No	No	No	Negative	NA
FI04401	IFANADIANA	FASINTSARA	IFD_SS	Sentinel	19	Female	Yes	Primary	Yes	Yes	Yes	Yes	Yes	No	No	No	No	No	No	No	No	Negative	NA
FI04402	IFANADIANA	FASINTSARA	IFD_SS	Sentinel	14	Male	Yes	Primary	Yes	Yes	Yes	Yes	Yes	No	No	No	No	No	No	No	No	Negative	NA
FI04403	IFANADIANA	FASINTSARA	IFD_SS	Sentinel	10	Female	Yes	Primary	Yes	Yes	Yes	Yes	Yes	No	No	No	No	No	No	No	No	Negative	NA
FI04404	IFANADIANA	FASINTSARA	IFD_SS	Sentinel	30	Female	Yes	Primary	Yes	Yes	Yes	Yes	Yes	No	No	No	No	No	No	No	No	Negative	NA
FI04405	IFANADIANA	FASINTSARA	IFD_SS	Sentinel	13	Female	Yes	Primary	Yes	Yes	Yes	Yes	Yes	No	No	No	No	No	No	No	No	Negative	NA
FI04406	IFANADIANA	FASINTSARA	IFD_SS	Sentinel	18	Female	Yes	Primary	Yes	Yes	Yes	Yes	Yes	No	No	No	No	No	No	No	No	Negative	NA
FI04407	IFANADIANA	FASINTSARA	IFD_SS	Sentinel	18	Female	Yes	Secondary or higher	Yes	Yes	Yes	Yes	NA	No	No	No	No	No	No	No	No	Negative	NA
FI04408	IFANADIANA	FASINTSARA	IFD_SS	Sentinel	18	Female	Yes	Primary	Yes	Yes	Yes	Yes	Yes	No	No	No	No	No	No	No	No	Negative	NA
FI04409	IFANADIANA	FASINTSARA	IFD_SS	Sentinel	18	Female	Yes	Primary	Yes	Yes	Yes	Yes	Yes	No	No	No	No	No	No	No	No	Negative	NA
FI04410	IFANADIANA	FASINTSARA	IFD_SS	Sentinel	19	Female	Yes	Primary	Yes	Yes	Yes	Yes	Yes	No	No	No	No	No	No	No	No	Negative	NA
FI04411	IFANADIANA	FASINTSARA	IFD_SS	Sentinel	35	Male	Yes	Secondary or higher	Yes	Yes	Yes	Yes	Yes	Yes	Yes	Yes	Yes	No	No	No	Yes	Negative	NA
FI04412	IFANADIANA	FASINTSARA	IFD_SS	Sentinel	30	Female	Yes	Secondary or higher	Yes	Yes	Yes	Yes	Yes	Yes	Yes	Yes	Yes	No	No	No	Yes	Negative	NA
FI04413	IFANADIANA	FASINTSARA	IFD_SS	Sentinel	30	Female	No	No education	Yes	Yes	Yes	Yes	Yes	Yes	No	Yes	No	No	No	No	Yes	Negative	NA
FI04414	IFANADIANA	FASINTSARA	IFD_SS	Sentinel	19	Female	Yes	Secondary or higher	Yes	No	No	No	No	No	No	No	No	No	No	No	No	Negative	NA
FI04415	IFANADIANA	FASINTSARA	IFD_SS	Sentinel	27	Male	Yes	Primary	Yes	Yes	No	Yes	Yes	No	No	No	No	No	No	No	No	Negative	NA
FI04416	IFANADIANA	FASINTSARA	IFD_SS	Sentinel	44	Female	Yes	Primary	Yes	Yes	Yes	Yes	Yes	Yes	No	Yes	No	No	No	No	Yes	Negative	NA
FI04417	IFANADIANA	FASINTSARA	IFD_SS	Sentinel	8	Female	Yes	Primary	Yes	Yes	Yes	No	Yes	No	No	No	No	No	No	No	No	Negative	NA
FI04418	IFANADIANA	FASINTSARA	IFD_SS	Sentinel	11	Male	Yes	Primary	Yes	Yes	Yes	Yes	Yes	No	No	No	No	No	No	No	No	Negative	NA
FI04419	IFANADIANA	FASINTSARA	IFD_SS	Sentinel	9	Male	Yes	Primary	Yes	Yes	Yes	Yes	Yes	No	No	No	No	No	No	No	No	Negative	NA
FI04420	IFANADIANA	FASINTSARA	IFD_SS	Sentinel	62	Male	Yes	Primary	Yes	No	No	Yes	Yes	Yes	No	Yes	Yes	No	No	No	Yes	Negative	NA
FI04421	IFANADIANA	FASINTSARA	IFD_SS	Sentinel	11	Female	Yes	Primary	Yes	Yes	No	Yes	Yes	No	No	No	No	No	No	No	No	Negative	NA
FI04422	IFANADIANA	FASINTSARA	IFD_SS	Sentinel	12	Male	Yes	Primary	Yes	Yes	Yes	Yes	Yes	No	No	No	No	No	No	No	No	Negative	NA
FI04423	IFANADIANA	FASINTSARA	IFD_SS	Sentinel	8	Female	Yes	Primary	Yes	Yes	No	Yes	Yes	No	No	No	No	No	No	No	No	Negative	NA
FI04424	IFANADIANA	FASINTSARA	IFD_SS	Sentinel	13	Male	Yes	Primary	Yes	Yes	No	Yes	Yes	No	No	No	No	No	No	No	No	Negative	NA
FI04425	IFANADIANA	FASINTSARA	IFD_SS	Sentinel	15	Male	Yes	Primary	Yes	Yes	No	Yes	Yes	No	No	No	No	No	No	No	No	Negative	NA
FI04426	IFANADIANA	FASINTSARA	IFD_SS	Sentinel	11	Female	Yes	Primary	Yes	Yes	Yes	Yes	Yes	No	No	No	No	No	No	No	No	Negative	NA
FI04427	IFANADIANA	FASINTSARA	IFD_SS	Sentinel	19	Male	Yes	Secondary or higher	Yes	Yes	No	Yes	Yes	No	No	No	No	No	No	No	No	Negative	NA
FI04428	IFANADIANA	FASINTSARA	IFD_SS	Sentinel	9	Female	Yes	Primary	Yes	Yes	Yes	Yes	Yes	No	No	No	No	No	No	No	No	Negative	NA
FI04429	IFANADIANA	FASINTSARA	IFD_SS	Sentinel	8	Male	Yes	Primary	Yes	Yes	Yes	Yes	Yes	No	No	No	No	No	No	No	No	Negative	NA
FI04430	IFANADIANA	FASINTSARA	IFD_SS	Sentinel	8	Male	Yes	Primary	Yes	Yes	No	Yes	Yes	Yes	No	No	Yes	No	No	No	Yes	Negative	NA
FI04431	IFANADIANA	FASINTSARA	IFD_SS	Sentinel	11	Male	Yes	Primary	Yes	Yes	Yes	Yes	Yes	No	No	No	No	No	No	No	No	Negative	NA
FI04432	IFANADIANA	FASINTSARA	IFD_SS	Sentinel	10	Male	Yes	Primary	Yes	Yes	Yes	Yes	Yes	No	No	No	No	No	No	No	No	Negative	NA
FI04433	IFANADIANA	FASINTSARA	IFD_SS	Sentinel	37	Female	Yes	Primary	Yes	Yes	Yes	Yes	Yes	Yes	No	Yes	Yes	No	No	No	Yes	Negative	NA
FI04434	IFANADIANA	FASINTSARA	IFD_SS	Sentinel	17	Male	Yes	Secondary or higher	Yes	Yes	Yes	Yes	Yes	No	No	No	No	No	No	No	No	Negative	NA
FI04435	IFANADIANA	FASINTSARA	IFD_SS	Sentinel	23	Male	Yes	Secondary or higher	Yes	Yes	No	Yes	Yes	Yes	No	Yes	Yes	No	No	No	No	Negative	NA
FI04436	IFANADIANA	FASINTSARA	IFD_SS	Sentinel	30	Female	No	No education	Yes	No	No	Yes	Yes	No	No	No	No	No	No	No	No	Negative	NA
FI04437	IFANADIANA	FASINTSARA	IFD_SS	Sentinel	40	Male	Yes	Primary	Yes	Yes	Yes	Yes	No	Yes	Yes	Yes	Yes	No	No	No	Yes	Negative	NA
FI04438	IFANADIANA	FASINTSARA	IFD_SS	Sentinel	17	Male	Yes	Secondary or higher	Yes	Yes	Yes	Yes	Yes	No	No	No	No	No	No	No	No	Negative	NA
FI04439	IFANADIANA	FASINTSARA	IFD_SS	Sentinel	20	Male	Yes	Secondary or higher	Yes	No	NA	Yes	Yes	No	No	No	No	No	No	No	No	Negative	NA
FI04440	IFANADIANA	FASINTSARA	IFD_SS	Sentinel	12	Female	Yes	Primary	Yes	Yes	Yes	Yes	Yes	No	No	No	No	No	No	No	No	Negative	NA
FI04441	IFANADIANA	FASINTSARA	IFD_SS	Sentinel	51	Male	Yes	Secondary or higher	Yes	Yes	Yes	Yes	Yes	Yes	Yes	Yes	No	No	No	No	Yes	Negative	NA
FI04442	IFANADIANA	FASINTSARA	IFD_SS	Sentinel	54	Male	Yes	Secondary or higher	Yes	Yes	No	No	No	No	No	No	No	No	No	No	No	Negative	NA
FI04443	IFANADIANA	FASINTSARA	IFD_SS	Sentinel	36	Male	Yes	Primary	Yes	Yes	Yes	Yes	Yes	Yes	No	Yes	Yes	No	No	No	Yes	Negative	NA
FI04444	IFANADIANA	FASINTSARA	IFD_SS	Sentinel	65	Female	Yes	Primary	Yes	No	No	Yes	Yes	No	No	No	No	No	No	No	No	Negative	NA
FI04445	IFANADIANA	FASINTSARA	IFD_SS	Sentinel	8	Male	Yes	Primary	Yes	Yes	Yes	Yes	Yes	No	No	No	No	No	No	No	No	Negative	NA
FI04446	IFANADIANA	FASINTSARA	IFD_SS	Sentinel	28	Female	No	No education	Yes	Yes	Yes	Yes	Yes	Yes	No	Yes	Yes	No	No	No	Yes	Negative	NA
FI04447	IFANADIANA	FASINTSARA	IFD_SS	Sentinel	15	Male	Yes	Primary	Yes	No	No	Yes	Yes	No	No	No	No	No	No	No	No	Negative	NA
FI04448	IFANADIANA	FASINTSARA	IFD_SS	Sentinel	22	Female	Yes	Primary	Yes	Yes	Yes	Yes	Yes	No	No	No	No	No	No	No	No	Negative	NA
FI04449	IFANADIANA	FASINTSARA	IFD_SS	Sentinel	6	Female	Yes	Primary	Yes	Yes	No	Yes	Yes	No	No	No	No	No	No	No	No	Negative	NA
FI04450	IFANADIANA	FASINTSARA	IFD_SS	Sentinel	11	Female	Yes	Primary	Yes	Yes	No	NA	NA	No	No	No	No	No	No	No	No	Negative	NA
FI04451	IFANADIANA	FASINTSARA	IFD_SS	Sentinel	11	Female	Yes	Primary	Yes	Yes	No	Yes	Yes	No	No	No	No	No	No	No	No	Negative	NA
FI04452	IFANADIANA	FASINTSARA	IFD_SS	Sentinel	50	Female	No	No education	Yes	Yes	No	Yes	Yes	No	No	No	No	No	No	No	No	Negative	NA
FI04453	IFANADIANA	FASINTSARA	IFD_SS	Sentinel	12	Female	Yes	Primary	Yes	Yes	Yes	Yes	Yes	No	No	No	No	No	No	No	No	Negative	NA
FI04454	IFANADIANA	FASINTSARA	IFD_SS	Sentinel	13	Male	Yes	Primary	Yes	Yes	Yes	Yes	Yes	No	No	No	No	No	No	No	No	Negative	NA
FI04455	IFANADIANA	FASINTSARA	IFD_SS	Sentinel	8	Female	Yes	Primary	Yes	Yes	Yes	Yes	Yes	No	No	No	No	No	No	No	No	Negative	NA
FI04456	IFANADIANA	FASINTSARA	IFD_SS	Sentinel	11	Male	Yes	Primary	Yes	Yes	No	Yes	Yes	No	No	No	No	No	No	No	No	Negative	NA
FI04457	IFANADIANA	FASINTSARA	IFD_SS	Sentinel	12	Female	Yes	Secondary or higher	Yes	Yes	Yes	Yes	Yes	No	No	No	No	No	No	No	No	Negative	NA
FI04458	IFANADIANA	FASINTSARA	IFD_SS	Sentinel	13	Female	Yes	Primary	Yes	Yes	Yes	Yes	Yes	No	No	No	No	No	No	No	No	Negative	NA
FI04459	IFANADIANA	FASINTSARA	IFD_SS	Sentinel	13	Female	Yes	Primary	Yes	Yes	Yes	Yes	Yes	No	No	No	No	No	No	No	No	Negative	NA
FI04460	IFANADIANA	FASINTSARA	IFD_SS	Sentinel	13	Male	Yes	Primary	Yes	Yes	Yes	Yes	Yes	No	No	No	No	No	No	No	No	Negative	NA
FI04461	IFANADIANA	FASINTSARA	IFD_SS	Sentinel	18	Female	Yes	Primary	Yes	Yes	Yes	Yes	Yes	No	No	No	No	No	No	No	No	Negative	NA
FI04462	IFANADIANA	FASINTSARA	IFD_SS	Sentinel	8	Male	Yes	Primary	Yes	Yes	Yes	Yes	Yes	No	No	No	No	No	No	No	No	Negative	NA
FI04463	IFANADIANA	FASINTSARA	IFD_SS	Sentinel	60	Female	No	No education	Yes	Yes	Yes	No	No	No	No	No	No	No	No	No	No	Negative	NA
FI04464	IFANADIANA	FASINTSARA	IFD_SS	Sentinel	18	Female	Yes	Primary	Yes	Yes	Yes	Yes	Yes	No	No	No	No	No	No	No	No	Positive	Negative
FI04465	IFANADIANA	FASINTSARA	IFD_SS	Sentinel	55	Female	Yes	Primary	Yes	Yes	Yes	Yes	Yes	Yes	Yes	Yes	No	No	No	No	Yes	Negative	NA
FI04466	IFANADIANA	FASINTSARA	IFD_SS	Sentinel	12	Male	Yes	Primary	Yes	Yes	No	No	No	No	No	No	No	No	No	No	No	Negative	NA
FI04467	IFANADIANA	FASINTSARA	IFD_SS	Sentinel	40	Female	Yes	Secondary or higher	Yes	Yes	Yes	Yes	Yes	Yes	No	Yes	No	No	No	No	Yes	Negative	NA
FI04468	IFANADIANA	FASINTSARA	IFD_SS	Sentinel	22	Female	Yes	Primary	Yes	Yes	Yes	Yes	Yes	No	No	No	No	No	No	No	No	Negative	NA
FI04469	IFANADIANA	FASINTSARA	IFD_SS	Sentinel	13	Male	Yes	Primary	Yes	No	No	Yes	Yes	No	No	No	No	No	No	No	No	Negative	NA
FI04470	IFANADIANA	FASINTSARA	IFD_SS	Sentinel	18	Female	Yes	Secondary or higher	Yes	Yes	Yes	Yes	Yes	No	No	No	No	No	No	No	No	Negative	NA
FI04471	IFANADIANA	FASINTSARA	IFD_SS	Sentinel	47	Female	Yes	Secondary or higher	Yes	Yes	Yes	Yes	Yes	Yes	No	Yes	Yes	No	No	No	Yes	Negative	NA
FI04472	IFANADIANA	FASINTSARA	IFD_SS	Sentinel	53	Female	Yes	Primary	Yes	Yes	Yes	Yes	Yes	Yes	No	Yes	Yes	No	No	No	Yes	Negative	NA
FI04473	IFANADIANA	FASINTSARA	IFD_SS	Sentinel	18	Female	Yes	Secondary or higher	Yes	Yes	No	No	No	No	No	No	No	No	No	No	No	Negative	NA
FI04474	IFANADIANA	FASINTSARA	IFD_SS	Sentinel	28	Female	Yes	Primary	Yes	Yes	No	No	No	No	No	No	No	No	No	No	No	Negative	NA
FI04475	IFANADIANA	FASINTSARA	IFD_SS	Sentinel	5	Female	Yes	Primary	Yes	Yes	Yes	Yes	Yes	No	No	No	No	No	No	No	No	Negative	NA
FI04476	IFANADIANA	FASINTSARA	IFD_SS	Sentinel	30	Female	No	No education	Yes	Yes	No	Yes	Yes	No	No	No	No	No	No	No	No	Positive	Negative
FI04477	IFANADIANA	FASINTSARA	IFD_SS	Sentinel	28	Female	No	No education	Yes	Yes	Yes	Yes	Yes	No	No	No	No	No	No	No	No	Negative	NA
FI04478	IFANADIANA	FASINTSARA	IFD_SS	Sentinel	5	Male	Yes	Primary	Yes	Yes	Yes	NA	NA	No	No	No	No	No	No	No	No	Negative	NA
FI04479	IFANADIANA	FASINTSARA	IFD_SS	Sentinel	8	Female	Yes	Primary	Yes	Yes	No	Yes	Yes	No	No	No	No	No	No	No	No	Negative	NA
FI04480	IFANADIANA	FASINTSARA	IFD_SS	Sentinel	14	Male	Yes	Secondary or higher	Yes	Yes	Yes	Yes	Yes	No	No	No	No	No	No	No	No	Negative	NA
FI04481	IFANADIANA	FASINTSARA	IFD_SS	Sentinel	13	Male	Yes	Secondary or higher	Yes	Yes	No	Yes	Yes	No	No	No	No	No	No	No	No	Negative	NA
FI04482	IFANADIANA	FASINTSARA	IFD_SS	Sentinel	20	Male	Yes	Primary	Yes	Yes	No	No	No	No	No	No	No	No	No	No	No	Negative	NA
FI04483	IFANADIANA	FASINTSARA	IFD_SS	Sentinel	18	Female	Yes	Secondary or higher	Yes	Yes	No	Yes	Yes	No	No	No	No	No	No	No	No	Negative	NA
FI04484	IFANADIANA	FASINTSARA	IFD_SS	Sentinel	9	Female	Yes	Primary	Yes	Yes	Yes	Yes	Yes	No	No	No	No	No	No	No	No	Negative	NA
FI04485	IFANADIANA	FASINTSARA	IFD_SS	Sentinel	15	Male	Yes	Secondary or higher	Yes	Yes	Yes	Yes	Yes	No	No	No	No	No	No	No	No	Negative	NA
FI04486	IFANADIANA	FASINTSARA	IFD_SS	Sentinel	15	Male	Yes	Secondary or higher	Yes	No	Yes	Yes	Yes	No	No	No	No	No	No	No	No	Negative	NA
FI04487	IFANADIANA	FASINTSARA	IFD_SS	Sentinel	8	Male	Yes	Primary	Yes	Yes	No	Yes	Yes	No	No	No	No	No	No	No	No	Negative	NA
FI04488	IFANADIANA	FASINTSARA	IFD_SS	Sentinel	31	Female	Yes	Secondary or higher	Yes	No	No	Yes	No	No	No	No	No	No	No	No	No	Negative	NA
FI04489	IFANADIANA	FASINTSARA	IFD_SS	Sentinel	64	Female	Yes	Primary	Yes	Yes	Yes	Yes	Yes	No	No	No	No	No	No	No	No	Negative	NA
FI04490	IFANADIANA	FASINTSARA	IFD_SS	Sentinel	49	Female	Yes	Primary	Yes	Yes	Yes	No	No	Yes	No	No	Yes	No	No	No	No	Negative	NA
FI04491	IFANADIANA	FASINTSARA	IFD_SS	Sentinel	18	Female	Yes	Secondary or higher	Yes	Yes	Yes	Yes	Yes	No	No	No	No	No	No	No	No	Negative	NA
FI04492	IFANADIANA	FASINTSARA	IFD_SS	Sentinel	31	Female	Yes	Primary	Yes	Yes	Yes	Yes	Yes	Yes	No	Yes	No	No	No	No	Yes	Negative	NA
FI04493	IFANADIANA	FASINTSARA	IFD_SS	Sentinel	16	Male	Yes	Primary	Yes	Yes	Yes	No	No	No	No	No	No	No	No	No	No	Negative	NA
FI04494	IFANADIANA	FASINTSARA	IFD_SS	Sentinel	10	Male	Yes	Primary	Yes	Yes	Yes	No	No	No	No	No	No	No	No	No	No	Negative	NA
FI04495	IFANADIANA	FASINTSARA	IFD_SS	Sentinel	53	Female	Yes	Primary	Yes	Yes	Yes	No	No	Yes	No	No	Yes	No	No	No	No	Negative	NA
FI04496	IFANADIANA	FASINTSARA	IFD_SS	Sentinel	18	Male	Yes	Primary	Yes	Yes	Yes	Yes	Yes	No	No	No	No	No	No	No	No	Negative	NA
FI04497	IFANADIANA	FASINTSARA	IFD_SS	Sentinel	43	Male	Yes	Primary	Yes	Yes	Yes	Yes	Yes	Yes	No	Yes	No	No	No	No	Yes	Negative	NA
FI04498	IFANADIANA	FASINTSARA	IFD_SS	Sentinel	40	Female	No	No education	Yes	Yes	Yes	Yes	Yes	No	No	No	No	No	No	No	No	Negative	NA
FI04499	IFANADIANA	FASINTSARA	IFD_SS	Sentinel	13	Female	Yes	Primary	Yes	Yes	Yes	Yes	Yes	No	No	No	No	No	No	No	No	Negative	NA
FI04500	IFANADIANA	FASINTSARA	IFD_SS	Sentinel	6	Female	Yes	Primary	Yes	Yes	Yes	No	No	No	No	No	No	No	No	No	No	Negative	NA
FI04501	IFANADIANA	FASINTSARA	IFD_SS	Sentinel	40	Female	Yes	Primary	Yes	Yes	Yes	No	No	No	No	No	No	No	No	No	No	Negative	NA
FI04502	IFANADIANA	FASINTSARA	IFD_SS	Sentinel	28	Female	Yes	Primary	Yes	Yes	Yes	Yes	Yes	No	No	No	No	No	No	No	No	Negative	NA
FI04503	IFANADIANA	FASINTSARA	IFD_SS	Sentinel	33	Male	NA	NA	Yes	Yes	Yes	No	No	No	No	No	No	No	No	No	No	Negative	NA
FI04504	IFANADIANA	FASINTSARA	IFD_SS	Sentinel	28	Male	Yes	Primary	Yes	Yes	No	Yes	No	No	No	No	No	No	No	No	No	Negative	NA
FI04505	IFANADIANA	FASINTSARA	IFD_SS	Sentinel	30	Male	Yes	Primary	Yes	Yes	Yes	Yes	Yes	Yes	No	No	Yes	No	No	No	Yes	Negative	NA
FI04506	IFANADIANA	FASINTSARA	IFD_SS	Sentinel	27	Male	Yes	Primary	Yes	Yes	Yes	Yes	Yes	No	No	No	No	No	No	No	No	Negative	NA
FI04507	IFANADIANA	FASINTSARA	IFD_SS	Sentinel	35	Male	No	No education	Yes	Yes	Yes	Yes	Yes	Yes	No	No	Yes	No	No	No	Yes	Negative	NA
FI04508	IFANADIANA	FASINTSARA	IFD_SS	Sentinel	29	Male	Yes	Primary	Yes	Yes	Yes	Yes	Yes	No	No	No	No	No	No	No	No	Negative	NA
FI04509	IFANADIANA	FASINTSARA	IFD_SS	Sentinel	8	Female	Yes	Primary	Yes	Yes	Yes	Yes	Yes	No	No	No	No	No	No	No	No	Negative	NA
FI04510	IFANADIANA	FASINTSARA	IFD_SS	Sentinel	28	Female	No	No education	Yes	Yes	Yes	Yes	Yes	Yes	No	No	Yes	No	No	No	No	Negative	NA
FI04511	IFANADIANA	FASINTSARA	IFD_SS	Sentinel	18	Female	Yes	Primary	Yes	Yes	Yes	Yes	Yes	Yes	No	No	Yes	No	No	No	No	Negative	NA
FI04512	IFANADIANA	FASINTSARA	IFD_SS	Sentinel	8	Female	Yes	Primary	Yes	Yes	Yes	No	Yes	No	No	No	No	No	No	No	No	Negative	NA
FI04513	IFANADIANA	FASINTSARA	IFD_SS	Sentinel	15	Male	Yes	Secondary or higher	Yes	Yes	Yes	Yes	NA	No	No	No	No	No	No	No	No	Negative	NA
FI04514	IFANADIANA	FASINTSARA	IFD_SS	Sentinel	33	Female	Yes	Secondary or higher	Yes	Yes	Yes	Yes	No	Yes	Yes	Yes	Yes	No	No	No	Yes	Negative	NA
FI04515	IFANADIANA	FASINTSARA	IFD_SS	Sentinel	7	Female	Yes	Primary	No	No	No	NA	NA	No	No	No	No	No	No	No	No	Negative	NA
FI04516	IFANADIANA	FASINTSARA	IFD_SS	Sentinel	6	Female	Yes	Primary	No	No	No	NA	NA	No	No	No	No	No	No	No	No	Negative	NA
FI04517	IFANADIANA	FASINTSARA	IFD_SS	Sentinel	10	Female	Yes	Primary	Yes	Yes	Yes	Yes	Yes	No	No	No	No	No	No	No	No	Negative	NA
FI04518	IFANADIANA	ANDRORANGAVOLA	IFD_SCS1	Spot-check	60	Female	Yes	Primary	Yes	Yes	Yes	Yes	No	Yes	No	Yes	Yes	No	No	No	No	Negative	NA
FI04519	IFANADIANA	ANDRORANGAVOLA	IFD_SCS1	Spot-check	49	Male	Yes	Primary	Yes	Yes	Yes	Yes	No	Yes	No	Yes	Yes	No	No	No	No	Negative	NA
FI04520	IFANADIANA	ANDRORANGAVOLA	IFD_SCS1	Spot-check	9	Male	Yes	Primary	Yes	Yes	Yes	No	No	No	No	No	No	No	No	No	No	Negative	NA
FI04521	IFANADIANA	ANDRORANGAVOLA	IFD_SCS1	Spot-check	27	Male	No	No education	Yes	Yes	No	No	No	Yes	No	Yes	No	No	No	No	No	Negative	NA
FI04522	IFANADIANA	ANDRORANGAVOLA	IFD_SCS1	Spot-check	47	Male	Yes	Primary	Yes	Yes	Yes	No	No	Yes	No	No	Yes	No	No	No	No	Negative	NA
FI04523	IFANADIANA	ANDRORANGAVOLA	IFD_SCS1	Spot-check	46	Female	Yes	Primary	Yes	Yes	Yes	Yes	Yes	Yes	No	Yes	Yes	No	No	No	Yes	Negative	NA
FI04524	IFANADIANA	ANDRORANGAVOLA	IFD_SCS1	Spot-check	67	Male	Yes	Primary	Yes	Yes	Yes	Yes	Yes	Yes	No	No	Yes	No	No	No	Yes	Negative	NA
FI04525	IFANADIANA	ANDRORANGAVOLA	IFD_SCS1	Spot-check	27	Male	Yes	Primary	Yes	Yes	No	Yes	Yes	No	No	No	No	No	No	No	No	Negative	NA
FI04526	IFANADIANA	ANDRORANGAVOLA	IFD_SCS1	Spot-check	51	Male	Yes	Primary	Yes	Yes	No	Yes	Yes	Yes	Yes	Yes	Yes	No	No	No	No	Negative	NA
FI04527	IFANADIANA	ANDRORANGAVOLA	IFD_SCS1	Spot-check	69	Female	Yes	Primary	Yes	Yes	Yes	Yes	Yes	Yes	No	No	Yes	No	No	No	Yes	Negative	NA
FI04528	IFANADIANA	ANDRORANGAVOLA	IFD_SCS1	Spot-check	26	Female	No	No education	Yes	Yes	No	Yes	Yes	No	No	No	No	No	No	No	No	Negative	NA
FI04529	IFANADIANA	ANDRORANGAVOLA	IFD_SCS1	Spot-check	45	Female	Yes	Primary	Yes	Yes	No	Yes	Yes	Yes	Yes	No	No	No	No	No	Yes	Negative	NA
FI04530	IFANADIANA	ANDRORANGAVOLA	IFD_SCS1	Spot-check	32	Female	Yes	Primary	Yes	Yes	Yes	Yes	Yes	No	No	No	No	No	No	No	No	Negative	NA
FI04531	IFANADIANA	ANDRORANGAVOLA	IFD_SCS1	Spot-check	40	Female	Yes	Secondary or higher	Yes	Yes	Yes	Yes	Yes	Yes	No	Yes	Yes	No	No	No	NA	Negative	NA
FI04532	IFANADIANA	ANDRORANGAVOLA	IFD_SCS1	Spot-check	30	Male	No	No education	Yes	Yes	Yes	Yes	Yes	No	No	No	No	No	No	No	No	Negative	NA
FI04533	IFANADIANA	ANDRORANGAVOLA	IFD_SCS1	Spot-check	18	Female	Yes	Secondary or higher	Yes	Yes	Yes	Yes	Yes	No	No	No	No	No	No	No	No	Negative	NA
FI04534	IFANADIANA	ANDRORANGAVOLA	IFD_SCS1	Spot-check	45	Male	No	No education	Yes	Yes	Yes	Yes	Yes	Yes	No	No	Yes	No	No	No	Yes	Negative	NA
FI04535	IFANADIANA	ANDRORANGAVOLA	IFD_SCS1	Spot-check	25	Female	Yes	Secondary or higher	Yes	Yes	Yes	No	No	Yes	No	No	Yes	No	No	No	Yes	Negative	NA
FI04536	IFANADIANA	ANDRORANGAVOLA	IFD_SCS1	Spot-check	28	Male	Yes	Primary	Yes	Yes	Yes	Yes	Yes	Yes	No	Yes	Yes	No	No	No	Yes	Negative	NA
FI04537	IFANADIANA	ANDRORANGAVOLA	IFD_SCS1	Spot-check	8	Female	Yes	Primary	Yes	Yes	Yes	Yes	Yes	No	No	No	No	No	No	No	No	Negative	NA
FI04538	IFANADIANA	ANDRORANGAVOLA	IFD_SCS1	Spot-check	69	Male	Yes	Primary	Yes	Yes	Yes	Yes	Yes	Yes	No	Yes	Yes	No	No	No	No	Negative	NA
FI04539	IFANADIANA	ANDRORANGAVOLA	IFD_SCS1	Spot-check	18	Female	Yes	Primary	Yes	Yes	Yes	Yes	Yes	No	No	No	No	No	No	No	No	Negative	NA
FI04540	IFANADIANA	ANDRORANGAVOLA	IFD_SCS1	Spot-check	17	Female	Yes	Primary	Yes	Yes	Yes	Yes	Yes	No	No	No	No	No	No	No	No	Negative	NA
FI04541	IFANADIANA	ANDRORANGAVOLA	IFD_SCS1	Spot-check	7	Female	Yes	Primary	Yes	Yes	Yes	Yes	Yes	No	No	No	No	No	No	No	No	Negative	NA
FI04542	IFANADIANA	ANDRORANGAVOLA	IFD_SCS1	Spot-check	17	Female	Yes	Primary	Yes	Yes	Yes	Yes	Yes	No	No	No	No	No	No	No	No	Negative	NA
FI04543	IFANADIANA	ANDRORANGAVOLA	IFD_SCS1	Spot-check	23	Female	Yes	Secondary or higher	Yes	Yes	Yes	Yes	Yes	Yes	No	Yes	Yes	No	No	No	No	Negative	NA
FI04544	IFANADIANA	ANDRORANGAVOLA	IFD_SCS1	Spot-check	22	Female	Yes	Primary	Yes	Yes	Yes	Yes	Yes	Yes	No	No	Yes	No	No	No	Yes	Negative	NA
FI04545	IFANADIANA	ANDRORANGAVOLA	IFD_SCS1	Spot-check	8	Female	Yes	Primary	Yes	Yes	Yes	Yes	Yes	No	No	No	No	No	No	No	No	Negative	NA
FI04546	IFANADIANA	ANDRORANGAVOLA	IFD_SCS1	Spot-check	27	Female	Yes	Primary	Yes	Yes	Yes	No	No	Yes	No	No	Yes	No	No	No	Yes	Negative	NA
FI04547	IFANADIANA	ANDRORANGAVOLA	IFD_SCS1	Spot-check	18	Female	Yes	Primary	Yes	Yes	Yes	Yes	Yes	No	No	No	No	No	No	No	No	Negative	NA
FI04548	IFANADIANA	ANDRORANGAVOLA	IFD_SCS1	Spot-check	19	Female	Yes	Primary	Yes	Yes	Yes	No	No	No	No	No	No	No	No	No	No	Negative	NA
FI04549	IFANADIANA	ANDRORANGAVOLA	IFD_SCS1	Spot-check	56	Male	Yes	Primary	Yes	Yes	Yes	Yes	Yes	No	No	No	No	No	No	No	No	Negative	NA
FI04550	IFANADIANA	ANDRORANGAVOLA	IFD_SCS1	Spot-check	53	Male	Yes	Primary	Yes	Yes	Yes	Yes	Yes	Yes	No	No	Yes	No	No	No	No	Negative	NA
FI04551	IFANADIANA	ANDRORANGAVOLA	IFD_SCS1	Spot-check	30	Female	Yes	Secondary or higher	Yes	Yes	Yes	No	No	Yes	No	No	Yes	No	No	No	Yes	Negative	NA
FI04552	IFANADIANA	ANDRORANGAVOLA	IFD_SCS1	Spot-check	54	Male	Yes	Primary	Yes	Yes	Yes	Yes	Yes	Yes	No	Yes	Yes	No	No	No	Yes	Negative	NA
FI04553	IFANADIANA	ANDRORANGAVOLA	IFD_SCS1	Spot-check	15	Female	Yes	Primary	Yes	Yes	Yes	Yes	Yes	No	No	No	No	No	No	No	No	Negative	NA
FI04554	IFANADIANA	ANDRORANGAVOLA	IFD_SCS1	Spot-check	19	Male	Yes	Secondary or higher	Yes	Yes	Yes	Yes	Yes	No	No	No	No	No	No	No	No	Negative	NA
FI04555	IFANADIANA	ANDRORANGAVOLA	IFD_SCS1	Spot-check	57	Male	Yes	Primary	Yes	Yes	Yes	Yes	Yes	Yes	No	Yes	Yes	No	No	No	Yes	Negative	NA
FI04556	IFANADIANA	ANDRORANGAVOLA	IFD_SCS1	Spot-check	60	Female	Yes	Secondary or higher	Yes	Yes	Yes	Yes	Yes	Yes	No	Yes	Yes	No	No	No	No	Negative	NA
FI04557	IFANADIANA	ANDRORANGAVOLA	IFD_SCS1	Spot-check	25	Male	Yes	Secondary or higher	Yes	Yes	Yes	Yes	Yes	Yes	No	Yes	Yes	No	No	No	Yes	Negative	NA
FI04558	IFANADIANA	ANDRORANGAVOLA	IFD_SCS1	Spot-check	20	Female	Yes	Primary	Yes	Yes	Yes	Yes	Yes	Yes	No	No	Yes	No	No	No	Yes	Negative	NA
FI04559	IFANADIANA	ANDRORANGAVOLA	IFD_SCS1	Spot-check	28	Male	Yes	Primary	Yes	Yes	Yes	Yes	Yes	Yes	No	Yes	Yes	No	No	No	No	Negative	NA
FI04560	IFANADIANA	ANDRORANGAVOLA	IFD_SCS1	Spot-check	34	Male	No	No education	No	No	No	NA	NA	Yes	No	No	Yes	No	No	No	No	Negative	NA
FI04561	IFANADIANA	ANDRORANGAVOLA	IFD_SCS1	Spot-check	20	Female	Yes	Primary	Yes	Yes	Yes	Yes	Yes	No	No	No	No	No	No	No	No	Negative	NA
FI04562	IFANADIANA	ANDRORANGAVOLA	IFD_SCS1	Spot-check	17	Male	No	No education	Yes	Yes	Yes	No	No	No	No	No	No	No	No	No	No	Negative	NA
FI04563	IFANADIANA	ANDRORANGAVOLA	IFD_SCS1	Spot-check	8	Female	Yes	Primary	Yes	Yes	Yes	Yes	Yes	No	No	No	No	No	No	No	No	Negative	NA
FI04564	IFANADIANA	ANDRORANGAVOLA	IFD_SCS1	Spot-check	46	Male	Yes	Primary	Yes	Yes	Yes	Yes	Yes	Yes	No	Yes	Yes	No	No	No	Yes	Negative	NA
FI04565	IFANADIANA	ANDRORANGAVOLA	IFD_SCS1	Spot-check	35	Female	Yes	Primary	Yes	Yes	Yes	Yes	No	Yes	No	Yes	Yes	No	No	No	Yes	Negative	NA
FI04566	IFANADIANA	ANDRORANGAVOLA	IFD_SCS1	Spot-check	10	Male	Yes	Primary	Yes	Yes	No	Yes	Yes	No	No	No	No	No	No	No	No	Negative	NA
FI04567	IFANADIANA	ANDRORANGAVOLA	IFD_SCS1	Spot-check	15	Male	Yes	Primary	Yes	Yes	Yes	Yes	Yes	No	No	No	No	No	No	No	No	Negative	NA
FI04568	IFANADIANA	ANDRORANGAVOLA	IFD_SCS1	Spot-check	12	Male	Yes	Primary	Yes	Yes	No	NA	Yes	No	No	No	No	No	No	No	No	Negative	NA
FI04569	IFANADIANA	ANDRORANGAVOLA	IFD_SCS1	Spot-check	5	Male	Yes	Primary	Yes	Yes	Yes	NA	NA	No	No	No	No	No	No	No	No	Negative	NA
FI04570	IFANADIANA	ANDRORANGAVOLA	IFD_SCS1	Spot-check	13	Female	Yes	Primary	No	No	No	NA	NA	No	No	No	No	No	No	No	No	Negative	NA
FI04571	IFANADIANA	ANDRORANGAVOLA	IFD_SCS1	Spot-check	8	Female	Yes	Primary	Yes	NA	Yes	NA	Yes	No	No	No	No	No	No	No	No	Negative	NA
FI04572	IFANADIANA	ANDRORANGAVOLA	IFD_SCS1	Spot-check	23	Female	Yes	Primary	Yes	Yes	Yes	Yes	Yes	Yes	No	No	Yes	No	No	No	No	Negative	NA
FI04573	IFANADIANA	ANDRORANGAVOLA	IFD_SCS1	Spot-check	11	Male	Yes	Primary	Yes	Yes	No	Yes	Yes	No	No	No	No	No	No	No	No	Negative	NA
FI04574	IFANADIANA	ANDRORANGAVOLA	IFD_SCS1	Spot-check	15	Male	Yes	Primary	Yes	Yes	Yes	Yes	Yes	No	No	No	No	No	No	No	No	Negative	NA
FI04575	IFANADIANA	ANDRORANGAVOLA	IFD_SCS1	Spot-check	33	Female	Yes	Primary	Yes	Yes	Yes	Yes	Yes	Yes	No	No	Yes	No	No	No	Yes	Negative	NA
FI04576	IFANADIANA	ANDRORANGAVOLA	IFD_SCS1	Spot-check	60	Female	Yes	Primary	Yes	Yes	Yes	Yes	No	No	No	No	No	No	No	No	No	Negative	NA
FI04577	IFANADIANA	ANDRORANGAVOLA	IFD_SCS1	Spot-check	12	Male	Yes	Primary	Yes	Yes	No	No	No	No	No	No	No	No	No	No	No	Negative	NA
FI04578	IFANADIANA	ANDRORANGAVOLA	IFD_SCS1	Spot-check	7	Female	Yes	Primary	Yes	No	No	NA	Yes	No	No	No	No	No	No	No	No	Negative	NA
FI04579	IFANADIANA	ANDRORANGAVOLA	IFD_SCS1	Spot-check	10	Male	Yes	Primary	No	No	No	NA	NA	No	No	No	No	No	No	No	No	Negative	NA
FI04580	IFANADIANA	ANDRORANGAVOLA	IFD_SCS1	Spot-check	14	Male	Yes	Primary	No	No	No	NA	NA	No	No	No	No	No	No	No	No	Negative	NA
FI04581	IFANADIANA	ANDRORANGAVOLA	IFD_SCS1	Spot-check	15	Male	Yes	Primary	Yes	Yes	Yes	No	No	No	No	No	No	No	No	No	No	Negative	NA
FI04582	IFANADIANA	ANDRORANGAVOLA	IFD_SCS1	Spot-check	20	Female	Yes	Primary	Yes	Yes	Yes	Yes	Yes	No	No	No	No	No	No	No	No	Negative	NA
FI04583	IFANADIANA	ANDRORANGAVOLA	IFD_SCS1	Spot-check	46	Female	Yes	Secondary or higher	Yes	Yes	Yes	Yes	Yes	No	No	No	No	No	No	No	No	Negative	NA
FI04584	IFANADIANA	ANDRORANGAVOLA	IFD_SCS1	Spot-check	28	Female	No	No education	Yes	Yes	Yes	Yes	Yes	No	No	No	No	No	No	No	No	Negative	NA
FI04585	IFANADIANA	ANDRORANGAVOLA	IFD_SCS1	Spot-check	13	Female	Yes	Primary	Yes	Yes	Yes	Yes	Yes	No	No	No	No	No	No	No	No	Negative	NA
FI04586	IFANADIANA	ANDRORANGAVOLA	IFD_SCS1	Spot-check	6	Female	Yes	Primary	Yes	No	No	NA	Yes	No	No	No	No	No	No	No	No	Negative	NA
FI04587	IFANADIANA	ANDRORANGAVOLA	IFD_SCS1	Spot-check	36	Female	Yes	Primary	No	No	No	Yes	Yes	Yes	No	Yes	Yes	No	No	No	Yes	Negative	NA
FI04588	IFANADIANA	ANDRORANGAVOLA	IFD_SCS1	Spot-check	17	Female	Yes	Secondary or higher	Yes	Yes	Yes	No	Yes	No	No	No	No	No	No	No	No	Negative	NA
FI04589	IFANADIANA	ANDRORANGAVOLA	IFD_SCS1	Spot-check	15	Male	Yes	Primary	Yes	Yes	Yes	No	No	No	No	No	No	No	No	No	No	Negative	NA
FI04590	IFANADIANA	ANDRORANGAVOLA	IFD_SCS1	Spot-check	8	Female	Yes	Primary	Yes	Yes	Yes	NA	NA	No	No	No	No	No	No	No	No	Negative	NA
FI04591	IFANADIANA	ANDRORANGAVOLA	IFD_SCS1	Spot-check	6	Male	Yes	Primary	Yes	Yes	Yes	Yes	Yes	No	No	No	No	No	No	No	No	Negative	NA
FI04592	IFANADIANA	ANDRORANGAVOLA	IFD_SCS1	Spot-check	28	Female	Yes	Primary	Yes	Yes	Yes	Yes	Yes	No	No	No	No	No	No	No	No	Negative	NA
FI04593	IFANADIANA	ANDRORANGAVOLA	IFD_SCS1	Spot-check	23	Male	Yes	Primary	Yes	Yes	No	Yes	Yes	No	No	No	No	No	No	No	No	Negative	NA
FI04594	IFANADIANA	ANDRORANGAVOLA	IFD_SCS1	Spot-check	25	Male	No	No education	Yes	Yes	No	Yes	Yes	Yes	Yes	Yes	Yes	No	No	No	Yes	Negative	NA
FI04595	IFANADIANA	ANDRORANGAVOLA	IFD_SCS1	Spot-check	46	Male	Yes	Primary	Yes	Yes	Yes	Yes	Yes	No	No	No	No	No	No	No	No	Negative	NA
FI04596	IFANADIANA	ANDRORANGAVOLA	IFD_SCS1	Spot-check	12	Male	Yes	Primary	Yes	Yes	Yes	Yes	Yes	No	No	No	No	No	No	No	No	Negative	NA
FI04597	IFANADIANA	ANDRORANGAVOLA	IFD_SCS1	Spot-check	14	Male	Yes	Primary	Yes	Yes	Yes	Yes	Yes	No	No	No	No	No	No	No	No	Negative	NA
FI04598	IFANADIANA	ANDRORANGAVOLA	IFD_SCS1	Spot-check	25	Female	Yes	Primary	Yes	Yes	Yes	Yes	Yes	No	No	No	No	No	No	No	No	Negative	NA
FI04599	IFANADIANA	ANDRORANGAVOLA	IFD_SCS1	Spot-check	34	Female	No	No education	Yes	Yes	Yes	Yes	Yes	No	No	No	No	No	No	No	No	Negative	NA
FI04600	IFANADIANA	ANDRORANGAVOLA	IFD_SCS1	Spot-check	80	Female	Yes	Primary	Yes	Yes	Yes	No	No	Yes	No	Yes	Yes	No	No	No	NA	Negative	NA
FI04601	IFANADIANA	ANDRORANGAVOLA	IFD_SCS1	Spot-check	15	Female	Yes	Primary	Yes	Yes	Yes	Yes	Yes	No	No	No	No	No	No	No	No	Negative	NA
FI04602	IFANADIANA	ANDRORANGAVOLA	IFD_SCS1	Spot-check	16	Female	Yes	Primary	Yes	Yes	Yes	Yes	Yes	Yes	No	Yes	Yes	No	No	No	Yes	Negative	NA
FI04603	IFANADIANA	ANDRORANGAVOLA	IFD_SCS1	Spot-check	8	Male	Yes	Primary	Yes	Yes	Yes	Yes	Yes	No	No	No	No	No	No	No	No	Negative	NA
FI04604	IFANADIANA	ANDRORANGAVOLA	IFD_SCS1	Spot-check	12	Female	Yes	Primary	Yes	Yes	No	Yes	Yes	No	No	No	No	No	No	No	No	Negative	NA
FI04605	IFANADIANA	ANDRORANGAVOLA	IFD_SCS1	Spot-check	9	Female	Yes	Primary	No	No	No	NA	NA	No	No	No	No	No	No	No	No	Negative	NA
FI04606	IFANADIANA	ANDRORANGAVOLA	IFD_SCS1	Spot-check	6	Male	Yes	Primary	Yes	Yes	Yes	NA	NA	No	No	No	No	No	No	No	No	Negative	NA
FI04607	IFANADIANA	ANDRORANGAVOLA	IFD_SCS1	Spot-check	12	Male	Yes	Primary	Yes	Yes	Yes	Yes	Yes	No	No	No	No	No	No	No	No	Negative	NA
FI04608	IFANADIANA	ANDRORANGAVOLA	IFD_SCS1	Spot-check	10	Female	Yes	Primary	Yes	Yes	Yes	No	No	No	No	No	No	No	No	No	No	Negative	NA
FI04609	IFANADIANA	ANDRORANGAVOLA	IFD_SCS1	Spot-check	10	Female	Yes	Primary	Yes	Yes	No	Yes	Yes	No	No	No	No	No	No	No	No	Negative	NA
FI04610	IFANADIANA	ANDRORANGAVOLA	IFD_SCS1	Spot-check	11	Male	Yes	Primary	Yes	Yes	Yes	Yes	Yes	No	No	No	No	No	No	No	No	Negative	NA
FI04611	IFANADIANA	ANDRORANGAVOLA	IFD_SCS1	Spot-check	9	Male	Yes	Primary	Yes	Yes	Yes	Yes	Yes	No	No	No	No	No	No	No	No	Negative	NA
FI04612	IFANADIANA	ANDRORANGAVOLA	IFD_SCS1	Spot-check	5	Female	Yes	Primary	Yes	Yes	Yes	Yes	Yes	No	No	No	No	No	No	No	No	Negative	NA
FI04613	IFANADIANA	ANDRORANGAVOLA	IFD_SCS1	Spot-check	10	Male	Yes	Primary	Yes	Yes	Yes	Yes	Yes	No	No	No	No	No	No	No	No	Negative	NA
FI04614	IFANADIANA	ANDRORANGAVOLA	IFD_SCS1	Spot-check	6	Female	Yes	Primary	Yes	Yes	Yes	Yes	Yes	No	No	No	No	No	No	No	No	Negative	NA
FI04615	IFANADIANA	ANDRORANGAVOLA	IFD_SCS1	Spot-check	5	Female	Yes	Primary	Yes	Yes	Yes	No	No	No	No	No	No	No	No	No	No	Negative	NA
FI04616	IFANADIANA	ANDRORANGAVOLA	IFD_SCS1	Spot-check	9	Male	Yes	Primary	Yes	Yes	Yes	No	No	No	No	No	No	No	No	No	No	Negative	NA
FI04617	IFANADIANA	ANDRORANGAVOLA	IFD_SCS1	Spot-check	12	Female	Yes	Primary	Yes	Yes	Yes	No	No	No	No	No	No	No	No	No	No	Negative	NA
FI04618	IFANADIANA	ANDRORANGAVOLA	IFD_SCS1	Spot-check	5	Female	Yes	Primary	Yes	Yes	Yes	No	No	No	No	No	No	No	No	No	No	Negative	NA
FI04619	IFANADIANA	ANDRORANGAVOLA	IFD_SCS1	Spot-check	6	Female	Yes	Primary	Yes	Yes	Yes	NA	NA	No	No	No	No	No	No	No	No	Negative	NA
FI04620	IFANADIANA	ANDRORANGAVOLA	IFD_SCS1	Spot-check	8	Female	Yes	Primary	Yes	Yes	Yes	NA	NA	No	No	No	No	No	No	No	No	Negative	NA
FI04621	IFANADIANA	ANDRORANGAVOLA	IFD_SCS1	Spot-check	22	Male	Yes	Secondary or higher	Yes	Yes	Yes	Yes	Yes	Yes	No	No	Yes	No	No	No	No	Negative	NA
FI04622	IFANADIANA	ANDRORANGAVOLA	IFD_SCS1	Spot-check	7	Female	Yes	Primary	Yes	Yes	Yes	No	No	No	No	No	No	No	No	No	No	Negative	NA
FI04623	IFANADIANA	ANDRORANGAVOLA	IFD_SCS1	Spot-check	40	Female	Yes	Primary	Yes	Yes	Yes	Yes	Yes	Yes	No	Yes	Yes	No	No	No	No	Negative	NA
FI04624	IFANADIANA	ANDRORANGAVOLA	IFD_SCS1	Spot-check	18	Male	Yes	Primary	Yes	Yes	Yes	No	No	Yes	No	No	Yes	No	No	No	Yes	Negative	NA
FI04625	IFANADIANA	ANDRORANGAVOLA	IFD_SCS1	Spot-check	8	Female	Yes	Primary	Yes	Yes	Yes	No	No	No	No	No	No	No	No	No	No	Negative	NA
FI04626	IFANADIANA	ANDRORANGAVOLA	IFD_SCS1	Spot-check	15	Female	Yes	Secondary or higher	Yes	Yes	Yes	Yes	Yes	No	No	No	No	No	No	No	No	Negative	NA
FI04627	IFANADIANA	ANDRORANGAVOLA	IFD_SCS1	Spot-check	13	Female	Yes	Primary	Yes	Yes	Yes	No	No	No	No	No	No	No	No	No	No	Negative	NA
FI04628	IFANADIANA	ANDRORANGAVOLA	IFD_SCS1	Spot-check	15	Male	Yes	Primary	Yes	Yes	Yes	Yes	Yes	No	No	No	No	No	No	No	No	Negative	NA
FI04629	IFANADIANA	ANDRORANGAVOLA	IFD_SCS1	Spot-check	7	Female	Yes	Primary	Yes	Yes	Yes	No	No	No	No	No	No	No	No	No	No	Negative	NA
FI04630	IFANADIANA	ANDRORANGAVOLA	IFD_SCS1	Spot-check	10	Male	Yes	Primary	No	No	No	NA	NA	No	No	No	No	No	No	No	No	Negative	NA
FI04631	IFANADIANA	ANDRORANGAVOLA	IFD_SCS1	Spot-check	9	Male	Yes	Primary	Yes	Yes	Yes	No	No	No	No	No	No	No	No	No	No	Negative	NA
FI04632	IFANADIANA	ANDRORANGAVOLA	IFD_SCS1	Spot-check	30	Female	Yes	Secondary or higher	Yes	Yes	Yes	Yes	Yes	Yes	No	Yes	Yes	No	No	No	Yes	Negative	NA
FI04633	IFANADIANA	ANDRORANGAVOLA	IFD_SCS1	Spot-check	12	Female	Yes	Primary	No	No	No	NA	NA	No	No	No	No	No	No	No	No	Negative	NA
FI04634	IFANADIANA	ANDRORANGAVOLA	IFD_SCS1	Spot-check	17	Female	Yes	Primary	Yes	Yes	Yes	Yes	Yes	No	No	No	No	No	No	No	No	Negative	NA
FI04635	IFANADIANA	ANDRORANGAVOLA	IFD_SCS1	Spot-check	13	Male	Yes	Primary	Yes	Yes	Yes	No	No	No	No	No	No	No	No	No	No	Negative	NA
FI04636	IFANADIANA	ANDRORANGAVOLA	IFD_SCS1	Spot-check	25	Female	No	No education	Yes	Yes	Yes	Yes	Yes	Yes	No	No	Yes	No	No	No	Yes	Negative	NA
FI04637	IFANADIANA	ANDRORANGAVOLA	IFD_SCS1	Spot-check	36	Male	Yes	Primary	Yes	Yes	No	No	No	Yes	No	No	Yes	No	No	No	Yes	Negative	NA
FI04638	IFANADIANA	ANDRORANGAVOLA	IFD_SCS1	Spot-check	15	Female	Yes	Primary	Yes	Yes	No	Yes	Yes	No	No	No	No	No	No	No	No	Negative	NA
FI04639	IFANADIANA	ANDRORANGAVOLA	IFD_SCS1	Spot-check	17	Female	Yes	Primary	Yes	Yes	Yes	Yes	Yes	No	No	No	No	No	No	No	No	Negative	NA
FI04640	IFANADIANA	ANDRORANGAVOLA	IFD_SCS1	Spot-check	10	Female	Yes	Primary	Yes	Yes	Yes	Yes	Yes	No	No	No	No	No	No	No	No	Negative	NA
FI04641	IFANADIANA	ANDRORANGAVOLA	IFD_SCS1	Spot-check	6	Male	Yes	Primary	Yes	Yes	Yes	No	No	No	No	No	No	No	No	No	No	Negative	NA
FI04642	IFANADIANA	ANDRORANGAVOLA	IFD_SCS1	Spot-check	27	Male	No	No education	Yes	Yes	No	Yes	Yes	Yes	No	No	Yes	No	No	No	No	Negative	NA
FI04643	IFANADIANA	ANDRORANGAVOLA	IFD_SCS1	Spot-check	11	Male	Yes	Primary	Yes	Yes	Yes	NA	NA	No	No	No	No	No	No	No	No	Negative	NA
FI04644	IFANADIANA	ANDRORANGAVOLA	IFD_SCS1	Spot-check	34	Male	Yes	Primary	Yes	Yes	No	Yes	Yes	No	No	No	No	No	No	No	No	Negative	NA
FI04645	IFANADIANA	ANDRORANGAVOLA	IFD_SCS1	Spot-check	18	Female	Yes	Primary	Yes	Yes	Yes	Yes	Yes	No	No	No	No	No	No	No	No	Negative	NA
FI04646	IFANADIANA	ANDRORANGAVOLA	IFD_SCS1	Spot-check	6	Male	Yes	Primary	Yes	Yes	Yes	No	No	No	No	No	No	No	No	No	No	Negative	NA
FI04647	IFANADIANA	ANDRORANGAVOLA	IFD_SCS1	Spot-check	6	Female	Yes	Primary	Yes	Yes	Yes	Yes	Yes	No	No	No	No	No	No	No	No	Negative	NA
FI04648	IFANADIANA	ANDRORANGAVOLA	IFD_SCS1	Spot-check	10	Female	Yes	Primary	Yes	Yes	Yes	Yes	Yes	No	No	No	No	No	No	No	No	Negative	NA
FI04649	IFANADIANA	ANDRORANGAVOLA	IFD_SCS1	Spot-check	15	Female	Yes	Primary	Yes	Yes	Yes	No	No	No	No	No	No	No	No	No	No	Negative	NA
FI04650	IFANADIANA	ANDRORANGAVOLA	IFD_SCS1	Spot-check	14	Male	No	No education	Yes	Yes	Yes	No	No	No	No	No	No	No	No	No	No	Negative	NA
FI04651	IFANADIANA	ANDRORANGAVOLA	IFD_SCS1	Spot-check	21	Male	Yes	Primary	Yes	No	No	Yes	Yes	Yes	No	No	Yes	No	No	No	No	Negative	NA
FI04652	IFANADIANA	ANDRORANGAVOLA	IFD_SCS1	Spot-check	10	Female	Yes	Primary	Yes	Yes	Yes	Yes	No	No	No	No	No	No	No	No	No	Negative	NA
FI04653	IFANADIANA	ANDRORANGAVOLA	IFD_SCS1	Spot-check	15	Male	Yes	Primary	No	No	No	NA	NA	No	No	No	No	No	No	No	No	Negative	NA
FI04654	IFANADIANA	ANDRORANGAVOLA	IFD_SCS1	Spot-check	11	Female	Yes	Primary	Yes	Yes	Yes	No	No	No	No	No	No	No	No	No	No	Negative	NA
FI04655	IFANADIANA	ANDRORANGAVOLA	IFD_SCS1	Spot-check	16	Female	Yes	Primary	No	No	No	NA	NA	No	No	No	No	No	No	No	No	Negative	NA
FI04656	IFANADIANA	ANDRORANGAVOLA	IFD_SCS1	Spot-check	12	Female	Yes	Primary	Yes	Yes	Yes	Yes	Yes	No	No	No	No	No	No	No	No	Negative	NA
FI04657	IFANADIANA	ANDRORANGAVOLA	IFD_SCS1	Spot-check	27	Male	Yes	Secondary or higher	Yes	Yes	Yes	Yes	Yes	Yes	No	No	Yes	No	No	No	Yes	Negative	NA
FI04658	IFANADIANA	ANDRORANGAVOLA	IFD_SCS1	Spot-check	11	Male	Yes	Primary	Yes	Yes	No	No	NA	No	No	No	No	No	No	No	No	Negative	NA
FI04659	IFANADIANA	ANDRORANGAVOLA	IFD_SCS1	Spot-check	12	Male	Yes	Primary	Yes	Yes	Yes	No	No	No	No	No	No	No	No	No	No	Negative	NA
FI04660	IFANADIANA	ANDRORANGAVOLA	IFD_SCS1	Spot-check	6	Male	Yes	Primary	Yes	Yes	Yes	No	No	No	No	No	No	No	No	No	No	Negative	NA
FI04661	IFANADIANA	ANDRORANGAVOLA	IFD_SCS1	Spot-check	24	Female	Yes	Primary	Yes	Yes	Yes	Yes	Yes	No	No	No	No	No	No	No	No	Negative	NA
FI04662	IFANADIANA	ANDRORANGAVOLA	IFD_SCS1	Spot-check	9	Male	Yes	Primary	Yes	Yes	Yes	No	No	No	No	No	No	No	No	No	No	Negative	NA
FI04663	IFANADIANA	ANDRORANGAVOLA	IFD_SCS1	Spot-check	13	Male	Yes	Primary	Yes	Yes	Yes	Yes	Yes	No	No	No	No	No	No	No	No	Negative	NA
FI04664	IFANADIANA	ANDRORANGAVOLA	IFD_SCS1	Spot-check	16	Female	Yes	Primary	Yes	Yes	No	Yes	Yes	No	No	No	No	No	No	No	No	Negative	NA
FI04665	IFANADIANA	ANDRORANGAVOLA	IFD_SCS1	Spot-check	25	Male	Yes	Secondary or higher	No	No	No	NA	NA	Yes	No	Yes	Yes	No	No	No	No	Negative	NA
FI04666	IFANADIANA	ANDRORANGAVOLA	IFD_SCS1	Spot-check	38	Male	Yes	Primary	No	No	No	NA	NA	Yes	No	No	No	No	No	No	NA	Negative	NA
FI04667	IFANADIANA	ANDRORANGAVOLA	IFD_SCS1	Spot-check	10	Male	Yes	Primary	Yes	Yes	No	Yes	No	No	No	No	No	No	No	No	No	Negative	NA
FI04668	IFANADIANA	ANDRORANGAVOLA	IFD_SCS1	Spot-check	35	Male	No	No education	Yes	Yes	Yes	No	No	Yes	No	Yes	No	No	No	No	Yes	Negative	NA
FI04669	IFANADIANA	ANDRORANGAVOLA	IFD_SCS1	Spot-check	8	Female	Yes	Primary	Yes	Yes	Yes	Yes	Yes	No	No	No	No	No	No	No	No	Negative	NA
FI04670	IFANADIANA	ANDRORANGAVOLA	IFD_SCS1	Spot-check	13	Male	Yes	Primary	Yes	Yes	Yes	No	No	No	No	No	No	No	No	No	No	Negative	NA
FI04671	IFANADIANA	ANDRORANGAVOLA	IFD_SCS1	Spot-check	10	Male	Yes	Primary	Yes	Yes	Yes	Yes	Yes	No	No	No	No	No	No	No	No	Negative	NA
FI04672	IFANADIANA	ANDRORANGAVOLA	IFD_SCS1	Spot-check	10	Male	Yes	Primary	No	No	No	NA	NA	No	No	No	No	No	No	No	No	Negative	NA
FI04673	IFANADIANA	ANDRORANGAVOLA	IFD_SCS1	Spot-check	8	Male	Yes	Primary	No	No	No	NA	NA	No	No	No	No	No	No	No	No	Negative	NA
FI04674	IFANADIANA	ANDRORANGAVOLA	IFD_SCS1	Spot-check	5	Male	Yes	Primary	Yes	Yes	Yes	Yes	Yes	No	No	No	No	No	No	No	No	Negative	NA
FI04675	IFANADIANA	ANDRORANGAVOLA	IFD_SCS1	Spot-check	10	Male	Yes	Primary	Yes	Yes	No	NA	NA	No	No	No	No	No	No	No	No	Negative	NA
FI04676	IFANADIANA	ANDRORANGAVOLA	IFD_SCS1	Spot-check	10	Female	Yes	Primary	Yes	Yes	No	Yes	Yes	No	No	No	No	No	No	No	No	Negative	NA
FI04677	IFANADIANA	ANDRORANGAVOLA	IFD_SCS1	Spot-check	5	Male	Yes	Primary	Yes	Yes	Yes	NA	NA	No	No	No	No	No	No	No	No	Negative	NA
FI04678	IFANADIANA	ANDRORANGAVOLA	IFD_SCS1	Spot-check	30	Female	Yes	Primary	Yes	Yes	Yes	No	No	Yes	No	Yes	Yes	No	No	No	No	Negative	NA
FI04679	IFANADIANA	ANDRORANGAVOLA	IFD_SCS1	Spot-check	6	Male	Yes	Primary	Yes	Yes	Yes	No	No	No	No	No	No	No	No	No	No	Negative	NA
FI04680	IFANADIANA	ANDRORANGAVOLA	IFD_SCS1	Spot-check	7	Male	Yes	Primary	Yes	Yes	Yes	NA	NA	No	No	No	No	No	No	No	No	Negative	NA
FI04681	IFANADIANA	ANDRORANGAVOLA	IFD_SCS1	Spot-check	7	Female	Yes	Primary	Yes	Yes	No	Yes	Yes	No	No	No	No	No	No	No	No	Negative	NA
FI04682	IFANADIANA	ANDRORANGAVOLA	IFD_SCS1	Spot-check	9	Male	Yes	Primary	Yes	Yes	Yes	No	No	No	No	No	No	No	No	No	No	Negative	NA
FI04683	IFANADIANA	ANDRORANGAVOLA	IFD_SCS1	Spot-check	11	Female	Yes	Primary	Yes	Yes	Yes	Yes	Yes	No	No	No	No	No	No	No	No	Negative	NA
FI04684	IFANADIANA	ANDRORANGAVOLA	IFD_SCS1	Spot-check	13	Female	Yes	Primary	Yes	Yes	Yes	Yes	Yes	No	No	No	No	No	No	No	No	Negative	NA
FI04685	IFANADIANA	ANDRORANGAVOLA	IFD_SCS1	Spot-check	10	Male	Yes	Primary	Yes	Yes	No	Yes	Yes	No	No	No	No	No	No	No	No	Negative	NA
FI04686	IFANADIANA	ANDRORANGAVOLA	IFD_SCS1	Spot-check	10	Male	Yes	Primary	Yes	Yes	Yes	Yes	Yes	No	No	No	No	No	No	No	No	Negative	NA
FI04687	IFANADIANA	ANDRORANGAVOLA	IFD_SCS1	Spot-check	12	Male	Yes	Primary	Yes	Yes	Yes	Yes	Yes	No	No	No	No	No	No	No	No	Negative	NA
FI04688	IFANADIANA	ANDRORANGAVOLA	IFD_SCS1	Spot-check	8	Male	Yes	Primary	Yes	Yes	No	NA	No	No	No	No	No	No	No	No	No	Negative	NA
FI04689	IFANADIANA	ANDRORANGAVOLA	IFD_SCS1	Spot-check	9	Female	Yes	Primary	Yes	Yes	No	Yes	Yes	No	No	No	No	No	No	No	No	Negative	NA
FI04690	IFANADIANA	ANDRORANGAVOLA	IFD_SCS1	Spot-check	10	Male	Yes	Primary	Yes	Yes	Yes	Yes	Yes	No	No	No	No	No	No	No	No	Negative	NA
FI04691	IFANADIANA	ANDRORANGAVOLA	IFD_SCS1	Spot-check	NA	Female	Yes	Primary	No	No	No	NA	NA	No	No	No	No	No	No	No	No	Negative	NA
FI04692	IFANADIANA	ANDRORANGAVOLA	IFD_SCS1	Spot-check	10	Female	Yes	Primary	Yes	Yes	Yes	NA	NA	No	No	No	No	No	No	No	No	Negative	NA
FI04693	IFANADIANA	ANDRORANGAVOLA	IFD_SCS1	Spot-check	6	Female	Yes	Primary	Yes	Yes	No	NA	NA	No	No	No	No	No	No	No	No	Negative	NA
FI04694	IFANADIANA	ANDRORANGAVOLA	IFD_SCS1	Spot-check	6	Male	Yes	Primary	No	No	No	NA	NA	No	No	No	No	No	No	No	No	Negative	NA
FI04695	IFANADIANA	ANDRORANGAVOLA	IFD_SCS1	Spot-check	21	Male	Yes	Primary	Yes	Yes	Yes	Yes	No	Yes	No	Yes	No	No	No	No	NA	Negative	NA
FI04696	IFANADIANA	ANDRORANGAVOLA	IFD_SCS1	Spot-check	36	Female	Yes	Primary	Yes	Yes	Yes	Yes	Yes	No	No	No	No	No	No	No	No	Negative	NA
FI04697	IFANADIANA	ANDRORANGAVOLA	IFD_SCS1	Spot-check	7	Male	Yes	Primary	No	No	No	NA	NA	No	No	No	No	No	No	No	No	Negative	NA
FI04698	IFANADIANA	ANDRORANGAVOLA	IFD_SCS1	Spot-check	14	Male	Yes	Primary	Yes	Yes	Yes	Yes	Yes	No	No	No	No	No	No	No	No	Negative	NA
FI04699	IFANADIANA	ANDRORANGAVOLA	IFD_SCS1	Spot-check	12	Female	Yes	Primary	No	No	No	NA	NA	No	No	No	No	No	No	No	No	Negative	NA
FI04700	IFANADIANA	ANDRORANGAVOLA	IFD_SCS1	Spot-check	12	Male	Yes	Primary	Yes	Yes	Yes	Yes	Yes	No	No	No	No	No	No	No	No	Negative	NA
FI04701	IFANADIANA	ANDRORANGAVOLA	IFD_SCS1	Spot-check	12	Male	Yes	Primary	No	No	No	NA	NA	NA	NA	NA	NA	NA	NA	NA	NA	Negative	NA
FI04702	IFANADIANA	ANDRORANGAVOLA	IFD_SCS1	Spot-check	18	Female	Yes	Primary	Yes	Yes	No	No	No	No	No	No	No	No	No	No	No	Negative	NA
FI04703	IFANADIANA	ANDRORANGAVOLA	IFD_SCS1	Spot-check	34	Female	Yes	Primary	Yes	Yes	Yes	NA	NA	Yes	No	Yes	Yes	No	No	No	Yes	Negative	NA
FI04704	IFANADIANA	ANDRORANGAVOLA	IFD_SCS1	Spot-check	8	Male	Yes	Primary	Yes	Yes	Yes	No	No	No	No	No	No	No	No	No	No	Negative	NA
FI04705	IFANADIANA	ANDRORANGAVOLA	IFD_SCS1	Spot-check	6	Female	Yes	Primary	Yes	Yes	Yes	No	No	No	No	No	No	No	No	No	No	Negative	NA
FI04706	IFANADIANA	ANDRORANGAVOLA	IFD_SCS1	Spot-check	8	Female	Yes	Primary	Yes	Yes	Yes	No	No	No	No	No	No	No	No	No	No	Negative	NA
FI04707	IFANADIANA	ANDRORANGAVOLA	IFD_SCS1	Spot-check	5	Female	No	No education	Yes	Yes	Yes	No	No	No	No	No	No	No	No	No	No	Negative	NA
FI04708	IFANADIANA	ANDRORANGAVOLA	IFD_SCS1	Spot-check	13	Female	Yes	Primary	Yes	Yes	Yes	Yes	Yes	No	No	No	No	No	No	No	No	Negative	NA
FI04709	IFANADIANA	ANDRORANGAVOLA	IFD_SCS1	Spot-check	11	Male	Yes	Primary	Yes	Yes	Yes	No	No	No	No	No	No	No	No	No	No	Negative	NA
FI04710	IFANADIANA	ANDRORANGAVOLA	IFD_SCS1	Spot-check	13	Male	Yes	Primary	Yes	Yes	Yes	Yes	Yes	No	No	No	No	No	No	No	No	Negative	NA
FI04711	IFANADIANA	ANDRORANGAVOLA	IFD_SCS1	Spot-check	12	Male	Yes	Primary	Yes	Yes	Yes	No	No	No	No	No	No	No	No	No	No	Negative	NA
FI04712	IFANADIANA	ANDRORANGAVOLA	IFD_SCS1	Spot-check	5	Male	Yes	Primary	Yes	Yes	Yes	No	No	No	No	No	No	No	No	No	No	Negative	NA
FI04713	IFANADIANA	ANDRORANGAVOLA	IFD_SCS1	Spot-check	34	Female	Yes	Primary	Yes	Yes	Yes	Yes	Yes	Yes	No	Yes	Yes	No	No	No	Yes	Negative	NA
FI04714	IFANADIANA	ANDRORANGAVOLA	IFD_SCS1	Spot-check	10	Male	Yes	Primary	Yes	Yes	Yes	Yes	Yes	No	No	No	No	No	No	No	No	Negative	NA
FI04715	IFANADIANA	ANDRORANGAVOLA	IFD_SCS1	Spot-check	13	Female	Yes	Primary	Yes	Yes	Yes	No	No	No	No	No	No	No	No	No	No	Negative	NA
FI04716	IFANADIANA	ANDRORANGAVOLA	IFD_SCS1	Spot-check	14	Female	Yes	Primary	Yes	Yes	Yes	Yes	Yes	No	No	No	No	No	No	No	No	Negative	NA
FI04717	IFANADIANA	ANDRORANGAVOLA	IFD_SCS1	Spot-check	12	Male	Yes	Primary	Yes	Yes	Yes	Yes	Yes	No	No	No	No	No	No	No	No	Negative	NA
FI04718	IFANADIANA	ANDRORANGAVOLA	IFD_SCS1	Spot-check	10	Male	Yes	Primary	Yes	Yes	Yes	Yes	Yes	No	No	No	No	No	No	No	No	Negative	NA
FI04719	IFANADIANA	ANDRORANGAVOLA	IFD_SCS1	Spot-check	10	Female	Yes	Primary	Yes	Yes	Yes	No	No	No	No	No	No	No	No	No	No	Negative	NA
FI04720	IFANADIANA	ANDRORANGAVOLA	IFD_SCS1	Spot-check	10	Male	Yes	Primary	Yes	Yes	Yes	No	No	No	No	No	No	No	No	No	No	Negative	NA
FI04721	IFANADIANA	ANDRORANGAVOLA	IFD_SCS1	Spot-check	6	Female	Yes	Primary	Yes	Yes	Yes	No	No	No	No	No	No	No	No	No	No	Negative	NA
FI04722	IFANADIANA	ANDRORANGAVOLA	IFD_SCS1	Spot-check	31	Female	No	No education	Yes	Yes	Yes	No	No	No	No	No	No	No	No	No	No	Negative	NA
FI04723	IFANADIANA	ANDRORANGAVOLA	IFD_SCS1	Spot-check	25	Male	Yes	Primary	Yes	Yes	Yes	Yes	Yes	Yes	No	No	Yes	No	No	No	No	Negative	NA
FI04724	IFANADIANA	ANDRORANGAVOLA	IFD_SCS1	Spot-check	5	Male	Yes	Primary	Yes	Yes	Yes	No	No	No	No	No	No	No	No	No	No	Negative	NA
FI04725	IFANADIANA	ANDRORANGAVOLA	IFD_SCS1	Spot-check	6	Male	Yes	Primary	Yes	Yes	Yes	No	No	No	No	No	No	No	No	No	No	Negative	NA
FI04726	IFANADIANA	ANDRORANGAVOLA	IFD_SCS1	Spot-check	6	Female	Yes	Primary	Yes	Yes	Yes	No	No	No	No	No	No	No	No	No	No	Negative	NA
FI04727	IFANADIANA	ANDRORANGAVOLA	IFD_SCS1	Spot-check	13	Female	Yes	Primary	Yes	Yes	Yes	No	No	No	No	No	No	No	No	No	No	Negative	NA
FI04728	IFANADIANA	ANDRORANGAVOLA	IFD_SCS1	Spot-check	40	Female	Yes	Primary	Yes	Yes	Yes	No	No	Yes	Yes	Yes	Yes	No	No	No	No	Negative	NA
FI04729	IFANADIANA	ANDRORANGAVOLA	IFD_SCS1	Spot-check	12	Female	Yes	Primary	Yes	Yes	Yes	Yes	Yes	No	No	No	No	No	No	No	No	Negative	NA
FI04730	IFANADIANA	ANDRORANGAVOLA	IFD_SCS1	Spot-check	60	Male	Yes	Primary	Yes	Yes	Yes	Yes	No	Yes	No	Yes	Yes	No	No	No	No	Negative	NA
FI04731	IFANADIANA	ANDRORANGAVOLA	IFD_SCS1	Spot-check	30	Female	No	No education	Yes	Yes	Yes	No	No	No	No	No	No	No	No	No	No	Negative	NA
FI04732	IFANADIANA	ANDRORANGAVOLA	IFD_SCS1	Spot-check	8	Female	Yes	Primary	Yes	Yes	Yes	No	No	No	No	No	No	No	No	No	No	Negative	NA
FI04733	IFANADIANA	ANDRORANGAVOLA	IFD_SCS1	Spot-check	10	Male	Yes	Primary	Yes	Yes	Yes	No	No	No	No	No	No	No	No	No	No	Negative	NA
FI04734	IFANADIANA	ANDRORANGAVOLA	IFD_SCS1	Spot-check	7	Female	Yes	Primary	Yes	Yes	Yes	No	No	No	No	No	No	No	No	No	No	Negative	NA
FI04735	IFANADIANA	ANDRORANGAVOLA	IFD_SCS1	Spot-check	10	Male	Yes	Primary	Yes	Yes	Yes	Yes	Yes	No	No	No	No	No	No	No	No	Negative	NA
FI04736	IFANADIANA	ANDRORANGAVOLA	IFD_SCS1	Spot-check	8	Male	Yes	Primary	Yes	Yes	Yes	NA	NA	No	No	No	No	No	No	No	No	Negative	NA
FI04737	IFANADIANA	ANDRORANGAVOLA	IFD_SCS1	Spot-check	10	Male	Yes	Primary	Yes	Yes	Yes	Yes	Yes	No	No	No	No	No	No	No	No	Negative	NA
FI04738	IFANADIANA	ANDRORANGAVOLA	IFD_SCS1	Spot-check	7	Female	Yes	Primary	Yes	Yes	Yes	Yes	Yes	No	No	No	No	No	No	No	No	Negative	NA
FI04739	IFANADIANA	ANDRORANGAVOLA	IFD_SCS1	Spot-check	14	Male	Yes	Primary	Yes	No	No	Yes	Yes	No	No	No	No	No	No	No	No	Negative	NA
FI04740	IFANADIANA	ANDRORANGAVOLA	IFD_SCS1	Spot-check	11	Male	Yes	Primary	Yes	Yes	Yes	Yes	Yes	No	No	No	No	No	No	No	No	Negative	NA
FI04741	IFANADIANA	ANDRORANGAVOLA	IFD_SCS1	Spot-check	14	Female	Yes	Primary	Yes	Yes	Yes	Yes	Yes	No	No	No	No	No	No	No	No	Negative	NA
FI04742	IFANADIANA	ANDRORANGAVOLA	IFD_SCS1	Spot-check	12	Male	Yes	Primary	Yes	Yes	Yes	Yes	Yes	No	No	No	No	No	No	No	No	Negative	NA
FI04743	IFANADIANA	ANDRORANGAVOLA	IFD_SCS1	Spot-check	40	Female	No	No education	Yes	Yes	Yes	Yes	Yes	Yes	No	No	Yes	No	No	No	Yes	Negative	NA
FI04744	IFANADIANA	ANDRORANGAVOLA	IFD_SCS1	Spot-check	10	Male	Yes	Primary	Yes	Yes	Yes	Yes	Yes	No	No	No	No	No	No	No	No	Negative	NA
FI04745	IFANADIANA	ANDRORANGAVOLA	IFD_SCS1	Spot-check	30	Male	Yes	Primary	Yes	Yes	Yes	Yes	Yes	Yes	No	No	Yes	No	No	No	Yes	Negative	NA
FI04746	IFANADIANA	ANDRORANGAVOLA	IFD_SCS1	Spot-check	6	Female	Yes	Primary	Yes	Yes	Yes	NA	NA	No	No	No	No	No	No	No	No	Negative	NA
FI04747	IFANADIANA	ANDRORANGAVOLA	IFD_SCS1	Spot-check	25	Male	Yes	Primary	Yes	Yes	No	Yes	Yes	Yes	No	No	Yes	No	No	No	No	Negative	NA
FI04748	IFANADIANA	ANDRORANGAVOLA	IFD_SCS1	Spot-check	6	Male	Yes	Primary	Yes	Yes	Yes	NA	NA	No	No	No	No	No	No	No	No	Negative	NA
FI04749	IFANADIANA	ANDRORANGAVOLA	IFD_SCS1	Spot-check	6	Male	Yes	Primary	Yes	Yes	Yes	No	No	No	No	No	No	No	No	No	No	Negative	NA
FI04750	IFANADIANA	ANDRORANGAVOLA	IFD_SCS1	Spot-check	11	Male	Yes	Primary	Yes	Yes	Yes	Yes	Yes	No	No	No	No	No	No	No	No	Negative	NA
FI04751	IFANADIANA	ANDRORANGAVOLA	IFD_SCS1	Spot-check	7	Male	Yes	Primary	Yes	Yes	Yes	Yes	Yes	No	No	No	No	No	No	No	No	Negative	NA
FI04752	IFANADIANA	ANDRORANGAVOLA	IFD_SCS1	Spot-check	8	Female	Yes	Primary	Yes	Yes	Yes	No	No	No	No	No	No	No	No	No	No	Negative	NA
FI04753	IFANADIANA	ANDRORANGAVOLA	IFD_SCS1	Spot-check	56	Female	Yes	Primary	Yes	Yes	Yes	Yes	Yes	Yes	No	No	Yes	No	No	No	No	Negative	NA
FI04754	IFANADIANA	ANDRORANGAVOLA	IFD_SCS1	Spot-check	11	Male	Yes	Primary	Yes	Yes	Yes	Yes	Yes	No	No	No	No	No	No	No	No	Negative	NA
FI04755	IFANADIANA	ANDRORANGAVOLA	IFD_SCS1	Spot-check	53	Male	No	No education	Yes	Yes	Yes	No	No	No	No	No	No	No	No	No	No	Negative	NA
FI04756	IFANADIANA	ANDRORANGAVOLA	IFD_SCS1	Spot-check	12	Female	Yes	Primary	Yes	Yes	Yes	Yes	Yes	No	No	No	No	No	No	No	No	Negative	NA
FI04757	IFANADIANA	ANDRORANGAVOLA	IFD_SCS1	Spot-check	12	Male	Yes	Primary	Yes	Yes	Yes	Yes	Yes	No	No	No	No	No	No	No	No	Negative	NA
FI04758	IFANADIANA	ANDRORANGAVOLA	IFD_SCS1	Spot-check	47	Female	Yes	Primary	Yes	Yes	Yes	No	No	Yes	No	No	Yes	No	No	No	Yes	Negative	NA
FI04759	IFANADIANA	ANDRORANGAVOLA	IFD_SCS1	Spot-check	30	Female	No	No education	Yes	Yes	Yes	Yes	No	Yes	No	Yes	Yes	No	No	No	No	Negative	NA
FI04760	IFANADIANA	ANDRORANGAVOLA	IFD_SCS1	Spot-check	7	Male	Yes	Primary	Yes	No	No	No	No	No	No	No	No	No	No	No	No	Negative	NA
FI04761	IFANADIANA	ANDRORANGAVOLA	IFD_SCS1	Spot-check	10	Female	Yes	Primary	Yes	Yes	Yes	Yes	Yes	No	No	No	No	No	No	No	No	Negative	NA
FI04762	IFANADIANA	ANDRORANGAVOLA	IFD_SCS1	Spot-check	11	Female	Yes	Primary	Yes	Yes	Yes	No	No	No	No	No	No	No	No	No	No	Negative	NA
FI04763	IFANADIANA	ANDRORANGAVOLA	IFD_SCS1	Spot-check	9	Male	Yes	Primary	Yes	No	No	Yes	Yes	No	No	No	No	No	No	No	No	Negative	NA
FI04764	IFANADIANA	ANDRORANGAVOLA	IFD_SCS1	Spot-check	8	Female	Yes	Primary	No	No	No	NA	NA	No	No	No	No	No	No	No	No	Negative	NA
FI04765	IFANADIANA	ANDRORANGAVOLA	IFD_SCS1	Spot-check	7	Female	Yes	Primary	Yes	Yes	Yes	Yes	Yes	No	No	No	No	No	No	No	No	Negative	NA
FI04766	IFANADIANA	ANDRORANGAVOLA	IFD_SCS1	Spot-check	14	Male	Yes	Primary	Yes	No	No	Yes	Yes	No	No	No	No	No	No	No	No	Negative	NA
FI04767	IFANADIANA	ANDRORANGAVOLA	IFD_SCS1	Spot-check	8	Female	Yes	Primary	Yes	Yes	Yes	Yes	Yes	No	No	No	No	No	No	No	No	Negative	NA
FI04768	IFANADIANA	ANDRORANGAVOLA	IFD_SCS1	Spot-check	12	Male	Yes	Primary	Yes	Yes	Yes	Yes	Yes	No	No	No	No	No	No	No	No	Negative	NA
FI04769	IFANADIANA	ANDRORANGAVOLA	IFD_SCS1	Spot-check	8	Male	Yes	Primary	Yes	Yes	No	Yes	Yes	No	No	No	No	No	No	No	No	Negative	NA
FI04770	IFANADIANA	ANDRORANGAVOLA	IFD_SCS1	Spot-check	10	Male	Yes	Primary	Yes	Yes	Yes	Yes	Yes	No	No	No	No	No	No	No	No	Negative	NA
FI04771	IFANADIANA	ANDRORANGAVOLA	IFD_SCS1	Spot-check	6	Female	Yes	Primary	Yes	Yes	Yes	No	No	No	No	No	No	No	No	No	No	Negative	NA
FI04772	IFANADIANA	ANDRORANGAVOLA	IFD_SCS1	Spot-check	12	Male	Yes	Primary	Yes	No	No	Yes	Yes	No	No	No	No	No	No	No	No	Negative	NA
FI04773	IFANADIANA	ANDRORANGAVOLA	IFD_SCS1	Spot-check	15	Female	Yes	Primary	Yes	Yes	Yes	Yes	Yes	No	No	No	No	No	No	No	No	Negative	NA
FI04774	IFANADIANA	ANDRORANGAVOLA	IFD_SCS1	Spot-check	6	Male	Yes	Primary	Yes	Yes	Yes	Yes	Yes	No	No	No	No	No	No	No	No	Negative	NA
FI04775	IFANADIANA	ANDRORANGAVOLA	IFD_SCS1	Spot-check	12	Male	Yes	Primary	Yes	Yes	Yes	Yes	Yes	No	No	No	No	No	No	No	No	Negative	NA
FI04776	IFANADIANA	ANDRORANGAVOLA	IFD_SCS1	Spot-check	9	Female	Yes	Primary	Yes	Yes	Yes	Yes	Yes	No	No	No	No	No	No	No	No	Negative	NA
FI04777	IFANADIANA	ANDRORANGAVOLA	IFD_SCS1	Spot-check	10	Male	Yes	Primary	Yes	Yes	Yes	Yes	Yes	No	No	No	No	No	No	No	No	Negative	NA
FI04778	IFANADIANA	ANDRORANGAVOLA	IFD_SCS1	Spot-check	12	Female	Yes	Primary	Yes	Yes	Yes	Yes	Yes	No	No	No	No	No	No	No	No	Negative	NA
FI04779	IFANADIANA	ANDRORANGAVOLA	IFD_SCS1	Spot-check	10	Female	Yes	Primary	Yes	Yes	Yes	Yes	Yes	No	No	No	No	No	No	No	No	Negative	NA
FI04780	IFANADIANA	ANDRORANGAVOLA	IFD_SCS1	Spot-check	13	Male	Yes	Primary	Yes	Yes	Yes	Yes	Yes	No	No	No	No	No	No	No	No	Negative	NA
FI04781	IFANADIANA	ANDRORANGAVOLA	IFD_SCS1	Spot-check	45	Male	Yes	Secondary or higher	Yes	Yes	Yes	Yes	Yes	Yes	No	Yes	Yes	No	No	No	Yes	Negative	NA
FI04782	IFANADIANA	ANDRORANGAVOLA	IFD_SCS1	Spot-check	7	Male	Yes	Primary	Yes	Yes	Yes	Yes	Yes	No	No	No	No	No	No	No	No	Negative	NA
FI04783	IFANADIANA	ANDRORANGAVOLA	IFD_SCS1	Spot-check	12	Female	Yes	Primary	Yes	Yes	Yes	Yes	Yes	No	No	No	No	No	No	No	No	Negative	NA
FI04784	IFANADIANA	ANDRORANGAVOLA	IFD_SCS1	Spot-check	9	Female	Yes	Primary	No	No	No	NA	NA	No	No	No	No	No	No	No	No	Negative	NA
FI04785	IFANADIANA	ANDRORANGAVOLA	IFD_SCS1	Spot-check	38	Female	Yes	Primary	Yes	Yes	Yes	No	NA	No	No	No	No	No	No	No	No	Negative	NA
FI04786	IFANADIANA	ANDRORANGAVOLA	IFD_SCS1	Spot-check	11	Female	Yes	Primary	Yes	Yes	Yes	Yes	Yes	No	No	No	No	No	No	No	No	Negative	NA
FI04787	IFANADIANA	ANDRORANGAVOLA	IFD_SCS1	Spot-check	7	Male	Yes	Primary	Yes	Yes	Yes	Yes	Yes	No	No	No	No	No	No	No	No	Negative	NA
FI04788	IFANADIANA	ANDRORANGAVOLA	IFD_SCS1	Spot-check	28	Male	Yes	Primary	Yes	Yes	Yes	Yes	Yes	Yes	No	No	Yes	No	No	No	Yes	Negative	NA
FI04789	IFANADIANA	ANDRORANGAVOLA	IFD_SCS1	Spot-check	14	Male	Yes	Primary	No	No	No	NA	NA	No	No	No	No	No	No	No	No	Negative	NA
FI04790	IFANADIANA	ANDRORANGAVOLA	IFD_SCS1	Spot-check	10	Male	Yes	Primary	Yes	Yes	Yes	Yes	Yes	No	No	No	No	No	No	No	No	Negative	NA
FI04791	IFANADIANA	ANDRORANGAVOLA	IFD_SCS1	Spot-check	8	Female	Yes	Primary	Yes	Yes	Yes	Yes	Yes	No	No	No	No	No	No	No	No	Negative	NA
FI04792	IFANADIANA	ANDRORANGAVOLA	IFD_SCS1	Spot-check	9	Male	Yes	Primary	No	No	No	NA	NA	No	No	No	No	No	No	No	No	Negative	NA
FI04793	IFANADIANA	ANDRORANGAVOLA	IFD_SCS1	Spot-check	6	Male	Yes	Primary	No	No	No	NA	NA	No	No	No	No	No	No	No	No	Negative	NA
FI04794	IFANADIANA	ANDRORANGAVOLA	IFD_SCS1	Spot-check	13	Female	Yes	Primary	Yes	Yes	Yes	Yes	Yes	No	No	No	No	No	No	No	No	Negative	NA
FI04795	IFANADIANA	ANDRORANGAVOLA	IFD_SCS1	Spot-check	10	Female	Yes	Primary	Yes	Yes	Yes	Yes	Yes	No	No	No	No	No	No	No	No	Negative	NA
FI04796	IFANADIANA	ANDRORANGAVOLA	IFD_SCS1	Spot-check	7	Female	Yes	Primary	Yes	Yes	Yes	NA	NA	No	No	No	No	No	No	No	No	Negative	NA
FI04797	IFANADIANA	ANDRORANGAVOLA	IFD_SCS1	Spot-check	12	Female	Yes	Primary	Yes	Yes	Yes	Yes	Yes	No	No	No	No	No	No	No	No	Negative	NA
FI04798	IFANADIANA	ANDRORANGAVOLA	IFD_SCS1	Spot-check	12	Male	Yes	Primary	No	No	No	NA	NA	No	No	No	No	No	No	No	No	Negative	NA
FI04799	IFANADIANA	ANDRORANGAVOLA	IFD_SCS1	Spot-check	9	Male	Yes	Primary	Yes	Yes	Yes	No	No	No	No	No	No	No	No	No	No	Negative	NA
FI04800	IFANADIANA	ANDRORANGAVOLA	IFD_SCS1	Spot-check	9	Male	Yes	Primary	No	No	No	NA	NA	No	No	No	No	No	No	No	No	Negative	NA
FI10774	IFANADIANA	ANDRORANGAVOLA	IFD_SCS1	Spot-check	7	Female	Yes	Primary	Yes	Yes	Yes	Yes	Yes	No	No	No	No	No	No	No	No	Negative	NA
FI10775	IFANADIANA	ANDRORANGAVOLA	IFD_SCS1	Spot-check	12	Male	Yes	Primary	Yes	Yes	Yes	Yes	Yes	No	No	No	No	No	No	No	No	Negative	NA
FI10776	IFANADIANA	ANDRORANGAVOLA	IFD_SCS1	Spot-check	NA	Male	Yes	Primary	Yes	Yes	Yes	Yes	Yes	No	No	No	No	No	No	No	No	Negative	NA
FI10777	IFANADIANA	ANDRORANGAVOLA	IFD_SCS1	Spot-check	8	Female	Yes	Primary	Yes	Yes	Yes	Yes	Yes	No	No	No	No	No	No	No	No	Negative	NA
FI10802	IFANADIANA	ANDRORANGAVOLA	IFD_SCS1	Spot-check	8	Female	Yes	Primary	No	No	No	NA	NA	No	No	No	No	No	No	No	No	Negative	NA
FI10814	IFANADIANA	ANDRORANGAVOLA	IFD_SCS1	Spot-check	10	Female	Yes	Primary	Yes	Yes	Yes	Yes	Yes	No	No	No	No	No	No	No	No	Negative	NA
FI10815	IFANADIANA	ANDRORANGAVOLA	IFD_SCS1	Spot-check	13	Female	Yes	Primary	Yes	Yes	Yes	Yes	Yes	No	No	No	No	No	No	No	No	Negative	NA
FI10816	IFANADIANA	ANDRORANGAVOLA	IFD_SCS1	Spot-check	12	Male	Yes	Primary	Yes	Yes	Yes	Yes	Yes	No	No	No	No	No	No	No	No	Negative	NA
FI10817	IFANADIANA	ANDRORANGAVOLA	IFD_SCS1	Spot-check	10	Male	Yes	Primary	No	No	No	NA	NA	No	No	No	No	No	No	No	No	Negative	NA
FI10818	IFANADIANA	ANDRORANGAVOLA	IFD_SCS1	Spot-check	6	Female	Yes	Primary	Yes	Yes	Yes	No	No	No	No	No	No	No	No	No	No	Negative	NA
FI10819	IFANADIANA	ANDRORANGAVOLA	IFD_SCS1	Spot-check	13	Female	Yes	Primary	Yes	Yes	Yes	Yes	Yes	No	No	No	No	No	No	No	No	Negative	NA
FI10820	IFANADIANA	ANDRORANGAVOLA	IFD_SCS1	Spot-check	12	Male	Yes	Primary	Yes	Yes	Yes	Yes	Yes	No	No	No	No	No	No	No	No	Negative	NA
FI10822	IFANADIANA	ANDRORANGAVOLA	IFD_SCS1	Spot-check	6	Male	Yes	Primary	Yes	Yes	Yes	Yes	Yes	No	No	No	No	No	No	No	No	Negative	NA
FI10823	IFANADIANA	ANDRORANGAVOLA	IFD_SCS1	Spot-check	8	Male	Yes	Primary	Yes	Yes	Yes	Yes	Yes	No	No	No	No	No	No	No	No	Negative	NA
FI10825	IFANADIANA	ANDRORANGAVOLA	IFD_SCS1	Spot-check	12	Male	Yes	Primary	Yes	Yes	Yes	Yes	Yes	No	No	No	No	No	No	No	No	Negative	NA
FI10826	IFANADIANA	ANDRORANGAVOLA	IFD_SCS1	Spot-check	9	Male	Yes	Primary	Yes	Yes	Yes	Yes	Yes	No	No	No	No	No	No	No	No	Negative	NA
FI10827	IFANADIANA	ANDRORANGAVOLA	IFD_SCS1	Spot-check	12	Female	Yes	Primary	Yes	Yes	Yes	Yes	Yes	No	No	No	No	No	No	No	No	Negative	NA
FI10828	IFANADIANA	ANDRORANGAVOLA	IFD_SCS1	Spot-check	61	Male	Yes	Primary	Yes	Yes	Yes	NA	NA	No	No	No	No	No	No	No	No	Negative	NA
FI04801	MANANJARY	AMBOHIMIARINA II	MNJ_SCS1	Spot-check	55	Male	Yes	Primary	Yes	Yes	Yes	Yes	Yes	Yes	No	Yes	No	No	No	No	Yes	Positive	Negative
FI04802	MANANJARY	AMBOHIMIARINA II	MNJ_SCS1	Spot-check	45	Female	Yes	Primary	Yes	Yes	Yes	Yes	Yes	Yes	No	Yes	No	No	No	No	Yes	Negative	NA
FI04803	MANANJARY	AMBOHIMIARINA II	MNJ_SCS1	Spot-check	13	Male	No	No education	Yes	Yes	Yes	NA	No	No	No	No	No	No	No	No	No	Negative	NA
FI04804	MANANJARY	AMBOHIMIARINA II	MNJ_SCS1	Spot-check	79	Male	Yes	Primary	Yes	Yes	Yes	Yes	Yes	Yes	No	No	Yes	No	No	No	Yes	Negative	NA
FI04805	MANANJARY	AMBOHIMIARINA II	MNJ_SCS1	Spot-check	28	Male	Yes	Secondary or higher	Yes	Yes	Yes	Yes	No	Yes	No	Yes	Yes	No	No	No	Yes	Negative	NA
FI04806	MANANJARY	AMBOHIMIARINA II	MNJ_SCS1	Spot-check	23	Female	Yes	Secondary or higher	Yes	Yes	Yes	No	No	No	No	No	No	No	No	No	No	Negative	NA
FI04807	MANANJARY	AMBOHIMIARINA II	MNJ_SCS1	Spot-check	23	Male	Yes	Secondary or higher	Yes	Yes	Yes	Yes	No	No	No	No	No	No	No	No	No	Negative	NA
FI04808	MANANJARY	AMBOHIMIARINA II	MNJ_SCS1	Spot-check	24	Male	Yes	Secondary or higher	Yes	Yes	Yes	Yes	No	Yes	No	No	Yes	No	No	No	No	Negative	NA
FI04809	MANANJARY	AMBOHIMIARINA II	MNJ_SCS1	Spot-check	25	Female	Yes	Secondary or higher	Yes	NA	Yes	Yes	Yes	Yes	No	No	Yes	No	No	No	Yes	Negative	NA
FI04810	MANANJARY	AMBOHIMIARINA II	MNJ_SCS1	Spot-check	10	Female	NA	NA	Yes	Yes	Yes	No	No	No	No	No	No	No	No	No	No	Negative	NA
FI04811	MANANJARY	AMBOHIMIARINA II	MNJ_SCS1	Spot-check	20	Male	Yes	Primary	Yes	Yes	Yes	Yes	No	Yes	No	Yes	No	No	No	No	Yes	Negative	NA
FI04812	MANANJARY	AMBOHIMIARINA II	MNJ_SCS1	Spot-check	18	Female	Yes	Primary	Yes	Yes	Yes	Yes	NA	Yes	No	Yes	No	No	No	No	Yes	Negative	NA
FI04813	MANANJARY	AMBOHIMIARINA II	MNJ_SCS1	Spot-check	36	Female	No	No education	Yes	Yes	Yes	No	No	Yes	No	No	Yes	No	No	No	Yes	Negative	NA
FI04814	MANANJARY	AMBOHIMIARINA II	MNJ_SCS1	Spot-check	13	Female	Yes	Primary	Yes	Yes	Yes	No	No	No	No	No	No	No	No	No	No	Negative	NA
FI04815	MANANJARY	AMBOHIMIARINA II	MNJ_SCS1	Spot-check	7	Female	No	No education	Yes	Yes	Yes	No	No	No	No	No	No	No	No	No	No	Negative	NA
FI04816	MANANJARY	AMBOHIMIARINA II	MNJ_SCS1	Spot-check	35	Female	Yes	Secondary or higher	Yes	Yes	Yes	Yes	Yes	Yes	No	No	Yes	No	No	No	Yes	Negative	NA
FI04817	MANANJARY	AMBOHIMIARINA II	MNJ_SCS1	Spot-check	29	Male	Yes	Secondary or higher	Yes	Yes	Yes	Yes	NA	Yes	No	Yes	Yes	No	No	No	Yes	Negative	NA
FI04818	MANANJARY	AMBOHIMIARINA II	MNJ_SCS1	Spot-check	18	Male	Yes	Secondary or higher	Yes	Yes	Yes	Yes	NA	Yes	No	No	Yes	No	No	No	Yes	Negative	NA
FI04819	MANANJARY	AMBOHIMIARINA II	MNJ_SCS1	Spot-check	45	Male	Yes	Primary	Yes	Yes	Yes	Yes	Yes	Yes	No	No	Yes	No	No	No	Yes	Negative	NA
FI04820	MANANJARY	AMBOHIMIARINA II	MNJ_SCS1	Spot-check	36	Male	No	No education	Yes	Yes	Yes	Yes	Yes	Yes	No	No	Yes	No	No	No	Yes	Negative	NA
FI04821	MANANJARY	AMBOHIMIARINA II	MNJ_SCS1	Spot-check	15	Male	Yes	Secondary or higher	Yes	Yes	Yes	NA	Yes	Yes	No	No	Yes	No	No	No	Yes	Negative	NA
FI04822	MANANJARY	AMBOHIMIARINA II	MNJ_SCS1	Spot-check	23	Female	Yes	Primary	Yes	Yes	Yes	Yes	Yes	Yes	No	No	Yes	No	No	No	Yes	Negative	NA
FI04823	MANANJARY	AMBOHIMIARINA II	MNJ_SCS1	Spot-check	40	Female	Yes	Secondary or higher	Yes	Yes	Yes	No	No	Yes	No	No	Yes	No	No	No	Yes	Negative	NA
FI04824	MANANJARY	AMBOHIMIARINA II	MNJ_SCS1	Spot-check	25	Male	Yes	Primary	Yes	Yes	Yes	Yes	Yes	Yes	No	No	Yes	No	No	No	Yes	Negative	NA
FI04825	MANANJARY	AMBOHIMIARINA II	MNJ_SCS1	Spot-check	34	Female	No	No education	Yes	Yes	Yes	Yes	Yes	Yes	No	No	Yes	No	No	No	Yes	Negative	NA
FI04826	MANANJARY	AMBOHIMIARINA II	MNJ_SCS1	Spot-check	8	Female	Yes	Primary	Yes	Yes	Yes	Yes	Yes	No	No	No	No	No	No	No	No	Negative	NA
FI04827	MANANJARY	AMBOHIMIARINA II	MNJ_SCS1	Spot-check	16	Female	Yes	Primary	Yes	Yes	Yes	Yes	Yes	Yes	No	No	Yes	No	No	No	Yes	Negative	NA
FI04828	MANANJARY	AMBOHIMIARINA II	MNJ_SCS1	Spot-check	18	Male	Yes	Secondary or higher	Yes	Yes	Yes	Yes	Yes	Yes	No	No	Yes	No	No	No	Yes	Negative	NA
FI04829	MANANJARY	AMBOHIMIARINA II	MNJ_SCS1	Spot-check	18	Female	Yes	Secondary or higher	Yes	Yes	Yes	Yes	Yes	Yes	No	No	Yes	No	No	No	Yes	Negative	NA
FI04830	MANANJARY	AMBOHIMIARINA II	MNJ_SCS1	Spot-check	51	Female	Yes	Primary	Yes	Yes	Yes	Yes	Yes	No	No	No	No	No	No	No	No	Negative	NA
FI04831	MANANJARY	AMBOHIMIARINA II	MNJ_SCS1	Spot-check	11	Female	Yes	Primary	Yes	Yes	Yes	Yes	Yes	No	No	No	No	No	No	No	No	Negative	NA
FI04832	MANANJARY	AMBOHIMIARINA II	MNJ_SCS1	Spot-check	12	Female	Yes	Primary	Yes	Yes	Yes	Yes	Yes	No	No	No	No	No	No	No	No	Negative	NA
FI04833	MANANJARY	AMBOHIMIARINA II	MNJ_SCS1	Spot-check	44	Female	No	No education	Yes	Yes	Yes	Yes	Yes	No	No	No	No	No	No	No	No	Negative	NA
FI04834	MANANJARY	AMBOHIMIARINA II	MNJ_SCS1	Spot-check	14	Female	No	No education	Yes	Yes	Yes	No	No	No	No	No	No	No	No	No	No	Negative	NA
FI04835	MANANJARY	AMBOHIMIARINA II	MNJ_SCS1	Spot-check	34	Male	Yes	Primary	Yes	Yes	Yes	Yes	Yes	No	No	No	No	No	No	No	No	Negative	NA
FI04836	MANANJARY	AMBOHIMIARINA II	MNJ_SCS1	Spot-check	18	Female	Yes	Primary	Yes	No	No	Yes	Yes	No	No	No	No	No	No	No	No	Negative	NA
FI04837	MANANJARY	AMBOHIMIARINA II	MNJ_SCS1	Spot-check	25	Female	Yes	Primary	Yes	Yes	Yes	Yes	No	Yes	No	No	Yes	No	No	No	Yes	Negative	NA
FI04838	MANANJARY	AMBOHIMIARINA II	MNJ_SCS1	Spot-check	25	Female	Yes	Secondary or higher	Yes	Yes	Yes	Yes	Yes	Yes	No	No	Yes	No	No	No	Yes	Negative	NA
FI04839	MANANJARY	AMBOHIMIARINA II	MNJ_SCS1	Spot-check	30	Female	Yes	Secondary or higher	Yes	Yes	Yes	Yes	Yes	Yes	No	No	Yes	No	No	No	Yes	Negative	NA
FI04840	MANANJARY	AMBOHIMIARINA II	MNJ_SCS1	Spot-check	48	Female	Yes	Secondary or higher	Yes	Yes	Yes	Yes	Yes	Yes	No	No	Yes	No	No	No	Yes	Negative	NA
FI04841	MANANJARY	AMBOHIMIARINA II	MNJ_SCS1	Spot-check	42	Male	Yes	Secondary or higher	Yes	Yes	Yes	Yes	Yes	Yes	No	Yes	Yes	No	No	No	Yes	Negative	NA
FI04842	MANANJARY	AMBOHIMIARINA II	MNJ_SCS1	Spot-check	49	Male	Yes	Secondary or higher	Yes	Yes	Yes	Yes	Yes	Yes	No	No	Yes	No	No	No	Yes	Negative	NA
FI04843	MANANJARY	AMBOHIMIARINA II	MNJ_SCS1	Spot-check	6	Female	Yes	Primary	Yes	Yes	Yes	Yes	Yes	No	No	No	No	No	No	No	No	Negative	NA
FI04844	MANANJARY	AMBOHIMIARINA II	MNJ_SCS1	Spot-check	22	Female	Yes	Secondary or higher	Yes	Yes	Yes	Yes	Yes	Yes	No	No	Yes	No	No	No	Yes	Negative	NA
FI04845	MANANJARY	AMBOHIMIARINA II	MNJ_SCS1	Spot-check	48	Female	Yes	Primary	Yes	Yes	Yes	Yes	Yes	Yes	No	No	Yes	No	No	No	Yes	Negative	NA
FI04846	MANANJARY	AMBOHIMIARINA II	MNJ_SCS1	Spot-check	5	Female	Yes	Primary	Yes	Yes	Yes	No	No	No	No	No	No	No	No	No	No	Negative	NA
FI04847	MANANJARY	AMBOHIMIARINA II	MNJ_SCS1	Spot-check	10	Female	Yes	Primary	Yes	Yes	Yes	NA	NA	NA	NA	NA	NA	NA	NA	NA	NA	Negative	NA
FI04848	MANANJARY	AMBOHIMIARINA II	MNJ_SCS1	Spot-check	21	Female	Yes	Primary	Yes	Yes	Yes	Yes	Yes	No	No	No	No	No	No	No	No	Negative	NA
FI04849	MANANJARY	AMBOHIMIARINA II	MNJ_SCS1	Spot-check	24	Female	Yes	Primary	Yes	Yes	Yes	Yes	Yes	Yes	Yes	Yes	No	No	Yes	No	Yes	Negative	NA
FI04850	MANANJARY	AMBOHIMIARINA II	MNJ_SCS1	Spot-check	6	Male	Yes	Primary	Yes	Yes	Yes	Yes	Yes	No	No	No	No	No	No	No	No	Negative	NA
FI04851	MANANJARY	AMBOHIMIARINA II	MNJ_SCS1	Spot-check	50	Male	Yes	Primary	Yes	Yes	Yes	No	Yes	Yes	No	Yes	Yes	No	No	No	Yes	Negative	NA
FI04852	MANANJARY	AMBOHIMIARINA II	MNJ_SCS1	Spot-check	28	Male	Yes	Primary	Yes	Yes	Yes	Yes	Yes	Yes	No	Yes	No	No	No	No	Yes	Negative	NA
FI04853	MANANJARY	AMBOHIMIARINA II	MNJ_SCS1	Spot-check	53	Female	Yes	Primary	Yes	Yes	Yes	Yes	Yes	Yes	No	Yes	Yes	No	No	No	Yes	Negative	NA
FI04854	MANANJARY	AMBOHIMIARINA II	MNJ_SCS1	Spot-check	9	Female	Yes	Primary	Yes	Yes	Yes	Yes	Yes	No	No	No	No	No	No	No	No	Negative	NA
FI04855	MANANJARY	AMBOHIMIARINA II	MNJ_SCS1	Spot-check	56	Female	Yes	Secondary or higher	Yes	Yes	Yes	Yes	Yes	Yes	No	Yes	Yes	Yes	No	No	Yes	Negative	NA
FI04856	MANANJARY	AMBOHIMIARINA II	MNJ_SCS1	Spot-check	55	Female	Yes	Primary	Yes	Yes	Yes	No	NA	Yes	Yes	No	No	No	No	No	Yes	Negative	NA
FI04857	MANANJARY	AMBOHIMIARINA II	MNJ_SCS1	Spot-check	12	Female	Yes	Primary	Yes	Yes	Yes	NA	NA	Yes	Yes	No	No	No	No	No	Yes	Negative	NA
FI04858	MANANJARY	AMBOHIMIARINA II	MNJ_SCS1	Spot-check	7	Female	Yes	Primary	Yes	Yes	Yes	No	No	Yes	Yes	No	No	No	No	No	Yes	Negative	NA
FI04859	MANANJARY	AMBOHIMIARINA II	MNJ_SCS1	Spot-check	6	Male	Yes	Primary	Yes	Yes	Yes	NA	NA	No	No	No	No	No	No	No	No	Negative	NA
FI04860	MANANJARY	AMBOHIMIARINA II	MNJ_SCS1	Spot-check	35	Male	Yes	Primary	Yes	Yes	Yes	NA	NA	Yes	Yes	No	No	No	No	No	Yes	Negative	NA
FI04861	MANANJARY	AMBOHIMIARINA II	MNJ_SCS1	Spot-check	45	Female	Yes	Primary	Yes	Yes	Yes	Yes	Yes	No	No	No	No	No	No	No	No	Negative	NA
FI04862	MANANJARY	AMBOHIMIARINA II	MNJ_SCS1	Spot-check	37	Female	Yes	Primary	Yes	Yes	Yes	Yes	Yes	No	No	No	No	No	No	No	No	Negative	NA
FI04863	MANANJARY	AMBOHIMIARINA II	MNJ_SCS1	Spot-check	61	Male	Yes	Primary	Yes	Yes	Yes	Yes	Yes	Yes	No	Yes	Yes	No	No	No	Yes	Negative	NA
FI04864	MANANJARY	AMBOHIMIARINA II	MNJ_SCS1	Spot-check	20	Female	Yes	Primary	Yes	Yes	Yes	Yes	Yes	Yes	No	Yes	Yes	No	No	No	Yes	Negative	NA
FI04865	MANANJARY	AMBOHIMIARINA II	MNJ_SCS1	Spot-check	46	Female	Yes	Primary	Yes	Yes	Yes	Yes	Yes	Yes	No	No	Yes	No	No	No	Yes	Negative	NA
FI04866	MANANJARY	AMBOHIMIARINA II	MNJ_SCS1	Spot-check	23	Female	Yes	Primary	Yes	Yes	Yes	Yes	Yes	No	No	No	No	No	No	No	No	Negative	NA
FI04867	MANANJARY	AMBOHIMIARINA II	MNJ_SCS1	Spot-check	22	Female	Yes	Primary	Yes	Yes	Yes	Yes	Yes	No	No	No	No	No	No	No	No	Negative	NA
FI04868	MANANJARY	AMBOHIMIARINA II	MNJ_SCS1	Spot-check	40	Female	Yes	Primary	Yes	Yes	Yes	Yes	Yes	No	No	No	No	No	No	No	No	Negative	NA
FI04869	MANANJARY	AMBOHIMIARINA II	MNJ_SCS1	Spot-check	20	Female	Yes	Primary	Yes	Yes	Yes	Yes	Yes	No	No	No	No	No	No	No	No	Negative	NA
FI04870	MANANJARY	AMBOHIMIARINA II	MNJ_SCS1	Spot-check	29	Female	Yes	Primary	Yes	Yes	Yes	Yes	Yes	Yes	No	No	Yes	No	No	No	Yes	Negative	NA
FI04871	MANANJARY	AMBOHIMIARINA II	MNJ_SCS1	Spot-check	32	Male	Yes	Primary	Yes	Yes	Yes	No	No	Yes	Yes	Yes	No	No	No	No	Yes	Negative	NA
FI04872	MANANJARY	AMBOHIMIARINA II	MNJ_SCS1	Spot-check	11	Male	Yes	Primary	Yes	Yes	Yes	NA	NA	No	No	No	No	No	No	No	No	Negative	NA
FI04873	MANANJARY	AMBOHIMIARINA II	MNJ_SCS1	Spot-check	39	Male	No	No education	Yes	Yes	Yes	No	No	Yes	Yes	No	No	Yes	No	No	Yes	Negative	NA
FI04874	MANANJARY	AMBOHIMIARINA II	MNJ_SCS1	Spot-check	10	Male	No	No education	Yes	Yes	Yes	Yes	No	No	No	No	No	No	No	No	No	Negative	NA
FI04875	MANANJARY	AMBOHIMIARINA II	MNJ_SCS1	Spot-check	35	Female	No	No education	Yes	Yes	Yes	Yes	Yes	Yes	Yes	Yes	No	No	No	No	Yes	Negative	NA
FI04876	MANANJARY	AMBOHIMIARINA II	MNJ_SCS1	Spot-check	15	Female	Yes	Secondary or higher	Yes	Yes	Yes	Yes	Yes	Yes	Yes	Yes	No	No	No	No	Yes	Negative	NA
FI04877	MANANJARY	AMBOHIMIARINA II	MNJ_SCS1	Spot-check	13	Female	Yes	Primary	Yes	Yes	Yes	Yes	Yes	Yes	No	Yes	No	No	No	No	Yes	Negative	NA
FI04878	MANANJARY	AMBOHIMIARINA II	MNJ_SCS1	Spot-check	9	Female	Yes	Primary	Yes	Yes	Yes	Yes	Yes	Yes	No	Yes	No	No	No	No	Yes	Negative	NA
FI04879	MANANJARY	AMBOHIMIARINA II	MNJ_SCS1	Spot-check	9	Male	Yes	Primary	Yes	Yes	Yes	Yes	Yes	Yes	No	Yes	No	No	No	No	Yes	Negative	NA
FI04880	MANANJARY	AMBOHIMIARINA II	MNJ_SCS1	Spot-check	5	Male	Yes	Primary	Yes	Yes	Yes	Yes	Yes	Yes	Yes	Yes	No	Yes	No	No	Yes	Negative	NA
FI04881	MANANJARY	AMBOHIMIARINA II	MNJ_SCS1	Spot-check	30	Female	Yes	Primary	Yes	Yes	Yes	Yes	Yes	Yes	Yes	Yes	No	No	No	No	Yes	Negative	NA
FI04882	MANANJARY	AMBOHIMIARINA II	MNJ_SCS1	Spot-check	12	Female	Yes	Primary	Yes	Yes	Yes	Yes	Yes	Yes	Yes	Yes	No	No	No	No	Yes	Negative	NA
FI04883	MANANJARY	AMBOHIMIARINA II	MNJ_SCS1	Spot-check	6	Female	Yes	Primary	Yes	Yes	Yes	Yes	Yes	No	No	No	No	No	No	No	No	Negative	NA
FI04884	MANANJARY	AMBOHIMIARINA II	MNJ_SCS1	Spot-check	23	Male	Yes	Primary	Yes	Yes	Yes	Yes	NA	Yes	No	No	Yes	No	No	No	Yes	Negative	NA
FI04885	MANANJARY	AMBOHIMIARINA II	MNJ_SCS1	Spot-check	35	Male	Yes	Primary	Yes	Yes	Yes	Yes	Yes	Yes	Yes	Yes	No	No	No	No	Yes	Negative	NA
FI04886	MANANJARY	AMBOHIMIARINA II	MNJ_SCS1	Spot-check	23	Male	No	No education	Yes	Yes	Yes	Yes	Yes	No	No	No	No	No	No	No	No	Negative	NA
FI04887	MANANJARY	AMBOHIMIARINA II	MNJ_SCS1	Spot-check	21	Male	No	No education	Yes	Yes	Yes	Yes	Yes	Yes	Yes	Yes	No	No	No	No	Yes	Negative	NA
FI04888	MANANJARY	AMBOHIMIARINA II	MNJ_SCS1	Spot-check	20	Male	No	No education	Yes	Yes	Yes	Yes	Yes	Yes	No	No	No	Yes	No	No	Yes	Negative	NA
FI04889	MANANJARY	AMBOHIMIARINA II	MNJ_SCS1	Spot-check	18	Male	Yes	Primary	Yes	Yes	Yes	Yes	Yes	Yes	Yes	Yes	No	No	No	No	Yes	Negative	NA
FI04890	MANANJARY	AMBOHIMIARINA II	MNJ_SCS1	Spot-check	21	Male	Yes	Primary	Yes	Yes	Yes	Yes	Yes	Yes	Yes	Yes	No	No	No	No	Yes	Negative	NA
FI04891	MANANJARY	AMBOHIMIARINA II	MNJ_SCS1	Spot-check	27	Male	Yes	Secondary or higher	Yes	Yes	Yes	NA	Yes	No	No	No	No	No	No	No	No	Negative	NA
FI04892	MANANJARY	AMBOHIMIARINA II	MNJ_SCS1	Spot-check	48	Female	Yes	Primary	No	No	No	NA	Yes	No	No	No	No	No	No	No	No	Negative	NA
FI04893	MANANJARY	AMBOHIMIARINA II	MNJ_SCS1	Spot-check	20	Female	Yes	Primary	Yes	Yes	Yes	Yes	Yes	Yes	Yes	Yes	No	No	No	No	Yes	Negative	NA
FI04894	MANANJARY	AMBOHIMIARINA II	MNJ_SCS1	Spot-check	28	Female	Yes	Primary	Yes	Yes	Yes	Yes	Yes	Yes	Yes	Yes	No	No	No	No	Yes	Negative	NA
FI04895	MANANJARY	AMBOHIMIARINA II	MNJ_SCS1	Spot-check	7	Male	Yes	Primary	Yes	Yes	Yes	Yes	Yes	No	No	No	No	No	No	No	No	Negative	NA
FI04896	MANANJARY	AMBOHIMIARINA II	MNJ_SCS1	Spot-check	19	Female	Yes	Secondary or higher	Yes	Yes	Yes	Yes	Yes	Yes	Yes	Yes	No	No	No	No	Yes	Negative	NA
FI04897	MANANJARY	AMBOHIMIARINA II	MNJ_SCS1	Spot-check	27	Female	Yes	Primary	Yes	Yes	Yes	Yes	Yes	Yes	Yes	Yes	No	No	No	No	Yes	Negative	NA
FI04898	MANANJARY	AMBOHIMIARINA II	MNJ_SCS1	Spot-check	18	Male	Yes	Primary	Yes	Yes	Yes	Yes	Yes	Yes	Yes	Yes	No	No	No	No	Yes	Negative	NA
FI04899	MANANJARY	AMBOHIMIARINA II	MNJ_SCS1	Spot-check	60	Male	No	No education	Yes	Yes	Yes	Yes	Yes	Yes	Yes	Yes	No	No	No	No	Yes	Negative	NA
FI04900	MANANJARY	AMBOHIMIARINA II	MNJ_SCS1	Spot-check	62	Male	Yes	Primary	Yes	Yes	Yes	Yes	Yes	Yes	No	No	Yes	No	No	No	Yes	Negative	NA
FI04901	MANANJARY	AMBOHIMIARINA II	MNJ_SCS1	Spot-check	18	Male	Yes	Primary	Yes	Yes	Yes	Yes	Yes	Yes	No	No	Yes	No	No	No	Yes	Negative	NA
FI04902	MANANJARY	AMBOHIMIARINA II	MNJ_SCS1	Spot-check	31	Male	Yes	Secondary or higher	Yes	Yes	Yes	Yes	Yes	Yes	No	No	Yes	No	No	No	Yes	Negative	NA
FI04903	MANANJARY	AMBOHIMIARINA II	MNJ_SCS1	Spot-check	27	Male	Yes	Secondary or higher	Yes	Yes	Yes	Yes	Yes	Yes	No	No	Yes	No	No	No	Yes	Negative	NA
FI04904	MANANJARY	AMBOHIMIARINA II	MNJ_SCS1	Spot-check	35	Female	Yes	Primary	Yes	Yes	Yes	Yes	Yes	No	No	No	No	No	No	No	No	Negative	NA
FI04905	MANANJARY	AMBOHIMIARINA II	MNJ_SCS1	Spot-check	30	Female	Yes	Primary	No	No	No	No	No	No	No	No	No	No	No	No	No	Negative	NA
FI04906	MANANJARY	AMBOHIMIARINA II	MNJ_SCS1	Spot-check	53	Female	Yes	Primary	Yes	Yes	Yes	No	No	Yes	No	Yes	No	No	No	No	Yes	Negative	NA
FI04907	MANANJARY	AMBOHIMIARINA II	MNJ_SCS1	Spot-check	25	Male	Yes	Primary	No	No	No	Yes	Yes	Yes	Yes	Yes	Yes	No	No	No	Yes	Negative	NA
FI04908	MANANJARY	AMBOHIMIARINA II	MNJ_SCS1	Spot-check	42	Male	Yes	Primary	Yes	Yes	Yes	Yes	Yes	Yes	No	Yes	No	No	No	No	Yes	Negative	NA
FI04909	MANANJARY	AMBOHIMIARINA II	MNJ_SCS1	Spot-check	19	Female	No	No education	Yes	Yes	Yes	Yes	Yes	No	No	No	No	No	No	No	No	Negative	NA
FI04910	MANANJARY	AMBOHIMIARINA II	MNJ_SCS1	Spot-check	19	Female	Yes	Primary	Yes	Yes	Yes	Yes	Yes	Yes	No	No	Yes	No	No	No	Yes	Negative	NA
FI04911	MANANJARY	AMBOHIMIARINA II	MNJ_SCS1	Spot-check	35	Female	No	No education	Yes	Yes	Yes	Yes	Yes	Yes	Yes	Yes	Yes	No	No	No	Yes	Negative	NA
FI04912	MANANJARY	AMBOHIMIARINA II	MNJ_SCS1	Spot-check	33	Female	Yes	Primary	Yes	Yes	Yes	No	No	Yes	Yes	Yes	No	Yes	No	No	Yes	Negative	NA
FI04913	MANANJARY	AMBOHIMIARINA II	MNJ_SCS1	Spot-check	54	Female	Yes	Primary	Yes	Yes	Yes	No	No	Yes	Yes	Yes	No	Yes	No	No	Yes	Negative	NA
FI04914	MANANJARY	AMBOHIMIARINA II	MNJ_SCS1	Spot-check	36	Male	Yes	Primary	Yes	Yes	Yes	No	No	Yes	Yes	Yes	No	Yes	No	No	Yes	Positive	Negative
FI04915	MANANJARY	AMBOHIMIARINA II	MNJ_SCS1	Spot-check	56	Male	Yes	Primary	Yes	Yes	Yes	Yes	No	Yes	Yes	Yes	Yes	No	No	No	Yes	Negative	NA
FI04916	MANANJARY	AMBOHIMIARINA II	MNJ_SCS1	Spot-check	40	Female	Yes	Primary	Yes	Yes	Yes	Yes	Yes	Yes	Yes	Yes	No	No	No	No	Yes	Negative	NA
FI04917	MANANJARY	AMBOHIMIARINA II	MNJ_SCS1	Spot-check	16	Female	Yes	Primary	Yes	Yes	Yes	Yes	Yes	Yes	Yes	Yes	Yes	No	No	No	Yes	Negative	NA
FI04918	MANANJARY	AMBOHIMIARINA II	MNJ_SCS1	Spot-check	17	Female	Yes	Primary	Yes	Yes	Yes	Yes	Yes	Yes	Yes	No	No	No	No	No	Yes	Negative	NA
FI04919	MANANJARY	AMBOHIMIARINA II	MNJ_SCS1	Spot-check	11	Female	Yes	Primary	Yes	Yes	Yes	No	Yes	Yes	Yes	Yes	No	No	No	No	Yes	Negative	NA
FI04920	MANANJARY	AMBOHIMIARINA II	MNJ_SCS1	Spot-check	10	Female	Yes	Primary	Yes	Yes	Yes	Yes	Yes	No	No	No	No	No	No	No	No	Negative	NA
FI04921	MANANJARY	AMBOHIMIARINA II	MNJ_SCS1	Spot-check	9	Female	No	No education	Yes	Yes	Yes	Yes	Yes	No	No	No	No	No	No	No	No	Negative	NA
FI04922	MANANJARY	AMBOHIMIARINA II	MNJ_SCS1	Spot-check	67	Male	Yes	Primary	Yes	Yes	Yes	Yes	Yes	No	No	No	No	No	No	No	No	Negative	NA
FI04923	MANANJARY	AMBOHIMIARINA II	MNJ_SCS1	Spot-check	11	Female	Yes	Primary	Yes	Yes	Yes	Yes	Yes	No	No	No	No	No	No	No	No	Negative	NA
FI04924	MANANJARY	AMBOHIMIARINA II	MNJ_SCS1	Spot-check	62	Male	Yes	Primary	Yes	Yes	Yes	Yes	Yes	No	No	No	No	No	No	No	No	Negative	NA
FI04925	MANANJARY	AMBOHIMIARINA II	MNJ_SCS1	Spot-check	18	Female	No	No education	Yes	Yes	Yes	Yes	Yes	No	No	No	No	No	No	No	No	Negative	NA
FI04926	MANANJARY	AMBOHIMIARINA II	MNJ_SCS1	Spot-check	19	Female	No	No education	Yes	Yes	Yes	Yes	Yes	No	No	No	No	No	No	No	No	Negative	NA
FI04927	MANANJARY	AMBOHIMIARINA II	MNJ_SCS1	Spot-check	19	Female	No	No education	Yes	Yes	Yes	Yes	Yes	No	No	No	No	No	No	No	No	Negative	NA
FI04928	MANANJARY	AMBOHIMIARINA II	MNJ_SCS1	Spot-check	25	Female	Yes	Primary	Yes	Yes	Yes	Yes	Yes	Yes	No	No	Yes	No	No	No	No	Negative	NA
FI04929	MANANJARY	AMBOHIMIARINA II	MNJ_SCS1	Spot-check	7	Female	Yes	Primary	Yes	Yes	Yes	Yes	Yes	No	No	No	No	No	No	No	No	Negative	NA
FI04930	MANANJARY	AMBOHIMIARINA II	MNJ_SCS1	Spot-check	51	Male	Yes	Secondary or higher	Yes	Yes	Yes	Yes	Yes	Yes	No	No	Yes	Yes	No	No	NA	Negative	NA
FI04931	MANANJARY	AMBOHIMIARINA II	MNJ_SCS1	Spot-check	30	Female	Yes	Primary	Yes	Yes	Yes	Yes	Yes	Yes	No	No	Yes	Yes	No	No	NA	Negative	NA
FI04932	MANANJARY	AMBOHIMIARINA II	MNJ_SCS1	Spot-check	9	Female	Yes	Primary	Yes	Yes	Yes	No	Yes	No	No	No	No	No	No	No	No	Negative	NA
FI04933	MANANJARY	AMBOHIMIARINA II	MNJ_SCS1	Spot-check	12	Female	Yes	Primary	Yes	Yes	Yes	NA	Yes	No	No	No	No	No	No	No	No	Negative	NA
FI04934	MANANJARY	AMBOHIMIARINA II	MNJ_SCS1	Spot-check	20	Female	Yes	Primary	Yes	Yes	Yes	Yes	Yes	Yes	Yes	Yes	No	Yes	No	No	Yes	Negative	NA
FI04935	MANANJARY	AMBOHIMIARINA II	MNJ_SCS1	Spot-check	13	Male	Yes	Secondary or higher	Yes	Yes	Yes	Yes	Yes	Yes	Yes	No	Yes	Yes	No	No	Yes	Negative	NA
FI04936	MANANJARY	AMBOHIMIARINA II	MNJ_SCS1	Spot-check	11	Male	Yes	Primary	Yes	Yes	Yes	Yes	Yes	Yes	Yes	No	No	Yes	No	No	Yes	Negative	NA
FI04937	MANANJARY	AMBOHIMIARINA II	MNJ_SCS1	Spot-check	6	Female	Yes	Primary	Yes	Yes	Yes	Yes	Yes	No	No	No	No	No	No	No	No	Negative	NA
FI04938	MANANJARY	AMBOHIMIARINA II	MNJ_SCS1	Spot-check	20	Male	Yes	Primary	Yes	Yes	Yes	Yes	Yes	Yes	Yes	Yes	Yes	No	No	No	Yes	Negative	NA
FI04939	MANANJARY	AMBOHIMIARINA II	MNJ_SCS1	Spot-check	18	Male	Yes	Primary	Yes	Yes	Yes	No	No	Yes	Yes	Yes	No	Yes	No	No	Yes	Negative	NA
FI04940	MANANJARY	AMBOHIMIARINA II	MNJ_SCS1	Spot-check	28	Female	No	No education	Yes	Yes	Yes	Yes	Yes	No	No	No	No	No	No	No	No	Negative	NA
FI04941	MANANJARY	AMBOHIMIARINA II	MNJ_SCS1	Spot-check	9	Female	No	No education	Yes	Yes	Yes	Yes	Yes	No	No	No	No	No	No	No	No	Negative	NA
FI04942	MANANJARY	AMBOHIMIARINA II	MNJ_SCS1	Spot-check	6	Male	No	No education	Yes	NA	Yes	Yes	Yes	No	No	No	No	No	No	No	No	Negative	NA
FI04943	MANANJARY	AMBOHIMIARINA II	MNJ_SCS1	Spot-check	26	Male	Yes	Primary	Yes	Yes	Yes	Yes	Yes	Yes	Yes	Yes	Yes	No	No	No	Yes	Negative	NA
FI04944	MANANJARY	AMBOHIMIARINA II	MNJ_SCS1	Spot-check	9	Female	Yes	Primary	Yes	Yes	Yes	Yes	Yes	Yes	Yes	Yes	Yes	No	No	No	Yes	Negative	NA
FI04945	MANANJARY	AMBOHIMIARINA II	MNJ_SCS1	Spot-check	22	Female	Yes	Primary	Yes	Yes	Yes	Yes	Yes	Yes	Yes	Yes	Yes	No	No	No	Yes	Negative	NA
FI04946	MANANJARY	AMBOHIMIARINA II	MNJ_SCS1	Spot-check	31	Male	No	No education	Yes	Yes	Yes	Yes	Yes	Yes	No	Yes	No	No	No	No	Yes	Negative	NA
FI04947	MANANJARY	AMBOHIMIARINA II	MNJ_SCS1	Spot-check	10	Male	Yes	Primary	Yes	Yes	Yes	Yes	Yes	Yes	No	Yes	No	No	No	No	Yes	Negative	NA
FI04948	MANANJARY	AMBOHIMIARINA II	MNJ_SCS1	Spot-check	5	Male	No	No education	Yes	Yes	Yes	Yes	Yes	No	No	No	No	No	No	No	No	Negative	NA
FI04949	MANANJARY	AMBOHIMIARINA II	MNJ_SCS1	Spot-check	18	Male	Yes	Primary	Yes	Yes	Yes	Yes	Yes	Yes	Yes	Yes	Yes	No	No	No	Yes	Negative	NA
FI04950	MANANJARY	AMBOHIMIARINA II	MNJ_SCS1	Spot-check	20	Male	Yes	Primary	Yes	Yes	Yes	Yes	Yes	Yes	Yes	Yes	No	No	No	No	Yes	Negative	NA
FI04951	MANANJARY	AMBOHIMIARINA II	MNJ_SCS1	Spot-check	48	Female	Yes	Primary	Yes	Yes	Yes	Yes	Yes	Yes	No	Yes	Yes	No	No	No	Yes	Negative	NA
FI04952	MANANJARY	AMBOHIMIARINA II	MNJ_SCS1	Spot-check	18	Male	Yes	Primary	Yes	Yes	Yes	No	No	Yes	Yes	No	No	No	No	No	Yes	Negative	NA
FI04953	MANANJARY	AMBOHIMIARINA II	MNJ_SCS1	Spot-check	42	Male	Yes	Primary	Yes	Yes	Yes	Yes	Yes	Yes	Yes	Yes	No	No	No	No	Yes	Negative	NA
FI04954	MANANJARY	AMBOHIMIARINA II	MNJ_SCS1	Spot-check	40	Male	Yes	Secondary or higher	Yes	Yes	Yes	Yes	Yes	Yes	Yes	Yes	Yes	No	No	Yes	Yes	Negative	NA
FI04955	MANANJARY	AMBOHIMIARINA II	MNJ_SCS1	Spot-check	15	Male	Yes	Primary	Yes	Yes	Yes	No	No	No	No	No	No	No	No	No	No	Negative	NA
FI04956	MANANJARY	AMBOHIMIARINA II	MNJ_SCS1	Spot-check	30	Male	Yes	Primary	Yes	Yes	Yes	Yes	Yes	Yes	No	Yes	No	No	No	No	No	Negative	NA
FI04957	MANANJARY	AMBOHIMIARINA II	MNJ_SCS1	Spot-check	27	Female	Yes	Primary	Yes	Yes	Yes	Yes	Yes	Yes	No	Yes	No	No	No	No	Yes	Negative	NA
FI04958	MANANJARY	AMBOHIMIARINA II	MNJ_SCS1	Spot-check	8	Female	Yes	Primary	Yes	Yes	Yes	Yes	Yes	No	No	No	No	No	No	No	No	Negative	NA
FI04959	MANANJARY	AMBOHIMIARINA II	MNJ_SCS1	Spot-check	55	Female	No	No education	Yes	Yes	Yes	Yes	Yes	Yes	Yes	Yes	No	No	No	No	Yes	Negative	NA
FI04960	MANANJARY	AMBOHIMIARINA II	MNJ_SCS1	Spot-check	21	Female	No	No education	Yes	Yes	Yes	Yes	Yes	Yes	Yes	Yes	No	No	No	No	Yes	Negative	NA
FI04961	MANANJARY	AMBOHIMIARINA II	MNJ_SCS1	Spot-check	18	Female	No	No education	Yes	Yes	Yes	Yes	Yes	Yes	No	Yes	Yes	No	No	No	Yes	Negative	NA
FI04962	MANANJARY	AMBOHIMIARINA II	MNJ_SCS1	Spot-check	35	Female	No	No education	Yes	Yes	Yes	Yes	Yes	Yes	No	Yes	Yes	No	No	No	Yes	Negative	NA
FI04963	MANANJARY	AMBOHIMIARINA II	MNJ_SCS1	Spot-check	6	Female	Yes	Primary	Yes	Yes	Yes	Yes	Yes	Yes	No	Yes	Yes	No	No	No	Yes	Negative	NA
FI04964	MANANJARY	AMBOHIMIARINA II	MNJ_SCS1	Spot-check	36	Female	No	No education	Yes	Yes	Yes	No	No	Yes	Yes	No	No	No	No	No	Yes	Negative	NA
FI04965	MANANJARY	AMBOHIMIARINA II	MNJ_SCS1	Spot-check	25	Male	No	No education	Yes	Yes	Yes	Yes	Yes	Yes	Yes	Yes	Yes	No	No	No	Yes	Negative	NA
FI04966	MANANJARY	AMBOHIMIARINA II	MNJ_SCS1	Spot-check	19	Female	No	No education	Yes	Yes	Yes	No	No	No	No	No	No	No	No	No	No	Negative	NA
FI04967	MANANJARY	AMBOHIMIARINA II	MNJ_SCS1	Spot-check	42	Female	No	No education	Yes	Yes	Yes	Yes	Yes	Yes	Yes	Yes	Yes	No	No	No	Yes	Negative	NA
FI04968	MANANJARY	AMBOHIMIARINA II	MNJ_SCS1	Spot-check	43	Male	Yes	Primary	Yes	Yes	Yes	No	No	Yes	Yes	Yes	Yes	No	No	No	Yes	Negative	NA
FI04969	MANANJARY	AMBOHIMIARINA II	MNJ_SCS1	Spot-check	15	Female	Yes	Primary	Yes	Yes	Yes	Yes	Yes	Yes	Yes	Yes	No	No	No	No	Yes	Negative	NA
FI04970	MANANJARY	AMBOHIMIARINA II	MNJ_SCS1	Spot-check	49	Male	Yes	Primary	Yes	Yes	Yes	Yes	Yes	Yes	No	No	Yes	No	No	No	Yes	Negative	NA
FI04971	MANANJARY	AMBOHIMIARINA II	MNJ_SCS1	Spot-check	43	Female	No	No education	Yes	Yes	Yes	No	Yes	No	No	No	No	No	No	No	No	Negative	NA
FI04972	MANANJARY	AMBOHIMIARINA II	MNJ_SCS1	Spot-check	14	Male	Yes	Primary	Yes	Yes	Yes	No	Yes	No	No	No	No	No	No	No	No	Negative	NA
FI04973	MANANJARY	AMBOHIMIARINA II	MNJ_SCS1	Spot-check	17	Male	Yes	Primary	Yes	Yes	Yes	No	Yes	Yes	No	No	Yes	No	No	No	Yes	Negative	NA
FI04974	MANANJARY	AMBOHIMIARINA II	MNJ_SCS1	Spot-check	17	Male	Yes	Primary	Yes	Yes	Yes	No	Yes	No	No	No	No	No	No	No	No	Negative	NA
FI04975	MANANJARY	AMBOHIMIARINA II	MNJ_SCS1	Spot-check	10	Male	Yes	Primary	Yes	Yes	Yes	Yes	Yes	Yes	No	Yes	No	No	No	No	Yes	Negative	NA
FI04976	MANANJARY	AMBOHIMIARINA II	MNJ_SCS1	Spot-check	27	Female	Yes	Primary	Yes	Yes	Yes	Yes	Yes	Yes	Yes	Yes	Yes	No	No	No	Yes	Negative	NA
FI04977	MANANJARY	AMBOHIMIARINA II	MNJ_SCS1	Spot-check	58	Female	Yes	Primary	Yes	Yes	Yes	Yes	Yes	Yes	Yes	Yes	Yes	No	No	No	Yes	Negative	NA
FI04978	MANANJARY	AMBOHIMIARINA II	MNJ_SCS1	Spot-check	52	Female	Yes	Primary	Yes	Yes	Yes	Yes	Yes	Yes	Yes	Yes	Yes	No	No	No	Yes	Positive	Negative
FI04979	MANANJARY	AMBOHIMIARINA II	MNJ_SCS1	Spot-check	25	Female	Yes	Primary	Yes	Yes	Yes	Yes	Yes	NA	NA	NA	NA	NA	NA	NA	NA	Negative	NA
FI04980	MANANJARY	AMBOHIMIARINA II	MNJ_SCS1	Spot-check	26	Female	Yes	Primary	Yes	Yes	Yes	Yes	Yes	Yes	No	Yes	Yes	No	No	No	Yes	Negative	NA
FI04981	MANANJARY	AMBOHIMIARINA II	MNJ_SCS1	Spot-check	36	Female	Yes	Primary	Yes	Yes	Yes	Yes	Yes	Yes	No	No	Yes	No	No	No	Yes	Negative	NA
FI04982	MANANJARY	AMBOHIMIARINA II	MNJ_SCS1	Spot-check	12	Male	Yes	Primary	Yes	Yes	Yes	Yes	Yes	No	No	No	No	No	No	No	No	Negative	NA
FI04983	MANANJARY	AMBOHIMIARINA II	MNJ_SCS1	Spot-check	20	Female	Yes	Primary	Yes	Yes	Yes	Yes	Yes	Yes	No	No	Yes	No	No	No	Yes	Negative	NA
FI04984	MANANJARY	AMBOHIMIARINA II	MNJ_SCS1	Spot-check	27	Female	Yes	Primary	Yes	Yes	Yes	NA	Yes	Yes	No	No	Yes	No	No	No	Yes	Negative	NA
FI04985	MANANJARY	AMBOHIMIARINA II	MNJ_SCS1	Spot-check	29	Male	No	No education	Yes	Yes	Yes	NA	Yes	Yes	No	Yes	No	Yes	No	No	No	Negative	NA
FI04986	MANANJARY	AMBOHIMIARINA II	MNJ_SCS1	Spot-check	29	Male	Yes	Primary	Yes	Yes	Yes	Yes	Yes	Yes	No	No	Yes	No	No	No	Yes	Negative	NA
FI04987	MANANJARY	AMBOHIMIARINA II	MNJ_SCS1	Spot-check	12	Female	Yes	Primary	Yes	Yes	Yes	Yes	Yes	NA	NA	NA	NA	NA	NA	NA	NA	Negative	NA
FI04988	MANANJARY	AMBOHIMIARINA II	MNJ_SCS1	Spot-check	13	Female	Yes	Primary	Yes	Yes	Yes	Yes	Yes	No	No	No	No	No	No	No	No	Negative	NA
FI04989	MANANJARY	AMBOHIMIARINA II	MNJ_SCS1	Spot-check	13	Female	Yes	Primary	Yes	Yes	Yes	Yes	Yes	No	No	No	No	No	No	No	No	Negative	NA
FI04990	MANANJARY	AMBOHIMIARINA II	MNJ_SCS1	Spot-check	18	Female	Yes	Primary	Yes	Yes	Yes	Yes	Yes	Yes	No	Yes	Yes	No	No	No	Yes	Negative	NA
FI04991	MANANJARY	AMBOHIMIARINA II	MNJ_SCS1	Spot-check	18	Female	Yes	Primary	Yes	Yes	Yes	Yes	Yes	Yes	No	No	No	No	No	Yes	Yes	Negative	NA
FI04992	MANANJARY	AMBOHIMIARINA II	MNJ_SCS1	Spot-check	18	Female	Yes	Primary	Yes	Yes	Yes	Yes	Yes	No	No	No	No	No	No	No	No	Negative	NA
FI04993	MANANJARY	AMBOHIMIARINA II	MNJ_SCS1	Spot-check	25	Male	Yes	Secondary or higher	Yes	NA	No	Yes	Yes	Yes	No	No	Yes	No	No	No	NA	Negative	NA
FI04994	MANANJARY	AMBOHIMIARINA II	MNJ_SCS1	Spot-check	12	Male	Yes	Primary	Yes	Yes	Yes	No	Yes	No	No	No	No	No	No	No	No	Negative	NA
FI04995	MANANJARY	AMBOHIMIARINA II	MNJ_SCS1	Spot-check	11	Male	Yes	Primary	Yes	Yes	Yes	Yes	Yes	No	No	No	No	No	No	No	No	Negative	NA
FI04996	MANANJARY	AMBOHIMIARINA II	MNJ_SCS1	Spot-check	24	Male	Yes	Primary	Yes	Yes	Yes	Yes	Yes	Yes	No	Yes	Yes	No	No	No	Yes	Negative	NA
FI04997	MANANJARY	AMBOHIMIARINA II	MNJ_SCS1	Spot-check	22	Male	Yes	Secondary or higher	Yes	Yes	Yes	Yes	Yes	Yes	Yes	No	Yes	Yes	No	No	Yes	Negative	NA
FI04998	MANANJARY	AMBOHIMIARINA II	MNJ_SCS1	Spot-check	10	Male	Yes	Secondary or higher	Yes	Yes	No	NA	No	Yes	No	Yes	No	Yes	No	No	Yes	Negative	NA
FI04999	MANANJARY	AMBOHIMIARINA II	MNJ_SCS1	Spot-check	30	Male	No	No education	No	No	No	No	No	No	No	No	No	No	No	No	No	Negative	NA
FI05000	MANANJARY	AMBOHIMIARINA II	MNJ_SCS1	Spot-check	40	Male	No	No education	Yes	Yes	Yes	No	Yes	Yes	No	No	Yes	No	No	No	Yes	Negative	NA
FI05001	MANANJARY	AMBOHIMIARINA II	MNJ_SCS1	Spot-check	40	Male	Yes	Primary	Yes	Yes	Yes	Yes	Yes	No	No	No	No	No	No	No	No	Negative	NA
FI05002	MANANJARY	AMBOHIMIARINA II	MNJ_SCS1	Spot-check	28	Female	No	No education	Yes	Yes	Yes	No	Yes	Yes	No	No	Yes	No	No	No	Yes	Negative	NA
FI05003	MANANJARY	AMBOHIMIARINA II	MNJ_SCS1	Spot-check	11	Female	Yes	Primary	Yes	Yes	Yes	No	No	No	No	No	No	No	No	No	No	Negative	NA
FI05004	MANANJARY	AMBOHIMIARINA II	MNJ_SCS1	Spot-check	7	Male	Yes	Primary	Yes	Yes	Yes	No	Yes	No	No	No	No	No	No	No	No	Negative	NA
FI05005	MANANJARY	AMBOHIMIARINA II	MNJ_SCS1	Spot-check	5	Male	Yes	Primary	Yes	Yes	Yes	No	Yes	No	No	No	No	No	No	No	No	Negative	NA
FI05006	MANANJARY	AMBOHIMIARINA II	MNJ_SCS1	Spot-check	48	Male	Yes	Primary	Yes	Yes	Yes	No	Yes	Yes	No	No	Yes	No	No	No	Yes	Negative	NA
FI05007	MANANJARY	AMBOHIMIARINA II	MNJ_SCS1	Spot-check	20	Female	Yes	Primary	Yes	Yes	Yes	Yes	Yes	Yes	No	Yes	Yes	No	No	No	Yes	Positive	Negative
FI05008	MANANJARY	AMBOHIMIARINA II	MNJ_SCS1	Spot-check	40	Female	Yes	Primary	Yes	Yes	Yes	Yes	Yes	Yes	No	No	Yes	No	No	No	Yes	Negative	NA
FI05009	MANANJARY	AMBOHIMIARINA II	MNJ_SCS1	Spot-check	52	Female	Yes	Secondary or higher	Yes	Yes	Yes	Yes	Yes	Yes	No	No	Yes	No	No	No	Yes	Negative	NA
FI05010	MANANJARY	AMBOHIMIARINA II	MNJ_SCS1	Spot-check	52	Male	Yes	Primary	No	No	No	Yes	Yes	No	No	No	No	No	No	No	No	Negative	NA
FI05011	MANANJARY	AMBOHIMIARINA II	MNJ_SCS1	Spot-check	29	Male	Yes	Secondary or higher	Yes	Yes	Yes	No	No	Yes	No	No	Yes	No	No	No	Yes	Negative	NA
FI05012	MANANJARY	AMBOHIMIARINA II	MNJ_SCS1	Spot-check	50	Male	Yes	Secondary or higher	Yes	Yes	No	Yes	Yes	Yes	No	No	Yes	No	No	No	No	Negative	NA
FI05013	MANANJARY	AMBOHIMIARINA II	MNJ_SCS1	Spot-check	30	Male	Yes	Primary	No	No	No	Yes	Yes	Yes	No	No	Yes	No	No	No	No	Negative	NA
FI05014	MANANJARY	AMBOHIMIARINA II	MNJ_SCS1	Spot-check	31	Male	No	No education	Yes	No	No	Yes	Yes	Yes	No	No	Yes	No	No	No	No	Negative	NA
FI05015	MANANJARY	AMBOHIMIARINA II	MNJ_SCS1	Spot-check	28	Male	Yes	Primary	Yes	Yes	Yes	Yes	No	Yes	Yes	Yes	Yes	No	No	No	Yes	Negative	NA
FI05016	MANANJARY	AMBOHIMIARINA II	MNJ_SCS1	Spot-check	29	Male	Yes	Secondary or higher	Yes	Yes	Yes	Yes	Yes	Yes	No	No	Yes	No	No	No	No	Negative	NA
FI05017	MANANJARY	AMBOHIMIARINA II	MNJ_SCS1	Spot-check	28	Male	No	No education	Yes	Yes	Yes	Yes	Yes	Yes	No	No	Yes	No	No	No	Yes	Negative	NA
FI05018	MANANJARY	AMBOHIMIARINA II	MNJ_SCS1	Spot-check	34	Male	No	No education	Yes	Yes	Yes	Yes	No	Yes	No	Yes	No	No	No	No	Yes	Negative	NA
FI05019	MANANJARY	AMBOHIMIARINA II	MNJ_SCS1	Spot-check	8	Female	No	No education	Yes	Yes	Yes	No	No	Yes	No	Yes	No	No	No	No	No	Negative	NA
FI05020	MANANJARY	AMBOHIMIARINA II	MNJ_SCS1	Spot-check	63	Male	Yes	Primary	Yes	Yes	Yes	No	No	Yes	No	No	Yes	No	No	No	Yes	Negative	NA
FI05021	MANANJARY	AMBOHIMIARINA II	MNJ_SCS1	Spot-check	35	Female	No	No education	Yes	Yes	Yes	Yes	Yes	No	No	No	No	No	No	No	No	Negative	NA
FI05022	MANANJARY	AMBOHIMIARINA II	MNJ_SCS1	Spot-check	48	Female	No	No education	Yes	Yes	Yes	Yes	Yes	No	No	No	No	No	No	No	No	Negative	NA
FI05023	MANANJARY	AMBOHIMIARINA II	MNJ_SCS1	Spot-check	34	Female	No	No education	Yes	Yes	Yes	No	Yes	No	No	No	No	No	No	No	No	Negative	NA
FI05024	MANANJARY	AMBOHIMIARINA II	MNJ_SCS1	Spot-check	15	Male	No	No education	Yes	Yes	Yes	Yes	Yes	No	No	No	No	No	No	No	No	Negative	NA
FI05025	MANANJARY	AMBOHIMIARINA II	MNJ_SCS1	Spot-check	7	Female	No	No education	Yes	Yes	Yes	Yes	Yes	No	No	No	No	No	No	No	No	Negative	NA
FI05026	MANANJARY	AMBOHIMIARINA II	MNJ_SCS1	Spot-check	6	Female	No	No education	Yes	Yes	Yes	Yes	Yes	No	No	No	No	No	No	No	No	Negative	NA
FI05027	MANANJARY	AMBOHIMIARINA II	MNJ_SCS1	Spot-check	14	Female	Yes	Primary	No	No	No	Yes	Yes	Yes	No	Yes	No	No	No	No	Yes	Negative	NA
FI05028	MANANJARY	AMBOHIMIARINA II	MNJ_SCS1	Spot-check	13	Male	Yes	Primary	Yes	Yes	Yes	Yes	Yes	Yes	No	No	Yes	No	No	No	No	Negative	NA
FI05029	MANANJARY	AMBOHIMIARINA II	MNJ_SCS1	Spot-check	9	Male	Yes	Primary	Yes	NA	Yes	Yes	Yes	No	No	No	No	No	No	No	No	Negative	NA
FI05030	MANANJARY	AMBOHIMIARINA II	MNJ_SCS1	Spot-check	8	Male	Yes	Primary	Yes	Yes	Yes	Yes	Yes	No	No	No	No	No	No	No	No	Negative	NA
FI05031	MANANJARY	AMBOHIMIARINA II	MNJ_SCS1	Spot-check	25	Female	Yes	Primary	Yes	Yes	Yes	Yes	Yes	Yes	No	Yes	No	No	No	No	Yes	Negative	NA
FI05032	MANANJARY	AMBOHIMIARINA II	MNJ_SCS1	Spot-check	6	Female	Yes	Primary	Yes	Yes	Yes	Yes	Yes	Yes	Yes	Yes	No	No	No	No	NA	Negative	NA
FI05033	MANANJARY	AMBOHIMIARINA II	MNJ_SCS1	Spot-check	5	Female	Yes	Primary	Yes	Yes	Yes	Yes	Yes	Yes	No	Yes	No	No	No	No	Yes	Negative	NA
FI05034	MANANJARY	AMBOHIMIARINA II	MNJ_SCS1	Spot-check	7	Female	Yes	Primary	Yes	Yes	Yes	Yes	No	Yes	Yes	Yes	No	No	No	No	Yes	Negative	NA
FI05035	MANANJARY	AMBOHIMIARINA II	MNJ_SCS1	Spot-check	6	Female	Yes	Primary	Yes	Yes	Yes	Yes	No	No	No	No	No	No	No	No	No	Negative	NA
FI05036	MANANJARY	AMBOHIMIARINA II	MNJ_SCS1	Spot-check	36	Female	Yes	Primary	Yes	Yes	Yes	Yes	No	Yes	Yes	Yes	No	No	No	No	Yes	Negative	NA
FI05037	MANANJARY	AMBOHIMIARINA II	MNJ_SCS1	Spot-check	8	Female	Yes	Primary	Yes	Yes	Yes	Yes	No	Yes	Yes	Yes	Yes	No	No	No	Yes	Negative	NA
FI05038	MANANJARY	AMBOHIMIARINA II	MNJ_SCS1	Spot-check	8	Male	Yes	Primary	Yes	Yes	Yes	Yes	Yes	Yes	Yes	Yes	Yes	No	No	No	Yes	Negative	NA
FI05039	MANANJARY	AMBOHIMIARINA II	MNJ_SCS1	Spot-check	6	Male	Yes	Primary	Yes	Yes	Yes	Yes	Yes	Yes	Yes	Yes	Yes	No	No	No	Yes	Negative	NA
FI05040	MANANJARY	AMBOHIMIARINA II	MNJ_SCS1	Spot-check	7	Male	Yes	Primary	Yes	Yes	Yes	Yes	Yes	Yes	No	No	Yes	No	No	No	Yes	Negative	NA
FI05041	MANANJARY	AMBOHIMIARINA II	MNJ_SCS1	Spot-check	20	Male	Yes	Primary	Yes	Yes	Yes	Yes	Yes	Yes	No	No	Yes	No	No	No	Yes	Negative	NA
FI05042	MANANJARY	AMBOHIMIARINA II	MNJ_SCS1	Spot-check	10	Female	Yes	Primary	Yes	Yes	Yes	No	No	No	No	No	No	No	No	No	No	Negative	NA
FI05043	MANANJARY	AMBOHIMIARINA II	MNJ_SCS1	Spot-check	10	Male	Yes	Primary	Yes	Yes	Yes	No	No	No	No	No	No	No	No	No	No	Negative	NA
FI05044	MANANJARY	AMBOHIMIARINA II	MNJ_SCS1	Spot-check	7	Male	Yes	Primary	Yes	Yes	Yes	No	No	No	No	No	No	No	No	No	No	Negative	NA
FI05045	MANANJARY	AMBOHIMIARINA II	MNJ_SCS1	Spot-check	6	Male	Yes	Primary	Yes	Yes	Yes	No	No	No	No	No	No	No	No	No	No	Negative	NA
FI05046	MANANJARY	AMBOHIMIARINA II	MNJ_SCS1	Spot-check	44	Female	Yes	Secondary or higher	Yes	Yes	Yes	Yes	Yes	Yes	No	No	Yes	No	No	No	Yes	Negative	NA
FI05047	MANANJARY	AMBOHIMIARINA II	MNJ_SCS1	Spot-check	10	Female	Yes	Primary	Yes	Yes	Yes	No	NA	No	No	No	No	No	No	No	No	Negative	NA
FI05048	MANANJARY	AMBOHIMIARINA II	MNJ_SCS1	Spot-check	11	Female	Yes	Primary	Yes	Yes	Yes	No	No	No	No	No	No	No	No	No	No	Negative	NA
FI05049	MANANJARY	AMBOHIMIARINA II	MNJ_SCS1	Spot-check	11	Female	Yes	Primary	Yes	Yes	Yes	No	No	No	No	No	No	No	No	No	No	Negative	NA
FI05050	MANANJARY	AMBOHIMIARINA II	MNJ_SCS1	Spot-check	8	Female	Yes	Primary	Yes	Yes	Yes	No	No	No	No	No	No	No	No	No	No	Negative	NA
FI05051	MANANJARY	AMBOHIMIARINA II	MNJ_SCS1	Spot-check	19	Female	No	No education	Yes	Yes	Yes	Yes	Yes	Yes	Yes	Yes	Yes	No	No	No	Yes	Negative	NA
FI05052	MANANJARY	AMBOHIMIARINA II	MNJ_SCS1	Spot-check	19	Male	Yes	Primary	Yes	Yes	Yes	Yes	Yes	Yes	No	No	Yes	No	No	No	Yes	Negative	NA
FI05053	MANANJARY	AMBOHIMIARINA II	MNJ_SCS1	Spot-check	18	Female	No	No education	Yes	Yes	Yes	Yes	Yes	Yes	Yes	Yes	Yes	No	No	No	Yes	Negative	NA
FI05054	MANANJARY	AMBOHIMIARINA II	MNJ_SCS1	Spot-check	30	Female	No	No education	Yes	Yes	Yes	No	No	Yes	No	Yes	No	No	No	No	Yes	Negative	NA
FI05055	MANANJARY	AMBOHIMIARINA II	MNJ_SCS1	Spot-check	10	Female	Yes	Primary	Yes	Yes	Yes	No	No	No	No	No	No	No	No	No	No	Negative	NA
FI05056	MANANJARY	AMBOHIMIARINA II	MNJ_SCS1	Spot-check	8	Female	Yes	Primary	Yes	Yes	Yes	No	No	Yes	Yes	Yes	No	No	No	No	Yes	Negative	NA
FI05057	MANANJARY	AMBOHIMIARINA II	MNJ_SCS1	Spot-check	7	Female	Yes	Primary	Yes	Yes	Yes	No	No	Yes	No	No	Yes	No	No	No	Yes	Negative	NA
FI05058	MANANJARY	AMBOHIMIARINA II	MNJ_SCS1	Spot-check	8	Female	Yes	Primary	Yes	Yes	Yes	No	No	Yes	No	Yes	Yes	No	No	No	Yes	Negative	NA
FI05059	MANANJARY	AMBOHIMIARINA II	MNJ_SCS1	Spot-check	18	Female	No	No education	Yes	Yes	Yes	Yes	No	Yes	Yes	Yes	Yes	No	No	No	Yes	Negative	NA
FI05060	MANANJARY	AMBOHIMIARINA II	MNJ_SCS1	Spot-check	30	Female	No	No education	Yes	Yes	Yes	No	No	Yes	No	Yes	Yes	No	No	No	Yes	Negative	NA
FI05061	MANANJARY	AMBOHIMIARINA II	MNJ_SCS1	Spot-check	18	Female	Yes	Primary	Yes	Yes	Yes	Yes	Yes	No	No	No	No	No	No	No	No	Negative	NA
FI05062	MANANJARY	AMBOHIMIARINA II	MNJ_SCS1	Spot-check	57	Female	Yes	Primary	Yes	Yes	Yes	Yes	NA	Yes	No	No	Yes	No	No	No	NA	Negative	NA
FI05063	MANANJARY	AMBOHIMIARINA II	MNJ_SCS1	Spot-check	16	Female	Yes	Primary	Yes	Yes	Yes	No	No	No	No	No	No	No	No	No	No	Negative	NA
FI05064	MANANJARY	AMBOHIMIARINA II	MNJ_SCS1	Spot-check	9	Female	Yes	Primary	No	No	No	Yes	Yes	No	No	No	No	No	No	No	No	Negative	NA
FI05065	MANANJARY	AMBOHIMIARINA II	MNJ_SCS1	Spot-check	9	Male	Yes	Primary	Yes	Yes	Yes	No	No	No	No	No	No	No	No	No	No	Negative	NA
FI05066	MANANJARY	AMBOHIMIARINA II	MNJ_SCS1	Spot-check	6	Female	Yes	Primary	Yes	Yes	Yes	No	No	No	No	No	No	No	No	No	No	Negative	NA
FI05067	MANANJARY	AMBOHIMIARINA II	MNJ_SCS1	Spot-check	50	Female	Yes	Secondary or higher	Yes	Yes	Yes	Yes	Yes	No	No	No	No	No	No	No	No	Negative	NA
FI05068	MANANJARY	AMBOHIMIARINA II	MNJ_SCS1	Spot-check	19	Male	Yes	Primary	Yes	Yes	Yes	Yes	Yes	No	No	No	No	No	No	No	No	Negative	NA
FI05069	MANANJARY	AMBOHIMIARINA II	MNJ_SCS1	Spot-check	19	Female	Yes	Primary	Yes	Yes	Yes	Yes	Yes	No	No	No	No	No	No	No	No	Negative	NA
FI05070	MANANJARY	AMBOHIMIARINA II	MNJ_SCS1	Spot-check	18	Female	Yes	Primary	Yes	Yes	Yes	Yes	Yes	Yes	No	No	No	No	No	Yes	Yes	Negative	NA
FI05071	MANANJARY	AMBOHIMIARINA II	MNJ_SCS1	Spot-check	37	Male	No	No education	Yes	Yes	Yes	Yes	Yes	Yes	No	No	Yes	No	No	No	Yes	Negative	NA
FI05072	MANANJARY	AMBOHIMIARINA II	MNJ_SCS1	Spot-check	30	Male	NA	NA	Yes	NA	No	NA	NA	NA	NA	NA	NA	NA	NA	NA	NA	Negative	NA
FI05073	MANANJARY	AMBOHIMIARINA II	MNJ_SCS1	Spot-check	28	Female	No	No education	Yes	Yes	Yes	Yes	Yes	Yes	No	No	Yes	No	No	No	Yes	Negative	NA
FI05074	MANANJARY	AMBOHIMIARINA II	MNJ_SCS1	Spot-check	18	Female	Yes	Secondary or higher	Yes	Yes	Yes	Yes	Yes	Yes	No	No	Yes	No	No	No	Yes	Negative	NA
FI05075	MANANJARY	AMBOHIMIARINA II	MNJ_SCS1	Spot-check	40	Male	No	No education	Yes	Yes	Yes	Yes	Yes	Yes	No	No	Yes	No	No	No	Yes	Negative	NA
FI05076	MANANJARY	AMBOHIMIARINA II	MNJ_SCS1	Spot-check	39	Female	Yes	Primary	Yes	Yes	Yes	No	Yes	Yes	No	Yes	Yes	No	No	No	Yes	Negative	NA
FI05077	MANANJARY	AMBOHIMIARINA II	MNJ_SCS1	Spot-check	9	Female	Yes	Primary	Yes	Yes	Yes	No	No	No	No	No	No	No	No	No	No	Negative	NA
FI05078	MANANJARY	AMBOHIMIARINA II	MNJ_SCS1	Spot-check	8	Male	Yes	Primary	Yes	Yes	Yes	No	Yes	No	No	No	No	No	No	No	No	Negative	NA
FI05079	MANANJARY	AMBOHIMIARINA II	MNJ_SCS1	Spot-check	6	Female	Yes	Primary	Yes	Yes	Yes	No	No	No	No	No	No	No	No	No	No	Negative	NA
FI05080	MANANJARY	AMBOHIMIARINA II	MNJ_SCS1	Spot-check	80	Male	Yes	Primary	Yes	Yes	Yes	No	No	No	No	No	No	No	No	No	No	Positive	Negative
FI05081	MANANJARY	AMBOHIMIARINA II	MNJ_SCS1	Spot-check	13	Female	Yes	Primary	Yes	Yes	Yes	Yes	Yes	Yes	No	Yes	No	Yes	No	No	Yes	Negative	NA
FI05082	MANANJARY	AMBOHIMIARINA II	MNJ_SCS1	Spot-check	10	Female	Yes	Primary	Yes	Yes	Yes	No	No	Yes	No	Yes	No	Yes	No	No	No	Negative	NA
FI05083	MANANJARY	AMBOHIMIARINA II	MNJ_SCS1	Spot-check	6	Female	Yes	Secondary or higher	Yes	Yes	Yes	No	No	No	No	No	No	No	No	No	No	Negative	NA
FI05084	MANANJARY	AMBOHIMIARINA II	MNJ_SCS1	Spot-check	8	Female	Yes	Primary	Yes	Yes	Yes	No	No	No	No	No	No	No	No	No	No	Negative	NA
FI05085	MANANJARY	AMBOHIMIARINA II	MNJ_SCS1	Spot-check	38	Male	No	No education	Yes	Yes	Yes	Yes	No	Yes	Yes	No	No	No	No	No	Yes	Negative	NA
FI05086	MANANJARY	AMBOHIMIARINA II	MNJ_SCS1	Spot-check	10	Male	Yes	Primary	Yes	Yes	Yes	Yes	No	Yes	No	Yes	No	No	No	No	No	Negative	NA
FI05087	MANANJARY	AMBOHIMIARINA II	MNJ_SCS1	Spot-check	32	Female	Yes	Primary	Yes	Yes	Yes	Yes	Yes	Yes	No	Yes	No	No	No	No	Yes	Negative	NA
FI05088	MANANJARY	AMBOHIMIARINA II	MNJ_SCS1	Spot-check	10	Male	Yes	Primary	Yes	Yes	Yes	No	NA	Yes	No	No	Yes	No	No	No	Yes	Negative	NA
FI05089	MANANJARY	AMBOHIMIARINA II	MNJ_SCS1	Spot-check	70	Male	No	No education	Yes	Yes	Yes	Yes	No	Yes	No	Yes	No	No	No	No	Yes	Negative	NA
FI05090	MANANJARY	AMBOHIMIARINA II	MNJ_SCS1	Spot-check	11	Female	Yes	Primary	Yes	Yes	Yes	Yes	No	Yes	No	Yes	Yes	No	No	No	No	Negative	NA
FI05091	MANANJARY	AMBOHIMIARINA II	MNJ_SCS1	Spot-check	9	Male	No	No education	Yes	Yes	Yes	No	No	Yes	Yes	Yes	No	No	No	No	Yes	Negative	NA
FI05092	MANANJARY	AMBOHIMIARINA II	MNJ_SCS1	Spot-check	74	Male	Yes	Primary	Yes	Yes	Yes	No	No	Yes	No	Yes	Yes	No	No	No	Yes	Negative	NA
FI05093	MANANJARY	AMBOHIMIARINA II	MNJ_SCS1	Spot-check	12	Male	Yes	Primary	Yes	Yes	Yes	Yes	No	Yes	Yes	Yes	Yes	No	No	No	Yes	Negative	NA
FI05094	MANANJARY	AMBOHIMIARINA II	MNJ_SCS1	Spot-check	10	Male	Yes	Primary	Yes	Yes	Yes	Yes	No	Yes	No	Yes	No	No	No	No	Yes	Negative	NA
FI05095	MANANJARY	AMBOHIMIARINA II	MNJ_SCS1	Spot-check	80	Male	Yes	Primary	Yes	Yes	Yes	Yes	No	Yes	Yes	Yes	No	No	No	No	Yes	Negative	NA
FI05096	MANANJARY	AMBOHIMIARINA II	MNJ_SCS1	Spot-check	35	Male	Yes	Primary	Yes	Yes	Yes	Yes	No	Yes	No	Yes	Yes	No	No	No	Yes	Negative	NA
FI05097	MANANJARY	AMBOHIMIARINA II	MNJ_SCS1	Spot-check	22	Female	No	No education	Yes	Yes	Yes	No	No	Yes	No	Yes	No	No	No	No	Yes	Positive	Negative
FI05098	MANANJARY	AMBOHIMIARINA II	MNJ_SCS1	Spot-check	6	Male	Yes	Primary	Yes	Yes	Yes	Yes	No	No	No	No	No	No	No	No	No	Negative	NA
FI05099	MANANJARY	AMBOHIMIARINA II	MNJ_SCS1	Spot-check	23	Male	No	No education	Yes	Yes	Yes	Yes	No	No	No	No	No	No	No	No	No	Negative	NA
FI05100	MANANJARY	AMBOHIMIARINA II	MNJ_SCS1	Spot-check	38	Female	No	No education	Yes	Yes	Yes	Yes	No	Yes	Yes	Yes	Yes	No	No	No	Yes	Negative	NA
FI05101	MANANJARY	MAROSANGY	MNJ_SCS2	Spot-check	16	Female	Yes	Primary	Yes	Yes	Yes	Yes	No	No	No	No	No	No	No	No	No	Negative	NA
FI05102	MANANJARY	MAROSANGY	MNJ_SCS2	Spot-check	7	Male	Yes	Primary	Yes	Yes	Yes	No	No	No	No	No	No	No	No	No	No	Negative	NA
FI05103	MANANJARY	MAROSANGY	MNJ_SCS2	Spot-check	7	Male	Yes	Primary	Yes	Yes	Yes	No	No	No	No	No	No	No	No	No	No	Negative	NA
FI05104	MANANJARY	MAROSANGY	MNJ_SCS2	Spot-check	70	Male	Yes	Primary	No	No	No	Yes	Yes	Yes	No	No	No	No	No	No	No	Negative	NA
FI05105	MANANJARY	MAROSANGY	MNJ_SCS2	Spot-check	45	Female	No	No education	No	No	No	No	Yes	Yes	No	No	Yes	No	No	No	Yes	Negative	NA
FI05106	MANANJARY	MAROSANGY	MNJ_SCS2	Spot-check	26	Male	No	No education	Yes	Yes	Yes	Yes	Yes	Yes	No	No	No	No	No	No	Yes	Negative	NA
FI05107	MANANJARY	MAROSANGY	MNJ_SCS2	Spot-check	50	Female	No	No education	Yes	Yes	Yes	Yes	Yes	Yes	No	No	No	No	No	No	Yes	Negative	NA
FI05108	MANANJARY	MAROSANGY	MNJ_SCS2	Spot-check	10	Male	No	No education	Yes	Yes	Yes	Yes	Yes	Yes	No	No	No	No	No	No	Yes	Negative	NA
FI05109	MANANJARY	MAROSANGY	MNJ_SCS2	Spot-check	58	Female	No	No education	Yes	Yes	Yes	Yes	NA	No	No	No	No	No	No	No	No	Negative	NA
FI05110	MANANJARY	MAROSANGY	MNJ_SCS2	Spot-check	15	Female	No	No education	Yes	Yes	Yes	Yes	Yes	No	No	No	No	No	No	No	No	Negative	NA
FI05111	MANANJARY	MAROSANGY	MNJ_SCS2	Spot-check	10	Male	Yes	Primary	Yes	Yes	Yes	Yes	Yes	No	No	No	No	No	No	No	No	Negative	NA
FI05112	MANANJARY	MAROSANGY	MNJ_SCS2	Spot-check	9	Male	Yes	Primary	Yes	Yes	Yes	Yes	Yes	No	No	No	No	No	No	No	No	Negative	NA
FI05113	MANANJARY	MAROSANGY	MNJ_SCS2	Spot-check	60	Male	Yes	Primary	Yes	Yes	Yes	Yes	No	Yes	No	Yes	Yes	No	No	No	Yes	Positive	Positive
FI05114	MANANJARY	MAROSANGY	MNJ_SCS2	Spot-check	20	Female	Yes	Secondary or higher	Yes	Yes	Yes	Yes	No	Yes	Yes	Yes	No	No	No	No	Yes	Negative	NA
FI05115	MANANJARY	MAROSANGY	MNJ_SCS2	Spot-check	14	Female	Yes	Primary	Yes	Yes	Yes	Yes	No	Yes	No	No	Yes	No	No	No	No	Negative	NA
FI05116	MANANJARY	MAROSANGY	MNJ_SCS2	Spot-check	19	Female	Yes	Primary	Yes	Yes	Yes	Yes	No	Yes	No	Yes	Yes	No	No	No	Yes	Negative	NA
FI05117	MANANJARY	MAROSANGY	MNJ_SCS2	Spot-check	8	Female	Yes	Primary	Yes	Yes	Yes	Yes	Yes	No	No	No	No	No	No	No	No	Negative	NA
FI05118	MANANJARY	MAROSANGY	MNJ_SCS2	Spot-check	19	Female	Yes	Primary	Yes	Yes	Yes	Yes	NA	Yes	No	Yes	No	No	No	No	Yes	Negative	NA
FI05119	MANANJARY	MAROSANGY	MNJ_SCS2	Spot-check	8	Female	No	No education	Yes	Yes	Yes	Yes	Yes	No	No	No	No	No	No	No	No	Negative	NA
FI05120	MANANJARY	MAROSANGY	MNJ_SCS2	Spot-check	21	Female	Yes	Primary	Yes	Yes	Yes	Yes	No	Yes	No	No	Yes	No	No	No	Yes	Negative	NA
FI05121	MANANJARY	MAROSANGY	MNJ_SCS2	Spot-check	13	Female	Yes	Primary	Yes	Yes	Yes	Yes	Yes	Yes	Yes	Yes	Yes	No	No	No	Yes	Negative	NA
FI05122	MANANJARY	MAROSANGY	MNJ_SCS2	Spot-check	14	Female	Yes	Primary	Yes	Yes	Yes	Yes	Yes	Yes	No	Yes	Yes	No	No	No	Yes	Negative	NA
FI05123	MANANJARY	MAROSANGY	MNJ_SCS2	Spot-check	30	Male	Yes	Secondary or higher	Yes	Yes	Yes	Yes	Yes	Yes	No	Yes	No	Yes	No	No	Yes	Negative	NA
FI05124	MANANJARY	MAROSANGY	MNJ_SCS2	Spot-check	10	Male	Yes	Primary	Yes	Yes	Yes	Yes	Yes	No	No	No	No	No	No	No	No	Negative	NA
FI05125	MANANJARY	MAROSANGY	MNJ_SCS2	Spot-check	9	Male	Yes	Primary	Yes	NA	Yes	NA	Yes	No	No	No	No	No	No	No	No	Negative	NA
FI05126	MANANJARY	MAROSANGY	MNJ_SCS2	Spot-check	8	Male	Yes	Primary	Yes	Yes	Yes	Yes	Yes	No	No	No	No	No	No	No	No	Negative	NA
FI05127	MANANJARY	MAROSANGY	MNJ_SCS2	Spot-check	43	Female	Yes	Primary	Yes	Yes	Yes	Yes	Yes	Yes	No	Yes	No	No	No	No	Yes	Negative	NA
FI05128	MANANJARY	MAROSANGY	MNJ_SCS2	Spot-check	12	Female	Yes	Primary	Yes	Yes	Yes	Yes	Yes	No	No	No	No	No	No	No	No	Negative	NA
FI05129	MANANJARY	MAROSANGY	MNJ_SCS2	Spot-check	7	Female	Yes	Primary	Yes	Yes	Yes	Yes	Yes	No	No	No	No	No	No	No	No	Negative	NA
FI05130	MANANJARY	MAROSANGY	MNJ_SCS2	Spot-check	14	Female	Yes	Secondary or higher	Yes	Yes	Yes	Yes	Yes	No	No	No	No	No	No	No	No	Negative	NA
FI05131	MANANJARY	MAROSANGY	MNJ_SCS2	Spot-check	12	Female	Yes	Primary	Yes	Yes	Yes	Yes	Yes	No	No	No	No	No	No	No	No	Negative	NA
FI05132	MANANJARY	MAROSANGY	MNJ_SCS2	Spot-check	20	Male	Yes	Secondary or higher	Yes	Yes	Yes	Yes	Yes	Yes	No	Yes	No	Yes	No	No	Yes	Negative	NA
FI05133	MANANJARY	MAROSANGY	MNJ_SCS2	Spot-check	24	Female	Yes	Primary	Yes	Yes	Yes	Yes	Yes	Yes	No	No	No	Yes	No	No	No	Negative	NA
FI05134	MANANJARY	MAROSANGY	MNJ_SCS2	Spot-check	51	Female	Yes	Primary	Yes	Yes	Yes	Yes	Yes	No	No	No	No	No	No	No	No	Negative	NA
FI05135	MANANJARY	MAROSANGY	MNJ_SCS2	Spot-check	28	Male	Yes	Secondary or higher	Yes	Yes	Yes	Yes	Yes	Yes	Yes	Yes	Yes	No	No	Yes	Yes	Negative	NA
FI05136	MANANJARY	MAROSANGY	MNJ_SCS2	Spot-check	12	Male	Yes	Primary	Yes	Yes	Yes	Yes	Yes	Yes	No	No	Yes	No	No	No	Yes	Negative	NA
FI05137	MANANJARY	MAROSANGY	MNJ_SCS2	Spot-check	9	Male	Yes	Primary	Yes	Yes	Yes	Yes	Yes	Yes	No	No	Yes	No	No	No	Yes	Negative	NA
FI05138	MANANJARY	MAROSANGY	MNJ_SCS2	Spot-check	8	Female	Yes	Primary	Yes	Yes	Yes	Yes	Yes	Yes	No	No	Yes	No	No	No	Yes	Negative	NA
FI05139	MANANJARY	MAROSANGY	MNJ_SCS2	Spot-check	25	Male	Yes	Secondary or higher	Yes	Yes	Yes	Yes	Yes	Yes	No	No	No	Yes	No	Yes	Yes	Negative	NA
FI05140	MANANJARY	MAROSANGY	MNJ_SCS2	Spot-check	20	Male	Yes	Primary	Yes	Yes	Yes	No	No	Yes	No	Yes	No	No	No	No	Yes	Negative	NA
FI05141	MANANJARY	MAROSANGY	MNJ_SCS2	Spot-check	18	Female	Yes	Primary	Yes	Yes	Yes	Yes	No	Yes	No	Yes	No	No	No	No	Yes	Negative	NA
FI05142	MANANJARY	MAROSANGY	MNJ_SCS2	Spot-check	27	Female	Yes	Primary	Yes	Yes	Yes	Yes	No	Yes	No	Yes	No	No	No	No	Yes	Negative	NA
FI05143	MANANJARY	MAROSANGY	MNJ_SCS2	Spot-check	18	Male	Yes	Primary	Yes	Yes	Yes	Yes	No	Yes	No	No	Yes	No	No	No	Yes	Negative	NA
FI05144	MANANJARY	MAROSANGY	MNJ_SCS2	Spot-check	47	Male	Yes	Primary	Yes	Yes	Yes	Yes	Yes	Yes	No	Yes	No	No	No	No	Yes	Negative	NA
FI05145	MANANJARY	MAROSANGY	MNJ_SCS2	Spot-check	46	Female	Yes	Primary	Yes	Yes	Yes	Yes	No	Yes	No	No	Yes	No	No	No	Yes	Negative	NA
FI05146	MANANJARY	MAROSANGY	MNJ_SCS2	Spot-check	18	Male	Yes	Primary	Yes	Yes	Yes	Yes	No	Yes	No	Yes	No	No	No	No	Yes	Negative	NA
FI05147	MANANJARY	MAROSANGY	MNJ_SCS2	Spot-check	36	Male	No	No education	Yes	Yes	Yes	No	NA	Yes	No	Yes	No	No	No	No	Yes	Negative	NA
FI05148	MANANJARY	MAROSANGY	MNJ_SCS2	Spot-check	21	Male	Yes	Primary	Yes	Yes	Yes	Yes	No	Yes	No	Yes	No	No	No	No	Yes	Negative	NA
FI05149	MANANJARY	MAROSANGY	MNJ_SCS2	Spot-check	38	Male	Yes	Primary	Yes	Yes	Yes	Yes	No	Yes	No	No	Yes	No	No	No	Yes	Negative	NA
FI05150	MANANJARY	MAROSANGY	MNJ_SCS2	Spot-check	24	Male	Yes	Primary	Yes	Yes	Yes	Yes	Yes	Yes	No	No	No	No	No	No	Yes	Negative	NA
FI05151	MANANJARY	MAROSANGY	MNJ_SCS2	Spot-check	24	Male	Yes	Primary	Yes	Yes	Yes	Yes	Yes	Yes	No	Yes	Yes	Yes	No	No	Yes	Negative	NA
FI05152	MANANJARY	MAROSANGY	MNJ_SCS2	Spot-check	22	Male	Yes	Secondary or higher	Yes	Yes	Yes	Yes	Yes	Yes	No	Yes	Yes	Yes	No	No	Yes	Negative	NA
FI05153	MANANJARY	MAROSANGY	MNJ_SCS2	Spot-check	35	Male	Yes	Primary	Yes	Yes	Yes	Yes	Yes	Yes	No	Yes	Yes	No	No	No	Yes	Negative	NA
FI05154	MANANJARY	MAROSANGY	MNJ_SCS2	Spot-check	22	Female	Yes	Primary	Yes	Yes	Yes	NA	Yes	Yes	No	Yes	Yes	Yes	No	No	Yes	Negative	NA
FI05155	MANANJARY	MAROSANGY	MNJ_SCS2	Spot-check	24	Male	Yes	Primary	Yes	Yes	Yes	Yes	Yes	No	No	No	No	No	No	No	No	Negative	NA
FI05156	MANANJARY	MAROSANGY	MNJ_SCS2	Spot-check	35	Male	Yes	Primary	Yes	Yes	Yes	Yes	Yes	Yes	No	Yes	Yes	Yes	No	No	Yes	Negative	NA
FI05157	MANANJARY	MAROSANGY	MNJ_SCS2	Spot-check	50	Male	Yes	Primary	Yes	Yes	Yes	Yes	Yes	Yes	No	Yes	Yes	Yes	No	No	Yes	Negative	NA
FI05158	MANANJARY	MAROSANGY	MNJ_SCS2	Spot-check	32	Male	Yes	Secondary or higher	Yes	Yes	Yes	Yes	Yes	Yes	Yes	Yes	Yes	Yes	No	No	Yes	Negative	NA
FI05159	MANANJARY	MAROSANGY	MNJ_SCS2	Spot-check	53	Male	Yes	Primary	Yes	Yes	Yes	Yes	Yes	Yes	No	Yes	Yes	Yes	No	No	Yes	Negative	NA
FI05160	MANANJARY	MAROSANGY	MNJ_SCS2	Spot-check	45	Male	Yes	Primary	Yes	Yes	Yes	Yes	Yes	Yes	No	No	Yes	No	No	No	Yes	Negative	NA
FI05161	MANANJARY	MAROSANGY	MNJ_SCS2	Spot-check	42	Female	No	No education	Yes	Yes	Yes	Yes	No	Yes	No	No	Yes	Yes	No	No	No	Negative	NA
FI05162	MANANJARY	MAROSANGY	MNJ_SCS2	Spot-check	63	Male	Yes	Secondary or higher	Yes	Yes	Yes	No	No	Yes	No	Yes	No	No	No	No	Yes	Negative	NA
FI05163	MANANJARY	MAROSANGY	MNJ_SCS2	Spot-check	42	Male	Yes	Primary	Yes	Yes	Yes	No	No	Yes	No	No	No	No	No	No	No	Negative	NA
FI05164	MANANJARY	MAROSANGY	MNJ_SCS2	Spot-check	35	Male	No	No education	Yes	Yes	Yes	NA	Yes	Yes	No	Yes	Yes	No	No	No	Yes	Negative	NA
FI05165	MANANJARY	MAROSANGY	MNJ_SCS2	Spot-check	64	Male	Yes	Primary	Yes	Yes	Yes	No	No	No	No	No	No	No	No	No	No	Negative	NA
FI05166	MANANJARY	MAROSANGY	MNJ_SCS2	Spot-check	21	Female	No	No education	Yes	Yes	Yes	No	No	Yes	No	No	Yes	No	No	No	Yes	Negative	NA
FI05167	MANANJARY	MAROSANGY	MNJ_SCS2	Spot-check	48	Female	No	No education	No	No	No	No	No	No	No	No	No	No	No	No	No	Negative	NA
FI05168	MANANJARY	MAROSANGY	MNJ_SCS2	Spot-check	15	Female	Yes	Secondary or higher	Yes	Yes	Yes	No	Yes	Yes	No	No	Yes	No	No	No	Yes	Negative	NA
FI05169	MANANJARY	MAROSANGY	MNJ_SCS2	Spot-check	25	Female	No	No education	Yes	Yes	Yes	No	No	Yes	No	Yes	No	No	No	No	No	Negative	NA
FI05170	MANANJARY	MAROSANGY	MNJ_SCS2	Spot-check	12	Female	Yes	Secondary or higher	Yes	Yes	Yes	No	No	No	No	No	No	No	No	No	No	Negative	NA
FI05171	MANANJARY	MAROSANGY	MNJ_SCS2	Spot-check	21	Female	Yes	Primary	Yes	Yes	Yes	Yes	NA	No	No	No	No	No	No	No	No	Negative	NA
FI05172	MANANJARY	MAROSANGY	MNJ_SCS2	Spot-check	13	Male	Yes	Secondary or higher	Yes	Yes	Yes	No	No	No	No	No	No	No	No	No	No	Positive	Negative
FI05173	MANANJARY	MAROSANGY	MNJ_SCS2	Spot-check	12	Female	Yes	Secondary or higher	Yes	Yes	Yes	Yes	Yes	No	No	No	No	No	No	No	No	Negative	NA
FI05174	MANANJARY	MAROSANGY	MNJ_SCS2	Spot-check	12	Male	Yes	Secondary or higher	Yes	Yes	Yes	Yes	Yes	Yes	No	No	Yes	No	No	No	Yes	Negative	NA
FI05175	MANANJARY	MAROSANGY	MNJ_SCS2	Spot-check	19	Female	Yes	Primary	Yes	Yes	Yes	No	Yes	No	No	No	No	No	No	No	No	Negative	NA
FI05176	MANANJARY	MAROSANGY	MNJ_SCS2	Spot-check	19	Female	Yes	Secondary or higher	No	No	No	Yes	Yes	Yes	Yes	No	No	No	No	No	Yes	Negative	NA
FI05177	MANANJARY	MAROSANGY	MNJ_SCS2	Spot-check	18	Male	Yes	Secondary or higher	Yes	Yes	Yes	No	No	No	No	No	No	No	No	No	No	Negative	NA
FI05178	MANANJARY	MAROSANGY	MNJ_SCS2	Spot-check	18	Male	Yes	Primary	Yes	Yes	No	No	No	No	No	No	No	No	No	No	No	Negative	NA
FI05179	MANANJARY	MAROSANGY	MNJ_SCS2	Spot-check	19	Female	Yes	Secondary or higher	No	No	No	No	No	Yes	No	No	Yes	No	No	No	Yes	Negative	NA
FI05180	MANANJARY	MAROSANGY	MNJ_SCS2	Spot-check	19	Female	Yes	Secondary or higher	Yes	Yes	Yes	No	No	No	No	No	No	No	No	No	No	Negative	NA
FI05181	MANANJARY	MAROSANGY	MNJ_SCS2	Spot-check	12	Female	Yes	Primary	Yes	Yes	Yes	No	No	No	No	No	No	No	No	No	No	Negative	NA
FI05182	MANANJARY	MAROSANGY	MNJ_SCS2	Spot-check	12	Female	Yes	Primary	Yes	Yes	Yes	No	No	No	No	No	No	No	No	No	No	Negative	NA
FI05183	MANANJARY	MAROSANGY	MNJ_SCS2	Spot-check	12	Female	Yes	Primary	Yes	Yes	Yes	No	No	No	No	No	No	No	No	No	No	Negative	NA
FI05184	MANANJARY	MAROSANGY	MNJ_SCS2	Spot-check	20	Male	Yes	Secondary or higher	Yes	Yes	Yes	No	No	No	No	No	No	No	No	No	No	Negative	NA
FI05185	MANANJARY	MAROSANGY	MNJ_SCS2	Spot-check	18	Male	Yes	Secondary or higher	No	No	No	No	Yes	No	No	No	No	No	No	No	No	Negative	NA
FI05186	MANANJARY	MAROSANGY	MNJ_SCS2	Spot-check	18	Male	Yes	Secondary or higher	Yes	Yes	Yes	No	No	No	No	No	No	No	No	No	No	Negative	NA
FI05187	MANANJARY	MAROSANGY	MNJ_SCS2	Spot-check	18	Male	Yes	Secondary or higher	No	No	No	No	No	Yes	Yes	No	No	No	No	No	Yes	Negative	NA
FI05188	MANANJARY	MAROSANGY	MNJ_SCS2	Spot-check	19	Female	Yes	Primary	Yes	Yes	Yes	No	No	No	No	No	No	No	No	No	No	Negative	NA
FI05189	MANANJARY	MAROSANGY	MNJ_SCS2	Spot-check	19	Female	Yes	Primary	No	No	No	No	No	No	No	No	No	No	No	No	No	Negative	NA
FI05190	MANANJARY	MAROSANGY	MNJ_SCS2	Spot-check	22	Female	Yes	Primary	Yes	Yes	Yes	No	No	No	No	No	No	No	No	No	No	Negative	NA
FI05191	MANANJARY	MAROSANGY	MNJ_SCS2	Spot-check	60	Female	No	No education	Yes	Yes	Yes	No	No	Yes	No	No	Yes	No	No	No	Yes	Negative	NA
FI05192	MANANJARY	MAROSANGY	MNJ_SCS2	Spot-check	13	Male	Yes	Primary	Yes	Yes	Yes	No	No	No	No	No	No	No	No	No	No	Negative	NA
FI05193	MANANJARY	MAROSANGY	MNJ_SCS2	Spot-check	12	Male	Yes	Primary	Yes	Yes	Yes	No	No	No	No	No	No	No	No	No	No	Negative	NA
FI05194	MANANJARY	MAROSANGY	MNJ_SCS2	Spot-check	14	Male	Yes	Primary	Yes	Yes	Yes	No	No	Yes	No	No	Yes	No	No	No	Yes	Negative	NA
FI05195	MANANJARY	MAROSANGY	MNJ_SCS2	Spot-check	22	Female	Yes	Primary	Yes	Yes	Yes	No	No	Yes	No	No	Yes	No	No	No	Yes	Negative	NA
FI05196	MANANJARY	MAROSANGY	MNJ_SCS2	Spot-check	17	Male	Yes	Secondary or higher	Yes	Yes	Yes	No	No	Yes	No	No	Yes	No	No	No	Yes	Negative	NA
FI05197	MANANJARY	MAROSANGY	MNJ_SCS2	Spot-check	15	Male	Yes	Secondary or higher	Yes	Yes	Yes	NA	No	Yes	No	No	Yes	No	No	No	Yes	Negative	NA
FI05198	MANANJARY	MAROSANGY	MNJ_SCS2	Spot-check	15	Male	Yes	Secondary or higher	No	No	No	No	No	Yes	No	Yes	Yes	No	No	No	Yes	Negative	NA
FI05199	MANANJARY	MAROSANGY	MNJ_SCS2	Spot-check	13	Male	Yes	Primary	Yes	Yes	Yes	No	No	Yes	No	No	Yes	No	No	Yes	Yes	Negative	NA
FI05200	MANANJARY	MAROSANGY	MNJ_SCS2	Spot-check	21	Female	No	No education	No	No	No	No	No	No	No	No	No	No	No	No	No	Positive	Negative
FI05201	MANANJARY	MAROSANGY	MNJ_SCS2	Spot-check	16	Female	Yes	Secondary or higher	Yes	Yes	Yes	Yes	Yes	Yes	No	No	Yes	No	No	No	Yes	Negative	NA
FI05202	MANANJARY	MAROSANGY	MNJ_SCS2	Spot-check	16	Male	Yes	Secondary or higher	No	No	No	No	No	No	No	No	No	No	No	No	No	Negative	NA
FI05203	MANANJARY	MAROSANGY	MNJ_SCS2	Spot-check	15	Female	Yes	Secondary or higher	Yes	Yes	Yes	Yes	Yes	No	No	No	No	No	No	No	No	Negative	NA
FI05204	MANANJARY	MAROSANGY	MNJ_SCS2	Spot-check	14	Female	Yes	Secondary or higher	No	No	No	No	No	No	No	No	No	No	No	No	No	Negative	NA
FI05205	MANANJARY	MAROSANGY	MNJ_SCS2	Spot-check	32	Female	No	No education	No	No	No	No	No	Yes	No	Yes	No	No	No	No	Yes	Positive	Negative
FI05206	MANANJARY	MAROSANGY	MNJ_SCS2	Spot-check	17	Male	Yes	Secondary or higher	Yes	No	No	No	No	No	No	No	No	No	No	No	No	Negative	NA
FI05207	MANANJARY	MAROSANGY	MNJ_SCS2	Spot-check	13	Female	Yes	Secondary or higher	Yes	Yes	Yes	No	No	No	No	No	No	No	No	No	No	Negative	NA
FI05208	MANANJARY	MAROSANGY	MNJ_SCS2	Spot-check	15	Female	Yes	Secondary or higher	Yes	Yes	Yes	Yes	Yes	No	No	No	No	No	No	No	No	Negative	NA
FI05209	MANANJARY	MAROSANGY	MNJ_SCS2	Spot-check	19	Female	Yes	Secondary or higher	Yes	Yes	Yes	No	No	No	No	No	No	No	No	No	No	Negative	NA
FI05210	MANANJARY	MAROSANGY	MNJ_SCS2	Spot-check	18	Male	Yes	Secondary or higher	No	No	No	No	No	No	No	No	No	No	No	No	No	Negative	NA
FI05211	MANANJARY	MAROSANGY	MNJ_SCS2	Spot-check	22	Female	Yes	Primary	No	No	No	Yes	Yes	Yes	No	Yes	No	No	No	No	Yes	Negative	NA
FI05212	MANANJARY	MAROSANGY	MNJ_SCS2	Spot-check	13	Female	Yes	Secondary or higher	Yes	Yes	Yes	Yes	Yes	Yes	No	Yes	No	No	No	No	Yes	Negative	NA
FI05213	MANANJARY	MAROSANGY	MNJ_SCS2	Spot-check	14	Female	Yes	Secondary or higher	Yes	Yes	Yes	Yes	No	No	No	No	No	No	No	No	No	Negative	NA
FI05214	MANANJARY	MAROSANGY	MNJ_SCS2	Spot-check	21	Male	Yes	Primary	Yes	Yes	Yes	Yes	Yes	No	No	No	No	No	No	No	No	Negative	NA
FI05215	MANANJARY	MAROSANGY	MNJ_SCS2	Spot-check	17	Female	Yes	Secondary or higher	Yes	Yes	Yes	Yes	Yes	Yes	No	No	Yes	No	No	No	Yes	Negative	NA
FI05216	MANANJARY	MAROSANGY	MNJ_SCS2	Spot-check	17	Female	Yes	Secondary or higher	Yes	Yes	Yes	No	No	Yes	No	Yes	Yes	No	No	No	Yes	Negative	NA
FI05217	MANANJARY	MAROSANGY	MNJ_SCS2	Spot-check	16	Female	Yes	Primary	Yes	Yes	Yes	No	Yes	Yes	No	Yes	Yes	No	No	No	No	Negative	NA
FI05218	MANANJARY	MAROSANGY	MNJ_SCS2	Spot-check	26	Female	Yes	Primary	Yes	Yes	Yes	No	No	Yes	Yes	Yes	No	No	No	No	Yes	Negative	NA
FI05219	MANANJARY	MAROSANGY	MNJ_SCS2	Spot-check	12	Male	Yes	Secondary or higher	Yes	Yes	Yes	No	No	Yes	Yes	Yes	No	No	No	No	Yes	Negative	NA
FI05220	MANANJARY	MAROSANGY	MNJ_SCS2	Spot-check	25	Male	No	No education	Yes	Yes	Yes	Yes	Yes	Yes	No	No	Yes	No	No	No	Yes	Negative	NA
FI05221	MANANJARY	MAROSANGY	MNJ_SCS2	Spot-check	40	Female	No	No education	Yes	Yes	Yes	No	No	Yes	Yes	Yes	No	No	No	No	Yes	Negative	NA
FI05222	MANANJARY	MAROSANGY	MNJ_SCS2	Spot-check	14	Female	Yes	Primary	Yes	Yes	Yes	No	No	Yes	Yes	Yes	No	No	No	No	Yes	Negative	NA
FI05223	MANANJARY	MAROSANGY	MNJ_SCS2	Spot-check	13	Female	Yes	Primary	Yes	Yes	Yes	No	No	No	No	No	No	No	No	No	No	Negative	NA
FI05224	MANANJARY	MAROSANGY	MNJ_SCS2	Spot-check	19	Female	Yes	Primary	Yes	Yes	Yes	No	Yes	No	No	No	No	No	No	No	No	Negative	NA
FI05225	MANANJARY	MAROSANGY	MNJ_SCS2	Spot-check	19	Male	Yes	Primary	Yes	Yes	Yes	No	No	Yes	No	Yes	Yes	No	No	No	Yes	Negative	NA
FI05226	MANANJARY	MAROSANGY	MNJ_SCS2	Spot-check	14	Female	Yes	Secondary or higher	Yes	Yes	Yes	No	No	Yes	No	No	Yes	No	No	No	Yes	Negative	NA
FI05227	MANANJARY	MAROSANGY	MNJ_SCS2	Spot-check	18	Male	Yes	Secondary or higher	Yes	Yes	Yes	Yes	Yes	Yes	No	No	Yes	No	No	No	Yes	Negative	NA
FI05228	MANANJARY	MAROSANGY	MNJ_SCS2	Spot-check	15	Male	Yes	Secondary or higher	Yes	Yes	Yes	Yes	Yes	Yes	No	No	Yes	Yes	No	No	Yes	Negative	NA
FI05229	MANANJARY	MAROSANGY	MNJ_SCS2	Spot-check	27	Male	Yes	Secondary or higher	Yes	Yes	Yes	No	No	Yes	No	Yes	Yes	No	No	No	Yes	Negative	NA
FI05230	MANANJARY	MAROSANGY	MNJ_SCS2	Spot-check	19	Female	Yes	Primary	No	No	No	No	No	Yes	No	Yes	Yes	No	No	No	Yes	Negative	NA
FI05231	MANANJARY	MAROSANGY	MNJ_SCS2	Spot-check	16	Female	Yes	Primary	No	No	No	No	No	Yes	No	Yes	Yes	No	No	No	Yes	Negative	NA
FI05232	MANANJARY	MAROSANGY	MNJ_SCS2	Spot-check	45	Female	Yes	Secondary or higher	Yes	Yes	Yes	Yes	Yes	Yes	Yes	Yes	No	No	No	No	Yes	Negative	NA
FI05233	MANANJARY	MAROSANGY	MNJ_SCS2	Spot-check	21	Female	Yes	Secondary or higher	Yes	Yes	Yes	No	Yes	Yes	Yes	Yes	Yes	No	No	No	Yes	Negative	NA
FI05234	MANANJARY	MAROSANGY	MNJ_SCS2	Spot-check	50	Female	No	No education	Yes	Yes	Yes	No	No	Yes	No	Yes	Yes	No	No	No	Yes	Positive	Negative
FI05235	MANANJARY	MAROSANGY	MNJ_SCS2	Spot-check	28	Female	No	No education	Yes	Yes	Yes	No	No	No	No	No	No	No	No	No	No	Negative	NA
FI05236	MANANJARY	MAROSANGY	MNJ_SCS2	Spot-check	13	Male	Yes	Primary	Yes	Yes	Yes	No	Yes	No	No	No	No	No	No	No	No	Negative	NA
FI05237	MANANJARY	MAROSANGY	MNJ_SCS2	Spot-check	61	Male	Yes	Primary	Yes	Yes	Yes	No	Yes	Yes	No	No	Yes	No	No	No	Yes	Negative	NA
FI05238	MANANJARY	MAROSANGY	MNJ_SCS2	Spot-check	13	Male	Yes	Primary	Yes	Yes	Yes	No	No	No	No	No	No	No	No	No	No	Negative	NA
FI05239	MANANJARY	MAROSANGY	MNJ_SCS2	Spot-check	12	Male	Yes	Primary	Yes	Yes	Yes	No	No	No	No	No	No	No	No	No	No	Negative	NA
FI05240	MANANJARY	MAROSANGY	MNJ_SCS2	Spot-check	11	Male	Yes	Primary	Yes	Yes	Yes	No	No	No	No	No	No	No	No	No	No	Negative	NA
FI05241	MANANJARY	MAROSANGY	MNJ_SCS2	Spot-check	39	Male	Yes	Primary	Yes	Yes	Yes	No	No	No	No	No	No	No	No	No	No	Negative	NA
FI05242	MANANJARY	MAROSANGY	MNJ_SCS2	Spot-check	13	Female	Yes	Primary	Yes	Yes	Yes	Yes	No	No	No	No	No	No	No	No	No	Negative	NA
FI05243	MANANJARY	MAROSANGY	MNJ_SCS2	Spot-check	9	Male	Yes	Primary	No	No	No	No	No	No	No	No	No	No	No	No	No	Negative	NA
FI05244	MANANJARY	MAROSANGY	MNJ_SCS2	Spot-check	29	Male	No	No education	No	No	No	No	No	Yes	No	Yes	Yes	No	No	No	Yes	Negative	NA
FI05245	MANANJARY	MAROSANGY	MNJ_SCS2	Spot-check	6	Female	No	No education	No	No	No	No	No	No	No	No	No	No	No	No	No	Negative	NA
FI05246	MANANJARY	MAROSANGY	MNJ_SCS2	Spot-check	6	Female	Yes	Primary	Yes	Yes	Yes	Yes	Yes	No	No	No	No	No	No	No	No	Negative	NA
FI05247	MANANJARY	MAROSANGY	MNJ_SCS2	Spot-check	38	Male	No	No education	No	No	No	No	No	Yes	No	Yes	Yes	No	No	No	Yes	Negative	NA
FI05248	MANANJARY	MAROSANGY	MNJ_SCS2	Spot-check	10	Male	Yes	Primary	No	No	No	No	No	No	No	No	No	No	No	No	No	Negative	NA
FI05249	MANANJARY	MAROSANGY	MNJ_SCS2	Spot-check	13	Female	Yes	Primary	No	No	No	No	No	No	No	No	No	No	No	No	No	Negative	NA
FI05250	MANANJARY	MAROSANGY	MNJ_SCS2	Spot-check	6	Male	No	No education	No	No	No	No	No	No	No	No	No	No	No	No	No	Negative	NA
FI05251	MANANJARY	MAROSANGY	MNJ_SCS2	Spot-check	30	Female	Yes	Primary	Yes	Yes	Yes	No	No	Yes	No	Yes	Yes	No	No	No	Yes	Negative	NA
FI05252	MANANJARY	MAROSANGY	MNJ_SCS2	Spot-check	8	Male	No	No education	Yes	Yes	Yes	No	No	No	No	No	No	No	No	No	No	Negative	NA
FI05253	MANANJARY	MAROSANGY	MNJ_SCS2	Spot-check	5	Female	No	No education	Yes	Yes	Yes	No	No	No	No	No	No	No	No	No	No	Negative	NA
FI05254	MANANJARY	MAROSANGY	MNJ_SCS2	Spot-check	5	Female	No	No education	Yes	Yes	Yes	No	No	No	No	No	No	No	No	No	No	Negative	NA
FI05255	MANANJARY	MAROSANGY	MNJ_SCS2	Spot-check	NA	NA	No	No education	Yes	Yes	Yes	No	No	Yes	No	No	Yes	No	No	No	Yes	Negative	NA
FI05256	MANANJARY	MAROSANGY	MNJ_SCS2	Spot-check	7	Male	Yes	Primary	Yes	Yes	Yes	No	No	No	No	No	No	No	No	No	No	Negative	NA
FI05257	MANANJARY	MAROSANGY	MNJ_SCS2	Spot-check	6	Male	Yes	Primary	Yes	Yes	Yes	No	No	No	No	No	No	No	No	No	No	Negative	NA
FI05258	MANANJARY	MAROSANGY	MNJ_SCS2	Spot-check	6	Male	Yes	Primary	Yes	Yes	Yes	No	No	No	No	No	No	No	No	No	No	Negative	NA
FI05259	MANANJARY	MAROSANGY	MNJ_SCS2	Spot-check	6	Male	Yes	Primary	Yes	Yes	Yes	No	No	No	No	No	No	No	No	No	No	Negative	NA
FI05260	MANANJARY	MAROSANGY	MNJ_SCS2	Spot-check	22	Female	Yes	Primary	Yes	Yes	Yes	Yes	Yes	Yes	No	No	No	No	No	No	Yes	Negative	NA
FI05261	MANANJARY	MAROSANGY	MNJ_SCS2	Spot-check	6	Female	Yes	Primary	Yes	Yes	Yes	No	No	No	No	No	No	No	No	No	No	Negative	NA
FI05262	MANANJARY	MAROSANGY	MNJ_SCS2	Spot-check	6	Female	Yes	Primary	Yes	Yes	Yes	No	No	No	No	No	No	No	No	No	No	Negative	NA
FI05263	MANANJARY	MAROSANGY	MNJ_SCS2	Spot-check	6	Female	Yes	Primary	Yes	Yes	Yes	No	No	No	No	No	No	No	No	No	No	Negative	NA
FI05264	MANANJARY	MAROSANGY	MNJ_SCS2	Spot-check	6	Female	Yes	Primary	Yes	Yes	Yes	No	No	No	No	No	No	No	No	No	No	Negative	NA
FI05265	MANANJARY	MAROSANGY	MNJ_SCS2	Spot-check	32	Female	No	No education	Yes	Yes	Yes	No	No	Yes	Yes	Yes	Yes	No	No	No	Yes	Negative	NA
FI05266	MANANJARY	MAROSANGY	MNJ_SCS2	Spot-check	6	Male	No	No education	Yes	Yes	Yes	No	No	No	No	No	No	No	No	No	No	Negative	NA
FI05267	MANANJARY	MAROSANGY	MNJ_SCS2	Spot-check	7	Male	Yes	Primary	Yes	Yes	Yes	No	No	No	No	No	No	No	No	No	No	Negative	NA
FI05268	MANANJARY	MAROSANGY	MNJ_SCS2	Spot-check	10	Male	Yes	Primary	Yes	Yes	Yes	No	No	No	No	No	No	No	No	No	No	Negative	NA
FI05269	MANANJARY	MAROSANGY	MNJ_SCS2	Spot-check	8	Male	Yes	Primary	Yes	Yes	Yes	No	No	No	No	No	No	No	No	No	No	Negative	NA
FI05270	MANANJARY	MAROSANGY	MNJ_SCS2	Spot-check	9	Male	Yes	Primary	Yes	Yes	Yes	No	No	No	No	No	No	No	No	No	No	Negative	NA
FI05271	MANANJARY	MAROSANGY	MNJ_SCS2	Spot-check	63	Male	Yes	Primary	Yes	Yes	Yes	No	Yes	Yes	No	No	Yes	No	No	No	Yes	Negative	NA
FI05272	MANANJARY	MAROSANGY	MNJ_SCS2	Spot-check	8	Male	Yes	Primary	Yes	Yes	Yes	No	No	No	No	No	No	No	No	No	No	Negative	NA
FI05273	MANANJARY	MAROSANGY	MNJ_SCS2	Spot-check	6	Male	Yes	Primary	Yes	No	No	No	No	No	No	No	No	No	No	No	No	Negative	NA
FI05274	MANANJARY	MAROSANGY	MNJ_SCS2	Spot-check	8	Male	Yes	Primary	Yes	Yes	Yes	No	No	No	No	No	No	No	No	No	No	Negative	NA
FI05275	MANANJARY	MAROSANGY	MNJ_SCS2	Spot-check	6	Male	Yes	Primary	Yes	Yes	Yes	No	No	No	No	No	No	No	No	No	No	Negative	NA
FI05276	MANANJARY	MAROSANGY	MNJ_SCS2	Spot-check	40	Male	Yes	Primary	No	No	No	Yes	Yes	Yes	Yes	Yes	No	No	No	No	Yes	Negative	NA
FI05277	MANANJARY	MAROSANGY	MNJ_SCS2	Spot-check	6	Female	Yes	Primary	No	No	No	No	No	No	No	No	No	No	No	No	No	Negative	NA
FI05278	MANANJARY	MAROSANGY	MNJ_SCS2	Spot-check	7	Female	Yes	Primary	No	No	No	No	No	No	No	No	No	No	No	No	No	Negative	NA
FI05279	MANANJARY	MAROSANGY	MNJ_SCS2	Spot-check	8	Female	Yes	Primary	No	No	No	No	No	No	No	No	No	No	No	No	No	Negative	NA
FI05280	MANANJARY	MAROSANGY	MNJ_SCS2	Spot-check	10	Female	Yes	Primary	No	No	No	No	No	No	No	No	No	No	No	No	No	Negative	NA
FI05281	MANANJARY	MAROSANGY	MNJ_SCS2	Spot-check	50	Female	Yes	Primary	Yes	Yes	Yes	No	No	Yes	No	No	Yes	No	No	No	Yes	Negative	NA
FI05282	MANANJARY	MAROSANGY	MNJ_SCS2	Spot-check	8	Female	Yes	Primary	Yes	Yes	Yes	Yes	Yes	No	No	No	No	No	No	No	No	Negative	NA
FI05283	MANANJARY	MAROSANGY	MNJ_SCS2	Spot-check	6	Female	Yes	Primary	Yes	Yes	Yes	No	No	No	No	No	No	No	No	No	No	Negative	NA
FI05284	MANANJARY	MAROSANGY	MNJ_SCS2	Spot-check	6	Female	Yes	Primary	Yes	Yes	Yes	No	No	No	No	No	No	No	No	No	No	Negative	NA
FI05285	MANANJARY	MAROSANGY	MNJ_SCS2	Spot-check	6	Female	Yes	Primary	Yes	Yes	Yes	No	No	No	No	No	No	No	No	No	No	Negative	NA
FI05286	MANANJARY	MAROSANGY	MNJ_SCS2	Spot-check	19	Female	Yes	Primary	Yes	Yes	Yes	No	No	No	No	No	No	No	No	No	No	Negative	NA
FI05287	MANANJARY	MAROSANGY	MNJ_SCS2	Spot-check	8	Male	Yes	Primary	Yes	Yes	Yes	No	No	No	No	No	No	No	No	No	No	Negative	NA
FI05288	MANANJARY	MAROSANGY	MNJ_SCS2	Spot-check	8	Male	Yes	Primary	Yes	Yes	Yes	No	No	No	No	No	No	No	No	No	No	Negative	NA
FI05289	MANANJARY	MAROSANGY	MNJ_SCS2	Spot-check	7	Male	Yes	Primary	Yes	Yes	Yes	No	No	No	No	No	No	No	No	No	No	Negative	NA
FI05290	MANANJARY	MAROSANGY	MNJ_SCS2	Spot-check	6	Male	Yes	Primary	Yes	Yes	Yes	No	No	No	No	No	No	No	No	No	No	Negative	NA
FI05291	MANANJARY	MAROSANGY	MNJ_SCS2	Spot-check	60	Male	Yes	Secondary or higher	Yes	Yes	Yes	No	Yes	Yes	No	No	Yes	No	No	No	Yes	Negative	NA
FI05292	MANANJARY	MAROSANGY	MNJ_SCS2	Spot-check	7	Male	Yes	Primary	Yes	Yes	Yes	No	No	No	No	No	No	No	No	No	No	Negative	NA
FI05293	MANANJARY	MAROSANGY	MNJ_SCS2	Spot-check	6	Female	Yes	Primary	Yes	Yes	Yes	No	No	No	No	No	No	No	No	No	No	Negative	NA
FI05294	MANANJARY	MAROSANGY	MNJ_SCS2	Spot-check	7	Female	Yes	Primary	Yes	Yes	Yes	No	No	No	No	No	No	No	No	No	No	Negative	NA
FI05295	MANANJARY	MAROSANGY	MNJ_SCS2	Spot-check	6	Female	Yes	Primary	Yes	Yes	Yes	No	No	No	No	No	No	No	No	No	No	Negative	NA
FI05296	MANANJARY	MAROSANGY	MNJ_SCS2	Spot-check	38	Female	No	No education	Yes	Yes	Yes	No	No	No	No	No	No	No	No	No	No	Negative	NA
FI05297	MANANJARY	MAROSANGY	MNJ_SCS2	Spot-check	8	Female	Yes	Primary	Yes	Yes	Yes	No	No	No	No	No	No	No	No	No	No	Negative	NA
FI05298	MANANJARY	MAROSANGY	MNJ_SCS2	Spot-check	8	Female	Yes	Primary	Yes	Yes	Yes	No	No	No	No	No	No	No	No	No	No	Negative	NA
FI05299	MANANJARY	MAROSANGY	MNJ_SCS2	Spot-check	7	Female	Yes	Primary	Yes	Yes	Yes	No	No	No	No	No	No	No	No	No	No	Negative	NA
FI05300	MANANJARY	MAROSANGY	MNJ_SCS2	Spot-check	6	Female	Yes	Primary	Yes	Yes	Yes	No	No	No	No	No	No	No	No	No	No	Negative	NA
FI05301	MANANJARY	MAROSANGY	MNJ_SCS2	Spot-check	28	Female	Yes	Primary	Yes	Yes	Yes	No	Yes	Yes	No	No	Yes	No	No	No	Yes	Negative	NA
FI05302	MANANJARY	MAROSANGY	MNJ_SCS2	Spot-check	6	Female	Yes	Primary	Yes	Yes	Yes	No	No	No	No	No	No	No	No	No	No	Negative	NA
FI05303	MANANJARY	MAROSANGY	MNJ_SCS2	Spot-check	6	Female	Yes	Primary	No	No	No	No	No	No	No	No	No	No	No	No	No	Negative	NA
FI05304	MANANJARY	MAROSANGY	MNJ_SCS2	Spot-check	6	Female	Yes	Primary	Yes	Yes	Yes	No	No	No	No	No	No	No	No	No	No	Negative	NA
FI05305	MANANJARY	MAROSANGY	MNJ_SCS2	Spot-check	6	Female	Yes	Primary	Yes	Yes	Yes	No	No	No	No	No	No	No	No	No	No	Negative	NA
FI05306	MANANJARY	MAROSANGY	MNJ_SCS2	Spot-check	27	Female	Yes	Secondary or higher	Yes	Yes	Yes	No	No	Yes	No	No	Yes	Yes	No	No	Yes	Negative	NA
FI05307	MANANJARY	MAROSANGY	MNJ_SCS2	Spot-check	8	Female	Yes	Primary	Yes	Yes	Yes	No	No	No	No	No	No	No	No	No	No	Negative	NA
FI05308	MANANJARY	MAROSANGY	MNJ_SCS2	Spot-check	8	Female	Yes	Primary	Yes	Yes	Yes	No	No	No	No	No	No	No	No	No	No	Negative	NA
FI05309	MANANJARY	MAROSANGY	MNJ_SCS2	Spot-check	6	Female	Yes	Primary	Yes	Yes	Yes	No	No	No	No	No	No	No	No	No	No	Negative	NA
FI05310	MANANJARY	MAROSANGY	MNJ_SCS2	Spot-check	60	Female	Yes	Primary	No	No	No	No	No	Yes	No	Yes	Yes	No	No	No	Yes	Negative	NA
FI05311	MANANJARY	MAROSANGY	MNJ_SCS2	Spot-check	6	Female	Yes	Primary	No	No	No	No	No	No	No	No	No	No	No	No	No	Negative	NA
FI05312	MANANJARY	MAROSANGY	MNJ_SCS2	Spot-check	9	Male	Yes	Primary	No	No	No	No	No	No	No	No	No	No	No	No	No	Negative	NA
FI05313	MANANJARY	MAROSANGY	MNJ_SCS2	Spot-check	5	Female	Yes	Primary	Yes	Yes	Yes	No	No	No	No	No	No	No	No	No	No	Negative	NA
FI05314	MANANJARY	MAROSANGY	MNJ_SCS2	Spot-check	7	Male	Yes	Primary	Yes	Yes	Yes	No	No	No	No	No	No	No	No	No	No	Negative	NA
FI05315	MANANJARY	MAROSANGY	MNJ_SCS2	Spot-check	6	Male	Yes	Primary	No	No	No	No	No	No	No	No	No	No	No	No	No	Negative	NA
FI05316	MANANJARY	MAROSANGY	MNJ_SCS2	Spot-check	63	Male	Yes	Primary	Yes	Yes	Yes	Yes	Yes	Yes	No	No	No	No	No	No	Yes	Negative	NA
FI05317	MANANJARY	MAROSANGY	MNJ_SCS2	Spot-check	8	Female	Yes	Primary	Yes	Yes	Yes	Yes	Yes	No	No	No	No	No	No	No	No	Negative	NA
FI05318	MANANJARY	MAROSANGY	MNJ_SCS2	Spot-check	9	Male	Yes	Primary	Yes	Yes	Yes	Yes	Yes	No	No	No	No	No	No	No	No	Negative	NA
FI05319	MANANJARY	MAROSANGY	MNJ_SCS2	Spot-check	6	Male	Yes	Primary	Yes	Yes	Yes	Yes	Yes	No	No	No	No	No	No	No	No	Negative	NA
FI05320	MANANJARY	MAROSANGY	MNJ_SCS2	Spot-check	5	Female	Yes	Primary	Yes	Yes	Yes	No	No	No	No	No	No	No	No	No	No	Negative	NA
FI05321	MANANJARY	MAROSANGY	MNJ_SCS2	Spot-check	38	Female	No	No education	No	No	No	No	No	No	No	No	No	No	No	No	No	Negative	NA
FI05322	MANANJARY	MAROSANGY	MNJ_SCS2	Spot-check	6	Female	Yes	Primary	No	No	No	No	No	No	No	No	No	No	No	No	No	Negative	NA
FI05323	MANANJARY	MAROSANGY	MNJ_SCS2	Spot-check	8	Female	Yes	Primary	Yes	Yes	Yes	No	No	No	No	No	No	No	No	No	No	Negative	NA
FI05324	MANANJARY	MAROSANGY	MNJ_SCS2	Spot-check	6	Male	Yes	Primary	No	No	No	No	No	No	No	No	No	No	No	No	No	Negative	NA
FI05325	MANANJARY	MAROSANGY	MNJ_SCS2	Spot-check	6	Male	Yes	Primary	Yes	Yes	Yes	No	No	No	No	No	No	No	No	No	No	Negative	NA
FI05326	MANANJARY	MAROSANGY	MNJ_SCS2	Spot-check	38	Female	Yes	Primary	Yes	Yes	Yes	No	No	No	No	No	No	No	No	No	No	Negative	NA
FI05327	MANANJARY	MAROSANGY	MNJ_SCS2	Spot-check	9	Male	Yes	Primary	Yes	Yes	Yes	No	No	No	No	No	No	No	No	No	No	Negative	NA
FI05328	MANANJARY	MAROSANGY	MNJ_SCS2	Spot-check	7	Female	Yes	Primary	No	No	No	No	No	No	No	No	No	No	No	No	No	Negative	NA
FI05329	MANANJARY	MAROSANGY	MNJ_SCS2	Spot-check	7	Male	Yes	Primary	No	No	No	No	No	No	No	No	No	No	No	No	No	Negative	NA
FI05330	MANANJARY	MAROSANGY	MNJ_SCS2	Spot-check	6	Female	Yes	Primary	Yes	Yes	Yes	No	No	No	No	No	No	No	No	No	No	Negative	NA
FI05331	MANANJARY	MAROSANGY	MNJ_SCS2	Spot-check	52	Female	Yes	Primary	Yes	Yes	Yes	Yes	Yes	Yes	No	No	No	No	No	No	Yes	Negative	NA
FI05332	MANANJARY	MAROSANGY	MNJ_SCS2	Spot-check	10	Female	Yes	Primary	Yes	Yes	Yes	Yes	Yes	No	No	No	No	No	No	No	No	Negative	NA
FI05333	MANANJARY	MAROSANGY	MNJ_SCS2	Spot-check	7	Female	Yes	Primary	Yes	Yes	Yes	Yes	Yes	No	No	No	No	No	No	No	No	Negative	NA
FI05334	MANANJARY	MAROSANGY	MNJ_SCS2	Spot-check	7	Female	Yes	Primary	Yes	Yes	Yes	Yes	Yes	No	No	No	No	No	No	No	No	Negative	NA
FI05335	MANANJARY	MAROSANGY	MNJ_SCS2	Spot-check	6	Female	Yes	Primary	Yes	Yes	Yes	Yes	Yes	No	No	No	No	No	No	No	No	Negative	NA
FI05336	MANANJARY	MAROSANGY	MNJ_SCS2	Spot-check	45	Female	Yes	Primary	Yes	Yes	Yes	No	No	No	No	No	No	No	No	No	No	Negative	NA
FI05337	MANANJARY	MAROSANGY	MNJ_SCS2	Spot-check	9	Female	Yes	Primary	Yes	Yes	Yes	No	No	No	No	No	No	No	No	No	No	Negative	NA
FI05338	MANANJARY	MAROSANGY	MNJ_SCS2	Spot-check	8	Female	Yes	Primary	Yes	Yes	Yes	No	No	No	No	No	No	No	No	No	No	Negative	NA
FI05339	MANANJARY	MAROSANGY	MNJ_SCS2	Spot-check	8	Female	Yes	Primary	No	No	No	No	No	No	No	No	No	No	No	No	No	Negative	NA
FI05340	MANANJARY	MAROSANGY	MNJ_SCS2	Spot-check	7	Male	Yes	Primary	Yes	Yes	Yes	No	No	No	No	No	No	No	No	No	No	Negative	NA
FI05341	MANANJARY	MAROSANGY	MNJ_SCS2	Spot-check	41	Male	Yes	Primary	No	No	No	No	No	Yes	No	No	Yes	No	No	No	No	Negative	NA
FI05342	MANANJARY	MAROSANGY	MNJ_SCS2	Spot-check	9	Female	Yes	Primary	Yes	Yes	Yes	Yes	Yes	No	No	No	No	No	No	No	No	Negative	NA
FI05343	MANANJARY	MAROSANGY	MNJ_SCS2	Spot-check	9	Female	Yes	Primary	Yes	Yes	Yes	Yes	Yes	No	No	No	No	No	No	No	No	Negative	NA
FI05344	MANANJARY	MAROSANGY	MNJ_SCS2	Spot-check	8	Female	Yes	Primary	Yes	Yes	Yes	Yes	Yes	No	No	No	No	No	No	No	No	Negative	NA
FI05345	MANANJARY	MAROSANGY	MNJ_SCS2	Spot-check	7	Female	Yes	Primary	Yes	Yes	Yes	Yes	Yes	No	No	No	No	No	No	No	No	Negative	NA
FI05346	MANANJARY	MAROSANGY	MNJ_SCS2	Spot-check	51	Female	Yes	Primary	Yes	Yes	Yes	No	No	Yes	No	No	Yes	No	No	No	Yes	Negative	NA
FI05347	MANANJARY	MAROSANGY	MNJ_SCS2	Spot-check	10	Male	Yes	Primary	Yes	Yes	Yes	No	No	No	No	No	No	No	No	No	No	Negative	NA
FI05348	MANANJARY	MAROSANGY	MNJ_SCS2	Spot-check	8	Male	Yes	Primary	Yes	Yes	Yes	No	No	No	No	No	No	No	No	No	No	Negative	NA
FI05349	MANANJARY	MAROSANGY	MNJ_SCS2	Spot-check	8	Male	Yes	Primary	Yes	Yes	Yes	No	No	No	No	No	No	No	No	No	No	Negative	NA
FI05350	MANANJARY	MAROSANGY	MNJ_SCS2	Spot-check	9	Male	Yes	Primary	Yes	Yes	Yes	No	No	No	No	No	No	No	No	No	No	Negative	NA
FI05351	MANANJARY	MAROSANGY	MNJ_SCS2	Spot-check	NA	Female	Yes	Primary	Yes	Yes	Yes	No	No	Yes	No	No	Yes	Yes	No	No	Yes	Negative	NA
FI05352	MANANJARY	MAROSANGY	MNJ_SCS2	Spot-check	9	Male	Yes	Primary	Yes	Yes	Yes	No	No	No	No	No	No	No	No	No	No	Negative	NA
FI05353	MANANJARY	MAROSANGY	MNJ_SCS2	Spot-check	8	Male	Yes	Primary	Yes	Yes	Yes	No	No	No	No	No	No	No	No	No	No	Negative	NA
FI05354	MANANJARY	MAROSANGY	MNJ_SCS2	Spot-check	8	Male	Yes	Primary	Yes	Yes	Yes	Yes	Yes	No	No	No	No	No	No	No	No	Negative	NA
FI05355	MANANJARY	MAROSANGY	MNJ_SCS2	Spot-check	7	Male	Yes	Primary	Yes	Yes	Yes	Yes	Yes	No	No	No	No	No	No	No	No	Negative	NA
FI05356	MANANJARY	MAROSANGY	MNJ_SCS2	Spot-check	45	Female	Yes	Primary	Yes	Yes	Yes	No	Yes	Yes	No	Yes	Yes	No	No	No	Yes	Negative	NA
FI05357	MANANJARY	MAROSANGY	MNJ_SCS2	Spot-check	9	Male	Yes	Primary	Yes	Yes	Yes	No	No	No	No	No	No	No	No	No	No	Negative	NA
FI05358	MANANJARY	MAROSANGY	MNJ_SCS2	Spot-check	6	Male	Yes	Primary	Yes	Yes	Yes	No	No	No	No	No	No	No	No	No	No	Negative	NA
FI05359	MANANJARY	MAROSANGY	MNJ_SCS2	Spot-check	8	Male	Yes	Primary	Yes	Yes	Yes	No	No	No	No	No	No	No	No	No	No	Negative	NA
FI05360	MANANJARY	MAROSANGY	MNJ_SCS2	Spot-check	9	Male	Yes	Primary	Yes	Yes	Yes	No	No	No	No	No	No	No	No	No	No	Negative	NA
FI05361	MANANJARY	MAROSANGY	MNJ_SCS2	Spot-check	27	Female	No	No education	Yes	Yes	Yes	Yes	Yes	Yes	No	No	No	No	No	No	No	Negative	NA
FI05362	MANANJARY	MAROSANGY	MNJ_SCS2	Spot-check	10	Female	Yes	Primary	Yes	Yes	Yes	Yes	Yes	No	No	No	No	No	No	No	No	Negative	NA
FI05363	MANANJARY	MAROSANGY	MNJ_SCS2	Spot-check	7	Female	Yes	Primary	Yes	Yes	Yes	Yes	Yes	No	No	No	No	No	No	No	No	Negative	NA
FI05364	MANANJARY	MAROSANGY	MNJ_SCS2	Spot-check	7	Female	Yes	Primary	Yes	Yes	Yes	Yes	Yes	No	No	No	No	No	No	No	No	Negative	NA
FI05365	MANANJARY	MAROSANGY	MNJ_SCS2	Spot-check	7	Female	Yes	Primary	Yes	Yes	Yes	Yes	Yes	No	No	No	No	No	No	No	No	Negative	NA
FI05366	MANANJARY	MAROSANGY	MNJ_SCS2	Spot-check	18	Male	Yes	Secondary or higher	Yes	Yes	Yes	No	No	Yes	No	Yes	Yes	No	No	No	Yes	Negative	NA
FI05367	MANANJARY	MAROSANGY	MNJ_SCS2	Spot-check	9	Male	Yes	Primary	Yes	Yes	Yes	No	No	No	No	No	No	No	No	No	No	Negative	NA
FI05368	MANANJARY	MAROSANGY	MNJ_SCS2	Spot-check	10	Male	Yes	Primary	Yes	Yes	Yes	No	No	No	No	No	No	No	No	No	No	Negative	NA
FI05369	MANANJARY	MAROSANGY	MNJ_SCS2	Spot-check	8	Female	Yes	Primary	Yes	Yes	Yes	No	No	No	No	No	No	No	No	No	No	Negative	NA
FI05370	MANANJARY	MAROSANGY	MNJ_SCS2	Spot-check	9	Male	Yes	Primary	Yes	Yes	Yes	No	No	No	No	No	No	No	No	No	No	Negative	NA
FI05371	MANANJARY	MAROSANGY	MNJ_SCS2	Spot-check	28	Male	Yes	Primary	Yes	Yes	Yes	Yes	Yes	Yes	No	No	Yes	No	Yes	No	Yes	Negative	NA
FI05372	MANANJARY	MAROSANGY	MNJ_SCS2	Spot-check	20	Male	Yes	Primary	Yes	Yes	Yes	Yes	Yes	No	No	No	No	No	No	No	No	Negative	NA
FI05373	MANANJARY	MAROSANGY	MNJ_SCS2	Spot-check	9	Male	Yes	Primary	Yes	Yes	Yes	Yes	Yes	No	No	No	No	No	No	No	No	Negative	NA
FI05374	MANANJARY	MAROSANGY	MNJ_SCS2	Spot-check	7	Male	Yes	Primary	Yes	Yes	Yes	Yes	Yes	No	No	No	No	No	No	No	No	Negative	NA
FI05375	MANANJARY	MAROSANGY	MNJ_SCS2	Spot-check	7	Female	Yes	Primary	Yes	Yes	Yes	Yes	Yes	No	No	No	No	No	No	No	No	Negative	NA
FI05376	MANANJARY	MAROSANGY	MNJ_SCS2	Spot-check	19	Female	Yes	Secondary or higher	Yes	Yes	Yes	No	Yes	Yes	No	Yes	Yes	No	No	No	Yes	Negative	NA
FI05377	MANANJARY	MAROSANGY	MNJ_SCS2	Spot-check	9	Female	Yes	Primary	Yes	Yes	Yes	No	No	No	No	No	No	No	No	No	No	Negative	NA
FI05378	MANANJARY	MAROSANGY	MNJ_SCS2	Spot-check	10	Male	Yes	Primary	Yes	Yes	Yes	No	No	No	No	No	No	No	No	No	No	Negative	NA
FI05379	MANANJARY	MAROSANGY	MNJ_SCS2	Spot-check	9	Male	Yes	Primary	Yes	Yes	Yes	No	No	No	No	No	No	No	No	No	No	Negative	NA
FI05380	MANANJARY	MAROSANGY	MNJ_SCS2	Spot-check	9	Female	Yes	Primary	Yes	Yes	Yes	No	No	No	No	No	No	No	No	No	No	Negative	NA
FI05381	MANANJARY	MAROSANGY	MNJ_SCS2	Spot-check	52	Female	Yes	Secondary or higher	Yes	Yes	Yes	Yes	Yes	Yes	Yes	No	Yes	Yes	No	Yes	Yes	Negative	NA
FI05382	MANANJARY	MAROSANGY	MNJ_SCS2	Spot-check	12	Female	Yes	Primary	No	No	No	Yes	Yes	No	No	No	No	No	No	No	No	Negative	NA
FI05383	MANANJARY	MAROSANGY	MNJ_SCS2	Spot-check	9	Female	Yes	Primary	Yes	Yes	Yes	Yes	Yes	No	No	No	No	No	No	No	No	Negative	NA
FI05384	MANANJARY	MAROSANGY	MNJ_SCS2	Spot-check	9	Female	Yes	Primary	Yes	Yes	Yes	Yes	Yes	No	No	No	No	No	No	No	No	Negative	NA
FI05385	MANANJARY	MAROSANGY	MNJ_SCS2	Spot-check	8	Male	Yes	Primary	Yes	Yes	Yes	Yes	Yes	No	No	No	No	No	No	No	No	Negative	NA
FI05386	MANANJARY	MAROSANGY	MNJ_SCS2	Spot-check	68	Female	Yes	Secondary or higher	Yes	Yes	Yes	No	Yes	Yes	No	Yes	Yes	No	No	No	Yes	Negative	NA
FI05387	MANANJARY	MAROSANGY	MNJ_SCS2	Spot-check	11	Female	Yes	Primary	Yes	Yes	Yes	No	No	No	No	No	No	No	No	No	No	Negative	NA
FI05388	MANANJARY	MAROSANGY	MNJ_SCS2	Spot-check	9	Female	Yes	Primary	Yes	Yes	Yes	No	Yes	No	No	No	No	No	No	No	No	Negative	NA
FI05389	MANANJARY	MAROSANGY	MNJ_SCS2	Spot-check	8	Male	Yes	Primary	Yes	Yes	Yes	No	No	No	No	No	No	No	No	No	No	Negative	NA
FI05390	MANANJARY	MAROSANGY	MNJ_SCS2	Spot-check	12	Male	Yes	Primary	Yes	Yes	Yes	No	No	No	No	No	No	No	No	No	No	Negative	NA
FI05391	MANANJARY	MAROSANGY	MNJ_SCS2	Spot-check	19	Female	No	No education	Yes	No	Yes	No	No	No	No	No	No	No	No	No	No	Negative	NA
FI05392	MANANJARY	MAROSANGY	MNJ_SCS2	Spot-check	12	Male	Yes	Primary	Yes	Yes	Yes	No	No	No	No	No	No	No	No	No	No	Negative	NA
FI05393	MANANJARY	MAROSANGY	MNJ_SCS2	Spot-check	8	Female	Yes	Primary	Yes	Yes	Yes	No	No	No	No	No	No	No	No	No	No	Negative	NA
FI05394	MANANJARY	MAROSANGY	MNJ_SCS2	Spot-check	7	Female	Yes	Primary	Yes	Yes	Yes	No	No	No	No	No	No	No	No	No	No	Negative	NA
FI05395	MANANJARY	MAROSANGY	MNJ_SCS2	Spot-check	9	Male	Yes	Primary	Yes	Yes	Yes	No	No	No	No	No	No	No	No	No	No	Negative	NA
FI05396	MANANJARY	MAROSANGY	MNJ_SCS2	Spot-check	18	Female	Yes	Primary	No	No	No	No	No	No	No	No	No	No	No	No	No	Negative	NA
FI05397	MANANJARY	MAROSANGY	MNJ_SCS2	Spot-check	11	Female	Yes	Primary	Yes	Yes	Yes	Yes	Yes	No	No	No	No	No	No	No	No	Negative	NA
FI05398	MANANJARY	MAROSANGY	MNJ_SCS2	Spot-check	10	Female	Yes	Primary	Yes	Yes	Yes	Yes	Yes	No	No	No	No	No	No	No	No	Negative	NA
FI05399	MANANJARY	MAROSANGY	MNJ_SCS2	Spot-check	9	Male	Yes	Primary	Yes	Yes	Yes	Yes	Yes	No	No	No	No	No	No	No	No	Negative	NA
FI05400	MANANJARY	MAROSANGY	MNJ_SCS2	Spot-check	8	Male	Yes	Primary	Yes	Yes	Yes	Yes	Yes	No	No	No	No	No	No	No	No	Negative	NA
FI05401	MANANJARY	TSIATOSIKA	MNJ_SS	Sentinel	48	Female	Yes	Secondary or higher	Yes	Yes	Yes	Yes	Yes	Yes	No	Yes	Yes	No	No	No	Yes	Negative	NA
FI05402	MANANJARY	TSIATOSIKA	MNJ_SS	Sentinel	19	Female	Yes	Primary	Yes	Yes	Yes	No	Yes	No	No	No	No	No	No	No	No	Negative	NA
FI05403	MANANJARY	TSIATOSIKA	MNJ_SS	Sentinel	25	Female	Yes	Primary	Yes	Yes	Yes	Yes	Yes	No	No	No	No	No	No	No	No	Negative	NA
FI05404	MANANJARY	TSIATOSIKA	MNJ_SS	Sentinel	17	Female	Yes	Primary	Yes	Yes	Yes	Yes	Yes	No	No	No	No	No	No	No	No	Negative	NA
FI05405	MANANJARY	TSIATOSIKA	MNJ_SS	Sentinel	35	Male	Yes	Primary	Yes	Yes	Yes	Yes	Yes	Yes	No	Yes	Yes	No	No	No	Yes	Negative	NA
FI05406	MANANJARY	TSIATOSIKA	MNJ_SS	Sentinel	15	Female	Yes	Primary	No	No	No	No	No	Yes	No	No	Yes	No	No	No	No	Negative	NA
FI05407	MANANJARY	TSIATOSIKA	MNJ_SS	Sentinel	10	Female	Yes	Primary	No	No	No	No	No	No	No	No	No	No	No	No	No	Negative	NA
FI05408	MANANJARY	TSIATOSIKA	MNJ_SS	Sentinel	56	Male	Yes	Primary	Yes	Yes	Yes	No	Yes	Yes	No	Yes	Yes	No	No	No	Yes	Negative	NA
FI05409	MANANJARY	TSIATOSIKA	MNJ_SS	Sentinel	30	Female	Yes	Primary	Yes	Yes	Yes	No	No	Yes	No	Yes	Yes	No	No	No	Yes	Negative	NA
FI05410	MANANJARY	TSIATOSIKA	MNJ_SS	Sentinel	26	Female	No	No education	No	No	No	No	No	No	No	No	No	No	No	No	No	Negative	NA
FI05411	MANANJARY	TSIATOSIKA	MNJ_SS	Sentinel	44	Female	No	No education	Yes	Yes	Yes	No	No	Yes	Yes	Yes	Yes	No	No	No	Yes	Negative	NA
FI05412	MANANJARY	TSIATOSIKA	MNJ_SS	Sentinel	20	Female	No	No education	Yes	Yes	Yes	No	No	Yes	Yes	Yes	No	No	No	No	Yes	Negative	NA
FI05413	MANANJARY	TSIATOSIKA	MNJ_SS	Sentinel	23	Female	Yes	Primary	Yes	Yes	Yes	Yes	Yes	Yes	Yes	Yes	Yes	No	No	No	Yes	Negative	NA
FI05414	MANANJARY	TSIATOSIKA	MNJ_SS	Sentinel	26	Female	Yes	Primary	Yes	Yes	Yes	Yes	Yes	Yes	No	Yes	Yes	No	No	No	Yes	Negative	NA
FI05415	MANANJARY	TSIATOSIKA	MNJ_SS	Sentinel	5	Male	Yes	Primary	Yes	Yes	Yes	No	No	No	No	No	No	No	No	No	No	Negative	NA
FI05416	MANANJARY	TSIATOSIKA	MNJ_SS	Sentinel	22	Female	Yes	Primary	Yes	Yes	Yes	No	No	Yes	Yes	Yes	Yes	No	No	No	Yes	Negative	NA
FI05417	MANANJARY	TSIATOSIKA	MNJ_SS	Sentinel	20	Female	Yes	Primary	Yes	Yes	Yes	Yes	Yes	Yes	No	No	Yes	No	No	No	Yes	Negative	NA
FI05418	MANANJARY	TSIATOSIKA	MNJ_SS	Sentinel	16	Female	Yes	Primary	Yes	Yes	Yes	Yes	Yes	Yes	No	No	Yes	No	No	No	Yes	Negative	NA
FI05419	MANANJARY	TSIATOSIKA	MNJ_SS	Sentinel	12	Male	Yes	Primary	Yes	Yes	Yes	Yes	Yes	No	No	No	No	No	No	No	No	Negative	NA
FI05420	MANANJARY	TSIATOSIKA	MNJ_SS	Sentinel	32	Male	Yes	Primary	Yes	Yes	Yes	Yes	No	Yes	Yes	Yes	Yes	No	No	No	Yes	Negative	NA
FI05421	MANANJARY	TSIATOSIKA	MNJ_SS	Sentinel	30	Female	No	No education	Yes	Yes	Yes	No	No	No	No	No	No	No	No	No	No	Negative	NA
FI05422	MANANJARY	TSIATOSIKA	MNJ_SS	Sentinel	18	Female	No	No education	No	No	No	No	No	Yes	Yes	Yes	Yes	No	No	No	Yes	Negative	NA
FI05423	MANANJARY	TSIATOSIKA	MNJ_SS	Sentinel	11	Male	Yes	Primary	No	No	No	No	No	No	No	No	No	No	No	No	No	Negative	NA
FI05424	MANANJARY	TSIATOSIKA	MNJ_SS	Sentinel	58	Male	Yes	Primary	Yes	Yes	Yes	Yes	Yes	Yes	Yes	Yes	Yes	No	No	No	Yes	Negative	NA
FI05425	MANANJARY	TSIATOSIKA	MNJ_SS	Sentinel	52	Female	Yes	Primary	Yes	Yes	Yes	No	Yes	Yes	Yes	Yes	Yes	No	No	No	Yes	Negative	NA
FI05426	MANANJARY	TSIATOSIKA	MNJ_SS	Sentinel	25	Male	Yes	Secondary or higher	Yes	Yes	Yes	Yes	Yes	Yes	Yes	Yes	Yes	No	No	No	Yes	Negative	NA
FI05427	MANANJARY	TSIATOSIKA	MNJ_SS	Sentinel	25	Female	Yes	Primary	Yes	Yes	Yes	No	Yes	Yes	Yes	No	No	No	No	No	Yes	Negative	NA
FI05428	MANANJARY	TSIATOSIKA	MNJ_SS	Sentinel	18	Female	Yes	Primary	Yes	Yes	Yes	No	No	No	No	No	No	No	No	No	No	Negative	NA
FI05429	MANANJARY	TSIATOSIKA	MNJ_SS	Sentinel	42	Female	Yes	Secondary or higher	Yes	Yes	Yes	No	Yes	Yes	Yes	No	No	No	No	No	Yes	Negative	NA
FI05430	MANANJARY	TSIATOSIKA	MNJ_SS	Sentinel	60	Male	Yes	Primary	No	No	No	No	Yes	No	No	No	No	No	No	No	No	Negative	NA
FI05431	MANANJARY	TSIATOSIKA	MNJ_SS	Sentinel	31	Male	Yes	Primary	Yes	Yes	Yes	Yes	Yes	Yes	No	No	Yes	No	No	No	Yes	Negative	NA
FI05432	MANANJARY	TSIATOSIKA	MNJ_SS	Sentinel	76	Female	Yes	Primary	Yes	Yes	Yes	Yes	Yes	Yes	No	Yes	Yes	No	No	No	Yes	Negative	NA
FI05433	MANANJARY	TSIATOSIKA	MNJ_SS	Sentinel	58	Male	Yes	Primary	Yes	Yes	Yes	No	Yes	Yes	No	Yes	Yes	No	No	No	Yes	Negative	NA
FI05434	MANANJARY	TSIATOSIKA	MNJ_SS	Sentinel	12	Male	Yes	Primary	Yes	Yes	Yes	No	Yes	No	No	No	No	No	No	No	No	Negative	NA
FI05435	MANANJARY	TSIATOSIKA	MNJ_SS	Sentinel	25	Male	Yes	Primary	No	No	No	No	No	Yes	No	No	Yes	No	No	No	Yes	Negative	NA
FI05436	MANANJARY	TSIATOSIKA	MNJ_SS	Sentinel	30	Male	Yes	Primary	No	No	No	Yes	Yes	Yes	No	No	Yes	No	No	No	No	Negative	NA
FI05437	MANANJARY	TSIATOSIKA	MNJ_SS	Sentinel	30	Male	Yes	Primary	Yes	Yes	No	No	Yes	Yes	No	Yes	Yes	No	No	No	Yes	Negative	NA
FI05438	MANANJARY	TSIATOSIKA	MNJ_SS	Sentinel	38	Male	Yes	Primary	No	No	No	Yes	Yes	No	No	No	No	No	No	No	No	Negative	NA
FI05439	MANANJARY	TSIATOSIKA	MNJ_SS	Sentinel	47	Female	No	No education	Yes	Yes	Yes	No	Yes	Yes	No	Yes	No	No	No	No	Yes	Negative	NA
FI05440	MANANJARY	TSIATOSIKA	MNJ_SS	Sentinel	50	Male	Yes	Secondary or higher	Yes	Yes	Yes	No	Yes	Yes	No	No	Yes	No	No	No	Yes	Positive	Negative
FI05441	MANANJARY	TSIATOSIKA	MNJ_SS	Sentinel	65	Female	Yes	Primary	Yes	Yes	Yes	Yes	Yes	Yes	No	Yes	Yes	No	No	No	Yes	Negative	NA
FI05442	MANANJARY	TSIATOSIKA	MNJ_SS	Sentinel	34	Male	No	No education	Yes	Yes	Yes	No	Yes	No	No	No	No	No	No	No	No	Negative	NA
FI05443	MANANJARY	TSIATOSIKA	MNJ_SS	Sentinel	14	Male	No	No education	Yes	Yes	Yes	No	Yes	No	No	No	No	No	No	No	No	Negative	NA
FI05444	MANANJARY	TSIATOSIKA	MNJ_SS	Sentinel	NA	Male	Yes	Primary	Yes	Yes	Yes	Yes	Yes	No	No	No	No	No	No	No	No	Negative	NA
FI05445	MANANJARY	TSIATOSIKA	MNJ_SS	Sentinel	25	Female	No	No education	Yes	Yes	Yes	Yes	Yes	No	No	No	No	No	No	No	No	Negative	NA
FI05446	MANANJARY	TSIATOSIKA	MNJ_SS	Sentinel	20	Female	No	No education	Yes	Yes	Yes	No	Yes	Yes	No	Yes	No	No	No	No	Yes	Negative	NA
FI05447	MANANJARY	TSIATOSIKA	MNJ_SS	Sentinel	45	Female	No	No education	Yes	Yes	Yes	No	Yes	Yes	No	Yes	Yes	No	No	No	Yes	Negative	NA
FI05448	MANANJARY	TSIATOSIKA	MNJ_SS	Sentinel	5	Female	Yes	Primary	Yes	Yes	Yes	No	No	No	No	No	No	No	No	No	No	Negative	NA
FI05449	MANANJARY	TSIATOSIKA	MNJ_SS	Sentinel	21	Female	Yes	Primary	Yes	Yes	Yes	No	No	Yes	Yes	Yes	No	No	No	No	Yes	Negative	NA
FI05450	MANANJARY	TSIATOSIKA	MNJ_SS	Sentinel	15	Female	Yes	Primary	Yes	Yes	Yes	No	No	Yes	Yes	Yes	No	No	No	No	Yes	Negative	NA
FI05451	MANANJARY	TSIATOSIKA	MNJ_SS	Sentinel	30	Female	Yes	Primary	Yes	Yes	Yes	Yes	Yes	No	No	No	No	No	No	No	No	Negative	NA
FI05452	MANANJARY	TSIATOSIKA	MNJ_SS	Sentinel	16	Female	Yes	Primary	Yes	Yes	Yes	Yes	Yes	No	No	No	No	No	No	No	No	Negative	NA
FI05453	MANANJARY	TSIATOSIKA	MNJ_SS	Sentinel	26	Female	Yes	Primary	Yes	Yes	Yes	No	No	Yes	Yes	Yes	No	No	No	No	Yes	Negative	NA
FI05454	MANANJARY	TSIATOSIKA	MNJ_SS	Sentinel	18	Female	Yes	Primary	Yes	Yes	Yes	No	No	Yes	Yes	Yes	Yes	No	No	No	Yes	Negative	NA
FI05455	MANANJARY	TSIATOSIKA	MNJ_SS	Sentinel	20	Female	Yes	Primary	Yes	Yes	Yes	No	Yes	No	No	No	No	No	No	No	No	Negative	NA
FI05456	MANANJARY	TSIATOSIKA	MNJ_SS	Sentinel	6	Male	No	No education	Yes	Yes	Yes	No	No	No	No	No	No	No	No	No	No	Negative	NA
FI05457	MANANJARY	TSIATOSIKA	MNJ_SS	Sentinel	18	Female	Yes	Primary	Yes	Yes	Yes	No	Yes	Yes	No	No	Yes	No	No	No	Yes	Negative	NA
FI05458	MANANJARY	TSIATOSIKA	MNJ_SS	Sentinel	60	Female	Yes	Primary	Yes	Yes	Yes	Yes	No	No	No	No	No	No	No	No	No	Negative	NA
FI05459	MANANJARY	TSIATOSIKA	MNJ_SS	Sentinel	45	Male	Yes	Primary	Yes	Yes	Yes	No	No	Yes	Yes	Yes	No	No	No	No	Yes	Negative	NA
FI05460	MANANJARY	TSIATOSIKA	MNJ_SS	Sentinel	41	Female	NA	NA	Yes	Yes	Yes	No	Yes	Yes	No	No	Yes	No	No	No	Yes	Negative	NA
FI05461	MANANJARY	TSIATOSIKA	MNJ_SS	Sentinel	30	Male	Yes	Primary	Yes	Yes	Yes	No	No	Yes	Yes	Yes	No	No	No	No	Yes	Negative	NA
FI05462	MANANJARY	TSIATOSIKA	MNJ_SS	Sentinel	25	Female	Yes	Primary	Yes	Yes	Yes	No	Yes	Yes	No	No	Yes	No	No	No	Yes	Negative	NA
FI05463	MANANJARY	TSIATOSIKA	MNJ_SS	Sentinel	48	Male	No	No education	Yes	Yes	Yes	No	Yes	Yes	No	No	Yes	No	No	No	Yes	Negative	NA
FI05464	MANANJARY	TSIATOSIKA	MNJ_SS	Sentinel	37	Female	Yes	Primary	Yes	Yes	Yes	No	No	Yes	Yes	Yes	No	No	No	No	Yes	Negative	NA
FI05465	MANANJARY	TSIATOSIKA	MNJ_SS	Sentinel	13	Female	Yes	Primary	Yes	Yes	Yes	No	No	No	No	No	No	No	No	No	No	Negative	NA
FI05466	MANANJARY	TSIATOSIKA	MNJ_SS	Sentinel	33	Male	No	No education	No	No	No	No	Yes	No	No	No	No	No	No	No	No	Negative	NA
FI05467	MANANJARY	TSIATOSIKA	MNJ_SS	Sentinel	18	Male	Yes	Primary	Yes	Yes	Yes	No	No	Yes	Yes	Yes	No	No	No	No	Yes	Negative	NA
FI05468	MANANJARY	TSIATOSIKA	MNJ_SS	Sentinel	30	Female	No	No education	Yes	Yes	Yes	No	No	Yes	No	Yes	No	No	No	No	Yes	Negative	NA
FI05469	MANANJARY	TSIATOSIKA	MNJ_SS	Sentinel	8	Male	Yes	Primary	Yes	Yes	Yes	No	No	No	No	No	No	No	No	No	No	Negative	NA
FI05470	MANANJARY	TSIATOSIKA	MNJ_SS	Sentinel	35	Female	No	No education	Yes	Yes	Yes	No	Yes	No	No	No	No	No	No	No	No	Negative	NA
FI05471	MANANJARY	TSIATOSIKA	MNJ_SS	Sentinel	32	Female	Yes	Primary	Yes	Yes	Yes	No	No	Yes	No	Yes	No	No	No	No	Yes	Negative	NA
FI05472	MANANJARY	TSIATOSIKA	MNJ_SS	Sentinel	34	Female	Yes	Primary	Yes	Yes	Yes	No	Yes	Yes	No	No	Yes	No	No	No	Yes	Negative	NA
FI05473	MANANJARY	TSIATOSIKA	MNJ_SS	Sentinel	21	Female	Yes	Primary	Yes	Yes	Yes	No	No	No	No	No	No	No	No	No	No	Negative	NA
FI05474	MANANJARY	TSIATOSIKA	MNJ_SS	Sentinel	30	Female	Yes	Primary	Yes	Yes	Yes	Yes	Yes	Yes	No	No	No	No	No	No	Yes	Negative	NA
FI05475	MANANJARY	TSIATOSIKA	MNJ_SS	Sentinel	18	Female	Yes	Primary	Yes	Yes	Yes	Yes	Yes	No	No	No	No	No	No	No	No	Negative	NA
FI05476	MANANJARY	TSIATOSIKA	MNJ_SS	Sentinel	18	Female	Yes	Primary	Yes	Yes	Yes	Yes	Yes	No	No	No	No	No	No	No	No	Negative	NA
FI05477	MANANJARY	TSIATOSIKA	MNJ_SS	Sentinel	20	Female	Yes	Primary	Yes	Yes	Yes	Yes	Yes	Yes	No	Yes	No	No	No	No	Yes	Negative	NA
FI05478	MANANJARY	TSIATOSIKA	MNJ_SS	Sentinel	20	Female	Yes	Primary	Yes	Yes	Yes	Yes	Yes	No	No	No	No	No	No	No	No	Negative	NA
FI05479	MANANJARY	TSIATOSIKA	MNJ_SS	Sentinel	45	Female	Yes	Primary	Yes	Yes	Yes	No	No	Yes	Yes	Yes	No	No	No	No	Yes	Negative	NA
FI05480	MANANJARY	TSIATOSIKA	MNJ_SS	Sentinel	15	Female	Yes	Primary	Yes	Yes	Yes	No	No	Yes	No	Yes	Yes	No	No	No	Yes	Negative	NA
FI05481	MANANJARY	TSIATOSIKA	MNJ_SS	Sentinel	8	Female	Yes	Primary	Yes	Yes	Yes	No	No	No	No	No	No	No	No	No	No	Negative	NA
FI05482	MANANJARY	TSIATOSIKA	MNJ_SS	Sentinel	40	Female	Yes	Primary	Yes	Yes	Yes	No	Yes	Yes	No	No	Yes	No	No	No	Yes	Negative	NA
FI05483	MANANJARY	TSIATOSIKA	MNJ_SS	Sentinel	19	Female	No	No education	No	No	No	No	Yes	No	No	No	No	No	No	No	No	Negative	NA
FI05484	MANANJARY	TSIATOSIKA	MNJ_SS	Sentinel	8	Female	Yes	Primary	Yes	Yes	Yes	No	No	No	No	No	No	No	No	No	No	Negative	NA
FI05485	MANANJARY	TSIATOSIKA	MNJ_SS	Sentinel	54	Male	Yes	Primary	Yes	Yes	Yes	No	No	Yes	Yes	Yes	No	No	No	No	Yes	Negative	NA
FI05486	MANANJARY	TSIATOSIKA	MNJ_SS	Sentinel	62	Female	Yes	Primary	Yes	Yes	Yes	No	Yes	Yes	No	No	Yes	No	No	No	Yes	Negative	NA
FI05487	MANANJARY	TSIATOSIKA	MNJ_SS	Sentinel	18	Male	Yes	Primary	Yes	Yes	Yes	No	No	Yes	No	Yes	Yes	No	No	No	Yes	Negative	NA
FI05488	MANANJARY	TSIATOSIKA	MNJ_SS	Sentinel	24	Male	Yes	Primary	Yes	Yes	Yes	No	Yes	Yes	No	No	Yes	No	No	No	Yes	Negative	NA
FI05489	MANANJARY	TSIATOSIKA	MNJ_SS	Sentinel	54	Female	Yes	Primary	Yes	Yes	Yes	No	Yes	Yes	No	No	Yes	No	No	No	Yes	Negative	NA
FI05490	MANANJARY	TSIATOSIKA	MNJ_SS	Sentinel	11	Male	Yes	Primary	Yes	Yes	Yes	No	No	No	No	No	No	No	No	No	No	Negative	NA
FI05491	MANANJARY	TSIATOSIKA	MNJ_SS	Sentinel	10	Female	Yes	Primary	Yes	Yes	Yes	No	No	No	No	No	No	No	No	No	No	Negative	NA
FI05492	MANANJARY	TSIATOSIKA	MNJ_SS	Sentinel	42	Female	Yes	Primary	Yes	Yes	Yes	Yes	Yes	Yes	No	No	No	No	No	No	Yes	Negative	NA
FI05493	MANANJARY	TSIATOSIKA	MNJ_SS	Sentinel	16	Female	Yes	Primary	Yes	Yes	Yes	No	No	No	No	No	No	No	No	No	No	Negative	NA
FI05494	MANANJARY	TSIATOSIKA	MNJ_SS	Sentinel	12	Female	Yes	Primary	Yes	Yes	Yes	Yes	Yes	No	No	No	No	No	No	No	No	Negative	NA
FI05495	MANANJARY	TSIATOSIKA	MNJ_SS	Sentinel	9	Female	Yes	Primary	Yes	Yes	Yes	Yes	Yes	No	No	No	No	No	No	No	No	Negative	NA
FI05496	MANANJARY	TSIATOSIKA	MNJ_SS	Sentinel	6	Female	Yes	Primary	Yes	Yes	Yes	Yes	Yes	No	No	No	No	No	No	No	No	Negative	NA
FI05497	MANANJARY	TSIATOSIKA	MNJ_SS	Sentinel	41	Male	Yes	Primary	Yes	Yes	Yes	Yes	Yes	Yes	No	No	No	No	No	No	No	Negative	NA
FI05498	MANANJARY	TSIATOSIKA	MNJ_SS	Sentinel	70	Female	Yes	Primary	No	No	No	No	Yes	Yes	No	No	Yes	No	No	No	Yes	Negative	NA
FI05499	MANANJARY	TSIATOSIKA	MNJ_SS	Sentinel	45	Male	Yes	Secondary or higher	Yes	Yes	Yes	No	Yes	Yes	No	No	Yes	No	No	No	Yes	Negative	NA
FI05500	MANANJARY	TSIATOSIKA	MNJ_SS	Sentinel	18	Female	Yes	Secondary or higher	Yes	Yes	Yes	No	No	No	No	No	No	No	No	No	No	Negative	NA
FI05501	MANANJARY	TSIATOSIKA	MNJ_SS	Sentinel	12	Female	Yes	Primary	Yes	Yes	Yes	No	No	No	No	No	No	No	No	No	No	Negative	NA
FI05502	MANANJARY	TSIATOSIKA	MNJ_SS	Sentinel	10	Male	Yes	Primary	Yes	Yes	Yes	No	No	No	No	No	No	No	No	No	No	Negative	NA
FI05503	MANANJARY	TSIATOSIKA	MNJ_SS	Sentinel	18	Female	Yes	Primary	Yes	Yes	Yes	No	No	No	No	No	No	No	No	No	No	Negative	NA
FI05504	MANANJARY	TSIATOSIKA	MNJ_SS	Sentinel	9	Female	Yes	Primary	Yes	Yes	Yes	No	No	No	No	No	No	No	No	No	No	Negative	NA
FI05505	MANANJARY	TSIATOSIKA	MNJ_SS	Sentinel	7	Female	Yes	Primary	Yes	Yes	Yes	No	No	No	No	No	No	No	No	No	No	Negative	NA
FI05506	MANANJARY	TSIATOSIKA	MNJ_SS	Sentinel	37	Female	Yes	Primary	Yes	Yes	Yes	Yes	Yes	Yes	No	Yes	Yes	No	No	No	Yes	Negative	NA
FI05507	MANANJARY	TSIATOSIKA	MNJ_SS	Sentinel	45	Male	Yes	Secondary or higher	Yes	Yes	Yes	Yes	Yes	Yes	No	Yes	Yes	Yes	No	No	Yes	Negative	NA
FI05508	MANANJARY	TSIATOSIKA	MNJ_SS	Sentinel	62	Female	Yes	Primary	No	No	No	No	No	Yes	Yes	Yes	Yes	No	No	No	Yes	Negative	NA
FI05509	MANANJARY	TSIATOSIKA	MNJ_SS	Sentinel	32	Male	Yes	Secondary or higher	Yes	Yes	Yes	Yes	Yes	Yes	No	No	Yes	No	No	No	Yes	Negative	NA
FI05510	MANANJARY	TSIATOSIKA	MNJ_SS	Sentinel	33	Female	Yes	Primary	Yes	Yes	Yes	Yes	Yes	Yes	No	No	No	No	No	No	Yes	Negative	NA
FI05511	MANANJARY	TSIATOSIKA	MNJ_SS	Sentinel	45	Female	Yes	Primary	Yes	Yes	Yes	Yes	Yes	No	No	No	No	No	No	No	No	Negative	NA
FI05512	MANANJARY	TSIATOSIKA	MNJ_SS	Sentinel	44	Male	Yes	Primary	Yes	Yes	Yes	NA	Yes	Yes	No	Yes	Yes	No	No	No	Yes	Negative	NA
FI05513	MANANJARY	TSIATOSIKA	MNJ_SS	Sentinel	11	Female	Yes	Primary	Yes	Yes	Yes	Yes	Yes	No	No	No	No	No	No	No	No	Negative	NA
FI05514	MANANJARY	TSIATOSIKA	MNJ_SS	Sentinel	10	Female	Yes	Primary	Yes	Yes	Yes	Yes	Yes	NA	NA	NA	NA	NA	NA	NA	NA	Negative	NA
FI05515	MANANJARY	TSIATOSIKA	MNJ_SS	Sentinel	NA	Female	Yes	Primary	Yes	Yes	Yes	Yes	Yes	No	No	No	No	No	No	No	No	Negative	NA
FI05516	MANANJARY	TSIATOSIKA	MNJ_SS	Sentinel	7	Female	Yes	Primary	Yes	Yes	Yes	Yes	Yes	No	No	No	No	No	No	No	No	Negative	NA
FI05517	MANANJARY	TSIATOSIKA	MNJ_SS	Sentinel	43	Male	Yes	Primary	Yes	Yes	Yes	No	No	Yes	Yes	No	No	No	No	No	NA	Negative	NA
FI05518	MANANJARY	TSIATOSIKA	MNJ_SS	Sentinel	5	Female	Yes	Primary	Yes	Yes	Yes	No	No	No	No	No	No	No	No	No	No	Negative	NA
FI05519	MANANJARY	TSIATOSIKA	MNJ_SS	Sentinel	7	Female	Yes	Primary	Yes	Yes	Yes	No	No	No	No	No	No	No	No	No	No	Negative	NA
FI05520	MANANJARY	TSIATOSIKA	MNJ_SS	Sentinel	46	Male	Yes	Primary	Yes	Yes	Yes	No	No	Yes	Yes	Yes	Yes	No	No	No	Yes	Negative	NA
FI05521	MANANJARY	TSIATOSIKA	MNJ_SS	Sentinel	44	Female	Yes	Primary	Yes	Yes	Yes	No	No	Yes	Yes	Yes	Yes	No	No	No	Yes	Negative	NA
FI05522	MANANJARY	TSIATOSIKA	MNJ_SS	Sentinel	50	Male	Yes	Primary	Yes	Yes	Yes	No	No	No	No	No	No	No	No	No	No	Negative	NA
FI05523	MANANJARY	TSIATOSIKA	MNJ_SS	Sentinel	52	Male	Yes	Primary	Yes	Yes	Yes	No	No	Yes	No	Yes	Yes	No	No	No	Yes	Negative	NA
FI05524	MANANJARY	TSIATOSIKA	MNJ_SS	Sentinel	21	Female	Yes	Primary	Yes	Yes	Yes	No	Yes	Yes	No	Yes	Yes	No	No	No	Yes	Negative	NA
FI05525	MANANJARY	TSIATOSIKA	MNJ_SS	Sentinel	40	Female	Yes	Primary	Yes	Yes	Yes	No	Yes	Yes	No	No	Yes	No	No	No	Yes	Negative	NA
FI05526	MANANJARY	TSIATOSIKA	MNJ_SS	Sentinel	57	Male	Yes	Secondary or higher	Yes	Yes	Yes	Yes	Yes	Yes	No	No	Yes	No	No	No	Yes	Negative	NA
FI05527	MANANJARY	TSIATOSIKA	MNJ_SS	Sentinel	54	Male	Yes	Primary	Yes	Yes	Yes	Yes	Yes	Yes	No	No	Yes	No	No	No	Yes	Positive	Negative
FI05528	MANANJARY	TSIATOSIKA	MNJ_SS	Sentinel	34	Female	Yes	Primary	Yes	Yes	Yes	No	No	Yes	No	No	Yes	No	No	No	Yes	Negative	NA
FI05529	MANANJARY	TSIATOSIKA	MNJ_SS	Sentinel	30	Male	Yes	Primary	Yes	Yes	Yes	Yes	Yes	Yes	No	Yes	Yes	No	No	No	Yes	Negative	NA
FI05530	MANANJARY	TSIATOSIKA	MNJ_SS	Sentinel	46	Female	Yes	Primary	Yes	NA	Yes	Yes	Yes	No	No	No	No	No	No	No	No	Negative	NA
FI05531	MANANJARY	TSIATOSIKA	MNJ_SS	Sentinel	84	Female	No	No education	Yes	Yes	Yes	Yes	Yes	No	No	No	No	No	No	No	No	Negative	NA
FI05532	MANANJARY	TSIATOSIKA	MNJ_SS	Sentinel	66	Female	No	No education	No	No	No	Yes	Yes	Yes	No	No	Yes	No	No	No	Yes	Negative	NA
FI05533	MANANJARY	TSIATOSIKA	MNJ_SS	Sentinel	52	Female	Yes	Primary	Yes	Yes	Yes	Yes	Yes	Yes	No	Yes	Yes	No	No	No	Yes	Negative	NA
FI05534	MANANJARY	TSIATOSIKA	MNJ_SS	Sentinel	40	Female	No	No education	No	No	No	Yes	Yes	Yes	No	No	Yes	No	No	No	Yes	Negative	NA
FI05535	MANANJARY	TSIATOSIKA	MNJ_SS	Sentinel	68	Male	Yes	Primary	Yes	Yes	Yes	Yes	Yes	Yes	No	Yes	No	No	No	No	Yes	Negative	NA
FI05536	MANANJARY	TSIATOSIKA	MNJ_SS	Sentinel	83	Female	No	No education	Yes	Yes	Yes	Yes	Yes	Yes	No	Yes	No	No	No	No	Yes	Negative	NA
FI05537	MANANJARY	TSIATOSIKA	MNJ_SS	Sentinel	40	Female	Yes	Primary	No	No	No	Yes	Yes	Yes	No	Yes	Yes	No	No	No	Yes	Negative	NA
FI05538	MANANJARY	TSIATOSIKA	MNJ_SS	Sentinel	26	Female	Yes	Primary	Yes	Yes	Yes	Yes	Yes	Yes	No	No	Yes	No	No	No	Yes	Negative	NA
FI05539	MANANJARY	TSIATOSIKA	MNJ_SS	Sentinel	23	Male	Yes	Secondary or higher	Yes	Yes	Yes	Yes	Yes	Yes	No	Yes	Yes	No	No	No	Yes	Negative	NA
FI05540	MANANJARY	TSIATOSIKA	MNJ_SS	Sentinel	24	Female	Yes	Primary	Yes	Yes	Yes	Yes	Yes	Yes	No	No	Yes	No	No	No	Yes	Negative	NA
FI05541	MANANJARY	TSIATOSIKA	MNJ_SS	Sentinel	5	Female	Yes	Primary	Yes	Yes	Yes	No	Yes	No	No	No	No	No	No	No	No	Negative	NA
FI05542	MANANJARY	TSIATOSIKA	MNJ_SS	Sentinel	23	Female	Yes	Primary	Yes	Yes	Yes	No	Yes	Yes	No	Yes	No	No	No	No	Yes	Negative	NA
FI05543	MANANJARY	TSIATOSIKA	MNJ_SS	Sentinel	30	Female	Yes	Primary	Yes	Yes	Yes	Yes	Yes	Yes	No	No	Yes	No	No	No	Yes	Negative	NA
FI05544	MANANJARY	TSIATOSIKA	MNJ_SS	Sentinel	28	Female	Yes	Primary	Yes	Yes	Yes	No	Yes	Yes	No	No	Yes	No	No	No	Yes	Negative	NA
FI05545	MANANJARY	TSIATOSIKA	MNJ_SS	Sentinel	40	Female	Yes	Primary	Yes	Yes	No	Yes	Yes	Yes	No	No	Yes	No	No	No	Yes	Positive	Negative
FI05546	MANANJARY	TSIATOSIKA	MNJ_SS	Sentinel	10	Female	Yes	Primary	Yes	Yes	Yes	No	No	No	No	No	No	No	No	No	No	Negative	NA
FI05547	MANANJARY	TSIATOSIKA	MNJ_SS	Sentinel	55	Female	Yes	Primary	Yes	Yes	Yes	Yes	Yes	Yes	No	No	Yes	No	No	No	Yes	Negative	NA
FI05548	MANANJARY	TSIATOSIKA	MNJ_SS	Sentinel	52	Male	Yes	Primary	Yes	Yes	Yes	Yes	Yes	Yes	No	Yes	Yes	No	No	No	Yes	Negative	NA
FI05549	MANANJARY	TSIATOSIKA	MNJ_SS	Sentinel	18	Female	Yes	Primary	Yes	Yes	Yes	No	Yes	No	No	No	No	No	No	No	No	Negative	NA
FI05550	MANANJARY	TSIATOSIKA	MNJ_SS	Sentinel	62	Female	Yes	Secondary or higher	Yes	Yes	Yes	Yes	Yes	Yes	No	Yes	Yes	No	No	No	Yes	Negative	NA
FI05551	MANANJARY	TSIATOSIKA	MNJ_SS	Sentinel	33	Female	Yes	Primary	Yes	Yes	Yes	Yes	Yes	No	No	No	No	No	No	No	No	Positive	Negative
FI05552	MANANJARY	TSIATOSIKA	MNJ_SS	Sentinel	38	Male	Yes	Secondary or higher	Yes	Yes	Yes	Yes	Yes	Yes	No	Yes	Yes	No	No	No	Yes	Positive	Negative
FI05553	MANANJARY	TSIATOSIKA	MNJ_SS	Sentinel	46	Male	Yes	Secondary or higher	Yes	Yes	Yes	Yes	Yes	Yes	No	Yes	No	No	No	No	Yes	Negative	NA
FI05554	MANANJARY	TSIATOSIKA	MNJ_SS	Sentinel	53	Female	Yes	Primary	Yes	No	No	Yes	Yes	Yes	No	No	Yes	No	No	No	Yes	Negative	NA
FI05555	MANANJARY	TSIATOSIKA	MNJ_SS	Sentinel	5	Female	Yes	Primary	Yes	Yes	Yes	No	No	No	No	No	No	No	No	No	No	Negative	NA
FI05556	MANANJARY	TSIATOSIKA	MNJ_SS	Sentinel	30	Female	Yes	Primary	Yes	Yes	Yes	No	Yes	Yes	No	Yes	Yes	No	No	No	Yes	Negative	NA
FI05557	MANANJARY	TSIATOSIKA	MNJ_SS	Sentinel	5	Female	Yes	Primary	Yes	Yes	Yes	No	NA	No	No	No	No	No	No	No	No	Negative	NA
FI05558	MANANJARY	TSIATOSIKA	MNJ_SS	Sentinel	45	Female	Yes	Primary	Yes	Yes	Yes	No	Yes	Yes	No	No	Yes	No	No	No	Yes	Positive	Negative
FI05559	MANANJARY	TSIATOSIKA	MNJ_SS	Sentinel	8	Female	Yes	Primary	Yes	Yes	Yes	No	No	No	No	No	No	No	No	No	No	Negative	NA
FI05560	MANANJARY	TSIATOSIKA	MNJ_SS	Sentinel	28	Male	Yes	Primary	Yes	No	No	Yes	Yes	Yes	No	No	Yes	No	No	No	Yes	Negative	NA
FI05561	MANANJARY	TSIATOSIKA	MNJ_SS	Sentinel	35	Male	Yes	Primary	Yes	Yes	Yes	Yes	Yes	Yes	No	Yes	Yes	No	No	No	Yes	Positive	Negative
FI05562	MANANJARY	TSIATOSIKA	MNJ_SS	Sentinel	30	Female	Yes	Primary	Yes	Yes	Yes	No	Yes	Yes	No	No	Yes	No	No	No	Yes	Negative	NA
FI05563	MANANJARY	TSIATOSIKA	MNJ_SS	Sentinel	7	Male	Yes	Primary	Yes	Yes	Yes	No	No	No	No	No	No	No	No	No	No	Negative	NA
FI05564	MANANJARY	TSIATOSIKA	MNJ_SS	Sentinel	32	Female	Yes	Primary	Yes	Yes	Yes	Yes	Yes	Yes	No	Yes	No	No	No	No	Yes	Negative	NA
FI05565	MANANJARY	TSIATOSIKA	MNJ_SS	Sentinel	11	Female	Yes	Primary	Yes	Yes	Yes	No	No	No	No	No	No	No	No	No	No	Negative	NA
FI05566	MANANJARY	TSIATOSIKA	MNJ_SS	Sentinel	33	Male	Yes	Secondary or higher	Yes	Yes	Yes	Yes	Yes	Yes	No	No	Yes	No	No	No	Yes	Negative	NA
FI05567	MANANJARY	TSIATOSIKA	MNJ_SS	Sentinel	59	Female	Yes	Primary	Yes	Yes	Yes	Yes	Yes	Yes	No	No	Yes	No	No	No	Yes	Negative	NA
FI05568	MANANJARY	TSIATOSIKA	MNJ_SS	Sentinel	56	Female	Yes	Primary	Yes	Yes	Yes	Yes	Yes	Yes	No	No	Yes	No	No	No	Yes	Negative	NA
FI05569	MANANJARY	TSIATOSIKA	MNJ_SS	Sentinel	31	Female	Yes	Primary	Yes	Yes	Yes	Yes	Yes	Yes	No	Yes	Yes	No	No	No	Yes	Negative	NA
FI05570	MANANJARY	TSIATOSIKA	MNJ_SS	Sentinel	34	Female	Yes	Primary	Yes	Yes	Yes	Yes	Yes	Yes	No	No	Yes	No	No	No	Yes	Negative	NA
FI05571	MANANJARY	TSIATOSIKA	MNJ_SS	Sentinel	5	Male	Yes	Primary	Yes	Yes	Yes	No	No	No	No	No	No	No	No	No	No	Negative	NA
FI05572	MANANJARY	TSIATOSIKA	MNJ_SS	Sentinel	60	Male	Yes	Secondary or higher	Yes	Yes	Yes	Yes	Yes	Yes	No	No	Yes	No	No	No	Yes	Negative	NA
FI05573	MANANJARY	TSIATOSIKA	MNJ_SS	Sentinel	56	Female	No	No education	Yes	Yes	Yes	No	Yes	Yes	No	No	Yes	No	No	No	Yes	Negative	NA
FI05574	MANANJARY	TSIATOSIKA	MNJ_SS	Sentinel	50	Male	Yes	Secondary or higher	Yes	Yes	Yes	No	Yes	Yes	No	No	Yes	No	No	No	Yes	Negative	NA
FI05575	MANANJARY	TSIATOSIKA	MNJ_SS	Sentinel	30	Male	Yes	Primary	Yes	Yes	Yes	No	Yes	Yes	No	No	Yes	No	No	No	Yes	Negative	NA
FI05576	MANANJARY	TSIATOSIKA	MNJ_SS	Sentinel	5	Male	Yes	Primary	Yes	Yes	Yes	No	No	No	No	No	No	No	No	No	No	Negative	NA
FI05577	MANANJARY	TSIATOSIKA	MNJ_SS	Sentinel	10	Male	Yes	Primary	Yes	Yes	Yes	No	No	No	No	No	No	No	No	No	No	Negative	NA
FI05578	MANANJARY	TSIATOSIKA	MNJ_SS	Sentinel	8	Female	Yes	Primary	Yes	Yes	Yes	No	No	No	No	No	No	No	No	No	No	Negative	NA
FI05579	MANANJARY	TSIATOSIKA	MNJ_SS	Sentinel	44	Male	Yes	Primary	Yes	Yes	Yes	Yes	Yes	Yes	No	No	Yes	No	No	No	Yes	Negative	NA
FI05580	MANANJARY	TSIATOSIKA	MNJ_SS	Sentinel	13	Female	Yes	Primary	Yes	Yes	Yes	No	No	No	No	No	No	No	No	No	No	Negative	NA
FI05581	MANANJARY	TSIATOSIKA	MNJ_SS	Sentinel	11	Male	Yes	Primary	Yes	Yes	Yes	No	No	No	No	No	No	No	No	No	No	Negative	NA
FI05582	MANANJARY	TSIATOSIKA	MNJ_SS	Sentinel	5	Female	Yes	Primary	Yes	Yes	Yes	No	No	No	No	No	No	No	No	No	No	Negative	NA
FI05583	MANANJARY	TSIATOSIKA	MNJ_SS	Sentinel	55	Male	Yes	Secondary or higher	Yes	Yes	Yes	Yes	Yes	Yes	No	Yes	Yes	No	No	No	Yes	Negative	NA
FI05584	MANANJARY	TSIATOSIKA	MNJ_SS	Sentinel	40	Female	Yes	Primary	Yes	Yes	Yes	No	Yes	Yes	No	No	Yes	No	No	No	Yes	Negative	NA
FI05585	MANANJARY	TSIATOSIKA	MNJ_SS	Sentinel	52	Male	Yes	Secondary or higher	Yes	Yes	Yes	Yes	Yes	Yes	No	No	Yes	No	No	No	Yes	Positive	Negative
FI05586	MANANJARY	TSIATOSIKA	MNJ_SS	Sentinel	43	Female	No	No education	Yes	Yes	Yes	Yes	Yes	Yes	No	Yes	Yes	No	No	No	Yes	Negative	NA
FI05587	MANANJARY	TSIATOSIKA	MNJ_SS	Sentinel	27	Female	Yes	Primary	Yes	Yes	Yes	No	Yes	Yes	No	No	Yes	No	No	No	Yes	Negative	NA
FI05588	MANANJARY	TSIATOSIKA	MNJ_SS	Sentinel	9	Female	Yes	Primary	Yes	Yes	Yes	No	No	No	No	No	No	No	No	No	No	Negative	NA
FI05589	MANANJARY	TSIATOSIKA	MNJ_SS	Sentinel	8	Female	Yes	Primary	Yes	Yes	Yes	No	No	No	No	No	No	No	No	No	No	Negative	NA
FI05590	MANANJARY	TSIATOSIKA	MNJ_SS	Sentinel	59	Male	Yes	Secondary or higher	Yes	Yes	Yes	Yes	Yes	Yes	No	No	Yes	No	No	No	Yes	Negative	NA
FI05591	MANANJARY	TSIATOSIKA	MNJ_SS	Sentinel	11	Male	Yes	Primary	Yes	Yes	Yes	No	No	No	No	No	No	No	No	No	No	Negative	NA
FI05592	MANANJARY	TSIATOSIKA	MNJ_SS	Sentinel	7	Male	Yes	Primary	Yes	Yes	Yes	No	No	No	No	No	No	No	No	No	No	Negative	NA
FI05593	MANANJARY	TSIATOSIKA	MNJ_SS	Sentinel	17	Female	Yes	Secondary or higher	Yes	Yes	Yes	No	No	Yes	No	No	Yes	No	No	No	Yes	Negative	NA
FI05594	MANANJARY	TSIATOSIKA	MNJ_SS	Sentinel	14	Female	Yes	Secondary or higher	Yes	Yes	Yes	No	Yes	Yes	No	No	Yes	No	No	No	Yes	Negative	NA
FI05595	MANANJARY	TSIATOSIKA	MNJ_SS	Sentinel	20	Male	Yes	Secondary or higher	Yes	Yes	Yes	No	Yes	Yes	No	No	Yes	No	No	No	Yes	Negative	NA
FI05596	MANANJARY	TSIATOSIKA	MNJ_SS	Sentinel	13	Female	Yes	Secondary or higher	Yes	Yes	Yes	No	Yes	Yes	No	No	Yes	No	No	No	Yes	Negative	NA
FI05597	MANANJARY	TSIATOSIKA	MNJ_SS	Sentinel	16	Female	Yes	Secondary or higher	Yes	Yes	Yes	No	Yes	Yes	No	No	Yes	No	No	No	Yes	Negative	NA
FI05598	MANANJARY	TSIATOSIKA	MNJ_SS	Sentinel	17	Female	Yes	Secondary or higher	Yes	Yes	Yes	No	No	Yes	No	Yes	Yes	No	No	No	Yes	Negative	NA
FI05599	MANANJARY	TSIATOSIKA	MNJ_SS	Sentinel	17	Female	Yes	Secondary or higher	No	No	No	No	No	Yes	No	Yes	Yes	No	No	No	Yes	Negative	NA
FI05600	MANANJARY	TSIATOSIKA	MNJ_SS	Sentinel	18	Male	Yes	Secondary or higher	Yes	Yes	Yes	No	Yes	Yes	No	Yes	Yes	No	No	No	Yes	Negative	NA
FI05601	MANANJARY	TSIATOSIKA	MNJ_SS	Sentinel	44	Female	Yes	Secondary or higher	Yes	Yes	Yes	Yes	Yes	Yes	No	No	No	No	No	No	Yes	Negative	NA
FI05602	MANANJARY	TSIATOSIKA	MNJ_SS	Sentinel	34	Female	Yes	Secondary or higher	Yes	Yes	Yes	No	NA	Yes	No	No	Yes	No	No	No	Yes	Negative	NA
FI05603	MANANJARY	TSIATOSIKA	MNJ_SS	Sentinel	56	Male	Yes	Secondary or higher	Yes	Yes	Yes	Yes	Yes	Yes	No	Yes	Yes	Yes	No	No	Yes	Negative	NA
FI05604	MANANJARY	TSIATOSIKA	MNJ_SS	Sentinel	41	Male	Yes	Secondary or higher	Yes	Yes	Yes	Yes	No	Yes	No	Yes	No	No	No	No	Yes	Negative	NA
FI05605	MANANJARY	TSIATOSIKA	MNJ_SS	Sentinel	56	Male	Yes	Secondary or higher	Yes	Yes	Yes	Yes	Yes	No	No	No	No	No	No	No	No	Negative	NA
FI05606	MANANJARY	TSIATOSIKA	MNJ_SS	Sentinel	18	Male	Yes	Secondary or higher	No	No	No	Yes	Yes	Yes	No	No	Yes	No	No	No	No	Negative	NA
FI05607	MANANJARY	TSIATOSIKA	MNJ_SS	Sentinel	18	Female	Yes	Secondary or higher	Yes	No	No	No	NA	No	No	No	No	No	No	No	No	Negative	NA
FI05608	MANANJARY	TSIATOSIKA	MNJ_SS	Sentinel	17	Male	Yes	Secondary or higher	Yes	Yes	Yes	No	NA	Yes	No	No	Yes	No	No	No	No	Negative	NA
FI05609	MANANJARY	TSIATOSIKA	MNJ_SS	Sentinel	15	Male	Yes	Secondary or higher	Yes	No	Yes	No	No	No	No	No	No	No	No	No	No	Negative	NA
FI05610	MANANJARY	TSIATOSIKA	MNJ_SS	Sentinel	16	Female	Yes	Secondary or higher	No	No	No	Yes	Yes	No	No	No	No	No	No	No	No	Negative	NA
FI05611	MANANJARY	TSIATOSIKA	MNJ_SS	Sentinel	15	Male	Yes	Secondary or higher	Yes	Yes	Yes	Yes	Yes	Yes	No	Yes	No	Yes	No	No	Yes	Negative	NA
FI05612	MANANJARY	TSIATOSIKA	MNJ_SS	Sentinel	17	Female	Yes	Secondary or higher	No	No	No	Yes	Yes	No	No	No	No	No	No	No	No	Negative	NA
FI05613	MANANJARY	TSIATOSIKA	MNJ_SS	Sentinel	17	Female	Yes	Secondary or higher	Yes	Yes	Yes	Yes	Yes	No	No	No	No	No	No	No	No	Negative	NA
FI05614	MANANJARY	TSIATOSIKA	MNJ_SS	Sentinel	14	Female	Yes	Secondary or higher	Yes	Yes	Yes	Yes	Yes	No	No	No	No	No	No	No	No	Negative	NA
FI05615	MANANJARY	TSIATOSIKA	MNJ_SS	Sentinel	15	Female	Yes	Secondary or higher	Yes	Yes	Yes	Yes	Yes	No	No	No	No	No	No	No	No	Negative	NA
FI05616	MANANJARY	TSIATOSIKA	MNJ_SS	Sentinel	15	Female	Yes	Secondary or higher	Yes	Yes	Yes	Yes	Yes	Yes	No	Yes	Yes	No	No	No	Yes	Negative	NA
FI05617	MANANJARY	TSIATOSIKA	MNJ_SS	Sentinel	16	Female	Yes	Secondary or higher	Yes	Yes	Yes	Yes	Yes	No	No	No	No	No	No	No	No	Negative	NA
FI05618	MANANJARY	TSIATOSIKA	MNJ_SS	Sentinel	15	Male	Yes	Secondary or higher	Yes	Yes	Yes	Yes	Yes	Yes	No	No	No	No	No	No	Yes	Negative	NA
FI05619	MANANJARY	TSIATOSIKA	MNJ_SS	Sentinel	18	Male	Yes	Secondary or higher	Yes	Yes	Yes	Yes	Yes	No	No	No	No	No	No	No	No	Negative	NA
FI05620	MANANJARY	TSIATOSIKA	MNJ_SS	Sentinel	17	Female	Yes	Secondary or higher	No	No	No	No	No	No	No	No	No	No	No	No	No	Negative	NA
FI05621	MANANJARY	TSIATOSIKA	MNJ_SS	Sentinel	17	Male	Yes	Secondary or higher	Yes	Yes	Yes	Yes	Yes	No	No	No	No	No	No	No	No	Negative	NA
FI05622	MANANJARY	TSIATOSIKA	MNJ_SS	Sentinel	14	Male	Yes	Secondary or higher	Yes	Yes	Yes	No	No	No	No	No	No	No	No	No	No	Negative	NA
FI05623	MANANJARY	TSIATOSIKA	MNJ_SS	Sentinel	20	Male	Yes	Secondary or higher	Yes	Yes	Yes	No	No	No	No	No	No	No	No	No	No	Negative	NA
FI05624	MANANJARY	TSIATOSIKA	MNJ_SS	Sentinel	25	Female	No	No education	Yes	Yes	Yes	Yes	Yes	No	No	No	No	No	No	No	No	Negative	NA
FI05625	MANANJARY	TSIATOSIKA	MNJ_SS	Sentinel	14	Female	Yes	Secondary or higher	Yes	Yes	Yes	Yes	Yes	No	No	No	No	No	No	No	No	Negative	NA
FI05626	MANANJARY	TSIATOSIKA	MNJ_SS	Sentinel	14	Female	Yes	Secondary or higher	Yes	Yes	Yes	Yes	Yes	No	No	No	No	No	No	No	No	Negative	NA
FI05627	MANANJARY	TSIATOSIKA	MNJ_SS	Sentinel	16	Female	Yes	Secondary or higher	Yes	Yes	Yes	No	No	No	No	No	No	No	No	No	No	Negative	NA
FI05628	MANANJARY	TSIATOSIKA	MNJ_SS	Sentinel	16	Female	Yes	Secondary or higher	Yes	Yes	Yes	No	No	No	No	No	No	No	No	No	No	Negative	NA
FI05629	MANANJARY	TSIATOSIKA	MNJ_SS	Sentinel	14	Female	Yes	Secondary or higher	Yes	Yes	Yes	Yes	Yes	No	No	No	No	No	No	No	No	Negative	NA
FI05630	MANANJARY	TSIATOSIKA	MNJ_SS	Sentinel	12	Female	Yes	Secondary or higher	Yes	Yes	Yes	No	No	No	No	No	No	No	No	No	No	Negative	NA
FI05631	MANANJARY	TSIATOSIKA	MNJ_SS	Sentinel	14	Female	Yes	Secondary or higher	Yes	Yes	Yes	No	No	No	No	No	No	No	No	No	No	Negative	NA
FI05632	MANANJARY	TSIATOSIKA	MNJ_SS	Sentinel	13	Female	Yes	Secondary or higher	Yes	Yes	Yes	No	No	No	No	No	No	No	No	No	No	Negative	NA
FI05633	MANANJARY	TSIATOSIKA	MNJ_SS	Sentinel	14	Male	Yes	Secondary or higher	Yes	Yes	Yes	No	No	No	No	No	No	No	No	No	No	Negative	NA
FI05634	MANANJARY	TSIATOSIKA	MNJ_SS	Sentinel	28	Female	Yes	Secondary or higher	Yes	Yes	Yes	Yes	Yes	Yes	No	Yes	Yes	Yes	No	No	Yes	Negative	NA
FI05635	MANANJARY	TSIATOSIKA	MNJ_SS	Sentinel	5	Female	Yes	Secondary or higher	Yes	Yes	Yes	No	No	No	No	No	No	No	No	No	No	Negative	NA
FI05636	MANANJARY	TSIATOSIKA	MNJ_SS	Sentinel	18	Male	Yes	Secondary or higher	Yes	Yes	Yes	No	No	Yes	No	Yes	Yes	No	No	No	Yes	Negative	NA
FI05637	MANANJARY	TSIATOSIKA	MNJ_SS	Sentinel	22	Male	Yes	Secondary or higher	Yes	Yes	Yes	No	NA	Yes	No	Yes	Yes	No	No	No	Yes	Negative	NA
FI05638	MANANJARY	TSIATOSIKA	MNJ_SS	Sentinel	16	Male	Yes	Secondary or higher	Yes	Yes	Yes	No	No	Yes	No	No	Yes	No	No	No	Yes	Negative	NA
FI05639	MANANJARY	TSIATOSIKA	MNJ_SS	Sentinel	14	Male	Yes	Secondary or higher	Yes	Yes	Yes	No	No	Yes	No	No	Yes	No	No	No	Yes	Negative	NA
FI05640	MANANJARY	TSIATOSIKA	MNJ_SS	Sentinel	16	Male	Yes	Secondary or higher	Yes	Yes	Yes	No	No	Yes	No	No	Yes	No	No	No	Yes	Negative	NA
FI05641	MANANJARY	TSIATOSIKA	MNJ_SS	Sentinel	18	Male	Yes	Secondary or higher	Yes	Yes	Yes	No	No	Yes	No	Yes	Yes	No	No	No	Yes	Negative	NA
FI05642	MANANJARY	TSIATOSIKA	MNJ_SS	Sentinel	18	Male	Yes	Secondary or higher	Yes	Yes	Yes	No	No	Yes	No	Yes	Yes	No	No	No	Yes	Negative	NA
FI05643	MANANJARY	TSIATOSIKA	MNJ_SS	Sentinel	16	Male	Yes	Secondary or higher	Yes	Yes	Yes	No	No	Yes	No	Yes	Yes	No	No	No	Yes	Negative	NA
FI05644	MANANJARY	TSIATOSIKA	MNJ_SS	Sentinel	16	Male	Yes	Secondary or higher	Yes	Yes	Yes	No	No	Yes	No	Yes	No	No	No	No	Yes	Negative	NA
FI05645	MANANJARY	TSIATOSIKA	MNJ_SS	Sentinel	17	Male	Yes	Secondary or higher	Yes	Yes	Yes	No	No	Yes	No	Yes	Yes	No	No	No	Yes	Negative	NA
FI05646	MANANJARY	TSIATOSIKA	MNJ_SS	Sentinel	12	Male	Yes	Primary	Yes	Yes	Yes	No	No	No	No	No	No	No	No	No	No	Negative	NA
FI05647	MANANJARY	TSIATOSIKA	MNJ_SS	Sentinel	15	Male	Yes	Primary	Yes	Yes	Yes	No	No	Yes	No	No	Yes	No	No	No	Yes	Negative	NA
FI05648	MANANJARY	TSIATOSIKA	MNJ_SS	Sentinel	14	Male	Yes	Primary	Yes	Yes	Yes	No	No	No	No	No	No	No	No	No	No	Negative	NA
FI05649	MANANJARY	TSIATOSIKA	MNJ_SS	Sentinel	13	Male	Yes	Primary	Yes	Yes	Yes	No	No	Yes	No	No	Yes	No	No	No	Yes	Negative	NA
FI05650	MANANJARY	TSIATOSIKA	MNJ_SS	Sentinel	17	Male	Yes	Primary	Yes	Yes	Yes	No	NA	Yes	No	No	Yes	No	No	No	Yes	Negative	NA
FI05651	MANANJARY	TSIATOSIKA	MNJ_SS	Sentinel	12	Male	Yes	Primary	Yes	Yes	Yes	No	No	No	No	No	No	No	No	No	No	Negative	NA
FI05652	MANANJARY	TSIATOSIKA	MNJ_SS	Sentinel	16	Male	Yes	Primary	Yes	Yes	Yes	No	No	No	No	No	No	No	No	No	No	Negative	NA
FI05653	MANANJARY	TSIATOSIKA	MNJ_SS	Sentinel	13	Male	Yes	Primary	Yes	Yes	Yes	No	No	Yes	No	No	Yes	No	No	No	Yes	Negative	NA
FI05655	MANANJARY	TSIATOSIKA	MNJ_SS	Sentinel	16	Male	Yes	Primary	Yes	Yes	Yes	No	No	No	No	No	No	No	No	No	No	Negative	NA
FI05656	MANANJARY	TSIATOSIKA	MNJ_SS	Sentinel	15	Male	Yes	Primary	Yes	Yes	Yes	No	Yes	Yes	No	No	Yes	No	No	No	Yes	Negative	NA
FI05657	MANANJARY	TSIATOSIKA	MNJ_SS	Sentinel	13	Male	Yes	Primary	Yes	Yes	Yes	No	No	No	No	No	No	No	No	No	No	Negative	NA
FI05658	MANANJARY	TSIATOSIKA	MNJ_SS	Sentinel	12	Male	Yes	Primary	Yes	Yes	Yes	No	No	Yes	No	No	Yes	No	No	No	Yes	Negative	NA
FI05659	MANANJARY	TSIATOSIKA	MNJ_SS	Sentinel	10	Male	Yes	Primary	Yes	Yes	Yes	No	No	No	No	No	No	No	No	No	No	Negative	NA
FI05660	MANANJARY	TSIATOSIKA	MNJ_SS	Sentinel	12	Male	Yes	Primary	Yes	Yes	Yes	No	Yes	Yes	No	No	Yes	No	No	No	Yes	Negative	NA
FI05661	MANANJARY	TSIATOSIKA	MNJ_SS	Sentinel	16	Female	Yes	Primary	Yes	Yes	Yes	No	Yes	Yes	No	Yes	Yes	No	No	No	Yes	Negative	NA
FI05662	MANANJARY	TSIATOSIKA	MNJ_SS	Sentinel	13	Female	Yes	Primary	Yes	Yes	Yes	No	No	Yes	No	No	Yes	No	No	No	Yes	Negative	NA
FI05663	MANANJARY	TSIATOSIKA	MNJ_SS	Sentinel	16	Female	Yes	Primary	Yes	Yes	Yes	No	No	Yes	No	Yes	Yes	No	No	No	Yes	Negative	NA
FI05664	MANANJARY	TSIATOSIKA	MNJ_SS	Sentinel	14	Female	Yes	Primary	Yes	Yes	Yes	No	Yes	Yes	No	No	Yes	No	No	No	Yes	Negative	NA
FI05665	MANANJARY	TSIATOSIKA	MNJ_SS	Sentinel	14	Female	Yes	Primary	Yes	Yes	Yes	No	No	Yes	No	No	Yes	No	No	No	Yes	Negative	NA
FI05666	MANANJARY	TSIATOSIKA	MNJ_SS	Sentinel	14	Female	Yes	Primary	Yes	Yes	Yes	No	No	Yes	No	No	Yes	No	No	No	Yes	Negative	NA
FI05667	MANANJARY	TSIATOSIKA	MNJ_SS	Sentinel	13	Female	Yes	Primary	Yes	Yes	Yes	No	No	No	No	No	No	No	No	No	No	Negative	NA
FI05668	MANANJARY	TSIATOSIKA	MNJ_SS	Sentinel	14	Female	Yes	Primary	Yes	Yes	Yes	No	No	Yes	No	No	Yes	No	No	No	Yes	Negative	NA
FI05669	MANANJARY	TSIATOSIKA	MNJ_SS	Sentinel	17	Female	Yes	Primary	Yes	Yes	Yes	No	Yes	Yes	No	No	Yes	No	No	No	Yes	Negative	NA
FI05670	MANANJARY	TSIATOSIKA	MNJ_SS	Sentinel	13	Female	Yes	Primary	Yes	Yes	Yes	No	No	Yes	No	No	Yes	No	No	No	Yes	Negative	NA
FI05671	MANANJARY	TSIATOSIKA	MNJ_SS	Sentinel	13	Male	Yes	Primary	Yes	Yes	Yes	No	No	No	No	No	No	No	No	No	No	Negative	NA
FI05672	MANANJARY	TSIATOSIKA	MNJ_SS	Sentinel	18	Female	Yes	Primary	Yes	Yes	Yes	No	Yes	Yes	No	No	Yes	No	No	No	Yes	Negative	NA
FI05673	MANANJARY	TSIATOSIKA	MNJ_SS	Sentinel	18	NA	Yes	Secondary or higher	Yes	Yes	Yes	No	No	Yes	No	No	Yes	No	No	No	Yes	Negative	NA
FI05674	MANANJARY	TSIATOSIKA	MNJ_SS	Sentinel	27	Female	Yes	Primary	Yes	Yes	Yes	No	Yes	Yes	No	No	Yes	No	No	No	Yes	Negative	NA
FI05675	MANANJARY	TSIATOSIKA	MNJ_SS	Sentinel	19	Male	Yes	Secondary or higher	Yes	Yes	Yes	No	Yes	Yes	No	Yes	Yes	No	No	No	Yes	Negative	NA
FI05677	MANANJARY	TSIATOSIKA	MNJ_SS	Sentinel	15	Female	Yes	Secondary or higher	Yes	Yes	Yes	No	No	No	No	No	No	No	No	No	No	Negative	NA
FI05678	MANANJARY	TSIATOSIKA	MNJ_SS	Sentinel	15	Female	Yes	Secondary or higher	Yes	Yes	Yes	Yes	Yes	No	No	No	No	No	No	No	No	Negative	NA
FI05679	MANANJARY	TSIATOSIKA	MNJ_SS	Sentinel	14	Female	Yes	Secondary or higher	Yes	Yes	Yes	No	No	No	No	No	No	No	No	No	No	Negative	NA
FI05680	MANANJARY	TSIATOSIKA	MNJ_SS	Sentinel	13	Female	Yes	Secondary or higher	Yes	Yes	Yes	No	No	No	No	No	No	No	No	No	No	Negative	NA
FI05681	MANANJARY	TSIATOSIKA	MNJ_SS	Sentinel	13	Female	Yes	Secondary or higher	Yes	Yes	Yes	Yes	Yes	No	No	No	No	No	No	No	No	Negative	NA
FI05682	MANANJARY	TSIATOSIKA	MNJ_SS	Sentinel	13	Female	Yes	Secondary or higher	Yes	Yes	Yes	Yes	Yes	No	No	No	No	No	No	No	No	Negative	NA
FI05683	MANANJARY	TSIATOSIKA	MNJ_SS	Sentinel	19	Male	Yes	Primary	Yes	Yes	Yes	No	No	Yes	No	No	Yes	No	No	No	Yes	Negative	NA
FI05684	MANANJARY	TSIATOSIKA	MNJ_SS	Sentinel	47	Male	Yes	Primary	Yes	Yes	Yes	Yes	Yes	Yes	No	No	Yes	No	No	No	Yes	Negative	NA
FI05685	MANANJARY	TSIATOSIKA	MNJ_SS	Sentinel	47	Female	Yes	Primary	Yes	Yes	Yes	No	Yes	Yes	No	Yes	Yes	No	No	No	Yes	Negative	NA
FI05686	MANANJARY	TSIATOSIKA	MNJ_SS	Sentinel	48	Female	No	No education	Yes	Yes	Yes	No	No	Yes	No	No	Yes	No	No	No	Yes	Positive	Negative
FI05687	MANANJARY	TSIATOSIKA	MNJ_SS	Sentinel	12	Female	Yes	Primary	Yes	Yes	Yes	No	No	No	No	No	No	No	No	No	No	Negative	NA
FI05688	MANANJARY	TSIATOSIKA	MNJ_SS	Sentinel	47	Male	Yes	Secondary or higher	Yes	Yes	Yes	No	No	No	No	No	No	No	No	No	No	Negative	NA
FI05689	MANANJARY	TSIATOSIKA	MNJ_SS	Sentinel	12	Female	Yes	Primary	Yes	Yes	Yes	No	No	No	No	No	No	No	No	No	No	Negative	NA
FI05690	MANANJARY	TSIATOSIKA	MNJ_SS	Sentinel	10	Male	Yes	Primary	Yes	Yes	Yes	No	No	No	No	No	No	No	No	No	No	Negative	NA
FI05691	MANANJARY	TSIATOSIKA	MNJ_SS	Sentinel	30	Male	Yes	Secondary or higher	Yes	Yes	Yes	No	Yes	Yes	No	No	Yes	No	No	No	Yes	Negative	NA
FI05692	MANANJARY	TSIATOSIKA	MNJ_SS	Sentinel	30	Female	Yes	Primary	Yes	Yes	Yes	No	Yes	Yes	No	Yes	Yes	No	No	No	Yes	Negative	NA
FI05693	MANANJARY	TSIATOSIKA	MNJ_SS	Sentinel	46	Male	Yes	Primary	Yes	No	No	No	No	Yes	No	No	Yes	No	No	No	Yes	Negative	NA
FI05694	MANANJARY	TSIATOSIKA	MNJ_SS	Sentinel	13	Male	Yes	Primary	Yes	Yes	Yes	No	Yes	No	No	No	No	No	No	No	No	Negative	NA
FI05695	MANANJARY	TSIATOSIKA	MNJ_SS	Sentinel	10	Male	Yes	Primary	Yes	Yes	Yes	No	No	No	No	No	No	No	No	No	No	Negative	NA
FI05696	MANANJARY	TSIATOSIKA	MNJ_SS	Sentinel	23	Male	Yes	Primary	Yes	Yes	Yes	No	Yes	Yes	No	No	Yes	No	No	No	Yes	Negative	NA
FI05697	MANANJARY	TSIATOSIKA	MNJ_SS	Sentinel	12	Male	Yes	Primary	Yes	Yes	Yes	No	No	No	No	No	No	No	No	No	No	Negative	NA
FI05698	MANANJARY	TSIATOSIKA	MNJ_SS	Sentinel	8	Male	Yes	Primary	Yes	Yes	Yes	No	No	No	No	No	No	No	No	No	No	Negative	NA
FI05699	MANANJARY	TSIATOSIKA	MNJ_SS	Sentinel	11	Male	Yes	Primary	Yes	Yes	Yes	No	No	Yes	No	No	Yes	No	No	No	Yes	Negative	NA
FI05700	MANANJARY	TSIATOSIKA	MNJ_SS	Sentinel	34	Male	Yes	Primary	Yes	Yes	Yes	No	Yes	Yes	No	No	Yes	No	No	No	Yes	Negative	NA
FI05610	MANANJARY	TSIATOSIKA	MNJ_SS	Sentinel	NA	NA	NA	NA	NA	NA	NA	NA	NA	NA	NA	NA	NA	NA	NA	NA	NA	Positive	Negative
FI06001	MANAKARA ATSIMO	VINANITELO	MNK_SS	Sentinel	30	Male	No	No education	Yes	Yes	Yes	Yes	NA	Yes	No	No	Yes	No	No	No	Yes	Negative	NA
FI06002	MANAKARA ATSIMO	VINANITELO	MNK_SS	Sentinel	47	Male	No	No education	Yes	Yes	Yes	Yes	Yes	Yes	No	No	Yes	No	No	No	Yes	Negative	NA
FI06003	MANAKARA ATSIMO	VINANITELO	MNK_SS	Sentinel	69	Male	No	No education	Yes	Yes	Yes	No	NA	Yes	No	No	Yes	No	No	No	No	Negative	NA
FI06004	MANAKARA ATSIMO	VINANITELO	MNK_SS	Sentinel	15	Female	No	No education	Yes	Yes	Yes	Yes	Yes	Yes	No	No	No	No	Yes	No	Yes	Negative	NA
FI06005	MANAKARA ATSIMO	VINANITELO	MNK_SS	Sentinel	54	Female	Yes	Primary	Yes	Yes	Yes	Yes	Yes	Yes	No	No	Yes	No	No	No	Yes	Negative	NA
FI06006	MANAKARA ATSIMO	VINANITELO	MNK_SS	Sentinel	28	Female	Yes	Primary	Yes	Yes	No	No	NA	Yes	No	No	Yes	No	No	No	No	Negative	NA
FI06007	MANAKARA ATSIMO	VINANITELO	MNK_SS	Sentinel	13	Female	Yes	Primary	Yes	Yes	Yes	Yes	Yes	No	No	No	No	No	No	No	No	Negative	NA
FI06008	MANAKARA ATSIMO	VINANITELO	MNK_SS	Sentinel	9	Female	Yes	Primary	Yes	Yes	Yes	Yes	Yes	No	No	No	No	No	No	No	No	Negative	NA
FI06009	MANAKARA ATSIMO	VINANITELO	MNK_SS	Sentinel	28	Female	Yes	Primary	Yes	Yes	Yes	Yes	Yes	No	No	No	No	No	No	No	No	Negative	NA
FI06010	MANAKARA ATSIMO	VINANITELO	MNK_SS	Sentinel	31	Female	Yes	Secondary or higher	Yes	Yes	Yes	Yes	Yes	Yes	No	No	Yes	No	No	No	Yes	Negative	NA
FI06011	MANAKARA ATSIMO	VINANITELO	MNK_SS	Sentinel	20	Male	Yes	Primary	Yes	Yes	Yes	No	NA	Yes	No	No	Yes	No	No	No	Yes	Negative	NA
FI06012	MANAKARA ATSIMO	VINANITELO	MNK_SS	Sentinel	12	Female	Yes	Primary	Yes	Yes	Yes	Yes	Yes	Yes	No	No	Yes	No	No	No	Yes	Negative	NA
FI06013	MANAKARA ATSIMO	VINANITELO	MNK_SS	Sentinel	43	Male	Yes	Secondary or higher	Yes	Yes	Yes	Yes	Yes	Yes	No	No	Yes	No	No	No	Yes	Negative	NA
FI06014	MANAKARA ATSIMO	VINANITELO	MNK_SS	Sentinel	9	Female	Yes	Primary	Yes	Yes	Yes	Yes	Yes	No	No	No	No	No	No	No	No	Negative	NA
FI06015	MANAKARA ATSIMO	VINANITELO	MNK_SS	Sentinel	24	Female	Yes	Secondary or higher	Yes	Yes	Yes	Yes	Yes	Yes	No	No	Yes	No	No	No	Yes	Negative	NA
FI06016	MANAKARA ATSIMO	VINANITELO	MNK_SS	Sentinel	32	Female	Yes	Secondary or higher	Yes	Yes	Yes	Yes	Yes	Yes	No	No	Yes	No	No	No	Yes	Negative	NA
FI06017	MANAKARA ATSIMO	VINANITELO	MNK_SS	Sentinel	13	Male	Yes	Secondary or higher	Yes	Yes	Yes	Yes	Yes	Yes	No	No	Yes	No	No	No	Yes	Negative	NA
FI06018	MANAKARA ATSIMO	VINANITELO	MNK_SS	Sentinel	48	Male	Yes	Secondary or higher	Yes	Yes	Yes	Yes	No	Yes	No	Yes	No	No	No	No	Yes	Negative	NA
FI06019	MANAKARA ATSIMO	VINANITELO	MNK_SS	Sentinel	NA	Female	No	No education	No	No	No	No	NA	Yes	No	No	No	No	No	No	NA	Negative	NA
FI06020	MANAKARA ATSIMO	VINANITELO	MNK_SS	Sentinel	46	Female	No	No education	Yes	Yes	Yes	Yes	Yes	Yes	No	No	Yes	No	No	No	Yes	Negative	NA
FI06021	MANAKARA ATSIMO	VINANITELO	MNK_SS	Sentinel	50	Female	No	No education	Yes	Yes	Yes	Yes	Yes	No	No	No	No	No	No	No	No	Negative	NA
FI06022	MANAKARA ATSIMO	VINANITELO	MNK_SS	Sentinel	6	Female	Yes	Primary	Yes	Yes	Yes	NA	NA	No	No	No	No	No	No	No	No	Negative	NA
FI06023	MANAKARA ATSIMO	VINANITELO	MNK_SS	Sentinel	11	Female	Yes	Primary	Yes	Yes	Yes	NA	NA	No	No	No	No	No	No	No	No	Negative	NA
FI06024	MANAKARA ATSIMO	VINANITELO	MNK_SS	Sentinel	50	Female	No	No education	Yes	Yes	Yes	Yes	Yes	Yes	No	No	Yes	No	No	No	Yes	Negative	NA
FI06025	MANAKARA ATSIMO	VINANITELO	MNK_SS	Sentinel	7	Female	Yes	Primary	Yes	Yes	Yes	Yes	Yes	No	No	No	No	No	No	No	No	Negative	NA
FI06026	MANAKARA ATSIMO	VINANITELO	MNK_SS	Sentinel	30	Female	No	No education	No	No	No	Yes	Yes	Yes	No	No	Yes	No	No	No	Yes	Negative	NA
FI06027	MANAKARA ATSIMO	VINANITELO	MNK_SS	Sentinel	20	Male	Yes	Secondary or higher	Yes	Yes	Yes	Yes	Yes	No	No	No	No	No	No	No	No	Negative	NA
FI06028	MANAKARA ATSIMO	VINANITELO	MNK_SS	Sentinel	17	Female	Yes	Primary	No	No	No	Yes	Yes	Yes	No	No	Yes	No	No	No	Yes	Negative	NA
FI06029	MANAKARA ATSIMO	VINANITELO	MNK_SS	Sentinel	42	Male	Yes	Primary	Yes	Yes	Yes	Yes	Yes	Yes	No	No	Yes	No	No	No	Yes	Negative	NA
FI06030	MANAKARA ATSIMO	VINANITELO	MNK_SS	Sentinel	36	Male	Yes	Secondary or higher	Yes	Yes	NA	Yes	Yes	Yes	No	Yes	Yes	No	No	Yes	Yes	Negative	NA
FI06031	MANAKARA ATSIMO	VINANITELO	MNK_SS	Sentinel	30	Female	Yes	Primary	Yes	Yes	Yes	Yes	Yes	Yes	No	No	Yes	No	No	No	Yes	Negative	NA
FI06032	MANAKARA ATSIMO	VINANITELO	MNK_SS	Sentinel	NA	Male	Yes	Primary	Yes	Yes	Yes	Yes	Yes	Yes	No	No	Yes	No	No	No	Yes	Negative	NA
FI06033	MANAKARA ATSIMO	VINANITELO	MNK_SS	Sentinel	40	Female	Yes	Primary	Yes	Yes	Yes	No	No	Yes	Yes	No	Yes	No	No	No	No	Negative	NA
FI06034	MANAKARA ATSIMO	VINANITELO	MNK_SS	Sentinel	44	Male	Yes	Primary	Yes	Yes	Yes	Yes	Yes	Yes	No	No	Yes	No	No	No	Yes	Negative	NA
FI06035	MANAKARA ATSIMO	VINANITELO	MNK_SS	Sentinel	30	Female	No	No education	No	No	No	Yes	Yes	No	No	No	No	No	No	No	No	Negative	NA
FI06036	MANAKARA ATSIMO	VINANITELO	MNK_SS	Sentinel	64	Male	Yes	Primary	Yes	Yes	Yes	Yes	Yes	Yes	No	No	Yes	No	No	No	Yes	Negative	NA
FI06037	MANAKARA ATSIMO	VINANITELO	MNK_SS	Sentinel	29	Male	Yes	Secondary or higher	No	No	No	Yes	Yes	Yes	No	No	Yes	No	No	No	Yes	Negative	NA
FI06038	MANAKARA ATSIMO	VINANITELO	MNK_SS	Sentinel	14	Female	Yes	Secondary or higher	Yes	Yes	Yes	Yes	Yes	No	No	No	No	No	No	No	No	Negative	NA
FI06039	MANAKARA ATSIMO	VINANITELO	MNK_SS	Sentinel	53	Female	Yes	Secondary or higher	Yes	Yes	Yes	Yes	Yes	No	No	No	No	No	No	No	No	Negative	NA
FI06040	MANAKARA ATSIMO	VINANITELO	MNK_SS	Sentinel	40	Male	Yes	Secondary or higher	Yes	Yes	Yes	Yes	Yes	Yes	No	Yes	Yes	No	No	No	Yes	Negative	NA
FI06041	MANAKARA ATSIMO	VINANITELO	MNK_SS	Sentinel	52	Female	Yes	Secondary or higher	Yes	Yes	Yes	Yes	Yes	Yes	No	Yes	Yes	No	No	No	Yes	Negative	NA
FI06042	MANAKARA ATSIMO	VINANITELO	MNK_SS	Sentinel	32	Male	Yes	Primary	Yes	Yes	NA	Yes	Yes	Yes	No	No	Yes	No	No	No	Yes	Negative	NA
FI06043	MANAKARA ATSIMO	VINANITELO	MNK_SS	Sentinel	11	Male	Yes	Primary	Yes	Yes	Yes	Yes	Yes	No	No	No	No	No	No	No	No	Negative	NA
FI06044	MANAKARA ATSIMO	VINANITELO	MNK_SS	Sentinel	17	Male	Yes	Secondary or higher	Yes	Yes	Yes	Yes	Yes	Yes	No	No	Yes	No	No	No	Yes	Negative	NA
FI06045	MANAKARA ATSIMO	VINANITELO	MNK_SS	Sentinel	18	Male	No	No education	No	No	No	Yes	No	No	No	No	No	No	No	No	No	Negative	NA
FI06046	MANAKARA ATSIMO	VINANITELO	MNK_SS	Sentinel	28	Male	Yes	Secondary or higher	Yes	Yes	Yes	Yes	Yes	Yes	No	No	Yes	No	No	No	Yes	Negative	NA
FI06047	MANAKARA ATSIMO	VINANITELO	MNK_SS	Sentinel	5	Female	Yes	Primary	Yes	Yes	Yes	No	No	No	No	No	No	No	No	No	No	Negative	NA
FI06048	MANAKARA ATSIMO	VINANITELO	MNK_SS	Sentinel	5	Female	Yes	Primary	Yes	Yes	Yes	No	No	No	No	No	No	No	No	No	No	Negative	NA
FI06049	MANAKARA ATSIMO	VINANITELO	MNK_SS	Sentinel	21	Female	Yes	Secondary or higher	Yes	Yes	Yes	Yes	Yes	Yes	No	No	Yes	No	No	No	Yes	Negative	NA
FI06050	MANAKARA ATSIMO	VINANITELO	MNK_SS	Sentinel	18	Male	Yes	Secondary or higher	Yes	Yes	No	NA	No	Yes	No	No	Yes	No	No	No	Yes	Negative	NA
FI06051	MANAKARA ATSIMO	VINANITELO	MNK_SS	Sentinel	12	Female	Yes	Primary	Yes	Yes	Yes	Yes	Yes	No	No	No	No	No	No	No	No	Negative	NA
FI06052	MANAKARA ATSIMO	VINANITELO	MNK_SS	Sentinel	13	Male	Yes	Primary	Yes	Yes	Yes	Yes	Yes	Yes	No	No	Yes	No	No	No	Yes	Negative	NA
FI06053	MANAKARA ATSIMO	VINANITELO	MNK_SS	Sentinel	11	Male	Yes	Primary	Yes	Yes	Yes	Yes	Yes	No	No	No	No	No	No	No	No	Negative	NA
FI06054	MANAKARA ATSIMO	VINANITELO	MNK_SS	Sentinel	13	Female	Yes	Primary	Yes	Yes	Yes	Yes	Yes	No	No	No	No	No	No	No	No	Negative	NA
FI06055	MANAKARA ATSIMO	VINANITELO	MNK_SS	Sentinel	47	Male	Yes	Secondary or higher	Yes	Yes	Yes	Yes	Yes	Yes	Yes	No	Yes	No	No	No	Yes	Negative	NA
FI06056	MANAKARA ATSIMO	VINANITELO	MNK_SS	Sentinel	23	Male	Yes	Secondary or higher	Yes	Yes	Yes	Yes	Yes	No	No	No	No	No	No	No	No	Negative	NA
FI06057	MANAKARA ATSIMO	VINANITELO	MNK_SS	Sentinel	38	Female	No	No education	Yes	Yes	Yes	Yes	Yes	No	No	No	No	No	No	No	No	Negative	NA
FI06058	MANAKARA ATSIMO	VINANITELO	MNK_SS	Sentinel	28	Male	Yes	Primary	Yes	Yes	Yes	Yes	Yes	Yes	No	No	Yes	No	No	No	Yes	Negative	NA
FI06059	MANAKARA ATSIMO	VINANITELO	MNK_SS	Sentinel	8	Male	No	No education	Yes	Yes	Yes	NA	NA	No	No	No	No	No	No	No	No	Negative	NA
FI06060	MANAKARA ATSIMO	VINANITELO	MNK_SS	Sentinel	13	Male	Yes	Primary	Yes	Yes	Yes	Yes	Yes	Yes	No	No	Yes	No	No	No	Yes	Negative	NA
FI06061	MANAKARA ATSIMO	VINANITELO	MNK_SS	Sentinel	12	Male	Yes	Primary	Yes	Yes	Yes	Yes	Yes	Yes	No	No	Yes	No	No	No	Yes	Negative	NA
FI06062	MANAKARA ATSIMO	VINANITELO	MNK_SS	Sentinel	28	Male	No	No education	Yes	Yes	Yes	Yes	NA	Yes	No	No	Yes	No	Yes	No	Yes	Negative	NA
FI06063	MANAKARA ATSIMO	VINANITELO	MNK_SS	Sentinel	20	Male	Yes	Primary	Yes	Yes	Yes	Yes	Yes	Yes	No	No	Yes	No	No	No	Yes	Negative	NA
FI06064	MANAKARA ATSIMO	VINANITELO	MNK_SS	Sentinel	21	Male	Yes	Secondary or higher	Yes	Yes	Yes	Yes	Yes	Yes	No	No	Yes	No	No	No	Yes	Negative	NA
FI06065	MANAKARA ATSIMO	VINANITELO	MNK_SS	Sentinel	14	Female	Yes	Primary	Yes	Yes	Yes	Yes	Yes	Yes	No	No	Yes	No	No	No	Yes	Negative	NA
FI06066	MANAKARA ATSIMO	VINANITELO	MNK_SS	Sentinel	22	Female	No	No education	Yes	Yes	Yes	Yes	Yes	Yes	No	No	Yes	No	No	No	Yes	Negative	NA
FI06067	MANAKARA ATSIMO	VINANITELO	MNK_SS	Sentinel	20	Male	Yes	Primary	Yes	Yes	Yes	Yes	Yes	Yes	No	No	Yes	No	No	No	Yes	Negative	NA
FI06068	MANAKARA ATSIMO	VINANITELO	MNK_SS	Sentinel	19	Male	Yes	Primary	No	No	No	Yes	Yes	Yes	Yes	No	Yes	No	Yes	No	Yes	Negative	NA
FI06069	MANAKARA ATSIMO	VINANITELO	MNK_SS	Sentinel	8	Female	Yes	Primary	Yes	Yes	Yes	Yes	Yes	No	No	No	No	No	No	No	No	Negative	NA
FI06070	MANAKARA ATSIMO	VINANITELO	MNK_SS	Sentinel	NA	Female	No	No education	Yes	Yes	Yes	Yes	Yes	Yes	No	No	Yes	No	No	No	Yes	Negative	NA
FI06071	MANAKARA ATSIMO	VINANITELO	MNK_SS	Sentinel	29	Female	Yes	Secondary or higher	Yes	Yes	Yes	Yes	Yes	Yes	No	No	Yes	No	No	No	Yes	Negative	NA
FI06072	MANAKARA ATSIMO	VINANITELO	MNK_SS	Sentinel	10	Female	Yes	Primary	Yes	Yes	NA	Yes	Yes	No	No	No	No	No	No	No	No	Negative	NA
FI06073	MANAKARA ATSIMO	VINANITELO	MNK_SS	Sentinel	7	Male	Yes	Primary	Yes	Yes	Yes	Yes	Yes	No	No	No	No	No	No	No	No	Negative	NA
FI06074	MANAKARA ATSIMO	VINANITELO	MNK_SS	Sentinel	19	Female	Yes	Secondary or higher	Yes	Yes	Yes	Yes	NA	Yes	No	No	Yes	No	No	No	Yes	Negative	NA
FI06075	MANAKARA ATSIMO	VINANITELO	MNK_SS	Sentinel	NA	Female	No	No education	Yes	Yes	Yes	Yes	Yes	Yes	No	No	Yes	No	No	No	Yes	Negative	NA
FI06076	MANAKARA ATSIMO	VINANITELO	MNK_SS	Sentinel	20	Male	Yes	Secondary or higher	Yes	Yes	Yes	Yes	Yes	Yes	No	No	Yes	No	No	No	Yes	Negative	NA
FI06077	MANAKARA ATSIMO	VINANITELO	MNK_SS	Sentinel	24	Male	Yes	Primary	Yes	Yes	Yes	Yes	Yes	Yes	No	No	Yes	No	No	No	Yes	Negative	NA
FI06078	MANAKARA ATSIMO	VINANITELO	MNK_SS	Sentinel	19	Male	Yes	Secondary or higher	Yes	Yes	Yes	Yes	Yes	Yes	No	No	Yes	No	No	No	Yes	Negative	NA
FI06079	MANAKARA ATSIMO	VINANITELO	MNK_SS	Sentinel	20	Male	Yes	Primary	Yes	Yes	Yes	Yes	Yes	Yes	No	No	Yes	No	No	No	Yes	Negative	NA
FI06080	MANAKARA ATSIMO	VINANITELO	MNK_SS	Sentinel	11	Male	Yes	Secondary or higher	Yes	Yes	Yes	Yes	Yes	Yes	No	No	Yes	No	Yes	No	Yes	Negative	NA
FI06081	MANAKARA ATSIMO	VINANITELO	MNK_SS	Sentinel	12	Female	Yes	Primary	No	No	No	Yes	Yes	No	No	No	No	No	No	No	No	Negative	NA
FI06082	MANAKARA ATSIMO	VINANITELO	MNK_SS	Sentinel	12	Male	Yes	Primary	Yes	Yes	Yes	Yes	Yes	No	No	No	No	No	No	No	No	Negative	NA
FI06083	MANAKARA ATSIMO	VINANITELO	MNK_SS	Sentinel	10	Female	Yes	Primary	Yes	Yes	Yes	Yes	Yes	Yes	No	No	Yes	No	No	No	No	Negative	NA
FI06084	MANAKARA ATSIMO	VINANITELO	MNK_SS	Sentinel	24	Female	Yes	Primary	Yes	Yes	Yes	Yes	Yes	Yes	No	No	Yes	No	No	No	Yes	Negative	NA
FI06085	MANAKARA ATSIMO	VINANITELO	MNK_SS	Sentinel	25	Female	No	No education	Yes	No	No	Yes	Yes	Yes	No	No	Yes	No	No	No	Yes	Negative	NA
FI06086	MANAKARA ATSIMO	VINANITELO	MNK_SS	Sentinel	19	Female	No	No education	Yes	Yes	Yes	Yes	Yes	No	No	No	No	No	No	No	No	Negative	NA
FI06087	MANAKARA ATSIMO	VINANITELO	MNK_SS	Sentinel	12	Male	Yes	Primary	Yes	Yes	Yes	Yes	Yes	No	No	No	No	No	No	No	No	Negative	NA
FI06088	MANAKARA ATSIMO	VINANITELO	MNK_SS	Sentinel	7	Male	No	No education	Yes	Yes	Yes	NA	NA	No	No	No	No	No	No	No	No	Negative	NA
FI06089	MANAKARA ATSIMO	VINANITELO	MNK_SS	Sentinel	40	Female	No	No education	Yes	Yes	Yes	Yes	Yes	Yes	No	No	Yes	No	No	No	Yes	Negative	NA
FI06090	MANAKARA ATSIMO	VINANITELO	MNK_SS	Sentinel	NA	Male	Yes	Primary	Yes	Yes	Yes	Yes	Yes	No	No	No	No	No	No	No	No	Negative	NA
FI06091	MANAKARA ATSIMO	VINANITELO	MNK_SS	Sentinel	24	Female	Yes	Secondary or higher	Yes	Yes	NA	Yes	Yes	Yes	No	No	Yes	No	No	No	Yes	Negative	NA
FI06092	MANAKARA ATSIMO	VINANITELO	MNK_SS	Sentinel	10	Male	Yes	Primary	Yes	Yes	Yes	Yes	Yes	No	No	No	No	No	No	No	No	Negative	NA
FI06093	MANAKARA ATSIMO	VINANITELO	MNK_SS	Sentinel	7	Male	Yes	Primary	Yes	Yes	Yes	Yes	Yes	No	No	No	No	No	No	No	No	Negative	NA
FI06094	MANAKARA ATSIMO	VINANITELO	MNK_SS	Sentinel	11	Female	Yes	Primary	Yes	Yes	Yes	Yes	Yes	No	No	No	No	No	No	No	No	Negative	NA
FI06095	MANAKARA ATSIMO	VINANITELO	MNK_SS	Sentinel	5	Female	No	No education	Yes	Yes	Yes	No	No	No	No	No	No	No	No	No	No	Negative	NA
FI06096	MANAKARA ATSIMO	VINANITELO	MNK_SS	Sentinel	9	Male	Yes	Primary	Yes	Yes	Yes	Yes	Yes	No	No	No	No	No	No	No	No	Negative	NA
FI06097	MANAKARA ATSIMO	VINANITELO	MNK_SS	Sentinel	26	Female	Yes	Primary	Yes	Yes	Yes	Yes	Yes	Yes	No	No	Yes	No	No	No	Yes	Negative	NA
FI06098	MANAKARA ATSIMO	VINANITELO	MNK_SS	Sentinel	13	Female	Yes	Primary	Yes	Yes	Yes	Yes	Yes	No	No	No	No	No	No	No	No	Negative	NA
FI06099	MANAKARA ATSIMO	VINANITELO	MNK_SS	Sentinel	45	Female	No	No education	Yes	Yes	Yes	Yes	Yes	Yes	No	No	Yes	No	No	No	Yes	Negative	NA
FI06100	MANAKARA ATSIMO	VINANITELO	MNK_SS	Sentinel	28	Female	Yes	Secondary or higher	Yes	Yes	Yes	Yes	Yes	Yes	No	Yes	Yes	No	No	No	Yes	Negative	NA
FI06101	MANAKARA ATSIMO	VINANITELO	MNK_SS	Sentinel	10	Male	Yes	Primary	Yes	Yes	Yes	NA	Yes	No	No	No	No	No	No	No	No	Negative	NA
FI06102	MANAKARA ATSIMO	VINANITELO	MNK_SS	Sentinel	13	Male	Yes	Primary	Yes	Yes	Yes	Yes	Yes	No	No	No	No	No	No	No	No	Negative	NA
FI06103	MANAKARA ATSIMO	VINANITELO	MNK_SS	Sentinel	13	Male	Yes	Secondary or higher	Yes	Yes	Yes	Yes	Yes	No	No	No	No	No	No	No	No	Negative	NA
FI06104	MANAKARA ATSIMO	VINANITELO	MNK_SS	Sentinel	40	Female	No	No education	Yes	Yes	Yes	Yes	Yes	No	No	No	No	No	No	No	No	Negative	NA
FI06105	MANAKARA ATSIMO	VINANITELO	MNK_SS	Sentinel	22	Female	Yes	Primary	Yes	Yes	Yes	NA	Yes	No	No	No	No	No	No	No	No	Negative	NA
FI06106	MANAKARA ATSIMO	VINANITELO	MNK_SS	Sentinel	28	Female	No	No education	No	No	No	Yes	Yes	Yes	No	No	Yes	No	No	No	Yes	Negative	NA
FI06107	MANAKARA ATSIMO	VINANITELO	MNK_SS	Sentinel	38	Female	No	No education	Yes	Yes	Yes	Yes	Yes	Yes	No	No	Yes	No	No	No	Yes	Negative	NA
FI06108	MANAKARA ATSIMO	VINANITELO	MNK_SS	Sentinel	11	Male	Yes	Secondary or higher	Yes	Yes	Yes	NA	Yes	No	No	No	No	No	No	No	No	Negative	NA
FI06109	MANAKARA ATSIMO	VINANITELO	MNK_SS	Sentinel	15	Male	Yes	Secondary or higher	Yes	Yes	Yes	NA	Yes	No	No	No	No	No	No	No	No	Negative	NA
FI06110	MANAKARA ATSIMO	VINANITELO	MNK_SS	Sentinel	13	Male	Yes	Primary	Yes	Yes	Yes	NA	Yes	Yes	No	No	Yes	No	No	No	Yes	Negative	NA
FI06111	MANAKARA ATSIMO	VINANITELO	MNK_SS	Sentinel	14	Male	Yes	Secondary or higher	Yes	Yes	Yes	NA	Yes	Yes	No	No	Yes	No	No	No	Yes	Negative	NA
FI06112	MANAKARA ATSIMO	VINANITELO	MNK_SS	Sentinel	50	Female	No	No education	Yes	Yes	Yes	Yes	Yes	Yes	No	No	Yes	No	No	No	Yes	Negative	NA
FI06113	MANAKARA ATSIMO	VINANITELO	MNK_SS	Sentinel	NA	Female	Yes	Secondary or higher	Yes	Yes	Yes	No	No	No	No	No	No	No	No	No	No	Negative	NA
FI06114	MANAKARA ATSIMO	VINANITELO	MNK_SS	Sentinel	15	Female	Yes	Secondary or higher	Yes	Yes	Yes	NA	Yes	Yes	No	No	Yes	No	No	No	Yes	Negative	NA
FI06115	MANAKARA ATSIMO	VINANITELO	MNK_SS	Sentinel	17	Female	Yes	Primary	No	No	No	No	No	No	No	No	No	No	No	No	No	Negative	NA
FI06116	MANAKARA ATSIMO	VINANITELO	MNK_SS	Sentinel	18	Female	No	No education	No	No	No	No	No	No	No	No	No	No	No	No	No	Negative	NA
FI06117	MANAKARA ATSIMO	VINANITELO	MNK_SS	Sentinel	18	Female	No	No education	No	No	No	No	NA	Yes	No	No	Yes	No	No	No	Yes	Negative	NA
FI06118	MANAKARA ATSIMO	VINANITELO	MNK_SS	Sentinel	7	Female	Yes	Primary	Yes	Yes	Yes	No	No	No	No	No	No	No	No	No	No	Negative	NA
FI06119	MANAKARA ATSIMO	VINANITELO	MNK_SS	Sentinel	43	Male	Yes	Secondary or higher	Yes	Yes	Yes	Yes	Yes	Yes	Yes	Yes	Yes	No	No	No	Yes	Negative	NA
FI06120	MANAKARA ATSIMO	VINANITELO	MNK_SS	Sentinel	50	Male	Yes	Secondary or higher	Yes	Yes	Yes	Yes	Yes	Yes	No	No	Yes	No	No	No	Yes	Negative	NA
FI06121	MANAKARA ATSIMO	VINANITELO	MNK_SS	Sentinel	31	Male	Yes	Secondary or higher	Yes	Yes	Yes	Yes	Yes	Yes	No	Yes	Yes	No	No	No	Yes	Negative	NA
FI06122	MANAKARA ATSIMO	VINANITELO	MNK_SS	Sentinel	21	Male	Yes	Secondary or higher	Yes	Yes	Yes	Yes	Yes	Yes	No	No	Yes	No	No	No	Yes	Negative	NA
FI06123	MANAKARA ATSIMO	VINANITELO	MNK_SS	Sentinel	21	Female	Yes	Secondary or higher	Yes	Yes	Yes	Yes	Yes	Yes	No	Yes	Yes	No	No	No	Yes	Negative	NA
FI06124	MANAKARA ATSIMO	VINANITELO	MNK_SS	Sentinel	26	Female	Yes	Primary	Yes	Yes	Yes	Yes	Yes	No	No	No	No	No	No	No	No	Negative	NA
FI06125	MANAKARA ATSIMO	VINANITELO	MNK_SS	Sentinel	24	Female	Yes	Secondary or higher	Yes	Yes	Yes	Yes	Yes	Yes	No	No	Yes	No	No	No	Yes	Negative	NA
FI06126	MANAKARA ATSIMO	VINANITELO	MNK_SS	Sentinel	38	Female	Yes	Primary	Yes	Yes	Yes	Yes	Yes	Yes	No	Yes	Yes	No	No	No	Yes	Negative	NA
FI06127	MANAKARA ATSIMO	VINANITELO	MNK_SS	Sentinel	25	Male	Yes	Primary	Yes	Yes	Yes	Yes	Yes	Yes	No	No	Yes	No	No	No	Yes	Negative	NA
FI06128	MANAKARA ATSIMO	VINANITELO	MNK_SS	Sentinel	40	Female	No	No education	No	No	No	Yes	Yes	No	No	No	No	No	No	No	No	Negative	NA
FI06129	MANAKARA ATSIMO	VINANITELO	MNK_SS	Sentinel	NA	Female	Yes	Primary	Yes	Yes	Yes	Yes	Yes	Yes	No	No	Yes	No	No	No	Yes	Negative	NA
FI06130	MANAKARA ATSIMO	VINANITELO	MNK_SS	Sentinel	53	Female	Yes	Primary	Yes	Yes	Yes	Yes	Yes	Yes	No	No	Yes	No	No	No	Yes	Negative	NA
FI06131	MANAKARA ATSIMO	VINANITELO	MNK_SS	Sentinel	36	Male	Yes	Secondary or higher	Yes	Yes	Yes	Yes	Yes	Yes	No	Yes	Yes	No	No	No	Yes	Negative	NA
FI06132	MANAKARA ATSIMO	VINANITELO	MNK_SS	Sentinel	35	Male	Yes	Secondary or higher	Yes	Yes	Yes	Yes	Yes	Yes	No	Yes	Yes	No	No	No	Yes	Negative	NA
FI06133	MANAKARA ATSIMO	VINANITELO	MNK_SS	Sentinel	66	Male	No	No education	Yes	Yes	Yes	Yes	Yes	Yes	No	No	Yes	No	No	No	Yes	Negative	NA
FI06134	MANAKARA ATSIMO	VINANITELO	MNK_SS	Sentinel	70	Male	Yes	Primary	Yes	Yes	Yes	Yes	Yes	Yes	No	No	Yes	No	No	No	Yes	Negative	NA
FI06135	MANAKARA ATSIMO	VINANITELO	MNK_SS	Sentinel	71	Male	No	No education	No	No	No	Yes	Yes	Yes	No	No	Yes	No	No	No	Yes	Negative	NA
FI06136	MANAKARA ATSIMO	VINANITELO	MNK_SS	Sentinel	14	Female	Yes	Secondary or higher	Yes	Yes	Yes	Yes	Yes	Yes	No	No	Yes	No	No	No	Yes	Negative	NA
FI06137	MANAKARA ATSIMO	VINANITELO	MNK_SS	Sentinel	13	Female	Yes	Primary	Yes	Yes	Yes	Yes	Yes	Yes	No	No	Yes	No	No	No	Yes	Negative	NA
FI06138	MANAKARA ATSIMO	VINANITELO	MNK_SS	Sentinel	13	Female	Yes	Primary	Yes	Yes	Yes	Yes	Yes	Yes	No	No	Yes	No	No	No	NA	Negative	NA
FI06139	MANAKARA ATSIMO	VINANITELO	MNK_SS	Sentinel	15	Female	Yes	Secondary or higher	Yes	Yes	Yes	Yes	Yes	Yes	No	No	Yes	No	No	No	Yes	Negative	NA
FI06140	MANAKARA ATSIMO	VINANITELO	MNK_SS	Sentinel	57	Male	Yes	Secondary or higher	Yes	Yes	Yes	Yes	Yes	Yes	No	No	Yes	No	No	No	Yes	Negative	NA
FI06141	MANAKARA ATSIMO	VINANITELO	MNK_SS	Sentinel	12	Female	Yes	Primary	Yes	Yes	Yes	Yes	Yes	No	No	No	No	No	No	No	No	Negative	NA
FI06142	MANAKARA ATSIMO	VINANITELO	MNK_SS	Sentinel	25	Female	Yes	Primary	Yes	Yes	Yes	Yes	Yes	No	No	No	No	No	No	No	No	Negative	NA
FI06143	MANAKARA ATSIMO	VINANITELO	MNK_SS	Sentinel	8	Male	No	No education	Yes	Yes	Yes	Yes	Yes	No	No	No	No	No	No	No	No	Negative	NA
FI06144	MANAKARA ATSIMO	VINANITELO	MNK_SS	Sentinel	60	Female	No	No education	Yes	Yes	Yes	Yes	Yes	Yes	No	No	Yes	No	No	No	Yes	Negative	NA
FI06145	MANAKARA ATSIMO	VINANITELO	MNK_SS	Sentinel	19	Female	No	No education	No	No	No	No	No	Yes	No	No	Yes	No	No	No	Yes	Negative	NA
FI06146	MANAKARA ATSIMO	VINANITELO	MNK_SS	Sentinel	57	Male	Yes	Primary	Yes	Yes	Yes	Yes	Yes	Yes	No	No	Yes	No	No	No	Yes	Negative	NA
FI06147	MANAKARA ATSIMO	VINANITELO	MNK_SS	Sentinel	40	Female	No	No education	Yes	Yes	Yes	Yes	Yes	Yes	No	No	Yes	No	No	No	Yes	Negative	NA
FI06148	MANAKARA ATSIMO	VINANITELO	MNK_SS	Sentinel	30	Male	Yes	Primary	Yes	Yes	Yes	Yes	No	Yes	No	No	Yes	No	No	No	Yes	Negative	NA
FI06149	MANAKARA ATSIMO	VINANITELO	MNK_SS	Sentinel	37	Male	No	No education	Yes	Yes	Yes	Yes	Yes	Yes	No	No	Yes	No	No	No	Yes	Negative	NA
FI06150	MANAKARA ATSIMO	VINANITELO	MNK_SS	Sentinel	14	Female	Yes	Secondary or higher	Yes	Yes	Yes	Yes	No	Yes	No	No	Yes	No	No	No	No	Negative	NA
FI06151	MANAKARA ATSIMO	VINANITELO	MNK_SS	Sentinel	35	Female	No	No education	Yes	NA	Yes	No	No	Yes	Yes	No	No	No	No	No	No	Negative	NA
FI06152	MANAKARA ATSIMO	VINANITELO	MNK_SS	Sentinel	18	Female	No	No education	Yes	NA	Yes	No	Yes	No	No	No	No	No	No	No	No	Negative	NA
FI06153	MANAKARA ATSIMO	VINANITELO	MNK_SS	Sentinel	11	Male	Yes	Secondary or higher	Yes	Yes	Yes	Yes	Yes	Yes	No	No	Yes	No	No	No	Yes	Negative	NA
FI06154	MANAKARA ATSIMO	VINANITELO	MNK_SS	Sentinel	52	Female	Yes	Secondary or higher	Yes	NA	Yes	Yes	Yes	Yes	Yes	No	No	No	No	No	Yes	Negative	NA
FI06155	MANAKARA ATSIMO	VINANITELO	MNK_SS	Sentinel	20	Male	Yes	Secondary or higher	Yes	Yes	Yes	Yes	Yes	Yes	No	No	No	Yes	No	No	Yes	Negative	NA
FI06156	MANAKARA ATSIMO	VINANITELO	MNK_SS	Sentinel	20	Male	Yes	Secondary or higher	Yes	Yes	Yes	Yes	Yes	Yes	No	No	Yes	No	No	No	Yes	Negative	NA
FI06157	MANAKARA ATSIMO	VINANITELO	MNK_SS	Sentinel	37	Female	Yes	Secondary or higher	Yes	Yes	Yes	Yes	Yes	Yes	Yes	No	No	No	No	No	Yes	Negative	NA
FI06158	MANAKARA ATSIMO	VINANITELO	MNK_SS	Sentinel	6	Female	Yes	Primary	Yes	Yes	Yes	Yes	Yes	No	No	No	No	No	No	No	No	Negative	NA
FI06159	MANAKARA ATSIMO	VINANITELO	MNK_SS	Sentinel	40	Female	No	No education	Yes	Yes	Yes	Yes	Yes	Yes	No	No	No	Yes	No	No	Yes	Negative	NA
FI06160	MANAKARA ATSIMO	VINANITELO	MNK_SS	Sentinel	15	Male	Yes	Primary	Yes	Yes	Yes	NA	No	No	No	No	No	No	No	No	No	Negative	NA
FI06161	MANAKARA ATSIMO	VINANITELO	MNK_SS	Sentinel	13	Female	Yes	Primary	Yes	Yes	Yes	No	Yes	No	No	No	No	No	No	No	No	Negative	NA
FI06162	MANAKARA ATSIMO	VINANITELO	MNK_SS	Sentinel	11	Female	Yes	Primary	Yes	Yes	Yes	No	Yes	No	No	No	No	No	No	No	No	Negative	NA
FI06163	MANAKARA ATSIMO	VINANITELO	MNK_SS	Sentinel	28	Female	No	No education	Yes	Yes	Yes	Yes	Yes	Yes	No	No	Yes	No	No	No	Yes	Negative	NA
FI06164	MANAKARA ATSIMO	VINANITELO	MNK_SS	Sentinel	19	Male	Yes	Secondary or higher	No	No	No	Yes	Yes	Yes	No	No	Yes	Yes	No	No	Yes	Negative	NA
FI06165	MANAKARA ATSIMO	VINANITELO	MNK_SS	Sentinel	20	Female	No	No education	Yes	Yes	Yes	Yes	NA	Yes	No	No	Yes	No	No	No	Yes	Negative	NA
FI06166	MANAKARA ATSIMO	VINANITELO	MNK_SS	Sentinel	17	Male	Yes	Secondary or higher	Yes	Yes	Yes	Yes	Yes	Yes	No	No	No	No	No	No	Yes	Negative	NA
FI06167	MANAKARA ATSIMO	VINANITELO	MNK_SS	Sentinel	21	Male	No	No education	No	No	No	Yes	No	Yes	No	No	Yes	No	No	No	Yes	Negative	NA
FI06168	MANAKARA ATSIMO	VINANITELO	MNK_SS	Sentinel	32	Female	Yes	Secondary or higher	Yes	Yes	Yes	Yes	Yes	Yes	No	No	Yes	No	No	No	Yes	Negative	NA
FI06169	MANAKARA ATSIMO	VINANITELO	MNK_SS	Sentinel	6	Female	Yes	Primary	Yes	Yes	Yes	No	Yes	No	No	No	No	No	No	No	No	Negative	NA
FI06170	MANAKARA ATSIMO	VINANITELO	MNK_SS	Sentinel	60	Female	No	No education	No	No	No	No	No	Yes	No	No	Yes	No	No	No	Yes	Negative	NA
FI06171	MANAKARA ATSIMO	VINANITELO	MNK_SS	Sentinel	50	Female	No	No education	Yes	Yes	Yes	Yes	Yes	Yes	No	No	Yes	No	No	No	Yes	Negative	NA
FI06172	MANAKARA ATSIMO	VINANITELO	MNK_SS	Sentinel	8	Female	Yes	Primary	Yes	Yes	Yes	No	Yes	No	No	No	No	No	No	No	No	Negative	NA
FI06173	MANAKARA ATSIMO	VINANITELO	MNK_SS	Sentinel	7	Female	Yes	Primary	Yes	Yes	Yes	No	Yes	No	No	No	No	No	No	No	No	Negative	NA
FI06174	MANAKARA ATSIMO	VINANITELO	MNK_SS	Sentinel	8	Female	Yes	Primary	Yes	Yes	Yes	No	Yes	No	No	No	No	No	No	No	No	Negative	NA
FI06175	MANAKARA ATSIMO	VINANITELO	MNK_SS	Sentinel	60	Female	No	No education	Yes	Yes	Yes	No	No	Yes	No	No	Yes	No	No	No	Yes	Negative	NA
FI06176	MANAKARA ATSIMO	VINANITELO	MNK_SS	Sentinel	9	Female	Yes	Primary	Yes	Yes	Yes	No	No	No	No	No	No	No	No	No	No	Negative	NA
FI06177	MANAKARA ATSIMO	VINANITELO	MNK_SS	Sentinel	23	Male	Yes	Primary	Yes	Yes	Yes	Yes	Yes	Yes	No	No	Yes	No	No	No	Yes	Negative	NA
FI06178	MANAKARA ATSIMO	VINANITELO	MNK_SS	Sentinel	24	Female	No	No education	Yes	Yes	Yes	Yes	Yes	Yes	No	No	Yes	No	No	No	Yes	Negative	NA
FI06179	MANAKARA ATSIMO	VINANITELO	MNK_SS	Sentinel	8	Female	Yes	Primary	Yes	Yes	Yes	No	Yes	No	No	No	No	No	No	No	No	Negative	NA
FI06180	MANAKARA ATSIMO	VINANITELO	MNK_SS	Sentinel	14	Female	Yes	Secondary or higher	Yes	Yes	Yes	No	Yes	Yes	No	No	Yes	No	No	No	Yes	Negative	NA
FI06181	MANAKARA ATSIMO	VINANITELO	MNK_SS	Sentinel	38	Male	Yes	Primary	Yes	Yes	Yes	No	Yes	Yes	No	No	Yes	No	No	No	Yes	Negative	NA
FI06182	MANAKARA ATSIMO	VINANITELO	MNK_SS	Sentinel	6	Female	Yes	Primary	Yes	Yes	Yes	No	No	No	No	No	No	No	No	No	No	Negative	NA
FI06183	MANAKARA ATSIMO	VINANITELO	MNK_SS	Sentinel	45	Male	Yes	Primary	Yes	Yes	Yes	Yes	Yes	Yes	No	No	Yes	No	No	No	Yes	Negative	NA
FI06184	MANAKARA ATSIMO	VINANITELO	MNK_SS	Sentinel	10	Female	Yes	Primary	Yes	Yes	Yes	No	Yes	No	No	No	No	No	No	No	No	Negative	NA
FI06185	MANAKARA ATSIMO	VINANITELO	MNK_SS	Sentinel	12	Female	Yes	Primary	Yes	Yes	Yes	No	Yes	No	No	No	No	No	No	No	No	Negative	NA
FI06186	MANAKARA ATSIMO	VINANITELO	MNK_SS	Sentinel	45	NA	Yes	Secondary or higher	Yes	Yes	Yes	Yes	Yes	Yes	No	No	Yes	No	No	No	Yes	Negative	NA
FI06187	MANAKARA ATSIMO	VINANITELO	MNK_SS	Sentinel	39	NA	Yes	Primary	Yes	Yes	Yes	No	NA	Yes	No	No	Yes	No	No	No	Yes	Negative	NA
FI06188	MANAKARA ATSIMO	VINANITELO	MNK_SS	Sentinel	17	Female	Yes	Secondary or higher	Yes	Yes	Yes	Yes	Yes	Yes	No	No	Yes	No	No	No	Yes	Negative	NA
FI06189	MANAKARA ATSIMO	VINANITELO	MNK_SS	Sentinel	13	Female	Yes	Primary	Yes	Yes	Yes	NA	NA	No	No	No	No	No	No	No	No	Negative	NA
FI06190	MANAKARA ATSIMO	VINANITELO	MNK_SS	Sentinel	28	Male	Yes	Secondary or higher	Yes	Yes	Yes	Yes	Yes	Yes	No	No	Yes	No	No	No	NA	Negative	NA
FI06191	MANAKARA ATSIMO	VINANITELO	MNK_SS	Sentinel	18	Female	Yes	Secondary or higher	Yes	Yes	Yes	Yes	Yes	Yes	No	No	Yes	No	No	No	Yes	Negative	NA
FI06192	MANAKARA ATSIMO	VINANITELO	MNK_SS	Sentinel	15	Female	Yes	Primary	Yes	Yes	Yes	NA	NA	No	No	No	No	No	No	No	No	Negative	NA
FI06193	MANAKARA ATSIMO	VINANITELO	MNK_SS	Sentinel	10	Male	Yes	Secondary or higher	Yes	Yes	NA	NA	NA	No	No	No	No	No	No	No	No	Negative	NA
FI06194	MANAKARA ATSIMO	VINANITELO	MNK_SS	Sentinel	8	Female	Yes	Secondary or higher	Yes	Yes	Yes	NA	NA	No	No	No	No	No	No	No	No	Negative	NA
FI06195	MANAKARA ATSIMO	VINANITELO	MNK_SS	Sentinel	22	Female	Yes	Primary	Yes	Yes	Yes	Yes	Yes	Yes	No	No	Yes	No	No	No	Yes	Negative	NA
FI06196	MANAKARA ATSIMO	VINANITELO	MNK_SS	Sentinel	13	Female	Yes	Primary	Yes	Yes	Yes	NA	NA	No	No	No	No	No	No	No	No	Negative	NA
FI06197	MANAKARA ATSIMO	VINANITELO	MNK_SS	Sentinel	7	Male	No	No education	Yes	NA	NA	NA	NA	No	No	No	No	No	No	No	No	Negative	NA
FI06198	MANAKARA ATSIMO	VINANITELO	MNK_SS	Sentinel	13	Female	No	No education	Yes	Yes	NA	NA	NA	No	No	No	No	No	No	No	No	Negative	NA
FI06199	MANAKARA ATSIMO	VINANITELO	MNK_SS	Sentinel	11	Female	Yes	Primary	Yes	Yes	Yes	Yes	Yes	Yes	No	No	Yes	No	No	No	Yes	Negative	NA
FI06200	MANAKARA ATSIMO	VINANITELO	MNK_SS	Sentinel	15	Female	Yes	Primary	Yes	Yes	Yes	NA	NA	No	No	No	No	No	No	No	No	Negative	NA
FI06201	MANAKARA ATSIMO	VINANITELO	MNK_SS	Sentinel	28	Female	No	No education	Yes	Yes	Yes	Yes	Yes	Yes	No	No	Yes	No	No	No	Yes	Negative	NA
FI06202	MANAKARA ATSIMO	VINANITELO	MNK_SS	Sentinel	17	Female	Yes	Secondary or higher	Yes	Yes	Yes	Yes	Yes	No	No	No	No	No	No	No	No	Negative	NA
FI06203	MANAKARA ATSIMO	VINANITELO	MNK_SS	Sentinel	15	Female	Yes	Secondary or higher	Yes	Yes	Yes	No	No	No	No	No	No	No	No	No	No	Negative	NA
FI06204	MANAKARA ATSIMO	VINANITELO	MNK_SS	Sentinel	78	Male	Yes	Primary	Yes	Yes	Yes	Yes	Yes	Yes	No	No	Yes	No	No	No	Yes	Negative	NA
FI06205	MANAKARA ATSIMO	VINANITELO	MNK_SS	Sentinel	60	Male	No	No education	Yes	Yes	Yes	Yes	Yes	Yes	No	No	No	No	No	No	NA	Negative	NA
FI06206	MANAKARA ATSIMO	VINANITELO	MNK_SS	Sentinel	16	Female	Yes	Primary	Yes	Yes	Yes	Yes	Yes	Yes	No	No	Yes	No	No	No	Yes	Negative	NA
FI06207	MANAKARA ATSIMO	VINANITELO	MNK_SS	Sentinel	16	Female	Yes	Primary	Yes	Yes	Yes	Yes	Yes	Yes	No	No	Yes	No	No	No	Yes	Negative	NA
FI06208	MANAKARA ATSIMO	VINANITELO	MNK_SS	Sentinel	20	Male	No	No education	No	No	No	Yes	Yes	No	No	No	No	No	No	No	No	Negative	NA
FI06209	MANAKARA ATSIMO	VINANITELO	MNK_SS	Sentinel	NA	Female	No	No education	Yes	Yes	Yes	Yes	Yes	Yes	No	No	Yes	No	No	No	Yes	Negative	NA
FI06210	MANAKARA ATSIMO	VINANITELO	MNK_SS	Sentinel	46	Female	Yes	Primary	No	No	No	Yes	Yes	Yes	No	No	Yes	No	No	No	Yes	Negative	NA
FI06211	MANAKARA ATSIMO	VINANITELO	MNK_SS	Sentinel	29	Male	Yes	Secondary or higher	Yes	Yes	Yes	Yes	Yes	Yes	Yes	No	Yes	No	No	No	Yes	Negative	NA
FI06212	MANAKARA ATSIMO	VINANITELO	MNK_SS	Sentinel	21	Male	Yes	Secondary or higher	Yes	Yes	NA	Yes	Yes	No	No	No	No	No	No	No	No	Negative	NA
FI06213	MANAKARA ATSIMO	VINANITELO	MNK_SS	Sentinel	28	Male	No	No education	Yes	Yes	Yes	Yes	Yes	NA	NA	NA	NA	NA	NA	NA	NA	Negative	NA
FI06214	MANAKARA ATSIMO	VINANITELO	MNK_SS	Sentinel	20	Male	Yes	Secondary or higher	Yes	Yes	Yes	Yes	Yes	Yes	No	No	Yes	No	No	No	Yes	Negative	NA
FI06215	MANAKARA ATSIMO	VINANITELO	MNK_SS	Sentinel	13	Male	No	No education	Yes	Yes	Yes	Yes	Yes	No	No	No	No	No	No	No	No	Negative	NA
FI06216	MANAKARA ATSIMO	VINANITELO	MNK_SS	Sentinel	6	Female	Yes	Primary	Yes	Yes	Yes	Yes	Yes	No	No	No	No	No	No	No	No	Negative	NA
FI06217	MANAKARA ATSIMO	VINANITELO	MNK_SS	Sentinel	18	Male	Yes	Secondary or higher	Yes	Yes	Yes	Yes	Yes	Yes	No	No	Yes	No	No	No	Yes	Negative	NA
FI06218	MANAKARA ATSIMO	VINANITELO	MNK_SS	Sentinel	15	Female	No	No education	Yes	Yes	Yes	Yes	Yes	Yes	No	No	Yes	No	No	No	Yes	Negative	NA
FI06219	MANAKARA ATSIMO	VINANITELO	MNK_SS	Sentinel	12	Female	Yes	Primary	Yes	Yes	Yes	Yes	Yes	No	No	No	No	No	No	No	No	Negative	NA
FI06220	MANAKARA ATSIMO	VINANITELO	MNK_SS	Sentinel	30	Female	No	No education	Yes	Yes	Yes	Yes	Yes	Yes	No	No	Yes	No	No	No	Yes	Negative	NA
FI06221	MANAKARA ATSIMO	VINANITELO	MNK_SS	Sentinel	13	Female	Yes	Primary	No	No	No	Yes	Yes	Yes	No	No	Yes	No	No	No	Yes	Negative	NA
FI06222	MANAKARA ATSIMO	VINANITELO	MNK_SS	Sentinel	10	Male	No	No education	No	No	No	Yes	Yes	No	No	No	No	No	No	No	No	Negative	NA
FI06223	MANAKARA ATSIMO	VINANITELO	MNK_SS	Sentinel	48	Male	Yes	Primary	No	No	No	Yes	Yes	Yes	No	No	Yes	No	No	No	Yes	Negative	NA
FI06224	MANAKARA ATSIMO	VINANITELO	MNK_SS	Sentinel	40	Female	Yes	Primary	Yes	Yes	NA	Yes	Yes	Yes	No	No	Yes	No	No	No	Yes	Negative	NA
FI06225	MANAKARA ATSIMO	VINANITELO	MNK_SS	Sentinel	17	Male	Yes	Primary	No	No	No	Yes	Yes	Yes	No	No	Yes	No	No	No	Yes	Negative	NA
FI06226	MANAKARA ATSIMO	VINANITELO	MNK_SS	Sentinel	16	Male	No	No education	No	No	No	NA	NA	No	No	No	No	No	No	No	No	Negative	NA
FI06227	MANAKARA ATSIMO	VINANITELO	MNK_SS	Sentinel	14	Male	No	No education	No	No	No	NA	NA	No	No	No	No	No	No	No	No	Negative	NA
FI06228	MANAKARA ATSIMO	VINANITELO	MNK_SS	Sentinel	10	Male	Yes	Primary	Yes	Yes	Yes	NA	Yes	No	No	No	No	No	No	No	No	Negative	NA
FI06229	MANAKARA ATSIMO	VINANITELO	MNK_SS	Sentinel	20	Female	Yes	Secondary or higher	Yes	Yes	Yes	NA	Yes	Yes	No	No	Yes	No	No	No	Yes	Negative	NA
FI06230	MANAKARA ATSIMO	VINANITELO	MNK_SS	Sentinel	15	Female	Yes	Secondary or higher	Yes	Yes	Yes	Yes	Yes	No	No	No	No	No	No	No	No	Negative	NA
FI06231	MANAKARA ATSIMO	VINANITELO	MNK_SS	Sentinel	44	Female	Yes	Secondary or higher	Yes	Yes	Yes	Yes	Yes	Yes	No	No	Yes	No	No	No	Yes	Negative	NA
FI06232	MANAKARA ATSIMO	VINANITELO	MNK_SS	Sentinel	35	Male	Yes	Primary	No	No	No	Yes	Yes	Yes	No	No	Yes	No	No	No	Yes	Negative	NA
FI06233	MANAKARA ATSIMO	VINANITELO	MNK_SS	Sentinel	22	Female	No	No education	Yes	Yes	Yes	Yes	Yes	Yes	No	No	Yes	No	No	No	Yes	Negative	NA
FI06234	MANAKARA ATSIMO	VINANITELO	MNK_SS	Sentinel	18	Female	Yes	Primary	No	No	No	Yes	Yes	No	No	No	No	No	No	No	No	Negative	NA
FI06235	MANAKARA ATSIMO	VINANITELO	MNK_SS	Sentinel	18	Female	No	No education	Yes	Yes	Yes	Yes	Yes	Yes	No	No	Yes	No	No	No	Yes	Negative	NA
FI06236	MANAKARA ATSIMO	VINANITELO	MNK_SS	Sentinel	22	Female	No	No education	Yes	Yes	Yes	Yes	No	Yes	No	No	Yes	No	No	No	Yes	Negative	NA
FI06237	MANAKARA ATSIMO	VINANITELO	MNK_SS	Sentinel	11	Male	Yes	Primary	No	No	No	Yes	No	No	No	No	No	No	No	No	No	Negative	NA
FI06238	MANAKARA ATSIMO	VINANITELO	MNK_SS	Sentinel	11	Male	Yes	Primary	No	No	No	Yes	Yes	No	No	No	No	No	No	No	No	Negative	NA
FI06239	MANAKARA ATSIMO	VINANITELO	MNK_SS	Sentinel	10	Male	Yes	Primary	No	No	No	NA	NA	No	No	No	No	No	No	No	No	Negative	NA
FI06240	MANAKARA ATSIMO	VINANITELO	MNK_SS	Sentinel	30	Male	Yes	Secondary or higher	Yes	Yes	Yes	Yes	Yes	Yes	No	No	Yes	No	No	No	Yes	Negative	NA
FI06241	MANAKARA ATSIMO	VINANITELO	MNK_SS	Sentinel	12	Male	Yes	Secondary or higher	Yes	Yes	Yes	Yes	Yes	Yes	No	Yes	No	No	No	No	Yes	Negative	NA
FI06242	MANAKARA ATSIMO	VINANITELO	MNK_SS	Sentinel	36	Female	Yes	Secondary or higher	Yes	Yes	Yes	Yes	No	Yes	No	No	Yes	No	No	No	Yes	Negative	NA
FI06243	MANAKARA ATSIMO	VINANITELO	MNK_SS	Sentinel	13	Female	Yes	Secondary or higher	Yes	Yes	Yes	Yes	Yes	Yes	No	No	Yes	No	No	No	Yes	Negative	NA
FI06244	MANAKARA ATSIMO	VINANITELO	MNK_SS	Sentinel	25	Female	Yes	Secondary or higher	Yes	Yes	Yes	Yes	Yes	Yes	No	No	Yes	No	No	No	Yes	Negative	NA
FI06245	MANAKARA ATSIMO	VINANITELO	MNK_SS	Sentinel	21	Male	Yes	Secondary or higher	Yes	Yes	Yes	Yes	Yes	No	No	No	No	No	No	No	No	Negative	NA
FI06246	MANAKARA ATSIMO	VINANITELO	MNK_SS	Sentinel	25	Female	Yes	Primary	Yes	Yes	Yes	Yes	Yes	No	No	No	No	No	No	No	No	Negative	NA
FI06247	MANAKARA ATSIMO	VINANITELO	MNK_SS	Sentinel	12	Male	Yes	Secondary or higher	Yes	Yes	Yes	Yes	Yes	No	No	No	No	No	No	No	No	Negative	NA
FI06248	MANAKARA ATSIMO	VINANITELO	MNK_SS	Sentinel	11	Male	Yes	Primary	Yes	Yes	Yes	Yes	Yes	No	No	No	No	No	No	No	No	Negative	NA
FI06249	MANAKARA ATSIMO	VINANITELO	MNK_SS	Sentinel	8	Male	Yes	Primary	Yes	Yes	Yes	Yes	Yes	No	No	No	No	No	No	No	No	Negative	NA
FI06250	MANAKARA ATSIMO	VINANITELO	MNK_SS	Sentinel	11	Female	Yes	Primary	Yes	Yes	Yes	Yes	Yes	No	No	No	No	No	No	No	No	Negative	NA
FI06251	MANAKARA ATSIMO	VINANITELO	MNK_SS	Sentinel	9	Male	Yes	Primary	Yes	Yes	Yes	Yes	Yes	No	No	No	No	No	No	No	No	Negative	NA
FI06252	MANAKARA ATSIMO	VINANITELO	MNK_SS	Sentinel	42	Female	No	No education	Yes	Yes	Yes	Yes	Yes	Yes	No	No	Yes	No	No	No	Yes	Negative	NA
FI06253	MANAKARA ATSIMO	VINANITELO	MNK_SS	Sentinel	13	Male	Yes	Primary	Yes	Yes	Yes	Yes	Yes	No	No	No	No	No	No	No	No	Negative	NA
FI06254	MANAKARA ATSIMO	VINANITELO	MNK_SS	Sentinel	9	Male	Yes	Primary	Yes	Yes	Yes	Yes	Yes	No	No	No	No	No	No	No	No	Negative	NA
FI06255	MANAKARA ATSIMO	VINANITELO	MNK_SS	Sentinel	14	Male	No	No education	Yes	Yes	Yes	Yes	Yes	No	No	No	No	No	No	No	No	Negative	NA
FI06256	MANAKARA ATSIMO	VINANITELO	MNK_SS	Sentinel	14	Female	Yes	Primary	Yes	Yes	Yes	Yes	Yes	Yes	No	No	Yes	No	No	No	Yes	Negative	NA
FI06257	MANAKARA ATSIMO	VINANITELO	MNK_SS	Sentinel	43	Female	Yes	Primary	Yes	Yes	Yes	Yes	Yes	Yes	No	No	Yes	No	No	No	Yes	Negative	NA
FI06258	MANAKARA ATSIMO	VINANITELO	MNK_SS	Sentinel	20	Female	Yes	Primary	Yes	Yes	Yes	Yes	Yes	Yes	No	No	Yes	No	No	No	Yes	Negative	NA
FI06259	MANAKARA ATSIMO	VINANITELO	MNK_SS	Sentinel	42	Male	Yes	Secondary or higher	Yes	Yes	Yes	Yes	Yes	Yes	No	Yes	Yes	No	No	No	Yes	Negative	NA
FI06260	MANAKARA ATSIMO	VINANITELO	MNK_SS	Sentinel	15	Female	Yes	Secondary or higher	Yes	Yes	Yes	Yes	Yes	No	No	No	No	No	No	No	No	Negative	NA
FI06261	MANAKARA ATSIMO	VINANITELO	MNK_SS	Sentinel	10	Female	Yes	Primary	Yes	Yes	Yes	NA	NA	No	No	No	No	No	No	No	No	Negative	NA
FI06262	MANAKARA ATSIMO	VINANITELO	MNK_SS	Sentinel	7	Female	Yes	Primary	Yes	Yes	Yes	NA	NA	No	No	No	No	No	No	No	No	Negative	NA
FI06263	MANAKARA ATSIMO	VINANITELO	MNK_SS	Sentinel	10	Female	No	No education	Yes	Yes	Yes	NA	NA	No	No	No	No	No	No	No	No	Negative	NA
FI06264	MANAKARA ATSIMO	VINANITELO	MNK_SS	Sentinel	30	Male	No	No education	Yes	Yes	Yes	Yes	Yes	Yes	No	No	Yes	No	No	No	Yes	Negative	NA
FI06265	MANAKARA ATSIMO	VINANITELO	MNK_SS	Sentinel	6	Male	Yes	Primary	Yes	Yes	Yes	NA	NA	No	No	No	No	No	No	No	No	Negative	NA
FI06266	MANAKARA ATSIMO	VINANITELO	MNK_SS	Sentinel	5	Female	No	No education	Yes	Yes	Yes	NA	NA	No	No	No	No	No	No	No	No	Negative	NA
FI06267	MANAKARA ATSIMO	VINANITELO	MNK_SS	Sentinel	19	Female	No	No education	Yes	Yes	Yes	NA	Yes	No	No	No	No	No	No	No	No	Negative	NA
FI06268	MANAKARA ATSIMO	VINANITELO	MNK_SS	Sentinel	19	Male	Yes	Primary	Yes	Yes	Yes	Yes	Yes	Yes	No	No	Yes	No	No	No	Yes	Negative	NA
FI06269	MANAKARA ATSIMO	VINANITELO	MNK_SS	Sentinel	26	Male	Yes	Primary	No	No	No	No	No	No	No	No	No	No	No	No	No	Negative	NA
FI06270	MANAKARA ATSIMO	VINANITELO	MNK_SS	Sentinel	16	Male	Yes	Secondary or higher	Yes	Yes	Yes	No	No	No	No	No	No	No	No	No	No	Negative	NA
FI06271	MANAKARA ATSIMO	VINANITELO	MNK_SS	Sentinel	19	Male	No	No education	Yes	Yes	NA	NA	NA	No	No	No	No	No	No	No	No	Negative	NA
FI06272	MANAKARA ATSIMO	VINANITELO	MNK_SS	Sentinel	40	Female	No	No education	No	No	No	Yes	Yes	Yes	No	No	Yes	No	No	No	Yes	Negative	NA
FI06273	MANAKARA ATSIMO	VINANITELO	MNK_SS	Sentinel	45	Female	No	No education	Yes	Yes	Yes	Yes	Yes	Yes	No	No	Yes	No	No	No	Yes	Negative	NA
FI06274	MANAKARA ATSIMO	VINANITELO	MNK_SS	Sentinel	39	Female	No	No education	Yes	Yes	Yes	Yes	Yes	Yes	No	No	Yes	No	No	No	Yes	Negative	NA
FI06275	MANAKARA ATSIMO	VINANITELO	MNK_SS	Sentinel	28	Male	Yes	Secondary or higher	Yes	Yes	NA	Yes	No	Yes	No	No	Yes	No	No	No	Yes	Negative	NA
FI06276	MANAKARA ATSIMO	VINANITELO	MNK_SS	Sentinel	48	Female	Yes	Primary	Yes	Yes	Yes	Yes	Yes	Yes	No	No	Yes	No	No	No	Yes	Negative	NA
FI06277	MANAKARA ATSIMO	VINANITELO	MNK_SS	Sentinel	12	Female	Yes	Secondary or higher	Yes	Yes	Yes	Yes	Yes	No	No	No	No	No	No	No	No	Negative	NA
FI06278	MANAKARA ATSIMO	VINANITELO	MNK_SS	Sentinel	11	Female	Yes	Secondary or higher	Yes	Yes	Yes	Yes	Yes	No	No	No	No	No	No	No	No	Negative	NA
FI06279	MANAKARA ATSIMO	VINANITELO	MNK_SS	Sentinel	11	Female	Yes	Secondary or higher	Yes	Yes	Yes	Yes	Yes	No	No	No	No	No	No	No	No	Negative	NA
FI06280	MANAKARA ATSIMO	VINANITELO	MNK_SS	Sentinel	30	Female	No	No education	Yes	Yes	Yes	Yes	Yes	Yes	No	Yes	No	No	No	No	Yes	Negative	NA
FI06281	MANAKARA ATSIMO	VINANITELO	MNK_SS	Sentinel	42	Male	Yes	Secondary or higher	Yes	Yes	Yes	Yes	Yes	Yes	No	No	Yes	No	No	No	Yes	Negative	NA
FI06282	MANAKARA ATSIMO	VINANITELO	MNK_SS	Sentinel	26	Male	Yes	Secondary or higher	Yes	Yes	Yes	Yes	Yes	Yes	No	Yes	No	No	No	No	Yes	Negative	NA
FI06283	MANAKARA ATSIMO	VINANITELO	MNK_SS	Sentinel	26	Male	Yes	Secondary or higher	Yes	Yes	Yes	Yes	Yes	Yes	No	Yes	No	No	No	No	Yes	Negative	NA
FI06284	MANAKARA ATSIMO	VINANITELO	MNK_SS	Sentinel	53	Male	Yes	Secondary or higher	Yes	Yes	NA	Yes	Yes	Yes	No	No	No	Yes	No	No	Yes	Negative	NA
FI06285	MANAKARA ATSIMO	VINANITELO	MNK_SS	Sentinel	52	Male	Yes	Secondary or higher	Yes	Yes	Yes	Yes	Yes	Yes	No	No	No	Yes	No	No	Yes	Negative	NA
FI06286	MANAKARA ATSIMO	VINANITELO	MNK_SS	Sentinel	47	Male	Yes	Primary	Yes	Yes	Yes	Yes	Yes	Yes	No	No	No	Yes	No	No	Yes	Negative	NA
FI06287	MANAKARA ATSIMO	VINANITELO	MNK_SS	Sentinel	51	Male	No	No education	Yes	Yes	Yes	Yes	Yes	Yes	No	No	No	No	No	No	Yes	Negative	NA
FI06288	MANAKARA ATSIMO	VINANITELO	MNK_SS	Sentinel	65	Male	No	No education	Yes	Yes	Yes	Yes	Yes	Yes	No	No	Yes	No	No	No	Yes	Negative	NA
FI06289	MANAKARA ATSIMO	VINANITELO	MNK_SS	Sentinel	NA	Male	Yes	Secondary or higher	Yes	Yes	Yes	Yes	Yes	Yes	No	Yes	No	Yes	No	No	Yes	Negative	NA
FI06290	MANAKARA ATSIMO	VINANITELO	MNK_SS	Sentinel	45	Female	Yes	Secondary or higher	Yes	Yes	Yes	Yes	Yes	Yes	No	No	No	Yes	No	No	Yes	Negative	NA
FI06291	MANAKARA ATSIMO	VINANITELO	MNK_SS	Sentinel	8	Male	Yes	Primary	Yes	Yes	Yes	No	Yes	No	No	No	No	No	No	No	No	Negative	NA
FI06292	MANAKARA ATSIMO	VINANITELO	MNK_SS	Sentinel	21	Male	Yes	Secondary or higher	Yes	Yes	Yes	Yes	Yes	Yes	No	Yes	No	No	No	No	Yes	Negative	NA
FI06293	MANAKARA ATSIMO	VINANITELO	MNK_SS	Sentinel	18	Male	Yes	Secondary or higher	Yes	Yes	Yes	Yes	Yes	Yes	Yes	No	No	No	No	No	Yes	Negative	NA
FI06294	MANAKARA ATSIMO	VINANITELO	MNK_SS	Sentinel	23	Male	Yes	Secondary or higher	Yes	Yes	Yes	NA	NA	Yes	No	Yes	No	No	No	No	Yes	Negative	NA
FI06295	MANAKARA ATSIMO	VINANITELO	MNK_SS	Sentinel	56	Male	Yes	Primary	Yes	Yes	Yes	Yes	Yes	Yes	Yes	No	No	No	No	No	Yes	Negative	NA
FI06296	MANAKARA ATSIMO	VINANITELO	MNK_SS	Sentinel	56	Male	No	No education	Yes	Yes	Yes	Yes	Yes	Yes	No	No	Yes	No	No	No	Yes	Negative	NA
FI06297	MANAKARA ATSIMO	VINANITELO	MNK_SS	Sentinel	28	Female	No	No education	Yes	Yes	Yes	Yes	Yes	Yes	No	No	No	Yes	No	No	Yes	Negative	NA
FI06298	MANAKARA ATSIMO	VINANITELO	MNK_SS	Sentinel	24	Female	Yes	Primary	Yes	Yes	Yes	Yes	Yes	Yes	Yes	No	No	No	No	No	Yes	Negative	NA
FI06299	MANAKARA ATSIMO	VINANITELO	MNK_SS	Sentinel	25	Female	Yes	Primary	Yes	Yes	Yes	Yes	Yes	Yes	No	Yes	No	No	No	No	Yes	Negative	NA
FI06300	MANAKARA ATSIMO	VINANITELO	MNK_SS	Sentinel	11	NA	Yes	Primary	Yes	Yes	Yes	NA	Yes	Yes	No	No	No	No	No	No	Yes	Negative	NA
FI06301	MANAKARA ATSIMO	AMBILA	MNK_SCS1	Spot-check	NA	Male	Yes	Primary	Yes	Yes	Yes	Yes	Yes	Yes	No	No	Yes	No	No	No	Yes	Negative	NA
FI06302	MANAKARA ATSIMO	AMBILA	MNK_SCS1	Spot-check	34	Female	No	No education	Yes	Yes	Yes	No	No	Yes	No	No	Yes	No	No	No	No	Negative	NA
FI06303	MANAKARA ATSIMO	AMBILA	MNK_SCS1	Spot-check	51	Male	No	No education	Yes	Yes	Yes	Yes	Yes	Yes	No	No	Yes	No	No	No	Yes	Negative	NA
FI06304	MANAKARA ATSIMO	AMBILA	MNK_SCS1	Spot-check	44	Female	Yes	Primary	Yes	Yes	Yes	Yes	Yes	Yes	No	No	Yes	No	No	No	Yes	Negative	NA
FI06305	MANAKARA ATSIMO	AMBILA	MNK_SCS1	Spot-check	46	Male	Yes	Primary	Yes	Yes	Yes	Yes	Yes	Yes	No	No	Yes	No	No	No	Yes	Negative	NA
FI06306	MANAKARA ATSIMO	AMBILA	MNK_SCS1	Spot-check	37	Male	Yes	Primary	Yes	Yes	Yes	Yes	Yes	Yes	No	No	Yes	No	No	No	Yes	Negative	NA
FI06307	MANAKARA ATSIMO	AMBILA	MNK_SCS1	Spot-check	44	Male	No	No education	Yes	Yes	Yes	Yes	Yes	Yes	No	No	Yes	No	No	No	Yes	Negative	NA
FI06308	MANAKARA ATSIMO	AMBILA	MNK_SCS1	Spot-check	34	Male	No	No education	No	No	No	No	NA	Yes	No	No	No	Yes	No	No	No	Negative	NA
FI06309	MANAKARA ATSIMO	AMBILA	MNK_SCS1	Spot-check	47	Female	Yes	Primary	Yes	Yes	Yes	Yes	Yes	Yes	No	No	No	No	No	No	Yes	Negative	NA
FI06310	MANAKARA ATSIMO	AMBILA	MNK_SCS1	Spot-check	7	Female	Yes	Primary	Yes	Yes	Yes	No	No	No	No	No	No	No	No	No	No	Negative	NA
FI06311	MANAKARA ATSIMO	AMBILA	MNK_SCS1	Spot-check	18	Male	Yes	Primary	Yes	Yes	Yes	Yes	Yes	Yes	No	Yes	No	No	No	No	NA	Negative	NA
FI06312	MANAKARA ATSIMO	AMBILA	MNK_SCS1	Spot-check	65	Female	No	No education	Yes	Yes	Yes	Yes	Yes	Yes	No	No	No	No	No	No	Yes	Negative	NA
FI06313	MANAKARA ATSIMO	AMBILA	MNK_SCS1	Spot-check	29	Female	No	No education	Yes	Yes	Yes	No	No	Yes	No	No	Yes	No	No	No	No	Negative	NA
FI06314	MANAKARA ATSIMO	AMBILA	MNK_SCS1	Spot-check	12	Female	Yes	Primary	Yes	Yes	Yes	Yes	Yes	No	No	No	No	No	No	No	No	Negative	NA
FI06315	MANAKARA ATSIMO	AMBILA	MNK_SCS1	Spot-check	32	Female	Yes	Primary	Yes	Yes	Yes	Yes	Yes	Yes	No	No	Yes	No	No	No	Yes	Negative	NA
FI06316	MANAKARA ATSIMO	AMBILA	MNK_SCS1	Spot-check	18	Female	Yes	Primary	Yes	Yes	Yes	Yes	Yes	Yes	No	No	Yes	No	No	No	Yes	Negative	NA
FI06317	MANAKARA ATSIMO	AMBILA	MNK_SCS1	Spot-check	20	Female	No	No education	Yes	Yes	Yes	Yes	Yes	No	No	No	No	No	No	No	No	Negative	NA
FI06318	MANAKARA ATSIMO	AMBILA	MNK_SCS1	Spot-check	30	Male	No	No education	Yes	Yes	Yes	Yes	Yes	Yes	No	No	Yes	No	No	No	Yes	Negative	NA
FI06319	MANAKARA ATSIMO	AMBILA	MNK_SCS1	Spot-check	16	Female	Yes	Secondary or higher	Yes	Yes	Yes	Yes	Yes	No	No	No	No	No	No	No	No	Negative	NA
FI06320	MANAKARA ATSIMO	AMBILA	MNK_SCS1	Spot-check	46	Female	Yes	Primary	Yes	Yes	Yes	Yes	Yes	Yes	No	No	No	No	No	No	Yes	Negative	NA
FI06321	MANAKARA ATSIMO	AMBILA	MNK_SCS1	Spot-check	69	Male	Yes	Primary	Yes	Yes	Yes	No	No	Yes	No	No	Yes	No	No	No	NA	Negative	NA
FI06322	MANAKARA ATSIMO	AMBILA	MNK_SCS1	Spot-check	58	Male	Yes	Secondary or higher	Yes	Yes	Yes	Yes	Yes	Yes	No	No	No	Yes	No	No	Yes	Negative	NA
FI06323	MANAKARA ATSIMO	AMBILA	MNK_SCS1	Spot-check	NA	Male	Yes	Primary	Yes	Yes	Yes	Yes	Yes	Yes	No	No	Yes	No	No	No	Yes	Negative	NA
FI06324	MANAKARA ATSIMO	AMBILA	MNK_SCS1	Spot-check	5	Male	NA	NA	Yes	Yes	Yes	No	No	No	No	No	No	No	No	No	No	Negative	NA
FI06325	MANAKARA ATSIMO	AMBILA	MNK_SCS1	Spot-check	37	Female	No	No education	Yes	Yes	Yes	Yes	Yes	Yes	No	No	No	No	No	No	Yes	Negative	NA
FI06326	MANAKARA ATSIMO	AMBILA	MNK_SCS1	Spot-check	67	Male	Yes	Primary	Yes	Yes	Yes	Yes	Yes	Yes	No	No	Yes	No	No	No	Yes	Negative	NA
FI06327	MANAKARA ATSIMO	AMBILA	MNK_SCS1	Spot-check	16	Male	Yes	Primary	Yes	Yes	Yes	Yes	Yes	No	No	No	No	No	No	No	No	Negative	NA
FI06328	MANAKARA ATSIMO	AMBILA	MNK_SCS1	Spot-check	46	Male	Yes	Secondary or higher	Yes	Yes	Yes	Yes	No	Yes	No	No	Yes	No	No	No	Yes	Negative	NA
FI06329	MANAKARA ATSIMO	AMBILA	MNK_SCS1	Spot-check	NA	NA	No	No education	Yes	Yes	Yes	Yes	Yes	Yes	No	No	Yes	No	No	No	Yes	Negative	NA
FI06330	MANAKARA ATSIMO	AMBILA	MNK_SCS1	Spot-check	5	Male	Yes	Primary	Yes	Yes	Yes	No	No	No	No	No	No	No	No	No	No	Negative	NA
FI06331	MANAKARA ATSIMO	AMBILA	MNK_SCS1	Spot-check	33	Female	No	No education	Yes	Yes	Yes	No	No	No	No	No	No	No	No	No	No	Negative	NA
FI06332	MANAKARA ATSIMO	AMBILA	MNK_SCS1	Spot-check	18	Female	No	No education	Yes	Yes	Yes	Yes	Yes	No	No	No	No	No	No	No	No	Negative	NA
FI06333	MANAKARA ATSIMO	AMBILA	MNK_SCS1	Spot-check	6	Male	Yes	Primary	Yes	Yes	Yes	No	No	No	No	No	No	No	No	No	No	Negative	NA
FI06334	MANAKARA ATSIMO	AMBILA	MNK_SCS1	Spot-check	NA	NA	No	No education	Yes	Yes	Yes	No	No	Yes	No	No	Yes	No	No	No	Yes	Negative	NA
FI06335	MANAKARA ATSIMO	AMBILA	MNK_SCS1	Spot-check	60	Male	No	No education	Yes	Yes	Yes	Yes	Yes	Yes	No	No	Yes	No	No	No	Yes	Negative	NA
FI06336	MANAKARA ATSIMO	AMBILA	MNK_SCS1	Spot-check	48	Female	Yes	Primary	Yes	Yes	Yes	Yes	Yes	Yes	No	No	Yes	No	No	No	Yes	Negative	NA
FI06337	MANAKARA ATSIMO	AMBILA	MNK_SCS1	Spot-check	8	Male	Yes	Primary	Yes	Yes	Yes	Yes	Yes	No	No	No	No	No	No	No	No	Negative	NA
FI06338	MANAKARA ATSIMO	AMBILA	MNK_SCS1	Spot-check	29	Male	No	No education	Yes	Yes	Yes	Yes	Yes	Yes	No	No	Yes	No	No	No	Yes	Negative	NA
FI06339	MANAKARA ATSIMO	AMBILA	MNK_SCS1	Spot-check	45	Male	No	No education	Yes	Yes	Yes	Yes	Yes	Yes	No	No	Yes	No	No	No	NA	Negative	NA
FI06340	MANAKARA ATSIMO	AMBILA	MNK_SCS1	Spot-check	29	Female	No	No education	Yes	Yes	Yes	Yes	Yes	Yes	No	No	Yes	No	No	No	Yes	Negative	NA
FI06341	MANAKARA ATSIMO	AMBILA	MNK_SCS1	Spot-check	56	Male	Yes	Secondary or higher	Yes	Yes	Yes	Yes	Yes	Yes	No	No	Yes	No	No	No	Yes	Negative	NA
FI06342	MANAKARA ATSIMO	AMBILA	MNK_SCS1	Spot-check	37	Female	Yes	Primary	Yes	Yes	Yes	Yes	Yes	Yes	No	Yes	Yes	No	No	No	Yes	Negative	NA
FI06343	MANAKARA ATSIMO	AMBILA	MNK_SCS1	Spot-check	25	Male	Yes	Primary	Yes	Yes	Yes	No	No	No	No	No	No	No	No	No	No	Negative	NA
FI06344	MANAKARA ATSIMO	AMBILA	MNK_SCS1	Spot-check	5	Male	Yes	Primary	Yes	Yes	Yes	Yes	No	No	No	No	No	No	No	No	No	Negative	NA
FI06345	MANAKARA ATSIMO	AMBILA	MNK_SCS1	Spot-check	55	Male	No	No education	Yes	Yes	Yes	No	No	Yes	No	No	Yes	No	No	No	No	Negative	NA
FI06346	MANAKARA ATSIMO	AMBILA	MNK_SCS1	Spot-check	49	Male	Yes	Primary	Yes	Yes	Yes	Yes	Yes	Yes	No	No	Yes	No	No	No	Yes	Negative	NA
FI06347	MANAKARA ATSIMO	AMBILA	MNK_SCS1	Spot-check	16	Female	No	No education	Yes	Yes	Yes	No	No	Yes	No	No	Yes	No	No	No	NA	Negative	NA
FI06348	MANAKARA ATSIMO	AMBILA	MNK_SCS1	Spot-check	9	Male	No	No education	Yes	Yes	Yes	Yes	No	No	No	No	No	No	No	No	No	Negative	NA
FI06349	MANAKARA ATSIMO	AMBILA	MNK_SCS1	Spot-check	61	Male	Yes	Primary	Yes	Yes	Yes	Yes	Yes	Yes	No	No	Yes	No	No	No	Yes	Negative	NA
FI06350	MANAKARA ATSIMO	AMBILA	MNK_SCS1	Spot-check	47	Male	Yes	Primary	Yes	Yes	Yes	Yes	Yes	Yes	No	Yes	Yes	No	No	No	Yes	Negative	NA
FI06351	MANAKARA ATSIMO	AMBILA	MNK_SCS1	Spot-check	56	Female	Yes	Secondary or higher	Yes	Yes	Yes	Yes	Yes	Yes	No	No	Yes	No	No	No	Yes	Negative	NA
FI06352	MANAKARA ATSIMO	AMBILA	MNK_SCS1	Spot-check	18	Female	No	No education	Yes	Yes	Yes	Yes	Yes	Yes	No	Yes	No	No	No	No	Yes	Negative	NA
FI06353	MANAKARA ATSIMO	AMBILA	MNK_SCS1	Spot-check	36	Female	Yes	Primary	Yes	Yes	Yes	Yes	Yes	Yes	No	No	No	Yes	No	No	Yes	Negative	NA
FI06354	MANAKARA ATSIMO	AMBILA	MNK_SCS1	Spot-check	49	Female	No	No education	Yes	Yes	Yes	Yes	Yes	Yes	No	No	No	Yes	No	No	Yes	Negative	NA
FI06355	MANAKARA ATSIMO	AMBILA	MNK_SCS1	Spot-check	22	Male	Yes	Secondary or higher	No	No	No	No	NA	Yes	No	No	Yes	No	No	No	Yes	Negative	NA
FI06356	MANAKARA ATSIMO	AMBILA	MNK_SCS1	Spot-check	18	Female	Yes	Primary	Yes	NA	NA	No	No	Yes	No	Yes	No	No	No	No	No	Negative	NA
FI06357	MANAKARA ATSIMO	AMBILA	MNK_SCS1	Spot-check	10	Female	Yes	Primary	Yes	Yes	Yes	Yes	Yes	No	No	No	No	No	No	No	No	Negative	NA
FI06358	MANAKARA ATSIMO	AMBILA	MNK_SCS1	Spot-check	10	Female	Yes	Primary	Yes	Yes	Yes	Yes	Yes	No	No	No	No	No	No	No	No	Negative	NA
FI06359	MANAKARA ATSIMO	AMBILA	MNK_SCS1	Spot-check	10	Male	Yes	Secondary or higher	Yes	Yes	Yes	Yes	Yes	No	No	No	No	No	No	No	No	Negative	NA
FI06360	MANAKARA ATSIMO	AMBILA	MNK_SCS1	Spot-check	71	Female	Yes	Primary	Yes	Yes	Yes	Yes	Yes	Yes	No	Yes	No	No	No	No	Yes	Negative	NA
FI06361	MANAKARA ATSIMO	AMBILA	MNK_SCS1	Spot-check	NA	Female	No	No education	Yes	Yes	Yes	Yes	Yes	Yes	No	No	Yes	No	No	No	Yes	Negative	NA
FI06362	MANAKARA ATSIMO	AMBILA	MNK_SCS1	Spot-check	31	Male	Yes	Primary	Yes	Yes	Yes	Yes	Yes	Yes	No	Yes	No	No	No	No	Yes	Negative	NA
FI06363	MANAKARA ATSIMO	AMBILA	MNK_SCS1	Spot-check	31	Male	No	No education	Yes	Yes	Yes	Yes	Yes	Yes	No	No	Yes	No	No	No	Yes	Negative	NA
FI06364	MANAKARA ATSIMO	AMBILA	MNK_SCS1	Spot-check	27	Male	Yes	Primary	Yes	Yes	Yes	Yes	Yes	Yes	No	No	Yes	No	No	No	Yes	Negative	NA
FI06365	MANAKARA ATSIMO	AMBILA	MNK_SCS1	Spot-check	59	Male	No	No education	Yes	Yes	Yes	Yes	Yes	Yes	No	No	Yes	No	No	No	Yes	Negative	NA
FI06366	MANAKARA ATSIMO	AMBILA	MNK_SCS1	Spot-check	31	Male	Yes	Secondary or higher	Yes	Yes	Yes	Yes	Yes	Yes	No	No	Yes	No	No	No	Yes	Negative	NA
FI06367	MANAKARA ATSIMO	AMBILA	MNK_SCS1	Spot-check	50	Female	Yes	Primary	Yes	Yes	Yes	Yes	Yes	Yes	No	No	Yes	No	No	No	Yes	Negative	NA
FI06368	MANAKARA ATSIMO	AMBILA	MNK_SCS1	Spot-check	10	Female	Yes	Primary	Yes	Yes	Yes	Yes	Yes	No	No	No	No	No	No	No	No	Negative	NA
FI06369	MANAKARA ATSIMO	AMBILA	MNK_SCS1	Spot-check	16	Female	Yes	Primary	Yes	Yes	Yes	Yes	Yes	Yes	No	No	Yes	No	No	No	Yes	Negative	NA
FI06370	MANAKARA ATSIMO	AMBILA	MNK_SCS1	Spot-check	52	Male	No	No education	Yes	Yes	Yes	Yes	Yes	Yes	No	No	Yes	No	No	No	Yes	Negative	NA
FI06371	MANAKARA ATSIMO	AMBILA	MNK_SCS1	Spot-check	20	Male	No	No education	Yes	Yes	Yes	No	NA	No	No	No	No	No	No	No	No	Negative	NA
FI06372	MANAKARA ATSIMO	AMBILA	MNK_SCS1	Spot-check	60	Male	Yes	Secondary or higher	Yes	Yes	Yes	Yes	Yes	Yes	No	No	No	Yes	No	No	Yes	Negative	NA
FI06373	MANAKARA ATSIMO	AMBILA	MNK_SCS1	Spot-check	18	Male	Yes	Secondary or higher	Yes	Yes	Yes	No	No	Yes	No	No	Yes	No	No	No	Yes	Negative	NA
FI06374	MANAKARA ATSIMO	AMBILA	MNK_SCS1	Spot-check	1	Male	No	No education	Yes	Yes	Yes	Yes	Yes	No	No	No	No	No	No	No	No	Negative	NA
FI06375	MANAKARA ATSIMO	AMBILA	MNK_SCS1	Spot-check	34	Male	Yes	Primary	Yes	Yes	Yes	No	No	Yes	No	No	Yes	No	No	No	Yes	Negative	NA
FI06376	MANAKARA ATSIMO	AMBILA	MNK_SCS1	Spot-check	52	Female	Yes	Secondary or higher	Yes	Yes	Yes	No	Yes	Yes	No	No	Yes	No	No	No	Yes	Negative	NA
FI06377	MANAKARA ATSIMO	AMBILA	MNK_SCS1	Spot-check	35	Male	Yes	Primary	Yes	Yes	Yes	Yes	Yes	Yes	No	No	Yes	No	No	No	Yes	Negative	NA
FI06378	MANAKARA ATSIMO	AMBILA	MNK_SCS1	Spot-check	24	Female	Yes	Primary	Yes	Yes	Yes	Yes	Yes	Yes	No	No	Yes	No	No	No	Yes	Negative	NA
FI06379	MANAKARA ATSIMO	AMBILA	MNK_SCS1	Spot-check	23	Male	Yes	Secondary or higher	Yes	Yes	Yes	No	No	Yes	No	No	Yes	No	No	No	Yes	Negative	NA
FI06380	MANAKARA ATSIMO	AMBILA	MNK_SCS1	Spot-check	19	Male	No	No education	Yes	Yes	Yes	Yes	Yes	Yes	No	No	Yes	No	No	No	Yes	Negative	NA
FI06381	MANAKARA ATSIMO	AMBILA	MNK_SCS1	Spot-check	20	Male	Yes	Primary	No	No	No	Yes	No	No	No	No	No	No	No	No	No	Negative	NA
FI06382	MANAKARA ATSIMO	AMBILA	MNK_SCS1	Spot-check	38	Male	Yes	Primary	Yes	Yes	Yes	Yes	Yes	NA	NA	NA	NA	NA	NA	NA	NA	Negative	NA
FI06383	MANAKARA ATSIMO	AMBILA	MNK_SCS1	Spot-check	20	Female	No	No education	Yes	Yes	Yes	No	No	No	No	No	No	No	No	No	No	Negative	NA
FI06384	MANAKARA ATSIMO	AMBILA	MNK_SCS1	Spot-check	26	Male	Yes	Secondary or higher	Yes	Yes	Yes	No	Yes	Yes	No	No	Yes	No	No	No	Yes	Negative	NA
FI06385	MANAKARA ATSIMO	AMBILA	MNK_SCS1	Spot-check	32	Male	Yes	Secondary or higher	Yes	Yes	Yes	Yes	Yes	Yes	No	No	Yes	No	No	No	Yes	Negative	NA
FI06386	MANAKARA ATSIMO	AMBILA	MNK_SCS1	Spot-check	22	Female	No	No education	Yes	Yes	Yes	Yes	NA	No	No	No	No	No	No	No	No	Negative	NA
FI06387	MANAKARA ATSIMO	AMBILA	MNK_SCS1	Spot-check	NA	Male	No	No education	Yes	Yes	Yes	No	No	Yes	No	No	Yes	No	No	No	No	Negative	NA
FI06388	MANAKARA ATSIMO	AMBILA	MNK_SCS1	Spot-check	80	Male	No	No education	Yes	Yes	Yes	No	No	Yes	No	No	Yes	No	No	No	No	Negative	NA
FI06389	MANAKARA ATSIMO	AMBILA	MNK_SCS1	Spot-check	31	Male	No	No education	Yes	Yes	Yes	Yes	Yes	Yes	No	Yes	No	No	No	No	Yes	Negative	NA
FI06390	MANAKARA ATSIMO	AMBILA	MNK_SCS1	Spot-check	14	Male	Yes	Secondary or higher	Yes	Yes	Yes	NA	Yes	No	No	No	No	No	No	No	No	Negative	NA
FI06391	MANAKARA ATSIMO	AMBILA	MNK_SCS1	Spot-check	7	Male	Yes	Primary	Yes	Yes	Yes	Yes	Yes	No	No	No	No	No	No	No	No	Negative	NA
FI06392	MANAKARA ATSIMO	AMBILA	MNK_SCS1	Spot-check	35	Male	Yes	Secondary or higher	Yes	Yes	Yes	No	No	Yes	No	No	Yes	No	No	No	NA	Negative	NA
FI06393	MANAKARA ATSIMO	AMBILA	MNK_SCS1	Spot-check	26	Female	No	No education	Yes	Yes	Yes	No	NA	No	No	No	No	No	No	No	No	Negative	NA
FI06394	MANAKARA ATSIMO	AMBILA	MNK_SCS1	Spot-check	22	Female	No	No education	Yes	Yes	Yes	Yes	Yes	Yes	No	No	No	No	No	No	Yes	Negative	NA
FI06395	MANAKARA ATSIMO	AMBILA	MNK_SCS1	Spot-check	5	Female	No	No education	Yes	Yes	Yes	NA	Yes	No	No	No	No	No	No	No	No	Negative	NA
FI06396	MANAKARA ATSIMO	AMBILA	MNK_SCS1	Spot-check	37	Female	Yes	Primary	Yes	Yes	Yes	Yes	Yes	Yes	No	Yes	No	No	No	No	Yes	Negative	NA
FI06397	MANAKARA ATSIMO	AMBILA	MNK_SCS1	Spot-check	45	Female	No	No education	Yes	Yes	Yes	Yes	Yes	No	No	No	No	No	No	No	No	Negative	NA
FI06398	MANAKARA ATSIMO	AMBILA	MNK_SCS1	Spot-check	30	Female	Yes	Primary	Yes	Yes	Yes	Yes	Yes	Yes	Yes	No	No	No	No	No	Yes	Negative	NA
FI06399	MANAKARA ATSIMO	AMBILA	MNK_SCS1	Spot-check	35	Male	No	No education	Yes	Yes	Yes	Yes	Yes	Yes	No	Yes	No	No	No	No	Yes	Negative	NA
FI06400	MANAKARA ATSIMO	AMBILA	MNK_SCS1	Spot-check	20	Male	No	No education	Yes	Yes	Yes	Yes	Yes	Yes	No	Yes	No	No	No	No	Yes	Negative	NA
FI06401	MANAKARA ATSIMO	AMBILA	MNK_SCS1	Spot-check	21	Female	No	No education	Yes	Yes	Yes	Yes	Yes	Yes	No	No	Yes	No	No	No	Yes	Negative	NA
FI06402	MANAKARA ATSIMO	AMBILA	MNK_SCS1	Spot-check	5	Male	Yes	Primary	Yes	Yes	Yes	NA	Yes	No	No	No	No	No	No	No	No	Negative	NA
FI06403	MANAKARA ATSIMO	AMBILA	MNK_SCS1	Spot-check	7	Female	Yes	Primary	Yes	Yes	Yes	Yes	Yes	No	No	No	No	No	No	No	No	Negative	NA
FI06404	MANAKARA ATSIMO	AMBILA	MNK_SCS1	Spot-check	10	Female	Yes	Primary	Yes	Yes	Yes	Yes	Yes	No	No	No	No	No	No	No	No	Negative	NA
FI06405	MANAKARA ATSIMO	AMBILA	MNK_SCS1	Spot-check	5	Female	Yes	Primary	Yes	Yes	Yes	NA	Yes	No	No	No	No	No	No	No	No	Negative	NA
FI06406	MANAKARA ATSIMO	AMBILA	MNK_SCS1	Spot-check	5	Female	Yes	Primary	Yes	Yes	Yes	NA	Yes	No	No	No	No	No	No	No	No	Negative	NA
FI06407	MANAKARA ATSIMO	AMBILA	MNK_SCS1	Spot-check	5	Male	Yes	Primary	Yes	Yes	Yes	No	Yes	No	No	No	No	No	No	No	No	Negative	NA
FI06408	MANAKARA ATSIMO	AMBILA	MNK_SCS1	Spot-check	18	Female	No	No education	Yes	Yes	Yes	Yes	Yes	Yes	No	No	Yes	No	No	No	Yes	Negative	NA
FI06409	MANAKARA ATSIMO	AMBILA	MNK_SCS1	Spot-check	24	Male	Yes	Primary	Yes	Yes	Yes	Yes	Yes	Yes	No	No	Yes	No	No	No	Yes	Negative	NA
FI06410	MANAKARA ATSIMO	AMBILA	MNK_SCS1	Spot-check	30	Male	No	No education	Yes	Yes	Yes	Yes	Yes	Yes	No	Yes	No	No	No	No	Yes	Negative	NA
FI06411	MANAKARA ATSIMO	AMBILA	MNK_SCS1	Spot-check	NA	Female	Yes	Primary	Yes	Yes	Yes	Yes	Yes	No	No	No	No	No	No	No	No	Negative	NA
FI06412	MANAKARA ATSIMO	AMBILA	MNK_SCS1	Spot-check	12	Male	Yes	Primary	Yes	Yes	Yes	NA	NA	No	No	No	No	No	No	No	No	Negative	NA
FI06413	MANAKARA ATSIMO	AMBILA	MNK_SCS1	Spot-check	28	NA	Yes	Primary	Yes	Yes	Yes	Yes	No	Yes	No	No	Yes	No	No	No	Yes	Negative	NA
FI06414	MANAKARA ATSIMO	AMBILA	MNK_SCS1	Spot-check	45	Male	No	No education	Yes	Yes	Yes	Yes	No	Yes	No	No	No	No	No	No	Yes	Negative	NA
FI06415	MANAKARA ATSIMO	AMBILA	MNK_SCS1	Spot-check	32	Male	Yes	Primary	Yes	Yes	Yes	NA	NA	No	No	No	No	No	No	No	No	Negative	NA
FI06416	MANAKARA ATSIMO	AMBILA	MNK_SCS1	Spot-check	30	Female	No	No education	Yes	Yes	Yes	No	No	Yes	No	No	Yes	No	No	No	Yes	Negative	NA
FI06417	MANAKARA ATSIMO	AMBILA	MNK_SCS1	Spot-check	12	Female	Yes	Primary	Yes	Yes	Yes	Yes	Yes	No	No	No	No	No	No	No	No	Negative	NA
FI06418	MANAKARA ATSIMO	AMBILA	MNK_SCS1	Spot-check	10	Female	Yes	Primary	Yes	Yes	Yes	Yes	Yes	NA	NA	NA	NA	NA	NA	NA	NA	Negative	NA
FI06419	MANAKARA ATSIMO	AMBILA	MNK_SCS1	Spot-check	10	Female	Yes	Primary	Yes	Yes	Yes	NA	Yes	NA	NA	NA	NA	NA	NA	NA	NA	Negative	NA
FI06420	MANAKARA ATSIMO	AMBILA	MNK_SCS1	Spot-check	5	Female	Yes	Primary	Yes	Yes	Yes	Yes	Yes	NA	NA	NA	NA	NA	NA	NA	NA	Negative	NA
FI06421	MANAKARA ATSIMO	AMBILA	MNK_SCS1	Spot-check	8	Female	No	No education	Yes	Yes	Yes	No	No	No	No	No	No	No	No	No	No	Negative	NA
FI06422	MANAKARA ATSIMO	AMBILA	MNK_SCS1	Spot-check	7	Female	Yes	Primary	Yes	Yes	Yes	Yes	Yes	NA	NA	NA	NA	NA	NA	NA	NA	Negative	NA
FI06423	MANAKARA ATSIMO	AMBILA	MNK_SCS1	Spot-check	9	NA	Yes	Primary	Yes	Yes	Yes	Yes	Yes	NA	NA	NA	NA	NA	NA	NA	NA	Negative	NA
FI06424	MANAKARA ATSIMO	AMBILA	MNK_SCS1	Spot-check	12	Male	No	No education	Yes	Yes	Yes	Yes	Yes	NA	NA	NA	NA	NA	NA	NA	NA	Negative	NA
FI06425	MANAKARA ATSIMO	AMBILA	MNK_SCS1	Spot-check	12	Female	Yes	Primary	Yes	Yes	Yes	Yes	Yes	NA	NA	NA	NA	NA	NA	NA	NA	Negative	NA
FI06426	MANAKARA ATSIMO	AMBILA	MNK_SCS1	Spot-check	59	Male	Yes	Primary	Yes	Yes	Yes	Yes	Yes	Yes	No	No	Yes	No	No	No	Yes	Negative	NA
FI06427	MANAKARA ATSIMO	AMBILA	MNK_SCS1	Spot-check	21	Male	Yes	Secondary or higher	Yes	Yes	Yes	Yes	Yes	Yes	Yes	No	No	No	No	No	Yes	Negative	NA
FI06428	MANAKARA ATSIMO	AMBILA	MNK_SCS1	Spot-check	18	Male	Yes	Secondary or higher	Yes	Yes	Yes	Yes	Yes	Yes	No	No	Yes	No	No	No	Yes	Negative	NA
FI06429	MANAKARA ATSIMO	AMBILA	MNK_SCS1	Spot-check	18	Male	Yes	Secondary or higher	Yes	Yes	Yes	Yes	Yes	Yes	No	No	Yes	No	No	No	Yes	Negative	NA
FI06430	MANAKARA ATSIMO	AMBILA	MNK_SCS1	Spot-check	16	Female	Yes	Primary	Yes	Yes	Yes	Yes	Yes	No	No	No	No	No	No	No	No	Negative	NA
FI06431	MANAKARA ATSIMO	AMBILA	MNK_SCS1	Spot-check	36	Male	Yes	Primary	Yes	Yes	Yes	Yes	Yes	Yes	No	No	Yes	No	No	No	Yes	Negative	NA
FI06432	MANAKARA ATSIMO	AMBILA	MNK_SCS1	Spot-check	5	Female	Yes	Primary	Yes	Yes	Yes	No	No	No	No	No	No	No	No	No	No	Negative	NA
FI06433	MANAKARA ATSIMO	AMBILA	MNK_SCS1	Spot-check	31	Male	Yes	Primary	Yes	Yes	Yes	Yes	No	Yes	No	No	Yes	No	No	No	NA	Negative	NA
FI06434	MANAKARA ATSIMO	AMBILA	MNK_SCS1	Spot-check	11	Female	Yes	Primary	Yes	Yes	Yes	Yes	Yes	No	No	No	No	No	No	No	No	Negative	NA
FI06435	MANAKARA ATSIMO	AMBILA	MNK_SCS1	Spot-check	10	Female	No	No education	Yes	Yes	Yes	NA	NA	No	No	No	No	No	No	No	No	Negative	NA
FI06436	MANAKARA ATSIMO	AMBILA	MNK_SCS1	Spot-check	19	Male	Yes	Primary	Yes	Yes	Yes	No	No	Yes	No	No	Yes	No	No	No	Yes	Negative	NA
FI06437	MANAKARA ATSIMO	AMBILA	MNK_SCS1	Spot-check	15	Male	Yes	Primary	Yes	Yes	Yes	No	No	Yes	No	No	Yes	No	No	No	Yes	Negative	NA
FI06438	MANAKARA ATSIMO	AMBILA	MNK_SCS1	Spot-check	10	Female	No	No education	Yes	Yes	Yes	NA	Yes	No	No	No	No	No	No	No	No	Negative	NA
FI06439	MANAKARA ATSIMO	AMBILA	MNK_SCS1	Spot-check	31	Male	Yes	Secondary or higher	Yes	Yes	Yes	Yes	Yes	Yes	No	No	Yes	No	No	No	Yes	Negative	NA
FI06440	MANAKARA ATSIMO	AMBILA	MNK_SCS1	Spot-check	6	Female	Yes	Primary	Yes	Yes	Yes	NA	NA	No	No	No	No	No	No	No	No	Negative	NA
FI06441	MANAKARA ATSIMO	AMBILA	MNK_SCS1	Spot-check	5	Male	Yes	Primary	Yes	Yes	Yes	No	Yes	No	No	No	No	No	No	No	No	Negative	NA
FI06442	MANAKARA ATSIMO	AMBILA	MNK_SCS1	Spot-check	8	Male	No	No education	Yes	Yes	Yes	NA	Yes	No	No	No	No	No	No	No	No	Negative	NA
FI06443	MANAKARA ATSIMO	AMBILA	MNK_SCS1	Spot-check	11	Male	Yes	Primary	Yes	Yes	Yes	No	Yes	No	No	No	No	No	No	No	No	Negative	NA
FI06444	MANAKARA ATSIMO	AMBILA	MNK_SCS1	Spot-check	40	Male	Yes	Primary	Yes	Yes	Yes	Yes	Yes	Yes	No	No	Yes	No	No	No	Yes	Negative	NA
FI06445	MANAKARA ATSIMO	AMBILA	MNK_SCS1	Spot-check	12	Male	No	No education	NA	NA	NA	No	No	No	No	No	No	No	No	No	No	Negative	NA
FI06446	MANAKARA ATSIMO	AMBILA	MNK_SCS1	Spot-check	21	Male	No	No education	Yes	Yes	Yes	Yes	Yes	No	No	No	No	No	No	No	No	Negative	NA
FI06447	MANAKARA ATSIMO	AMBILA	MNK_SCS1	Spot-check	22	Male	Yes	Primary	Yes	Yes	Yes	Yes	Yes	No	No	No	No	No	No	No	No	Negative	NA
FI06448	MANAKARA ATSIMO	AMBILA	MNK_SCS1	Spot-check	16	NA	Yes	Secondary or higher	Yes	No	No	Yes	Yes	Yes	No	No	Yes	No	No	No	Yes	Negative	NA
FI06449	MANAKARA ATSIMO	AMBILA	MNK_SCS1	Spot-check	20	Male	No	No education	Yes	Yes	Yes	No	No	No	No	No	No	No	No	No	No	Negative	NA
FI06450	MANAKARA ATSIMO	AMBILA	MNK_SCS1	Spot-check	17	Male	No	No education	No	No	No	No	No	No	No	No	No	No	No	No	No	Negative	NA
FI06451	MANAKARA ATSIMO	AMBILA	MNK_SCS1	Spot-check	19	Female	No	No education	Yes	Yes	Yes	Yes	Yes	Yes	No	No	Yes	No	No	No	Yes	Negative	NA
FI06452	MANAKARA ATSIMO	AMBILA	MNK_SCS1	Spot-check	17	Male	Yes	Secondary or higher	Yes	Yes	Yes	Yes	Yes	Yes	No	No	Yes	No	No	No	Yes	Negative	NA
FI06453	MANAKARA ATSIMO	AMBILA	MNK_SCS1	Spot-check	11	Male	Yes	Primary	Yes	Yes	Yes	No	No	No	No	No	No	No	No	No	No	Negative	NA
FI06454	MANAKARA ATSIMO	AMBILA	MNK_SCS1	Spot-check	16	Male	No	No education	Yes	Yes	Yes	No	No	No	No	No	No	No	No	No	No	Negative	NA
FI06455	MANAKARA ATSIMO	AMBILA	MNK_SCS1	Spot-check	11	Female	No	No education	Yes	Yes	No	Yes	Yes	No	No	No	No	No	No	No	No	Negative	NA
FI06456	MANAKARA ATSIMO	AMBILA	MNK_SCS1	Spot-check	5	Male	Yes	Primary	Yes	Yes	Yes	No	No	No	No	No	No	No	No	No	No	Negative	NA
FI06457	MANAKARA ATSIMO	AMBILA	MNK_SCS1	Spot-check	13	Female	Yes	Secondary or higher	Yes	Yes	Yes	Yes	Yes	No	No	No	No	No	No	No	No	Negative	NA
FI06458	MANAKARA ATSIMO	AMBILA	MNK_SCS1	Spot-check	12	Female	Yes	Primary	Yes	Yes	Yes	Yes	Yes	No	No	No	No	No	No	No	No	Negative	NA
FI06459	MANAKARA ATSIMO	AMBILA	MNK_SCS1	Spot-check	18	Male	Yes	Secondary or higher	Yes	Yes	Yes	Yes	Yes	Yes	No	No	Yes	No	No	No	Yes	Negative	NA
FI06460	MANAKARA ATSIMO	AMBILA	MNK_SCS1	Spot-check	17	Female	No	No education	Yes	Yes	Yes	Yes	Yes	Yes	No	No	Yes	No	No	No	Yes	Negative	NA
FI06461	MANAKARA ATSIMO	AMBILA	MNK_SCS1	Spot-check	13	Female	No	No education	No	No	No	Yes	Yes	No	No	No	No	No	No	No	No	Negative	NA
FI06462	MANAKARA ATSIMO	AMBILA	MNK_SCS1	Spot-check	49	Male	No	No education	Yes	Yes	Yes	Yes	Yes	Yes	No	Yes	No	No	No	No	NA	Negative	NA
FI06463	MANAKARA ATSIMO	AMBILA	MNK_SCS1	Spot-check	10	Female	Yes	Primary	Yes	Yes	Yes	Yes	Yes	No	No	No	No	No	No	No	No	Negative	NA
FI06464	MANAKARA ATSIMO	AMBILA	MNK_SCS1	Spot-check	10	Female	Yes	Primary	Yes	Yes	Yes	No	Yes	No	No	No	No	No	No	No	No	Negative	NA
FI06465	MANAKARA ATSIMO	AMBILA	MNK_SCS1	Spot-check	18	Female	Yes	Primary	Yes	Yes	No	No	No	Yes	No	No	Yes	No	No	No	Yes	Negative	NA
FI06466	MANAKARA ATSIMO	AMBILA	MNK_SCS1	Spot-check	20	Female	Yes	Primary	Yes	Yes	Yes	Yes	Yes	Yes	No	No	Yes	No	No	No	Yes	Negative	NA
FI06467	MANAKARA ATSIMO	AMBILA	MNK_SCS1	Spot-check	50	Male	Yes	Primary	Yes	Yes	Yes	Yes	Yes	No	No	No	No	No	No	No	No	Negative	NA
FI06468	MANAKARA ATSIMO	AMBILA	MNK_SCS1	Spot-check	18	Female	Yes	Secondary or higher	Yes	Yes	Yes	NA	NA	No	No	No	No	No	No	No	No	Negative	NA
FI06469	MANAKARA ATSIMO	AMBILA	MNK_SCS1	Spot-check	7	Male	Yes	Primary	Yes	Yes	Yes	No	Yes	No	No	No	No	No	No	No	No	Negative	NA
FI06470	MANAKARA ATSIMO	AMBILA	MNK_SCS1	Spot-check	17	Female	Yes	Secondary or higher	Yes	Yes	Yes	No	Yes	Yes	No	No	Yes	No	No	No	Yes	Negative	NA
FI06471	MANAKARA ATSIMO	AMBILA	MNK_SCS1	Spot-check	28	Female	No	No education	Yes	Yes	Yes	No	No	No	No	No	No	No	No	No	No	Negative	NA
FI06472	MANAKARA ATSIMO	AMBILA	MNK_SCS1	Spot-check	9	Female	No	No education	Yes	Yes	Yes	No	No	No	No	No	No	No	No	No	No	Negative	NA
FI06473	MANAKARA ATSIMO	AMBILA	MNK_SCS1	Spot-check	10	Female	No	No education	Yes	Yes	Yes	No	No	No	No	No	No	No	No	No	No	Negative	NA
FI06474	MANAKARA ATSIMO	AMBILA	MNK_SCS1	Spot-check	9	Female	No	No education	Yes	Yes	Yes	No	No	No	No	No	No	No	No	No	No	Negative	NA
FI06475	MANAKARA ATSIMO	AMBILA	MNK_SCS1	Spot-check	12	Female	No	No education	Yes	Yes	Yes	No	No	No	No	No	No	No	No	No	No	Negative	NA
FI06476	MANAKARA ATSIMO	AMBILA	MNK_SCS1	Spot-check	13	Female	Yes	Primary	Yes	Yes	Yes	Yes	Yes	No	No	No	No	No	No	No	No	Negative	NA
FI06478	MANAKARA ATSIMO	AMBILA	MNK_SCS1	Spot-check	30	Male	Yes	Secondary or higher	Yes	Yes	Yes	Yes	NA	Yes	Yes	Yes	No	No	No	No	Yes	Negative	NA
FI06479	MANAKARA ATSIMO	AMBILA	MNK_SCS1	Spot-check	27	Male	No	No education	Yes	Yes	Yes	Yes	Yes	Yes	Yes	No	No	No	No	No	Yes	Negative	NA
FI06480	MANAKARA ATSIMO	AMBILA	MNK_SCS1	Spot-check	53	Male	Yes	Primary	Yes	Yes	Yes	NA	NA	Yes	No	No	Yes	No	No	No	Yes	Negative	NA
FI06481	MANAKARA ATSIMO	AMBILA	MNK_SCS1	Spot-check	30	Male	Yes	Primary	Yes	Yes	Yes	Yes	Yes	Yes	No	Yes	No	No	No	No	Yes	Negative	NA
FI06482	MANAKARA ATSIMO	AMBILA	MNK_SCS1	Spot-check	5	Female	Yes	Primary	Yes	Yes	Yes	NA	Yes	NA	NA	NA	NA	NA	NA	NA	NA	Negative	NA
FI06483	MANAKARA ATSIMO	AMBILA	MNK_SCS1	Spot-check	7	Male	Yes	Primary	Yes	Yes	Yes	NA	Yes	NA	NA	NA	NA	NA	NA	NA	NA	Negative	NA
[truncated: 1,326 more rows]
